# Supplementary material
Source: PubMed Central journal article supplement (PMC122208)
Supplement: pnas_022477199_6.pdf [file pnas_022477199_6.pdf]

|                     |                                   |
|---------------------|-----------------------------------|
| <i>Cynopterus</i>   | GAATAAAACTGAATAAGCAGAAACCTCCATGCT |
| <i>Pteropus</i>     | GAATAGAACTGAATAAGCAGAAACCTCCATGCT |
| <i>Rousettus</i>    | GAATAGAACTAAATAAGCAGAAACCTCCATGCT |
| <i>Nyctimene</i>    | GAATAGAACTGAATAAGCAGAAACCTCCATGCT |
| <i>Rhinolophus</i>  | GAAAAGAACTGAATAAGCAGAAACCTCCATGCT |
| <i>Hipposideros</i> | GAAAAGAACTGAATAAGCAGAAACCTCCATGCT |
| <i>Megaderma</i>    | GAAAAGAACTGAATAATCAGAAACCTCTATGCT |
| <i>Rhinopoma</i>    | GAAAAGAACTGAGTAAGCATAAACCTGCATGCT |
| <i>Nycteris t</i>   | GACAAGAA-----CTGCCNTGCT           |
| <i>Nycteris g</i>   | GACAAGAA-----CTGCCATGCT           |
| <i>Rhogeessa</i>    | GAAAAGAA-----CTTCCACGCT           |
| <i>Antrozous</i>    | GAAAAGAA-----CTTCCACGCT           |
| <i>Myotis</i>       | AAAAAGAA-----CTTCCACGCT           |
| <i>Tadarida</i>     | GAAAAGAA-----CCTCCAGGCT           |
| <i>Natalus</i>      | GAAAAGAA-----CCTCCATGCT           |
| <i>Taphozous</i>    | GAAAAGAA-----CCTCCATACT           |
| <i>Emballonura</i>  | GAAGAGAA-----CCTCCATGCT           |
| <i>Tonatia</i>      | GGGAAGAA-----TCTCCATCCT           |
| <i>Desmodus</i>     | GAAGAGAA-----TCTCCATCCT           |
| <i>Noctilio</i>     | GAAAAGAA-----CTTCCACGCT           |
| Cat                 | GAAA---CTGAGTAAGCAGAAATCTCCATGCT  |
| Mole                | GAAAAGAACTGAATAAGCAGAAACCTCCATGCT |
| Horse               | GAGAAGAACTGAATAAGCAGAAACCTCCACGCT |
| Cow                 | GAAAAGAACTGCGTAAGCAGAAACCTGCATGCC |
| Pangolin            | GAAAAGAACTGAATAAGCAGAAACCTTCATGCT |
| Whale               | GAAAAGAACTGAATAAGCAGAAACCTGCATGCT |
| Flying lemur        | GAAAAGAACGGAATATGCAGAAACCTCCATACC |
| Human               | GAAAAGAATGGAATAAGCAGAAACTGCCATGCT |
| Mouse               | GAGAGAAGTGGACTCACCCGCAAAGTCTGTGCC |
