# Supplementary material
Source: PubMed Central journal article supplement (PMC122208)
Supplement: pnas_022477199_7.pdf [file pnas_022477199_7.pdf]

Supporting information for Teeling *et al.* (January 22, 2002) *Proc. Natl. Acad. Sci. USA*,  
10.1073/pnas.022477199.

**Table 3. Koopman's (11) classification of bats**

Order Chiroptera  
Suborder Megachiroptera  
    Family Pteropodidae  
Suborder Microchiroptera  
Infraorder Yinochiroptera  
    Superfamily Emballonuroidea  
        Family Emballonuridae  
        Family Craseonycteridae  
        Family Rhinopomatidae  
    Superfamily Rhinolophoidea  
        Family Nycteridae  
        Family Megadermatidae  
        Family Rhinolophidae  
            Subfamily Rhinolophinae  
            Subfamily Hipposiderinae  
Infraorder Yangochiroptera  
    Superfamily Noctilionoidea  
        Family Mormoopidae  
        Family Noctilionidae  
        Family Phyllostomidae  
    Superfamily Vespertilionoidea  
        Family Mystacinidae  
        Family Molossidae  
        Family Vespertilionidae  
        Family Myzopodidae  
        Family Thyropteridae  
        Family Furipteridae  
        Family Natalidae

---
