# Supplementary material
Source: PubMed Central journal article supplement (PMC122208)
Supplement: pnas_022477199_8.pdf [file pnas_022477199_8.pdf]

**Table 4. Genbank accession numbers for sequences included in this study**

|                                  | <i>A2AB</i> | <i>BRCA1</i> | <i>RAG1</i> | <i>RAG2</i> | <i>vWF</i> |
|----------------------------------|-------------|--------------|-------------|-------------|------------|
| <b>Order Chiroptera</b>          |             |              |             |             |            |
| <i>Cynopterus sphinx</i>         | AJ251181    | AF203750     | AF203758    | AF203768    | U31605     |
| <i>Pteropus rayneri</i>          | AF337539    | AF203751     | AF203759    | AF203769    |            |
| <i>Pteropus hypomelanus</i>      |             |              |             |             | AF203777   |
| <i>Rousettus amplexicaudatus</i> | AJ315937    | AF447500     | AF447512    | AF447529    | AF447547   |
| <i>Nyctimene albiventer</i>      | AJ419805    | AF447502     | AF447514    | AF447531    | AF447549   |
| <i>Rhinolophus creaghi</i>       | AJ419806    | AF447499     | AF447511    | AF447528    | AF447546   |
| <i>Hipposideros commersoni</i>   | AF337538    | AF203752     | AF203760    | AF203770    | AF203778   |
| <i>Megaderma lyra</i>            | AF337537    | AF203749     | AF203757    | AF203767    | U31616     |
| <i>Nycteris grandis</i>          | AJ419807    | AF447494     | AF447506    | AF447523    | AF447541   |
| <i>Nycteris thebaica</i>         | AJ419808    | AF447501     | AF447513    | AF447530    | AF447548   |
| <i>Rhinopoma hardwickei</i>      | AJ419809    | AF447504     | AF447518    | AF447535    | AF447551   |
| <i>Emballonura atrata</i>        | AJ419810    | AF447505     | AF447519    | AF447536    | AF203776   |
| <i>Taphozous nudiventris</i>     | AF337543    | AF203748     | AF203756    | AF203766    | AF447540   |
| <i>Tonatia bidens*</i>           | AF337541    | AF203745     | AF203753    | AF203763    | U31622     |
| <i>Desmodus rotundus</i>         | AJ419811    | AF447503     | AF447517    | AF447534    | AF447550   |
| <i>Noctilio albiventris</i>      | AJ419812    | AF447497     | AF447509    | AF447526    | AF447544   |
| <i>Antrozous pallidus</i>        | AJ419813    | AF447495     | AF447507    | AF447524    | AF447542   |
| <i>Rhogeessa tumida</i>          | AJ419814    | AF447496     | AF447508    | AF447525    | AF447543   |
| <i>Myotis daubentoni</i>         | AF337540    | AF203746     | AF203754    | AF203764    |            |
| <i>Myotis velifer</i>            |             |              |             |             | AF203775   |
| <i>Natalus stramineus</i>        | AJ419815    | AF447498     | AF447510    | AF447527    | AF447545   |
| <i>Tadarida brasiliensis</i>     | AF337542    | AF203747     | AF203755    | AF203765    | AF061061   |
| <b>Order Carnivora</b>           |             |              |             |             |            |
| <i>Felis catus</i>               | AJ 251174   | AF284018     | AF203761    | AF203771    | U31613     |
| <b>Order Cetartiodactyla</b>     |             |              |             |             |            |
| <i>Bos taurus</i>                | Y15944      | AF284013     | AF447520    | AF447537    | AF004285   |
| <i>Megaptera novaeangliae</i>    |             | AF284017     | AF447522    | AF447539    | AF226849   |
| <i>Balaenoptera physalus</i>     | AJ251175    |              |             |             |            |
| <b>Order Dermoptera</b>          |             |              |             |             |            |
| <i>Cynocephalus variegatus</i>   | AJ251182    | AF019081     | AF203763    | AF203772    | U31606     |
| <b>Order Insectivora</b>         |             |              |             |             |            |
| <i>Talpa europaea</i>            | Y12520      |              | AF447515    | AF447532    |            |
| <i>Scalopus aquaticus</i>        |             | AF284007     |             |             | AF076479   |
| <b>Order Perissodactyla</b>      |             |              |             |             |            |
| <i>Equus asinus</i>              |             |              |             |             | U31610     |
| <i>Equus caballus</i>            | Y15945      | AF284010     | AF447516    | AF447533    |            |
| <b>Order Pholidota</b>           |             |              |             |             |            |
| <i>Manis sp.</i>                 | AJ251185    | AF284009     | AF447521    | AF447538    | U97535     |

**Order Primates**

*Homo sapiens* M34041 L78833 M29474 M94633 M25851

**Order Rodentia**

*Rattus norvegicus* M32061

*Mus musculus* U36475 M29475 M64796 AJ238390

---

\**Tonatia bidens* sequences are from sample TK10418, which was collected in Suriname.

According to unpublished data from Dr. Calvin Porter, this specimen may belong to *Tonatia saurophila* rather than *T. bidens*.
