# Supplementary material
Source: PubMed Central journal article supplement (PMC122208)
Supplement: pnas_022477199_10.pdf [file pnas_022477199_10.pdf]

Supporting information for Teeling *et al.* (January 22, 2002) *Proc. Natl. Acad. Sci. USA*, 10.1073/pnas.022477199.

**Table 6. Results of Kishino and Hasegawa tests**

| Comparison                                                  | -ln likelihood score   |                          | $\Delta$ in -ln likelihood and SD | <i>P</i> values for KH tests |
|-------------------------------------------------------------|------------------------|--------------------------|-----------------------------------|------------------------------|
| <b>1. Yinpterochiroptera vs. microbat monophyly</b>         | Yinpterochiroptera     | Microbat monophyly       |                                   |                              |
| a. Analyses w/ 28 taxa                                      | 60349.49               | 60367.22                 | 17.73, 8.80                       | 0.045                        |
| b. Analyses w/ 29 taxa                                      | 62500.75               | 62519.08                 | 18.33, 8.80                       | 0.037                        |
| <b>2. Yinpterochiroptera vs. megabats + emballonurids</b>   | Yinpterochiroptera     | Megabats + emballonurids |                                   |                              |
| a. Analyses w/ 28 taxa                                      | 60349.49               | 60551.87                 | 202.38, 30.42                     | <0.0001                      |
| b. Analyses w/ 29 taxa                                      | 62500.75               | 62705.71                 | 204.96, 29.57                     | <0.0001                      |
| <b>3. Microbat monophyly vs. megabats + emballonurids</b>   | Microbat monophyly     | Megabats + emballonurids |                                   |                              |
| a. Analyses w/ 28 taxa                                      | 60367.22               | 60551.87                 | 184.65, 29.22                     | <0.0001                      |
| b. Analyses w/ 29 taxa                                      | 62519.08               | 62705.71                 | 186.63, 28.33                     | <0.0001                      |
| <b>4. Rhinolophoid polyphyly vs. rhinolophoid monophyly</b> | Rhinolophoid polyphyly | Rhinolophoid monophyly   |                                   |                              |
| a. Analyses w/ 28 taxa                                      | 60349.49               | 60543.21                 | 193.72, 27.23                     | <0.0001                      |
| b. Analyses w/ 29 taxa                                      | 62500.75               | 62813.60                 | 312.85, 34.32                     | <0.0001                      |
