# Supplementary material
Source: PubMed Central journal article supplement (PMC122208)
Supplement: pnas_022477199_11.pdf [file pnas_022477199_11.pdf]

#NEXUS

BEGIN DATA;  
DIMENSIONS NTAX=29 NCHAR=7187;  
FORMAT MISSING=? GAP=- INTERLEAVE DATATYPE=DNA ;  
OPTIONS MSTAXA=UNCERTAIN ;

MATRIX

[ 10 20 30 40 50 ]  
[ . . . . . ]

Tonatia ?????????????????????????????????????????????????????????GCTCATT [50]  
Myotis TCAAACCTGCATGTGGAGCCATGTGGCACAGATACTCATGCCAGCTCATT [50]  
Tadarida TTTCACTTGCATGTGGAGCCATGTGGCACAGATACTCATGCCAGCTCATT [50]  
Taphozous TTCAACTTGCATGTGGAGCCATGTGGCACAAAGTACTCATGCCAGCTCAGT [50]  
Megaderma TTTCACTTGCATGTGGAGCCGTGTGGCACAAATACTCATGCCAGCTCATT [50]  
Cynopterus TTCAACTTGCATGTGGAGCCATGTGGCACAAATACTCATGCCAACTCATT [50]  
Pteropus ???AACTTGCATGTGGAGCCATGTGGCACAAATGCTCATGCCAGCTCTTT [50]  
Hipposideros TTCAACTTGCATGTGGAGCCATGTGGCACAAATACTCATGCCAGCTCTTT [50]  
Cat ?????????????????????????????????????????????????????????ATGTGGCACAAATACTCGTGCCAGCTCATT [50]  
Human TCAAACCTGCATGTGGAGCCATGTGGCACAAATACTCATGCCAGCTCATT [50]  
Mouse TCAAATGTGTGTGGAGCCATGTGGCACAGATGCTCATGCCAGCTCATT [50]  
Flyinglemur TCAAACCTGCATGTGGAGCCATGTGGCACAAATACTCATGCCAGCTCATT [50]  
NycterisG ????????????????????????????????????????????????????????????????????????????????????????????????????????? [50]  
Antrozous TTTAACTTGCATGTGGAGCCATGTGGCACAGATACTCATGCCAGCTCATT [50]  
Rhoageessa TTTAACTTGCATGTGGAGCCATGTGGCACAGATACTCATGCCAGCTCATT [50]  
Noctilio ????????????????????????????????????????????????????????????????????????????????????????????????????????? [50]  
Natalus TTCAACTTGCATGTGGAGCCATGTGGCACAAATACTCATGCCAGCTCATT [50]  
Rhinolophus ????????????????????????????????????????????????????????????????????????????????????????????????????????? [50]  
Rousettus ????????????????????????????????????????????????????????????????????????????????????????????????????????? [50]  
NycterisT ????????????????????????????????????????????????????????????????????????????????????????????????????????? [50]  
Nyctimene ????????????????????????????????????????????????????????????????????????????????????????????????????????? [50]  
Mole ????????????????????????????????????????????????????????????????????????????????????????????????????????? [50]  
Horse ????????????????????????????????????????????????????????????????????????????????????????????????????????? [50]  
Desmodus TTTAACTTGCATGTGAAGCCACGTGGCACAGTACTCATGCCAACTCATT [50]  
Rhinopoma ????????????????????????????????????????????????????????????????????????????????????????????????????????? [50]  
Emballonura ???AACTTGCATGTGGAGCCATGTAGCACAAATACTCATGCCGGCTCATT [50]  
Cow ????????????????????????????????????????????????????????????????????????????????????????????????????????? [50]  
Pangolin ????????????????????????????????????????????????????????????????????????????????????????????????????????? [50]  
Whale ????????????????????????????????????????????????????????????????????????????????????????????????????????? [50]

[ 60 70 80 90 100 ]  
[ . . . . . ]

Tonatia A?AGC?TGAGAACAGCAGTTTACTGCTCACTGAGGACCAGATGAGTGTGG [100]  
Myotis ACAGCATGAGAACAGCAGTTTACTACTCACCAGAGCAGAATGAATGTAG [100]  
Tadarida ACAGCATGAGAACAGCAGTTTACTACTCACTAAAGACAGAATGAATGTAG [100]  
Taphozous ACAGCATGAGAACAGCAGTTTACTACTCACTAAAGACAGAATGAATGTAG [100]  
Megaderma ACAGCATGAGAACAGCAGTTTACTACTCACTAAAGACAGAATGAATGTAG [100]  
Cynopterus ACAGCATGAGAACAGCAGTTTATTATACACTAAAGACAGAATGAATGTAG [100]  
Pteropus ACAGCATGAGAAC--AGTTTATTATACACTAAAGACAGAATGAATGTAG [97]  
Hipposideros ACATTATGAGCACAGCAGTTTATTACTCACTGAAGACAGAATGAATGTAG [100]  
Cat ACAGCATGAGAACAGCAGTTTATTACTCACTAAAGACAGAATGAATGTAG [100]  
Human ACAGCATGAGAACAGCAGTTTATTACTCACTAAAGACAGAATGAATGTAG [100]  
Mouse ACAGCCTGAGACCAGCAGTTTATTGCTCATTGAAGACAGAATGAATGCAG [100]  
Flyinglemur ACAGCATGAGAACAGCAGTTTATTACGCACTAAAGACAGAATAAATGTG [100]  
NycterisG ????????????????????????????????????????????????????????????????????????????????????????????????????????? [100]  
Antrozous ACAGCATGAGAACAGCAGTTTACTACTCGCTAAAGACGGAACGGATGTAG [100]  
Rhoageessa ACAGCCTGAGAACAGCAGTTTACTACTCGCTAAAGACGGAATGGATGTAG [100]  
Noctilio ACAGCCTGAGAACAGCAGTTTACTACTCGCTAAAGACGGAATGGATGTAG [100]  
Natalus ACAGCATGAGAACAGCAGTTTACTACTCACTAAAGACAGAATGAATGGAG [100]  
Rhinolophus ACAGCATGAGAACAGCAGTTTATTACTCACTGAAGACAGAATGAATGTAG [100]  
Rousettus ?????????ATGAGAACAGTATTATACACTAAAGACAGAATGAATGTAG [100]  
NycterisT ACAGCATGAGAACAGCAGTTTACTACTCACTAAAGACAGAATGAATGTAG [100]  
Nyctimene ACAGCATGAGAAC--AGTTTATTATACACTAAAGACAGAATGAATGTAG [97]  
Mole ACAGCATGAAAACAGCAGTTTATTACTCACTGAAAACAGAATGAATGTAG [100]  
Horse GCAGCATGAGAACAGCAGTTTATTACTCACTAAAGACAGAATGAATGTAG [100]  
Desmodus ACAGCCTGAGAACAGCAGTTTACTGCTCACTAAAGACAGAATGAATGTAG [100]  
Rhinopoma ????????????????????????????????????????????????????????????????????????????????????????????????????????? [100]  
Emballonura ACAGCATGAGAACAGCAGTTTACTACTCACTAAAGACAGACTGAATGTAG [100]  
Cow ACAGCATGAGAACAGCAGTTTATTGCTCACTGAAAACAGACTGAATGTAG [100]

Pangolin ACAGCATGAGAACAGCAGTTTATTACTCACTAAAGACAGAATAAATGTAG [100]  
 Whale ACAAATGAAAACAGCAGTTTATTACTCACTAAAGACAGAATGAATGTAG [100]

[ 110 120 130 140 150 ]  
 [ . . . . . ]

Tonatia GAAAGGCTGAATTCGGTCATGAAAGCAAGCAGCCCGGCTTAGCGAGGAGC [150]  
 Myotis AAAAGGCTGAATTCGTGAATAAAAAGCAAGCAGCCTGGCTTAGCAAGGAGC [150]  
 Tadarida AAAAGGCTGAATTCGTGAATAAAAAGCAAGCAGCCTGGCTTAGCAAGGAGC [150]  
 Taphozous AAAAGCTTGACTTCTGTGAATAAAAAGCAAGCAGCCTGGCTTAGCAAGGAGC [150]  
 Megaderma AAAAGGCTGAATTCGTGAATAAAAAGCAAAACAGCCTGTGTTAGCAAGGAGC [150]  
 Cynopterus AAAAGACTGACTTCTGTGAATAAAAAGCAAAACAGCCTGGCTTAGCAAGGAGC [150]  
 Pteropus AAAAGACTGACTTCTGTGAATAAAAAGCAAAACAGCCTGGCTTAGCAAGGAGC [147]  
 Hipposideros AAAAGGCTGAATTCGTGAATAAAAAGCAAGCAGCCTGGCTTAGCAAGGAGC [150]  
 Cat AAAAGGCTGAATTCGTGAATAAAAAGCAAAACAGCCTGGCTTAGCAAGGAGC [150]  
 Human AAAAGGCTGAATTCGTGAATAAAAAGCAAAACAGCCTGGCTTAGCAAGGAGC [150]  
 Mouse AAAAGGCTGAATTCGTGAATAAAAAGCAAAACAGCCTGGCTTAGCAAGGAGC [150]  
 Flyinglemur AAAAGGCTGAATTCGTGAATAAAAAGCAAAACAGCCTGGCTTAGCAAGGAGC [150]  
 NycterisG AAAAGGCTGAAGTCTGTGAATAAAAAGCCAGCAGCCTGGTTTAGCAATGAGT [150]  
 Antrozous AAAAGGCTGAATTCGTGAATAAAAAGCAAGCAGCCTGGCTTAGCAAGGAGC [150]  
 Rhogeessa AAAAGGCTGAATTCGTGAATAAAAAGCAAGCAGCCTAGCTTAGCAAGGAGC [150]  
 Noctilio AAAAGGCTGAATTCGTGAATAAAAAGCAAGCAGCCTAGCTTAGCAAGGAGC [150]  
 Natalus AAAAGGCTGAATTCGTGAATAAAAAGCAAAACAGCCTGGCTTAGCAAGGAGC [150]  
 Rhinolophus AAAAGGCTGAATTCGTGAATAAAAAGCAAGCAGCCTGGCTTAGCAAGGAGC [150]  
 Rousettus AAAAGACTGACTTCTGTGAATAAAAAGCAAAACAGCCTGGCTTAGCAAGGAGC [150]  
 NycterisT AAAAGGCTGAAGTCTGTGAATAAAAAGCAAGCAGCCTGGCTTAGCAAGGAGC [150]  
 Nyctimene AAAAGACTGACTTCTGTGAATAAAAAGCAAAACAGCCTGGCTTAGCAAGGAGC [147]  
 Mole AAAAGGCTGAATTCGTGAATAAAAAGCAAAACAGCCTGACTTAGCAAGGAGC [150]  
 Horse AAAAGGCTGAATTCGTGAATAAAAAGCAAAACAGCCTGGCTTAGCAAGGAGC [150]  
 Desmodus AAAAGGCTGAATTCGTGAATAAAAAGCAAGCAGCCTGGCTTAGCAAGGAGC [150]  
 Rhinopoma ??????????????????ATGAAAGCCAACAGCCTGGCTTAGCAAGGAGC [150]  
 Emballonura AAAAGCCTGAATTCGTGAATAAAAAGCAAGCAGCCTGGCTTAGCAAGGAGC [150]  
 Cow AAAAGGCTGAATTCGTGAATAAAAAGCAAAACAGCCTGTCTTAGTAAAGGAGC [150]  
 Pangolin AAAAGACTGAATTCGTGAATAAAAAGCAAAACAGCCTGGCTTAGCAAGGAGC [150]  
 Whale AAAAGGCTGAATTCGTGAATAAAAAGCAAAACAGCCTGTCTCAGCAAGGAGC [150]

[ 160 170 180 190 200 ]  
 [ . . . . . ]

Tonatia CAGCAGAGCAGATGGGCTGAAAAGTAAAGAAAACATGTGACGATAGGCAGGC [200]  
 Myotis CAGCAGAGCAGATGGGCTGAAAAGTAAAGAAAACATGTAATGATAGGCAGAC [200]  
 Tadarida CAGCAGAGCAGATGGGCTGAAAAGTAAAGAAAACATGTAATGATAGGCAGAC [200]  
 Taphozous CAGCAGAGCAGATGGGCTGAAAAGTAAAGAAAACATGTAATGATAGGCAGAC [200]  
 Megaderma CAGCAGAGCAGATGGGCTAACAGTAAAGAAAATATGTAATGATAGGCAGAC [200]  
 Cynopterus CAGCAGAACAGATGGGTTGAAAAGTAAAGAAAACATGTAATGATAGGCAGAC [200]  
 Pteropus CAACAGAACAGATGGGTTGAAAAGTAAAGAAAACATGTAACGATATGCAGAC [197]  
 Hipposideros CAACAGAGCAGATGGGCTGAAAAGTAAAGAAAACATGTAATGATAGGCAGAC [200]  
 Cat CAACAGAGCAGATGGGCTGAAAAGTAAAGAAAACATGTAATGATAGGCAGAC [200]  
 Human CAACATAACAGATGGGCTGAAAAGTAAAGAAAACATGTAATGATAGGCAGAC [200]  
 Mouse CAGCAGAGCAGATGGGCTGCAAGTAAAGGAAACATGTAACGACAGGCAGGT [200]  
 Flyinglemur CAGGAGAGCAGATGGGCTGAAAAGTAAAGAAAACATGTAATGATAGGCAGAC [200]  
 NycterisG CAGCAGAGCAGATGGGCTGAAAAGTAAAGAAAACATGTAATGATAGGCAGAC [200]  
 Antrozous CAGCAGAGCAGATGGGCTGAAAAGTAAAGAAAACATGTAATGATGGGCGGGC [200]  
 Rhogeessa CAGCAGAGCAGATGGGCTGAAAAGTAAAGAAAATATGTAATGATGGGCAAAC [200]  
 Noctilio CAGCAGAGCAGATGGGCTGAAAAGTAAAGAAAACATGTAATGATGGGCAAAC [200]  
 Natalus CAGCAGAGCAGATGGGCTGAAAAGTAAAGAAAACATGTAATGATAGGCAGAC [200]  
 Rhinolophus CAACAGAGCAGATGGGCTGAAAAGTAAAGAAAACATGTAATGATAGGCAGAC [200]  
 Rousettus CAACAGAACAGATGGGTTGAAAAGTAAAGAAAACATGTAATGATAGGCAGAC [200]  
 NycterisT CAACATAGCAGATGGGCTGAAAAGTAAAGAAAACATGTAATGATAGGC?GGC [200]  
 Nyctimene CAACAGAACAGATGGGTTGAAAAGTAAAGAAAACATGTAATGATAGGCAGAC [197]  
 Mole CAGCAGAACAGATGGGCTGAAAAGTAAAGAAAACATGTAATGATAGGCAGAC [200]  
 Horse CAACAGAGCAGACGGGCTGAAAAGTAAAGAAAACATGTAATGATAGGCAGGC [200]  
 Desmodus CAGCAGAGCAGATGGGCTGAAAAGTAAAGAAAACATGTAATGATAGGCAGAC [200]  
 Rhinopoma CCACAGACATATGGGCTGAAAAGTAAAGGAAACATGTAATGATAGGCAGAT [200]  
 Emballonura CAGCAGAGCAGATGGGCTGAAAAGTAAAGAAAACATGTAATGATAGGCAGAC [200]  
 Cow CAGCAGAGCAGATGGGCTGAAAAGTAAAGGACATGTAAGGATAGGCAGAT [200]  
 Pangolin CTGCAAGCAGATGGGCTGAATGTAAGAAAACATGTAACGATAGGCAGGC [200]  
 Whale CAACAGAGCAGATGGGCTGAAAAGTAAAGGACACATGTAATGATAGGCAGAC [200]

[ 210 220 230 240 250 ]  
 [ . . . . . ]

Tonatia TCCAGCGCAGAGGAAAAGGGCAGTTCTGAATGCTGATCCCCAGAATGGGA [250]

Myotis TCCAGCACAGAGAAAAGGGTAACTTCTGGATGCTGATCCTCTGAATGGG [250]  
 Tadarida TCTCAGCACAGAGAAAAGGGTAGTTCTGAATGCTGATCCTCTGAATAGGA [250]  
 Taphozous TCCCAGCACAGAGAAAAGGGTAGTTGGAATGCTGATACCCCTGGATGGGA [250]  
 Megaderma TCCCAACACAGAGAAAAGGGTAGTTCTGAATGCTGATCCCTTGAATGAGA [250]  
 Cynopterus TTCCAGCA?AGAGAAAAGGTAGTTCTGAATGCTGATCCCTTGAATGGAA [250]  
 Pteropus TTCCAGCACAGAGAAAAGGGTAGTTCTGAATGCTGATCCCTTGAATGGGA [247]  
 Hipposideros TCCCAGCACAGAGAAAAGGTAGTTCTGAATGCTGATCCCTTGAATGGGA [250]  
 Cat TCCCAGCACAGAGAAAAGGGTAGTTCTGAATGCTGATCCCTGTGTAGGA [250]  
 Human TCCCAGCACAGAGAAAAGGTAGATCTGAATGCTGATCCCTGTGTGAGA [250]  
 Mouse TCCCAGCACTGGGGAAAAGGTAGTCCAAACGCTGACTCCCTTAGTGATA [250]  
 Flyinglemur GCCCAGCACAGAGAAAAGATAGATCTAAATGCTGATCCCAGCATGGGA [250]  
 NycterisG TCCTGCACAGAGAAAAGGGTAGTCTGAATGCTGATCCCTTGAATGGGA [250]  
 Antrozous TCCCAGCACAGAGAAAAGGGCAATTTCTGAATGCTGATCCTCTGATTGGGG [250]  
 Rhogeessa GCCCAGCACAGAGAAAAGGGTAATTTCTGAATGCTGATCCTTGAATGGGA [250]  
 Noctilio GCCCAGCACAGAGAAAAGGGTAGTTCTGAATGCTGATCCTCTGAATGGGA [250]  
 Natalus ACCCAGCACAGAGAAAAGGGTAGTTCTGAATGTTGATCCTCTGAATGGGA [250]  
 Rhinolophus TCCCAGCACAGAGATAAAGTAATTTCTGAATGCTGATCCTCTGAATGGGA [250]  
 Rousettus TCCCAGCACAGAGAAAAGGTAGTTCTGAATGCTGATCCCTTGAATGGGA [250]  
 NycterisT TCCTGCACAGAGAAAAGGGTAGTCTGAATGCTGATCCCTTGAATCAGGA [250]  
 Nyctimene TTCCAACACAGAGAAAAGGTAGTTCTGAATGCTGATCCCTTGAATGAGA [247]  
 Mole TTCCAGCCACAGAGAAAAGGGTAGACCCGAATGCTGATCCCATGTATGGGA [250]  
 Horse CCCCAACTCAGAGAAAAGCTAGTTCTGAATGCTGATCCCGTGTATGGGA [250]  
 Desmodus TCCCAGCACAGAGAAAAGGGTAGTTCTGAATGCTGATCCTCTGAGTGGGA [250]  
 Rhinopoma TCCCAGCACAGAGAAAAGGGTAGTTCTGAATGCTGATCCCTTGAATGGGA [250]  
 Emballonura TCCCAGCACAGAGAAAAGGGTAGTTGTGAAAGCTGATACCCCTGAATGGGA [250]  
 Cow TCCCAGCACTGAGAAAAGATAAGTTCTGAATGCTGATCCCTTGTACAGAA [250]  
 Pangolin TCTCAGCACAGGAAAAGGTAGTTCTGAATGCTGATCCCTGTGTGGGA [250]  
 Whale TCCCAGTACAGAGAAAAGGTAGTTCTGAATGCTGATCCCTGTATGGGA [250]

[ 260 270 280 290 300 ]  
[ . . . . . ]

Tonatia GGGAAGAA-----TCTCCATCCTCTGACCACCTTAGAGAT [285]  
 Myotis AAAAAGAA-----CTTCCACGCTCTGACCATCCCAGAGAT [285]  
 Tadarida GAAAAGAA-----CCTCCAGGCTCTAATCTATCCTAGAGAT [285]  
 Taphozous GAAAAGAA-----CCTCCATACTCTGACTGTCTAATGAT [285]  
 Megaderma GAAAAGAACTGAATAATCAGAAAACCTCTATGCTCTGACAGTCTTAGAGAT [300]  
 Cynopterus GAATAAACTGAATAAGCAGAAAACCTCCATGCTCTGACAGTCTTAGAGAT [300]  
 Pteropus GAATAGAACTGAATAAGCAGAAAACCTCCATGCTCTGACAGTCTTAGAGAT [297]  
 Hipposideros GAAAAGAACTGAATAAGCAGAAAACCTCCATGCTCTGACAGTCTTAGGGAT [300]  
 Cat GAAAA--CTGAGTAAGCAGAAAATCTCCATGCTCTGACAGTCTTAGAGAT [297]  
 Human GAAAAGAACTGGAATAAGCAGAAAACCTGCCATGCTCAGAGAATCCTAGAGAT [300]  
 Mouse GAGAGAAGTGGACTCACCCGCAAAGTCTGTGCCCTGAGAATCTGGAGCT [300]  
 Flyinglemur GAAAAGAACTGGAATAATGAGAAAACCTCCATACCCTGAGAGTCTTAGAGAT [300]  
 NycterisG GAAAAGAA-----CTGCCATGCTCTGACCATCCTAGAGAT [285]  
 Antrozous GAAAAGAA-----CTTCCACGCTCTGACCATCCTAGAGAT [285]  
 Rhogeessa GAAAAGAA-----CCTCCACGCTCTGACCATCCTAGAGAT [285]  
 Noctilio GAAAAGAA-----CTTCCACGCTCTGACCATCCTAGAGAT [285]  
 Natalus GAAAAGAA-----CCTCCATGCTCTGACCGTCTGGAGAT [285]  
 Rhinolophus GAAAAGAACTGAATAAGCAGAAAACCTCCATGCTCTGACAATCCTAGACAT [300]  
 Rousettus GAATAGAACTAAATAAGCAGAAAACCTCCATGCTCTGACAGTCTTAGAGAT [300]  
 NycterisT GACAAGAA-----CTGCC?TGCTCTGACCATCCTAGAGAT [285]  
 Nyctimene GAATAGAACTGAATAAGCAGAAAACCTCCATGCTCTGACAGTCTTAGAGAT [297]  
 Mole GAAAAGAACTGAATAAGCAGAAAACCTCCATGCTCTGACAGCCTTAGAGAT [300]  
 Horse GAGAAGAACTGAATAAGCAGAAAACCTCCACGCTCTGACAGTCTTAGAGAC [300]  
 Desmodus GAAGAGAA-----TCTCCATCCTCTGACCGTCTTAGAGAT [285]  
 Rhinopoma GAAAAGAACTGAGTAAGCATAAACCTGCATGCTCTGAC?GTCTTAGAGAT [300]  
 Emballonura GAAGAGAA-----CCTCCATGCTCTGACTATCCTAGAGAT [285]  
 Cow GAAAAGAACTGCGTAAGCAGAAAACCTGCATGCCCTGACAGTCTTAGAGAT [300]  
 Pangolin GAAAAGAACTGAATAAGCAGAAAACCTTCATGCTCTGACAGTCTTAGAGAT [300]  
 Whale GAAAAGAACTGAATAAGCAGAAAACCTGCATGCTCTGACAGTCTTAGAGAT [300]

[ 310 320 330 340 350 ]  
[ . . . . . ]

Tonatia TCCCAAGATGTTCTTGGATAACACGGAATAGCAGCATAACAGAAAGTTAA [335]  
 Myotis TCCCAAGATGTGCCTTGGATAACACGGAGCAGTAGCATAACAGAAAGTTAA [335]  
 Tadarida TCCCAAGATGTTCTTGGATAACACGGAGTAGTAGCATAACAGAAAGTTAA [335]  
 Taphozous TCCCAAGATGTCCCTTGGATAACAGGGAATAGTAGCATAACAGAAAGTTAG [335]  
 Megaderma TCCCAAGACGTTCTTGGATAACACGTAATAGTAGCATAACAGAAAGTTAA [350]  
 Cynopterus TCCCAAGATATTCTTGGATAACACGGAATAGTAGCATAACAGAAAGTTAA [350]  
 Pteropus TCTCAAGATATTCTTGGATAACACGGAATAGTAGCATAACAGAAAGTTAA [347]  
 Hipposideros TCCCAAGTTGTTGCATGGATAACACAGAATAGTAGCATAACAGAAAGTTAA [350]

|             |                                                     |         |
|-------------|-----------------------------------------------------|---------|
| Cat         | TCCAAGATGTACCTTGGATAAACTGAATAGTAGCATACAGAAAGTTAA    | [ 347 ] |
| Human       | ACTGAAGATGTTCCCTTGGATAAACTAAATAGCAGCATTTCAGAAAGTTAA | [ 350 ] |
| Mouse       | ACCACCGATGTTCCCTTGGATAAACTAAATAGCAGCGTTTCAGAAAGTTAA | [ 350 ] |
| Flyinglemur | ACCCAAGATGTTCCCTTGGATAAACTAAACAGCAGCATTTCAGAAAGTTAA | [ 350 ] |
| NycterisG   | TCCAAGATGTTCCCTTGGATAGCAAAGAATAGTAGCATACAGAAAGTTAA  | [ 335 ] |
| Antrozous   | TCCAAGATGTGCCTTGGATAACACGAGCAGTAGCATACAGAAAGTTAA    | [ 335 ] |
| Rhogeessa   | TCCAAGATGTGCCTTGGATAACACGAGCAGTAGCATACAGAAAGTTAA    | [ 335 ] |
| Noctilio    | TCCAAGATGTGCCTTGGATAACACGAGCAGTAGCATACAGAAAGTTAA    | [ 335 ] |
| Natalus     | TCCAAGATGTTCCCTTGGATAACACGGAATAGTAGCATACAGAAAGTTAA  | [ 335 ] |
| Rhinolophus | TCCAAGATGTTCCGTTGGATAGCACAGAATAGTAGCATACAGAAAGTTAA  | [ 350 ] |
| Rousettus   | TCTCAAGATATTTCTTGGATAACACGGAATAGTAGCATACAGAAAGTTAA  | [ 350 ] |
| NycterisT   | TCCAAGATGTTCCCTTGGATAGCAAAGAATAGTAGCATTTCAGAAAGTTAA | [ 335 ] |
| Nyctimene   | TCCCAAAATATTTCTTGGATAACACGGAATAGTAGCATACAGAAAGTTAA  | [ 347 ] |
| Mole        | TCCAAGTGTGCCTTGGATAAACTGAACAGTAGCATTTCGAAAGTTAA     | [ 350 ] |
| Horse       | TCCAAGATGTTCCCTTGGATAAACTGAATAGTAGCATACAGAAAGTTAA   | [ 350 ] |
| Desmodus    | TCCAAGATGTTCCCTTGGATAGCACGGAATAGCAGCATACAGAAAGTTAA  | [ 335 ] |
| Rhinopoma   | TCCAAGATGTTTCTTGGATAACACGGAATAGTAGCATACAGAAAGTTAA   | [ 350 ] |
| Emballonura | TCCAAGATGTTCCCTTGGATAACAAAGAATAGTAGCATACAAAGTTAA    | [ 335 ] |
| Cow         | TCCAAGATGTTCCCTTGGATAACCTTGAATAATAGCATACAGAAAGTTAA  | [ 350 ] |
| Pangolin    | TCTCAAGACGTTCCCTTGGATAAACTAAATAGTAGCATACAGAAAGTTAA  | [ 350 ] |
| Whale       | TCCAAGATGTTCCCTTGGATAACAGTGAATAGTCGCATACAGAAAGTTAA  | [ 350 ] |

[ 360 370 380 390 400 ]  
[ . . . . . ]

|              |                                                     |         |
|--------------|-----------------------------------------------------|---------|
| Tonatia      | TGAGTGGTTTTCCAGACGTGATGAAACACGGACTTCCAACGGCTCCCACG  | [ 385 ] |
| Myotis       | TGAGTGGTTTTCCAGGCGTGATGAAATACTAATTCTGATGGCTCACATA   | [ 385 ] |
| Tadarida     | TGAGTGGTTCTCCAGACGTGATGAAATACTAATTCTGGTGGCTCACATA   | [ 385 ] |
| Taphozous    | TGAGTGGTTTTCCAGGCGTGATGAAATATTAATTCTGATGGATCACATG   | [ 385 ] |
| Megaderma    | TGAGTGGTTTTCCAGACGTGATGAAATACTAATTCTCATGGTTCACATG   | [ 400 ] |
| Cynopterus   | TGAGTGGTTTTCCAGACGTGATGAAACATTAATTCTGATGTCTTACTTG   | [ 400 ] |
| Pteropus     | TGAGTGGTTTTCCAGACGTGATGAAATATTAATTCTGATGTCTCACCTG   | [ 397 ] |
| Hipposideros | TGAGTGGTTTTCCAGACGTGATGAAATATTAATTCTCATAGCTCATGTT   | [ 400 ] |
| Cat          | TGAGTGGTTTTCCAGAAGTGATGAAATGTTAATTCTGATGACTCACATG   | [ 397 ] |
| Human        | TGAGTGGTTTTCCAGAAGTGATGAACGTGTTAGTTCGATGACTCACATG   | [ 400 ] |
| Mouse        | TGAGTGGTTTTCCAGAAGTGGTGAATGTTAATTCTGACAGCGCATCTG    | [ 400 ] |
| Flyinglemur  | TGAGTGGTTTTCCAGAAGTGATGAAATTTAGCTTCTGATGACTCACGTG   | [ 400 ] |
| NycterisG    | TGAGTGGTTTTCCAGGAGTGATGAAATATTAATTCTGATGGCTCACACG   | [ 385 ] |
| Antrozous    | TGAGTGGTTTTCCAGACGTGATGAAATACCAACTACTGATGGCTCACATG  | [ 385 ] |
| Rhogeessa    | TGAGTGGTTTTCCAGACGTGATGAAATACCAACTACTGAGGGCTCACATG  | [ 385 ] |
| Noctilio     | TGAGTGGTTTTCCAGACGTGATGAAATACCAACTACTGAGGGCTCACATG  | [ 385 ] |
| Natalus      | TGAGTGGTTTTCCAGACGTGATGAAATATTAATTCTGATGGCTCACATA   | [ 385 ] |
| Rhinolophus  | TGAGTGGTTTTCCAGACATGATGAAATAGTAACGTCTCATGGCTCACGTG  | [ 400 ] |
| Rousettus    | TGAGTGGTTTTCCAGACGTGATGAAATATTAATTCTGATGTCTCACCTG   | [ 400 ] |
| NycterisT    | TGAGTGGTTTTCCAGGAGTGATGAAATATTAATTCTGATGGCTCACACG   | [ 385 ] |
| Nyctimene    | TGAGTGGTTTTCCAGACGTGATGAAATATTAATTCTGATGTCTCACCTG   | [ 397 ] |
| Mole         | TGAGTGGTTTTCCAGAAGTGATGAAATATTAATTCTGATGAATCTCGTG   | [ 400 ] |
| Horse        | TGAGTGGTTTTCCAGAAGTGAGGAAATGTTAATTCTGATGACTCATGTG   | [ 400 ] |
| Desmodus     | TGAGTGGTTTTCCAGGCGTGATGAAATGTTTCACTTCTGAGGGCTCACATG | [ 385 ] |
| Rhinopoma    | TGAGTGGTTTTCCAGACGTGATGGTTTTCCAATTCTCTGGCTCATATG    | [ 400 ] |
| Emballonura  | TGAGTGGTTTTCCAGACATGATGAAACATTAATTCTGATGGATCACATG   | [ 385 ] |
| Cow          | TGAGTGGTTTTCCAGAAGTGATGAAATATTAATTCTGATGACTCGTGGC   | [ 400 ] |
| Pangolin     | TGAGTGGTTTTCCAGAAGTGATGAAATGTTAATTCTGATGATCCATGTG   | [ 400 ] |
| Whale        | TGAATGGTTTTCCAGAAGTGATGAAATGTTAATTCTAACGACTCACGTG   | [ 400 ] |

[ 410 420 430 440 450 ]  
[ . . . . . ]

|              |                                                    |         |
|--------------|----------------------------------------------------|---------|
| Tonatia      | GTGGGAGGCTGAGTCAGACACGGAAGGAGCCGACACGGTAGAAGCTCCG  | [ 435 ] |
| Myotis       | ATGGCAAGTCTGAGTCAAATGCTGAAGTAGCTGGTGCAGTGAAGTTGCA  | [ 435 ] |
| Tadarida     | ACGGTAGATTTGAATCAAATGTTGAAGTAGCTGGTGCAGTAGAAGTTCCA | [ 435 ] |
| Taphozous    | ATGGGAGATCTGAATCAAATATGGAAGTAGCTGGTGCAGTAGAAGTTCCA | [ 435 ] |
| Megaderma    | ATGGGACAGGTGGATCAAATACAGAAGAAGCTGGTGCAGCAGAAATCTA  | [ 450 ] |
| Cynopterus   | ATGAGAGTCTGAATCAAATGTG-----GTAGAAGTTCCA            | [ 435 ] |
| Pteropus     | ATGGGAGTCTGAATCAAATGTG-----GTAGAAGTTCCA            | [ 432 ] |
| Hipposideros | ATGGGAGAGCTGAATCAAATACAGAAGTATCTGGTGCAGTAGAAGTTCCA | [ 450 ] |
| Cat          | ATGAGGGATCTGAATCGAATCCTGGAGTAGCTGGTGC---GAAGTTCCA  | [ 444 ] |
| Human        | ATGGGAGTCTGAATCAAATGCCAAAGTAGCTGATGTATTGGACGTTCTA  | [ 450 ] |
| Mouse        | CCAGGAGGCACGAGTCAAATGCTGAAGCAGCTGTTGTGTTGAAGTTTCA  | [ 450 ] |
| Flyinglemur  | ACAGGGTGTCTGAATCAAATGCCAAAGTAGCTGGTGCATTAGAAGTTCCA | [ 450 ] |
| NycterisG    | ATAGGAGTCTGAGTCAAATATGGAAGCAGCTGGTGCAGTAGAAGTTCCA  | [ 435 ] |
| Antrozous    | ATGGGAAGTCTGAGTCAAATGTGGACGTAGCTGGTGCAGTGAAGTTCCA  | [ 435 ] |
| Rhogeessa    | ATGGGAAGTCTGAGTCAGATGTTGATGTAGCTGGTGCAGTGAAGTTCCA  | [ 435 ] |

|             |                                                    |                                    |         |
|-------------|----------------------------------------------------|------------------------------------|---------|
| Noctilio    | ATGGGAAGTCTGAGT                                    | CAGATGTTGATGTAGCTGGTGCAGTGAAGTTCCA | [ 435 ] |
| Natalus     | GTGGGAGGGCTGAATCAAATGTTGAAGTAGCTGGTGCAGTACAAGTTCCA | [ 435 ]                            |         |
| Rhinolophus | ATGGAAGAGCTGAATCAGATACAGAAGTAGCTGGTGCA---GAAGTTCCA | [ 447 ]                            |         |
| Rousettus   | ATGGGAGGTCTGAATCAAATGTG-----GTAGAAGTTCCA           | [ 435 ]                            |         |
| NycterisT   | ATAGGAGGTCTGAGTCAAATATGGAAGTAGCTGGTGCAGTAGAAGTTCCA | [ 435 ]                            |         |
| Nyctimene   | ATGAGAAGTCTGAATCAAATGTG-----GTAGAAGTTCCA           | [ 432 ]                            |         |
| Mole        | ATGGGAGTCCCCATCAAATATGAAATGACTGGTGAAGTAGAAGTTCCA   | [ 450 ]                            |         |
| Horse       | ACGGAGGGCCTGAATCAAATACAGAAGTAGCTGGTGCAGTAGAAGTTCCA | [ 450 ]                            |         |
| Desmodus    | ATGGGAGGCCTGAATCAAATATGGAAGTAGCTGATCGGTTAGAAGTTCCG | [ 435 ]                            |         |
| Rhinopoma   | ATGGGAGGGCTGAATCAAATACAGACATAGCTGGTGCAGTAGAAGTTCCA | [ 450 ]                            |         |
| Emballonura | TTGGGAGTCTTACTCAAATATGGAAGTAGCTGCTGCAGTAGAAGTTCCA  | [ 435 ]                            |         |
| Cow         | ATGGGGGGTYTGAATCAAATAATGAAGTAGCTGGTGCAGTGAAGTTCCA  | [ 450 ]                            |         |
| Pangolin    | ATGGGAGGTCTGAATCAAATACTGAAGTAGCTGGTGCAGTAGAAGTTCCA | [ 450 ]                            |         |
| Whale       | ATGGGGGATTTGAATCAAACACTGAAGTAGCTTGTGCAGTGAAGTTCCA  | [ 450 ]                            |         |

[ 460 470 480 490 500 ]  
[ . . . . . ]

|              |                                                     |         |
|--------------|-----------------------------------------------------|---------|
| Tonatia      | GACGAAGTGCCTGGATGCCCTGGCTCTCCAGAGAACACAGCCTCGCCGGC  | [ 485 ] |
| Myotis       | AATGAAGTAGATGGGTATTCTGGTCTCCAGGAAAATAACCTTAATGGC    | [ 485 ] |
| Tadarida     | AATGAAGTAGATGGATATTCTGGTCTCCAGAGAAAATAGCCTTAATGGC   | [ 485 ] |
| Taphozous    | TATGAAGTAGATGGATATTCTGATTCTCCAGAGAAAATAGCCTTAATGGC  | [ 485 ] |
| Megaderma    | AATGAAGTAGATGGATATTCTGGTCTTCCAGAGAAAATAGCTTTAATGGC  | [ 500 ] |
| Cynopterus   | AATGAAGTAGATGGATACTCTGGTGTCTCAGAGGAAAATAGCCTTAAGGC  | [ 485 ] |
| Pteropus     | AATGAAGTAGATGGATACTCTGGTGTCTCAGAGAAAATAGCTTTAAGGC   | [ 482 ] |
| Hipposideros | CTTGAAGTAGATGGATTCTGGCTCTACAGAGAAAATAACCTTAATGAC    | [ 500 ] |
| Cat          | AATGTAGTGGATGGATATTCTGGTCTTCTGAGAAAATAGACTTAATGGC   | [ 494 ] |
| Human        | AATGAGGTAGATGAATATTCTGGTCTTCCAGAGAAAATAGACTTACTGGC  | [ 500 ] |
| Mouse        | AACGAAGTGGATGGGGTTTTGTAGTCTTCAAGGAAAACAGACTTAGTAAC  | [ 500 ] |
| Flyinglemur  | AATGATGTAGATGGATATTCTGATTCTTCCAGAGAAAATAGCTTTAATGGC | [ 500 ] |
| NycterisG    | AACAAAGTAGATAAATATTCTGGTCTTCCAGAGAAAACAACCTTAATGGC  | [ 485 ] |
| Antrozous    | AATGAAGTAGATGGGTATGCTGGTCTCCAGGAAAATAAACTTAAGGGC    | [ 485 ] |
| Rhogeessa    | AACGAAGTAGATGGGTATTCTGGTCTTCCAGAGAAAATAAACTTAATGGC  | [ 485 ] |
| Noctilio     | AACGAAGTAGATGGGTATTCTGGTCTTCCAGAGAAAATAAACTTAATGGC  | [ 485 ] |
| Natalus      | AATGAAATAGATGGATATCCAGTCTCCAGAGAAAATAGCCTTAATAGC    | [ 485 ] |
| Rhinolophus  | AATGAAGTAGTGGATATTCTGCTTCTTCCAGAGAAAATAGCCTTAATGAC  | [ 497 ] |
| Rousettus    | AATGAAGTAGATGGATACTCTGGTGTCTCAGAGAAAATAGCTTTAAGGC   | [ 485 ] |
| NycterisT    | AACAAAGTAGATGAATATTCTGGTCTTCCAGAGAAAACAACCTTAATCCC  | [ 485 ] |
| Nyctimene    | AATGAAGTAGATGGATACTCTGATGTCTCAGAGAAAATAGCTTTAAGGC   | [ 482 ] |
| Mole         | AACACAGTAGATGGATTTTCTGGTCTTCCAGAGAAAATAGACTTAATGGC  | [ 500 ] |
| Horse        | AATGAAGTAGATGGATACTCTGGTCTTCCAGAGAAAATAGACTTAATGGC  | [ 500 ] |
| Desmodus     | AACGAAGGAGGTGTATATCCTGGTCTTCCAGAGAAAATAGCCTCACTGTC  | [ 485 ] |
| Rhinopoma    | AATGAAATAGATGGATATTCTGGTCTTCCAGAGAAAATAGCCTTAATGTC  | [ 500 ] |
| Emballonura  | AATGA---AGATGGATATTCTGGTCTTCCAGATAAAAATAGCCTTAATGGC | [ 482 ] |
| Cow          | AATGAAGTAGATGGATATTCTGGTCTTCCAGAGAAAATCAACTTAATGGC  | [ 500 ] |
| Pangolin     | AATGAAGTAGATGAAAATTTGGTCTTCCAGAGAAAAAGACTTAATGGC    | [ 500 ] |
| Whale        | AAGGAAGTTGATGGATATTTGGGTTCTTCCAGAGAAAATAGACTTAATGGC | [ 500 ] |

[ 510 520 530 540 550 ]  
[ . . . . . ]

|              |                                                    |         |
|--------------|----------------------------------------------------|---------|
| Tonatia      | CGGCGAGCCTCATGGCGCTTTAATGTGCGGAAGTGAAGCGTCCACTCCA  | [ 535 ] |
| Myotis       | CCATGATCCTCATGGTGTCTTAACTGTGAAAGTGAAGAGTTCACTCCA   | [ 535 ] |
| Tadarida     | CTGTGATCCTCCTGATGCTTTAATATGTGAA-----AGAGTCTCCTCTA  | [ 529 ] |
| Taphozous    | CAGTGATCCTCTTGGTGTCTTACTATGTGAAAGTGAAGAAATCCACTCCA | [ 535 ] |
| Megaderma    | CAGTGATCCTCCTGGTGTCTTCAATTTGTGAAAGTGAAGAGTCTACTCCA | [ 550 ] |
| Cynopterus   | CAGTGATCCTCATGGTGTCTTAAATATGTGAA-----AGAGTCTACTCCA | [ 529 ] |
| Pteropus     | CAATGATCCTCATGGTGTCTTAAATGTGCGAA-----AGAGTCTACTCCA | [ 526 ] |
| Hipposideros | CAGTGATCCTCATGATGCTGTAATATGTGAAAGTGAAGAGTCCACTCCA  | [ 550 ] |
| Cat          | CAGTGATCCTCATGATGCTTTGATATGTGAAAGTGAAGAGTTCACACCA  | [ 544 ] |
| Human        | CAGTGATCCTCATGAGGCTTTAATATGTAAAAGTGAAGAGTTCACTCCA  | [ 550 ] |
| Mouse        | CCCCGACCCCATCATACTTTAATGTGTAAGTGAAGAGACTTCTCCA     | [ 550 ] |
| Flyinglemur  | CAGTGATCCTCATGATGCTTTAATATGTAAAAGTGAAGAAATCCACTCCA | [ 550 ] |
| NycterisG    | CAGTGATCCTCATGGTATTTTAAATATGTGAAAGTGAAGAGTCCACTCCA | [ 535 ] |
| Antrozous    | CCCTGATCCTCGTGGTGTCTTAAATGTGTGAAAGTGAAGAGTTCACTCCA | [ 535 ] |
| Rhogeessa    | CCCTGATCCTCATGGTGTCTTAAATGTGTGAGAGTGAAGAGTTCACTCCA | [ 535 ] |
| Noctilio     | CCCTGATCCTCATGGTGTCTTAAATGTGTGAGAGTGAAGAGTTCACTCCA | [ 535 ] |
| Natalus      | CCATGACCTCATGGTAGTTAATATGTAAAAGTGAAGAGTTTACTCCA    | [ 535 ] |
| Rhinolophus  | CAGTGACCTTCTATGATGTGTTGCTATGTGAAAGTGAAGAGTCCACTCCA | [ 547 ] |
| Rousettus    | CAATGATCCTCATGGTGTCTTAAATATGTGAA-----AGAGTCCACTACA | [ 529 ] |
| NycterisT    | CAGTGATCCTGATGGTACTTTAATATGTGAAAGTGAAGAGTCTACTCCA  | [ 535 ] |
| Nyctimene    | CAGTGATCCTCATGGTGCATTAACATGTGAA-----AGAGTCTACTCCA  | [ 526 ] |
| Mole         | CAGCGATCCTCCC---GCTTTAATGTGTAAAAGTGAAGAGTCCGCACCA  | [ 547 ] |

|             |                                                    |         |
|-------------|----------------------------------------------------|---------|
| Horse       | CGGTGATCCTTCTAGTGCTTTAATATGTGAAAGTGAAGAGTCCGCTCCA  | [ 550 ] |
| Desmodus    | CAGTGAGCCTCATGGTACTGTAATATGTGAAAGCGAAAGAGTCCACTCCA | [ 535 ] |
| Rhinopoma   | CAGTGATCCTCATCATGCTTTAATATGTGAAAATGAAAGAGTCCGCTCCA | [ 550 ] |
| Emballonura | CAGTGATCCTCACAGTGCTTTAATATGTGAAAGTGAAGAGTCCACTCCA  | [ 532 ] |
| Cow         | CAGTGATCCTCATGGTACTTTAATACACGAA-----AGAGTCCACTCCA  | [ 544 ] |
| Pangolin    | CAGTGATCCTCATGATGCTTTAATACGTGAAAGTAAAAGAGGCCACTCCA | [ 550 ] |
| Whale       | CAGTGATCCTCATGGTGTCTTTAATACGTGAAAGTGAAGAGTCCACTCCA | [ 550 ] |

|   |     |     |     |     |      |
|---|-----|-----|-----|-----|------|
| [ | 560 | 570 | 580 | 590 | 600] |
| [ | .   | .   | .   | .   | .]   |

|              |                                                      |         |
|--------------|------------------------------------------------------|---------|
| Tonatia      | AACCAGTGGAGAGTAATATTGAAGATAAAAATATTTGGGAAAACCTATCGG  | [ 585 ] |
| Myotis       | AACCAGTAGAAAGTAATATTGAAGATAAAAATATTTGGGAAAACCTATCGG  | [ 585 ] |
| Tadarida     | AACCAGTAGAAAGTAATATTGAAGATAAAAATATTTGGGAAAACCTATCGG  | [ 579 ] |
| Taphozous    | AACCAGTAGAAAGTAATATTGAAGATAAAAATATTTGGGAAAACCTATCGG  | [ 585 ] |
| Megaderma    | AACCAGTAGAAAGTAATATTGAAGATAAAAATATTTGGGAAAACCTACAGG  | [ 600 ] |
| Cynopterus   | AATTTGATAGAAAGTAATATTGAAGATAAAAATATTTGGGAAAACATATCGG | [ 579 ] |
| Pteropus     | AACTGGTAGAAAGTAATATTGAAGATAAAAATATTTGGGAAAACATATCGG  | [ 576 ] |
| Hipposideros | AACCATTGGAAAGTACTATTGAAGATAAAAATATTTGGGAAAACCTATCGG  | [ 600 ] |
| Cat          | AACCAGTAGAGAGTAATATTGAAGATAAAAATATTTGGGAAAACCTATCGG  | [ 594 ] |
| Human        | AATCAGTAGAGAGTAATATTGAAGACAAAATATTTGGGAAAACCTATCGG   | [ 600 ] |
| Mouse        | AACCAGTAGAGGATAATATCAGTGATAAAAATATTTGGGAAAATCCTATCAG | [ 600 ] |
| Flyinglemur  | GACCAGTAGAGAGTAATATCAAAGATAAAAATATTTGGGAAAACCTATCAG  | [ 600 ] |
| NycterisG    | AACCAGTAGAAAGCAATATTGAAGATAAAAATATTTGGGAAAACCTATCGG  | [ 585 ] |
| Antrozous    | AACCATTGCAAGTAATATTGAAGATAAAAATATTTGGGAAAACCTATCGG   | [ 585 ] |
| Rhogeessa    | AACCAGTAGAAAGTAATATTGAAGATAAAAATATTTGGGAAAACCTATCGG  | [ 585 ] |
| Noctilio     | AACCAGTAGAAAGTAATATTGAAGATAAAAATATTTGGGAAAACCTTTCCG  | [ 585 ] |
| Natalus      | AACCAGTAGAAAGTAACATTGAAGATAAAAATATTTGGGAAAACCTACCGG  | [ 585 ] |
| Rhinolophus  | AACCAGTGGAAACTACTATTGAAGATAAAAATATTTGGGAAAACCTATCGG  | [ 597 ] |
| Rousettus    | AACTGGTAGAAAGTAATATTGAAGATAAAAATATTTGGGAAAACATATCAC  | [ 579 ] |
| NycterisT    | AACCAGTAGAAAGCAGTATTGAAGATAAAAATATTTGGGAAAACCTATCGG  | [ 585 ] |
| Nyctimene    | AACAGGTAGAAAGTAATATTGAAGATAAAAATATTTGGGAAAACATATCGG  | [ 576 ] |
| Mole         | AACCAGTAGAAAGTAATATTGAAGATAAGATAATTTGGGAAAACCTATCGG  | [ 597 ] |
| Horse        | AACCAGTAGAGATAATATTGAAGATAAGATAATTTGGGAAAACCTATCGG   | [ 600 ] |
| Desmodus     | AACCAGTAGAAAGTAATATCGAAGATAAGATAATTTGGGAAAACCTATCGG  | [ 585 ] |
| Rhinopoma    | AACCAGTAGAAAGTACTATTGAAGATAAAAATATTTGGGAAAACCTATCAG  | [ 600 ] |
| Emballonura  | AACCAGTAGAAAGTAATATTGAAGATAAAAATATTTGGGAAAACCTATCGG  | [ 582 ] |
| Cow          | AACCCGTAGAGAGTAATATTGAAGATAAAAATATTTGGGAAAACCTATCGG  | [ 594 ] |
| Pangolin     | AACCAGTAGAGAGTAATACTGAAGATAAAAATATTTGGGAAAACCTATCGG  | [ 600 ] |
| Whale        | AACCAGTAGAGAGTAATATTGAAGATAAAAATATTTGGGAAAACCTATCGG  | [ 600 ] |

|   |     |     |     |     |      |
|---|-----|-----|-----|-----|------|
| [ | 610 | 620 | 630 | 640 | 650] |
| [ | .   | .   | .   | .   | .]   |

|              |                                                       |         |
|--------------|-------------------------------------------------------|---------|
| Tonatia      | AGGAAGGCAAGCCTCCCTAAGCTTGGAGCCACGTAAGTACAGGCTAACTAC   | [ 635 ] |
| Myotis       | AGGAAGGCAAGCCTCCCAAACTTGGAGCCACATAACTAAAAATCTAATTGT   | [ 635 ] |
| Tadarida     | AGAAAGGCAAGCCTCCCTAAGCTTGGAGCCACATAAGTGAAAAATCTAATTAT | [ 629 ] |
| Taphozous    | AGGAAGGCAAGCCTCCCTAAGCTTGGAGCCACATAACTGAAAAATCTAATTAT | [ 635 ] |
| Megaderma    | AGGAAGGCAAGCCTCCCTAAGCTTGGAGCCACAGAGCTGAAAAATCTAATTAT | [ 650 ] |
| Cynopterus   | AGGAAGGCAAGCCTCCCTAAGCTTGGAGCCACATAACTGAAAAATCTAATTAC | [ 629 ] |
| Pteropus     | AGGAAGGCAAGCCTCCCTAAGCTTGGAGCCACATAACTGAAAAATCTAATTAC | [ 626 ] |
| Hipposideros | AGGAAGGCAAGCCTCCCTAAGCTTGGAGCCACATAACTGAAAAATCTAATTAT | [ 650 ] |
| Cat          | AGGAAGGCAAGCCTCCCTAAGCTTGGAGCCACATAAGTGAAGATCTCATTAT  | [ 644 ] |
| Human        | AAGAAGGCAAGCCTCCCAAACTTAAAGCCATGTAAGTGAAGATCTAATTAT   | [ 650 ] |
| Mouse        | AGAAAGGCAAGCCTCCCTAAGCTTGGAGCCACGTAAGTGAAGATCTAATTAT  | [ 644 ] |
| Flyinglemur  | AGGAAGGCAAGCCTCCCTAAGCTTGGAGCCACGTAAGTGAAGATCTAATTAT  | [ 650 ] |
| NycterisG    | AGGAAGGCAAGCCTCCCTAAGCTTAAAGTCATATAACTGAAAAATCTAATTAG | [ 635 ] |
| Antrozous    | AGGAAGGCAAGCCTCCCTAAGCTTGGAGCCACATAACTGAAAAATCTAATTAT | [ 635 ] |
| Rhogeessa    | AGGAAGGCAAGCCTCCCTAAGCTTGGAGCCACATAACTGAAAAATCTAATTAT | [ 635 ] |
| Noctilio     | AGGAAGGCAAGCCTCCCTAAGCTTGGAGCCACATAACTGAAAAATCTAATTAT | [ 635 ] |
| Natalus      | AGGAAGGCAAGCCTCCCTAAGCTTGGAGCCACATAACTGAAAAATCTAATTAT | [ 635 ] |
| Rhinolophus  | AGGAAGGCAAGCCTCCCTAAGCTTGGAGCCACATAACTGAAAAATCTAATTGT | [ 647 ] |
| Rousettus    | AGGAAGGCAAGCCTCCCTAAGCTTGGAGCCACATAACTGAAAAATCTAATTAC | [ 629 ] |
| NycterisT    | AGGAAGGCAAGCCTCCCTAAGCTTAAAGCCATATAACTAAAAATCTAATTAG  | [ 635 ] |
| Nyctimene    | AGGAAGGCAAGCCTCCCTAAGCTTGGAGCCACATAACTGAAAAATCTAATTAC | [ 626 ] |
| Mole         | AGGAAGGCAAGCCTCCCAAACTTGGAGCCACGTTGGCTGAATATTTAATTAC  | [ 647 ] |
| Horse        | AGGAAGGCAAGCCTCCCTAAGCTTGGAGCCACATAACTGAAAGATCTAATTAT | [ 650 ] |
| Desmodus     | AGGAAGGCAAGCCTCCCTAAGCTTGGAGCCACATAACTGAAAAATCTAATTGT | [ 635 ] |
| Rhinopoma    | AGAAAGGCAAGCCTCCCTAAGCTTGGAGCCACATAACTGAAAAATCTAATTAT | [ 650 ] |
| Emballonura  | AGGAAGGCAAGCCTCCCTAAGCTTAAAGCCGATAACTGAAAGCCTAATTAG   | [ 632 ] |
| Cow          | AGGAAGGCAAGCTCCCTAAGCTTGGAGCCACATAACTGAAAGATCTAATTCT  | [ 644 ] |
| Pangolin     | AAGAAGGCAAGCTTCTCTCACTTGGAGCCACGTAAGTGAAGATCTAATTAT   | [ 650 ] |
| Whale        | AGGAAGGCAAGCCTCCCTAAGCTTGGAGCCACATAACTGAAAGATCTAATTAT | [ 650 ] |

|              |                                                      |     |     |     |      |       |
|--------------|------------------------------------------------------|-----|-----|-----|------|-------|
| [            | 660                                                  | 670 | 680 | 690 | 700] |       |
| [            | .                                                    | .   | .   | .   | .    | .]    |
| Tonatia      | GGGACTGTCCGCTCCAGACCCTCAGATAACACGAGAGCGTCCCTTCACCA   |     |     |     |      | [685] |
| Myotis       | AGGAGCATCTGCTATAGAACCCTCAGATAGCACAAAGAGTGTCCCTCACAA  |     |     |     |      | [685] |
| Tadarida     | AGGAGCATCTGCTATAGAACCCTCAGATAACCAAAAGATGTCCCTCACAA   |     |     |     |      | [679] |
| Taphozous    | AGGAGCACCTACTATACAATCTCAGATAACCAAAAATTGTCCCTCACAG    |     |     |     |      | [685] |
| Megaderma    | AGGAGCATCTGCTGTAGAACCCTCAGATAATACAAGAGTGTCTCCTCATAA  |     |     |     |      | [700] |
| Cynopterus   | AAGAGCATCTGCTACAGAACCCTCAGATAACCAAAAGAGTGTCCCTCACAA  |     |     |     |      | [679] |
| Pteropus     | AGGAGCATCTGCTATAGAACCCTCAGATAACCAAAAGAGTATCCCTCACAA  |     |     |     |      | [676] |
| Hipposideros | AGGAGCATCTGCTGTAGAACCCTCAGATAACCAAAAGAGTGTCCCTCACAA  |     |     |     |      | [700] |
| Cat          | AGGAGCATGTGCTATAGAACCCTCAGATAACGCAAGCCTATCCCTCACAA   |     |     |     |      | [694] |
| Human        | AGGAGCATTTGTTACTGAGCCACAGATAATACAAGAGCGTCCCTCACAA    |     |     |     |      | [700] |
| Mouse        | AGGCACATTTATTACAGAACCACAGATAACCAAAAGAGCAGCCCTTCACAA  |     |     |     |      | [694] |
| Flyinglemur  | AGGAGCATTTGTTACTGAGCCACAGATAACCAAAAGAGCGTCCCTCACAA   |     |     |     |      | [700] |
| NycterisG    | AGTAACATCTGCTATAGAACCCTCAGGTAGTACAAAAGTGTCTGTACAAA   |     |     |     |      | [685] |
| Antrozous    | AGGAGCGTCTGCTATAGAACCCTCAGATAACCAAAAGAGTGTCCCTCAAAA  |     |     |     |      | [685] |
| Rhogeessa    | AGGAGCATCTGCTATAGAACCCTCAGATAACCAAAAAGTGTCCCTCAAAA   |     |     |     |      | [685] |
| Noctilio     | ????????????????????????????????????????????????     |     |     |     |      | [685] |
| Natalus      | AGGAGCATCTGCTATAGAACCCTCAGATAACCAAAAGAGTATCCCTCACAA  |     |     |     |      | [685] |
| Rhinolophus  | AGGAGCATCTGCTGTAGAACCCTCAGGTAAACCAAAAGAGTGTCCCTCACAA |     |     |     |      | [697] |
| Rousettus    | AGGAGCATCTGCTATAGAACCCTCAGATAACCAAAAGAGTATCCCTCACAA  |     |     |     |      | [679] |
| NycterisT    | AGTAACATCTGCTATAGAACCCTCAGGTAGTACAAAAGGCTCTCTCACAA   |     |     |     |      | [685] |
| Nyctimene    | AGGAGCATCTGCTATAGAACCCTCAGATAACCAAAAGATATCCCTCACAA   |     |     |     |      | [676] |
| Mole         | AGGAGCATCTGTACAGAACCCTCAGATAAGTTCAAGAGCGTCCCTCACAA   |     |     |     |      | [697] |
| Horse        | AGGGGCATCTGCTATAGAACCCTCAGATTACCAAAAGAGCGTCCACTCACAA |     |     |     |      | [700] |
| Desmodus     | AGGAGCATCTGCCCCAGAGCCTTGGATAACCAAAAGAGCGTCCCTCACAA   |     |     |     |      | [685] |
| Rhinopoma    | AGGAACATCTGCTATAGAACCCTCAGATAACCAAAAGAGTGTCCCTCACAA  |     |     |     |      | [700] |
| Emballonura  | AGGAGCATCTGTTATAGAACCCTCAAAATAACAAAAGATGTCCCTCACAA   |     |     |     |      | [682] |
| Cow          | AGGCGCATTTACTGTAGAACCCTCAGATAACCAAAAGAGCAGCCCTCACAA  |     |     |     |      | [694] |
| Pangolin     | TGGAGCATTTGCAGTAGAACCTCAGATAACCAAAAGAGCGTCCCTCAGAA   |     |     |     |      | [700] |
| Whale        | AGGAGCATCTACTGTAGAACCCTCAGATAACCAAAAGAGCGCCCTCACAA   |     |     |     |      | [700] |

|              |                                                     |     |     |     |      |       |
|--------------|-----------------------------------------------------|-----|-----|-----|------|-------|
| [            | 710                                                 | 720 | 730 | 740 | 750] |       |
| [            | .                                                   | .   | .   | .   | .    | .]    |
| Tonatia      | ACAAACTAAAGCGTAAAAGGAGAAGTACACCGGGCCTTCACCCAGAGGAT  |     |     |     |      | [735] |
| Myotis       | ATAAACTAAAGCGTAAAAGGAGAAGTACATC?GGCCTTCATCCTGAGGAT  |     |     |     |      | [735] |
| Tadarida     | ATAAACTAAAGCGTAAAAGAAGA---ACATCAAGCCTTCATCCTGAGGAT  |     |     |     |      | [726] |
| Taphozous    | ATAAACTAAAGCATAAAAGAAGAACTACATCAGGCCTTCGTCTGAGGAT   |     |     |     |      | [735] |
| Megaderma    | ATAAACTAAAGCGTAAAAGGAGAAGTACATCAGCCCTCCATCCTGAGGAT  |     |     |     |      | [750] |
| Cynopterus   | ATAAACTAAAGCGTAAAAGAAGAACTACATCAGGCCTTCATCCTGAGGAT  |     |     |     |      | [729] |
| Pteropus     | ATAAACTAAAGCGTAAAAGGAGAAGTACATCAGGCCTTCATCCTGAGGAT  |     |     |     |      | [726] |
| Hipposideros | ACAAACTAAAGCGTAAAGGGGAACTACGTACAGGCCTTCATCCTGAGGAT  |     |     |     |      | [750] |
| Cat          | ATAAAACAAAGCGTAAAAGGAGATCTACCGCAGGCCTTCATCCTGAGGAT  |     |     |     |      | [744] |
| Human        | ATAAATTAAGCGTAAAAGGAGACCTACATCAGGCCTTCATCCTGAGGAT   |     |     |     |      | [750] |
| Mouse        | ATAAATTAAGCGTAAAGAGAAGT---ACATCC---CTTCAACCTGAGGAC  |     |     |     |      | [738] |
| Flyinglemur  | ATAAGGTAAGCCTAAAAGGAGAAGTACATCAGGCCTTCATCCTGAGGAT   |     |     |     |      | [750] |
| NycterisG    | GTAAACTAAAGCGTAAAAGGAGAAGTACATCAGGCCTTCATCCTGAGGAT  |     |     |     |      | [735] |
| Antrozous    | ATAAACTAAAGCGTAAAAGAAGAACTACATCAGGCCTTCATCCTGAGGAT  |     |     |     |      | [735] |
| Rhogeessa    | ATAAACTAAAGCATAAAAGGAGAAGTACATCAGGCCTTCATCCTGAGGAT  |     |     |     |      | [735] |
| Noctilio     | ????????????????????????????????????????????????    |     |     |     |      | [735] |
| Natalus      | ATAAACTAAAGCGTAAAAGGAAAAGTACGTACAGGCCTTGATCCTGAGGAT |     |     |     |      | [735] |
| Rhinolophus  | ACAAACTGAGGCGTAAAGGAGAAGTACATCATGCCTGCATCCTGAGGAT   |     |     |     |      | [747] |
| Rousettus    | ATAAACTAAAGCGTAAAAGGAGAAGTACATCAGGCCTTCATCCTGAGGAT  |     |     |     |      | [729] |
| NycterisT    | GTAAACTAAAGCGTAAAAGGAGAAGTACATCAGGCCTTCACCTGAGGAT   |     |     |     |      | [735] |
| Nyctimene    | ATAAATTAAGCGTAAAAGGAGAAGTACATCAAGCCTTCATCCTGAGGAT   |     |     |     |      | [726] |
| Mole         | ATAGATTAAGCGTAAAAGGAGAAGTCTACCAGGCCTTTGTCTGAGGAT    |     |     |     |      | [747] |
| Horse        | ATAGAGTGAAGCATAAAAGGAGAAGTACATCAGGCCTTCATCCTGAGGAT  |     |     |     |      | [750] |
| Desmodus     | ATAAACTAAAGCGCAAGAGAAGTACCCAGGCCTTCAT---CCAGAGGAT   |     |     |     |      | [732] |
| Rhinopoma    | ATAAACTAAAGCGTAAAAGGAGAAGTACATCAGGCCTTCATCCTGAGGAT  |     |     |     |      | [750] |
| Emballonura  | ATAAACTGAAGCGTAAAAGGAGAAGTACATCAGGCCTTCATCCTGAGGAT  |     |     |     |      | [732] |
| Cow          | ATAAACTAAAATGTAAGGAGAGGTACATCAGGCCTTCAGCCTGAGGAT    |     |     |     |      | [744] |
| Pangolin     | ATAGAGTAAAGCGTAAAAGGAGAAGTACATCAGGCCTTCATCCTGAGGAT  |     |     |     |      | [750] |
| Whale        | ATAAACTAAAGCGTAAAAGGAGAAGTACATCAGGCCTTCATCCTGAGGAT  |     |     |     |      | [750] |

|          |                                                    |     |     |     |      |       |
|----------|----------------------------------------------------|-----|-----|-----|------|-------|
| [        | 760                                                | 770 | 780 | 790 | 800] |       |
| [        | .                                                  | .   | .   | .   | .    | .]    |
| Tonatia  | TTTATCAAGACAGTGGATTTGACCGTTGTCCAGAAGACTCCTGAGAAGAC |     |     |     |      | [785] |
| Myotis   | TTTATTAAGAAAGTAGATTTGGCAGTTGTTCAAAGACTCCTGAAGAGAT  |     |     |     |      | [785] |
| Tadarida | TTTATCAAGAAAGTAGATTTGGCAGTTGTTCAAAGACTCCTGAAAAGGT  |     |     |     |      | [776] |

|              |                                                           |       |
|--------------|-----------------------------------------------------------|-------|
| Taphozous    | TTTATCAAGAAGTAGATTTGGCAGCTGTTTCAGAAGACTCCTGAAAAGAT        | [785] |
| Megaderma    | TTTATCAAGAAAAGTAGATGTGGCAGTTGTTGAAAAGATTCTCGAGATAG        | [800] |
| Cynopterus   | TTTATCAAGAAAATAGATTTGACAACCTGTTCAAAAAACTTCTGAAAATAT       | [779] |
| Pteropus     | TTTATCAAGAAAATAGATTTGGCAGTTGTTTCAGAAAACCTCCGAAAACAT       | [776] |
| Hipposideros | TTTATCAAGAAAAGTAGATTTGACAGTTGTTCAAAAAGACTCCTGAAAAGAT      | [800] |
| Cat          | TTTATCAAGAAAAGTAGATTTGGCCATTGTTCAAAAAGACTCCTGAAAAGCT      | [794] |
| Human        | TTTATCAAGAAAAGTAGATTTGGCA--GTTCAAAAAGACTCCTGAAAATGAT      | [797] |
| Mouse        | TTCATCAAGAAAAGCAGATTCAGCAGGTGTTCAAAGGACTCCTGACAACAT       | [788] |
| Flyinglemur  | TTTATCAAGAAAAGCAGACTTGGCAGTTGTTCAAAAAACTCCTGAAAAGAT       | [800] |
| NycterisG    | TTTATCAAGAAAAGTAGATTTGGCAGTTGTTGAAAGGACTCCTGAAAAGAT       | [785] |
| Antrozous    | TTTATCAAGAAAAGTAGATTTGGCAGTTGTTCAAAAAGACTCCTGAAAGAT       | [785] |
| Rhogeessa    | TTTATCAAGAAAAGTAGATTTGGCAGTTGTTCAAAGGACTCCTGAAGAGAT       | [785] |
| Noctilio     | ?????????????????????????????????GTTTCAGAAGACTCCTGAAAAGAT | [785] |
| Natalus      | TTTATCAAGAAAAGTAGATTTGGCAGTTGTTCAAAGGACTCCTGAAAAGAT       | [785] |
| Rhinolophus  | TTTATCAAGAAAAGTAGATTTAGAAGTTGTTCAAAAAGACTCCTGAAAAGAT      | [797] |
| Rousettus    | TTTATCAAAAAATAGATTTGGCAATTGTTCAAAAAACTCCTGAAAACAT         | [779] |
| NycterisT    | TTTATCAAGAAAAGTAGATTTGGCAGTTGTTCAAAAAGACTCCTGAAAAGAT      | [785] |
| Nyctimene    | TTTATCAAGAAAATAGATTTGGCAATTGGCCAAAAAACTTCTGAAAACGT        | [776] |
| Mole         | TTTATCAAGAAAAGTAGATTTGGAAAGTTGTTTCAGAACACCCCTGAAAAGAT     | [797] |
| Horse        | TTTATCAAGAAAAGTAGATTTGGCAGTTGTTCAAAAAGACTCCTGAAAAGAT      | [800] |
| Desmodus     | TTTATCAAGAAAAGTAGATCTGCAGTTGATCAAAGGCTCCTGAAAAGAT         | [782] |
| Rhinopoma    | TTTATCAAGAAAATAGATTTGGCAATTGTTCAAAAAGACTCCTGAAAAGAT       | [800] |
| Emballonura  | TTTATCAAGAAGTAGAATTGGCAGTTGTTCAAAGGACTCCTGAAAAGAT         | [782] |
| Cow          | TTTATCAAGAAAAGTCGATTTGACAATTGTTCAAAAAGACTCCTGAAAAGAT      | [794] |
| Pangolin     | TTTATCAAGAAAAGTAGATTTGGAAAGTTGTTCAAAAAGACTCCTGAAAAGAT     | [800] |
| Whale        | TTTATCAAGAAAAGTCGATTTGGCAGTTATTGCAAAAGACTCCTGAAAAAAT      | [800] |

[ 810 820 830 840 850 ]  
[ . . . . . ]

|              |                                                       |       |
|--------------|-------------------------------------------------------|-------|
| Tonatia      | CATTGAGGGAAC TGACCAAACAGAACAGAACGGTCGTGTGATGGATATTG   | [835] |
| Myotis       | AAATTAAGGGAAC TGACCGAATAGAACAGAATGGTCATGAGATGAATATTA  | [835] |
| Tadarida     | AAATGAGGGAAC TGACCAAATAGAACAGAATGGTCATGTGATGAGTATTA   | [826] |
| Taphozous    | AAATGAGGGAAC TGATCAAACAGAACAGAATGGTTCTGTGATGAATATTA   | [835] |
| Megaderma    | AATCAAGGGAAC TGACCAAATAGAGCAGCATGGTCATGTGATGAATATTA   | [850] |
| Cynopterus   | AAATGAGGGAAC TGACCAAATAGAGCAGAATGGTCATGTGATGAATAGTT   | [829] |
| Pteropus     | AAATGAGGGAAC TGACCAAATAGAGCAGAATGGTCATGTGATGAATAGTA   | [826] |
| Hipposideros | AAATGAGGGAAC TGACCAAACAGAACAGAATGGTCATGTGATGAACATTA   | [850] |
| Cat          | AAATGAGGGAAC CGATCGAATAGGGCAAAATGGCCATGTGATGAATAGAA   | [844] |
| Human        | AAATCAGGGAAC TAACCAAACGGAGCAGAATGGTCAAGTGTGATGAATATTA | [847] |
| Mouse        | AAATCAGGGAAC TGACCTAATGGAGCCAAATGAGCAAGCAGTGAGTACTA   | [838] |
| Flyinglemur  | AAATCAGGGAAC TGACCAAATGGAGCAGAATGATCGAGTGTGATGAATATTA | [850] |
| NycterisG    | AAATGAGGGAAC TGACCAAATAGAAAACAATGGTCATGTGATAAATATTA   | [835] |
| Antrozous    | AAATGAGGGAAC CGACCGAATAGAACAGAATGGTCATGAGATGAATATTA   | [835] |
| Rhogeessa    | AAATGAGGGAAC CCGACCGAATAGAACAGAATGGTCATGAGATGAATATTA  | [835] |
| Noctilio     | AAATGAGGGAAC TGACCAAATAGAACAAAATGGTCATGTGATATCCATTA   | [835] |
| Natalus      | AATAGAGGGAAC TGACCGAATAGAACAGGATGGTCATGTGATGAATATTA   | [835] |
| Rhinolophus  | AAATGAGGGAAC TGACCAAACAGAGCAGAATGGTCACGTGATGAATATTA   | [847] |
| Rousettus    | AAATGAGGGAAC TGACCAAATAGAGCAGAATGGTCATGTGATGAATAGTA   | [829] |
| NycterisT    | AAATGAGGGAAC TGACCAAATAGAAAACAATGGTCATGTGATAAATATTA   | [835] |
| Nyctimene    | AAATGAGGGAAC TGACCAAATAGAACAGAATAGTCATGTGATGAATAGTA   | [826] |
| Mole         | AAGTCGGGAAC TGATCAAATGGATCAGAGTGGTCAAGTGTGATGATGTTG   | [847] |
| Horse        | AAATGAGGGAAC TGACCAAATAGAGCAGAACAGTCATGTGATGAATATTA   | [850] |
| Desmodus     | AAATGAGGGAAC TGACCAAATAGAACAGAATGGTCGTGTGATGGATATTA   | [832] |
| Rhinopoma    | AAATGAGGGAAC TGACCAAATAGAGCAGAATGGTCACGTGATGAATATTA   | [850] |
| Emballonura  | CATTGAGGGAAC TGACCAAACAGAACAGAATGGTCATGTGATGAATGTTA   | [832] |
| Cow          | GACGGAGGGAAC TGACCAAACAGAGCAGAAATGTGATGGGATGAATATTA   | [844] |
| Pangolin     | AAATGAGGGAAC CGACCAAATAGAGCAGAATGCTCTTCTGTGATGAATAGAA | [850] |
| Whale        | AACTGAGGGAAC TGACCAAACAGAGCAGAATGGTCATGGGATGCATGTTA   | [850] |

[ 860 870 880 890 900 ]  
[ . . . . . ]

|              |                                                      |       |
|--------------|------------------------------------------------------|-------|
| Tonatia      | CTAACAGTGGTCACGGGAATGAAGCAAAGGTGATTATGTTTCAGAATGAG   | [885] |
| Myotis       | CTAATAATGATCATGAGAATGAAAACAAAAGGTGATTGTGTTTCAGAAAGAG | [885] |
| Tadarida     | CTAGTAATGTGTCATGAGAATAAAACAAAAGGTGATTATGTTTCAGAAAGAG | [876] |
| Taphozous    | CTGATAATGGTCATGAGGATGAAACAAAATGTGATTATGGTCAGAAAGAG   | [885] |
| Megaderma    | CTAATTAATGGTCATGAGAATGAAACAAAAT-----                 | [879] |
| Cynopterus   | CTAATGATGGTCATGAGAATGAAACAAAAGGTGATTATGTTTCAGAAGAAG  | [879] |
| Pteropus     | CTAATAATGGTCATGAGAATGAAACAAAAGGTGATTATGTTTCAGAAGAAG  | [876] |
| Hipposideros | CTGATAATGGTCATGGGAATGAAACAAAAGGTGATTATGTTTCAGAAGAAG  | [900] |
| Cat          | CAATAATGGTCTGAGAATGGGACAAAAGGTGATTATGTTTCAGAAAGAG    | [894] |
| Human        | CTAATAGTGGTCATGAGAATAAAACAAAAGGTGATTCTATTTCAGAATGAG  | [897] |



|             |                                                      |         |
|-------------|------------------------------------------------------|---------|
| Mouse       | CCAGTAACTGTCAGGAGAACAAAATAGCAGGTAGTAATCTCCAGAAAGAG   | [ 888 ] |
| Flyinglemur | TTAATAGTGGTCATGAGAATGAAACAAAAGGATGATTATGTTTCAGAAAGAG | [ 900 ] |
| NycterisG   | CTAATAATGGTCGTGAGAATGAAACAAAACGGTGATTATGTTTCAGAAAGAG | [ 885 ] |
| Antrozous   | CTAATAATGGTCATGAGAATGAAACAAAAGGCGATTATGTGCAGAAAGAG   | [ 885 ] |
| Rhogeessa   | CTAATAATGGTCATGAGAATGAAACAAAAGGCGATTATGTTTCAGAAAGAG  | [ 885 ] |
| Noctilio    | CTAATAATAGTCAGGAAAATGAAACAAAAGGTGATTATGTTTCAGAAAGAG  | [ 885 ] |
| Natalus     | CTAATAATGGTCATGAGAATGAAACAAAAGGTCATCATGTTTCAGAAAGAG  | [ 885 ] |
| Rhinolophus | CTAATAATGGTCATGGGAATGAAACGAAAGGTGATTATGTTTCAGAAAGAG  | [ 897 ] |
| Rousettus   | CTAATAATGGTCATGAGAATGAAACAAAAGGTGATTATGTTTCAGAAAGAG  | [ 879 ] |
| NycterisT   | CTAATAATGGTCGTGAGAATGAAACAAAAGGTGATTATGTTTCAGAAAGAG  | [ 885 ] |
| Nyctimene   | CTAATAATGGTCATGAGAATGAAACAAAAGGCGATTATGTTTCAGAAAGAG  | [ 876 ] |
| Mole        | CTTATAATGGTCATGGGAATGAAACAAAACGTGATTATGTTTCAGAAAGAG  | [ 897 ] |
| Horse       | CTCCTAATGGTCATGGGAATGAAACAAAAGGCGATTATGTTTCAGAAAGAG  | [ 900 ] |
| Desmodus    | CTGATAATGGTCATGGGAATGAAACAAAAGGCGACTGTGTTTCAGAAAGAG  | [ 882 ] |
| Rhinopoma   | CTAATAATGGTCATGAGACTGAAACAAAAGGTGATTATGTTTCAGAAAGAG  | [ 900 ] |
| Emballonura | CTAATAACAGTCATGAGGATGAAACAAAAGGTGATTATGTTTCAGAAAGAG  | [ 882 ] |
| Cow         | CTAGTGATGGTCATGAGAATAAAACAAAACGTGATTATGTTTCAGAAAGAG  | [ 894 ] |
| Pangolin    | CAAATAACGGTCATAAGAATGAAACAAAAGGTGATTATGTTTCAGAAAGAG  | [ 900 ] |
| Whale       | CTAGTAATGGTCCTGAGACTGAAATGAAAGATGATTATGTTTCAGAAAGAG  | [ 900 ] |

[ 910 920 930 940 950 ]  
[ . . . . . ]

|              |                                                      |         |
|--------------|------------------------------------------------------|---------|
| Tonatia      | AAGAGTTCTGACCCAACAGAATCACTGGGAGAAGAACCCGCTTTCAGAAC   | [ 935 ] |
| Myotis       | AAAAATGCTAACCTAACAGAATCACTGGAAAAAGAATCTGCGTTCACAAG   | [ 935 ] |
| Tadarida     | AAAAATCTAACCCAACAGAATCATTGGAAAAAGAATCTGCTTTCACAAC    | [ 926 ] |
| Taphozous    | AAAAATGCTAACCCAGCAGAATCATTGGAAAAAGAATCTGCTTTCAGAAC   | [ 935 ] |
| Megaderma    | -----GCTCACTCAACAGAATCACTGGACAAAAGAATCTGCTTTTAGAAC   | [ 923 ] |
| Cynopterus   | AAAAATACAAACCCAACAGAATCATTGGAAAAAGAATCTGCTTTCAGAAC   | [ 929 ] |
| Pteropus     | AAAAATACAAACCCAACAGAATCATTGGAAAAAGAATCTACTTTCAAAAC   | [ 926 ] |
| Hipposideros | GATAATGCTAACCCAACAGAATCATTGGAAAAAGAATCTGCTTTCAGAAC   | [ 950 ] |
| Cat          | AAAAATGCTAAGCCAACAGAATCATTGGAAAAAGAATCTGCTTTTAGAAC   | [ 944 ] |
| Human        | AAAAATCCTAACCCAATAGAATCACTCGAAAAAGAATCTGCTTTCAAAAC   | [ 947 ] |
| Mouse        | AAAAGCGCTCATCCAATGAATCATTGAGAAAAGGAACCTGCTTCCACAGC   | [ 938 ] |
| Flyinglemur  | AAAAATGCTAACCCAACAGAATCATTGGAAAAAGAATCTGCTTTCAGAAC   | [ 950 ] |
| NycterisG    | AAAGACTAACCCAATAGAATCATTGGAAAAAGAATCTGCTTTCAGAAC     | [ 935 ] |
| Antrozous    | AAAATGCTCACCTAACAGAATCATTGGAAAAAGCATCTGCTTTCACAAC    | [ 935 ] |
| Rhogeessa    | AAAAATGCTAACCTAACAGAATCATTGGAAAAAGCATCTGCTTTCACAAC   | [ 935 ] |
| Noctilio     | AAAAATACTAACCGCAGCAGAATCATTGGAAAAAGAATCTACTTTTAGAAC  | [ 935 ] |
| Natalus      | AAAAACGCTAACCCAACAGAATCAATGGAAAAAGAACCTGCTTTCACAAC   | [ 935 ] |
| Rhinolophus  | AATGATGCTAACCCAACAGAATGTTGGAAAAAGAATCTGCTTTCAGAAAC   | [ 947 ] |
| Rousettus    | AAAAATACAAACCTAACAGAATCATTGGAAAAAGAATCTGCTTTCAAAAC   | [ 929 ] |
| NycterisT    | AAAAACACTAACCTCAATAGAGTCATTGGAAAAAGAATCTGCTTTCAGAAC  | [ 935 ] |
| Nyctimene    | AAAAATACAAACCCAACAGAATCATTGGAAAAAGAATCTGCTTTCAGAAC   | [ 926 ] |
| Mole         | AAAAGTGCTAACCCAGCGAATCTTTAGAAAAAGAATCTACTTTCAGAAT    | [ 947 ] |
| Horse        | AAAACGCTTACCTAACAGAATCATTGGAGACAGAATCTGCTTTCAGAAC    | [ 950 ] |
| Desmodus     | AAAAATGCTAACCCAACAGAATCACTGGGAAAAAGAATCTGCTTTCAGAAAC | [ 932 ] |
| Rhinopoma    | AAAAATGCTAACCCAACAGAATCATTGGAAAAAGAATCTGCTTTCAGAAC   | [ 950 ] |
| Emballonura  | AAAAGTGCTAACCCAACAGAATCATTGGAAAAACACTCTGCTTTCAGAAC   | [ 932 ] |
| Cow          | CAAACGCTAACCCAGCAGAATCATTGGAAAAAGAATCTGTTTTCAGAAC    | [ 944 ] |
| Pangolin     | AAAAATGCTAACCCAACAGAATCATTGAAAAAGAACCTGCTTTCAGAAC    | [ 950 ] |
| Whale        | AAAAATGCTAACCTAACAGAGTCATTGGAAAAACAATCTGCTTTCAGAAC   | [ 950 ] |

[ 960 970 980 990 1000 ]  
[ . . . . . ]

|              |                                                      |          |
|--------------|------------------------------------------------------|----------|
| Tonatia      | TAAAGCTGGACCTATAAGCAGCAGCATAAGCACCGTGGGACTAGAATTGA   | [ 985 ]  |
| Myotis       | TAAAGCTGAACCTATAAGCAGCAGCATAAGCAATATGGAAC TAGAATTAA  | [ 985 ]  |
| Tadarida     | TAAAGCTGAACCTATAAGCAGCAGCATAAGCAATATGGAAC TAGAATTAA  | [ 976 ]  |
| Taphozous    | TAAAGCTGAACCTATAAGCAGCAGCATAAGCAATATGGAAC TAGAATTAA  | [ 985 ]  |
| Megaderma    | TAAAGCTGAACCTATAAGCAGCAGTATAAGTAATATGGAAC TAGAATTAA  | [ 973 ]  |
| Cynopterus   | TAAAGTTGAGTCTGTACCCAACAACATAAGCAATGTGGAAC TAGAATTAA  | [ 979 ]  |
| Pteropus     | TAAAGCTGAACCTATAATGCAGCAGCATAAGCAATATGGAAC TAGAATTAA | [ 976 ]  |
| Hipposideros | TAAAGCTGAACCTATAAGCAGCAGTATAAGCCATATGGAAC TAGAATTAA  | [ 1000 ] |
| Cat          | CAAAGCTGAACCAATAAGCAGCAATATAAGTAATATGGAATCAGAATTAA   | [ 994 ]  |
| Human        | GAAAGCTGAACCTATAAGCAGCAGTATAAGCAATATGGAAC TAGAATTAA  | [ 997 ]  |
| Mouse        | AGGAGCCAAATCTATAAGCAACAGTGAAGTGAATTTGGAGGTAGAATTAA   | [ 988 ]  |
| Flyinglemur  | TAAAGCAGAACCTATAAGCAGCAGTATAAGCAATATGGAAC TAGAATTAA  | [ 1000 ] |
| NycterisG    | TAAAGCTGAACCTATAAGCAGCAGCATAAGCAATATGGAAC TAGAATTAA  | [ 985 ]  |
| Antrozous    | TGACACTGAACCTATAAGCAGCAGCATAAGCAATATGGAAC TAGAATTAA  | [ 985 ]  |
| Rhogeessa    | TGAAACGGAACCTATCAGCAGCAGCATAAGCAATATGGAAC TAGAATTAA  | [ 985 ]  |
| Noctilio     | TAAAGCTGAACCTATAAGCAGCAGCATAAGCAATATGGAAC TAGAATTAA  | [ 985 ]  |
| Natalus      | TAGAGCTGAACCTATAAGCAGCAGCATAAGCAATATGGAAC TAGAATTAA  | [ 985 ]  |

|             |                                                      |          |
|-------------|------------------------------------------------------|----------|
| Rhinolophus | TGTAGCCGAACCTATAAGCAGCAGTATAAGCAATATGGAAC TAGAATTAA  | [ 997 ]  |
| Rousettus   | TAAAGCTGAACCTATAACGAGCAGCATAAGCAATATGGAAC TAGAATTAA  | [ 979 ]  |
| NycterisT   | TAAAGCTGAACCTATAAGCAGCAGCATAAGCAATATGGAAC TAGAATTAA  | [ 985 ]  |
| Nyctimene   | TAAAGCTGAACCTATAACACAGCAGCATAAGCAATATGGAAC TAGAATTAA | [ 976 ]  |
| Mole        | TAAAGCTAAGCCATAAGTAGCAGTATAAGCAATATGGAAC TAGAATTAA   | [ 997 ]  |
| Horse       | TAAAGCTGAACCTATAAGCAGCAGCATAAGCAATATGGAAC TAGAATTAA  | [ 1000 ] |
| Desmodus    | TAAAGCTGAACCTATAAGCAGCAGCATAAGCAATATGGAAC TAGAATTAA  | [ 982 ]  |
| Rhinopoma   | TAAAGCTGAACCTATAAGCATTAGTATAAGCAATATGGAAC TAGAATTAA  | [ 1000 ] |
| Emballonura | TAAAGCTGAACCTAGAAGCAGCAGCATAAGCAATATGGATCTAGAATTAA   | [ 982 ]  |
| Cow         | TGAGGCTGAACCTATAAGCATCAGTATAAGCAATATGGAAC TAGAATTGA  | [ 994 ]  |
| Pangolin    | TAGAGCTGAACCTATAACCAGCAATATAAGCAATATGGAGCTAGAATTAA   | [ 1000 ] |
| Whale       | TAAGCCTGAACCTATAAGCAGCAGTATAGGCAATATGGAAC TAGAATTGA  | [ 1000 ] |

[ 1010 1020 1030 1040 1050 ]  
[ . . . . . ]

|              |                                                     |          |
|--------------|-----------------------------------------------------|----------|
| Tonatia      | ATGTCCACGGTTCAAAAGCGCCAGGAAGACTAAGCGGAGGGAGAAGACT   | [ 1035 ] |
| Myotis       | ATGTCCACAGTTCAAAAGCACCTAAGAAGAATAGGCTGAAGAGGAAGTCC  | [ 1035 ] |
| Tadarida     | ATATCCACAGTTCAAAAGCACCTAAGAAGAATAGGCTGAAGAGGAAGTCC  | [ 1026 ] |
| Taphozous    | ATATCAACAGTTCAAAAGCACCTAAGAAGAATAGACTGAGGAGGAAGTCC  | [ 1035 ] |
| Megaderma    | ATATCCACAGTTCAAAAGCACCTAAGAAGAATAGGCTGAGGAGGAAGTCC  | [ 1023 ] |
| Cynopterus   | ATATTCACGGTTCAAAAGCACCTCAAGAAGAATAG?CTGAGGAGGAAGTCC | [ 1029 ] |
| Pteropus     | ATATCCACAGTTCAAAAGCAGTTAAGAAGAATAGGCTGAGGAGGAAGTCC  | [ 1026 ] |
| Hipposideros | ATATCCATAGTTCAAAAGCACCTAAGAAAAATAGGCTGAGGAGGAAGTCC  | [ 1050 ] |
| Cat          | ATAGCCACAGTTCAAGGGCACCTAAGGAGAACAGGCTGAGGAGGAAGTCC  | [ 1044 ] |
| Human        | ATATCCACAATTCAAAAGCACCTAAAAAGAATAGGCTGAGGAGGAAGTCT  | [ 1047 ] |
| Mouse        | ACGTCCACAGTTCAAAAGCACCTAAGAAAAATAGGCTGAGGAGGAAGTCT  | [ 1038 ] |
| Flyinglemur  | ATATCCACAATTCAAAACCATCTAAGAAGAATAGGCTGAGGAGGAAGTCC  | [ 1050 ] |
| NycterisG    | ATATCTGCAGTTCAAAAGCACCTAAGAAGAATAGGCTGAGGAGGAAGTCC  | [ 1035 ] |
| Antrozous    | ATGTCCATAGGTCAAAAGCACCTAAGAAGAATAGGATGAAGAGGAAGTCC  | [ 1035 ] |
| Rhogeessa    | ATGTCCACAGTTCAAAAGCACCTAAGAGGAATAGGCTGAAGAGGAAGTCC  | [ 1035 ] |
| Noctilio     | ATATCCATAGTTCAAAACCACCAAGAAAACTAAACTGAGGAGAAAAGACA  | [ 1035 ] |
| Natalus      | ATGTCCACAGTTCAAAAGCACCTAAGAAGAATAGGCAGAGGAGGAAGTCC  | [ 1035 ] |
| Rhinolophus  | ATATCCACAGTTCAAAAGCACCTAAGAAGAATAGGCTGAGGAGGAAGTCC  | [ 1047 ] |
| Rousettus    | ATATCCACAGTTCAAAAGCACCTAAG?????????????GGAGGAAGTCT  | [ 1029 ] |
| NycterisT    | ATATCTGCAGTTCAAAAGCACCTAAGAAGAATAGGCTGAGGAGGAAGTCC  | [ 1035 ] |
| Nyctimene    | ATATCCACAGTTCAAAAGCACCTAAGAAGAATAGGCTGAGGAGGAAGTCC  | [ 1026 ] |
| Mole         | ATATCCACTCTTCAAAAGCACCTAAGAAGAACAGGCTGAGGAGGAAGTCT  | [ 1047 ] |
| Horse        | ATATCCACAGTTCAAAAGCACCTAAGAAGAATAGGCTGAGGAGGAAGTCT  | [ 1050 ] |
| Desmodus     | ATATCCATGGTTCAAAAGCACCAAGAAGACTAAGCCAAGGAAGAAGACC   | [ 1032 ] |
| Rhinopoma    | ATATCCACAGTTCAAAAGCACCTAAGAAGAATAGGCTGAGGAGGAAGTCC  | [ 1050 ] |
| Emballonura  | ATATCCACAGTTCAAAACCACCTAAGAAAAATAGGCTGAGGAGGAAGTCC  | [ 1032 ] |
| Cow          | ATATCCACCGTTCAAAAGCACCTAAG---AATAGGCTGAAGAGAAAAGTCC | [ 1041 ] |
| Pangolin     | ATATCCATAGTTCAAAAGTACTTAAGAAGAATAGGCTGAGGAGGAAGTCT  | [ 1050 ] |
| Whale        | ATATCCATAGTTCAAAAGCACCTAAA---AATAGGCTGAGGAGGAAGTCC  | [ 1047 ] |

[ 1060 1070 1080 1090 1100 ]  
[ . . . . . ]

|              |                                                      |          |
|--------------|------------------------------------------------------|----------|
| Tonatia      | GCTGCCGAGCATACTTATGCACCTGGACTCGGGTTCAGCAAGAGCCCGAG   | [ 1085 ] |
| Myotis       | TCTACCAGGCCTATTCATGCACCTTGAAGTAGTAGTCAATAGAAATCCGAG  | [ 1085 ] |
| Tadarida     | TCTACCAGGCACATTTATGCACCTTGAAGTAGTAGTCAATAGAAATCCAAG  | [ 1076 ] |
| Taphozous    | TCTACCAGGCATATTTATGCACCTTGAAGTAGTAGTCAATAGAAATCCAAG  | [ 1085 ] |
| Megaderma    | TCTACAAGGCATATTCATGCACCTTGAAGTAGTAGTCAATAGAAATCCAAG  | [ 1070 ] |
| Cynopterus   | T?TACCAGGCATATTCATGCACCTTGAAGTAGTAGTCAATAGAAATCCAAG  | [ 1079 ] |
| Pteropus     | TCTACCAGGCATATTCATGCACCTTGAAGTAGTAGTCAATAGAAATCCAAG  | [ 1076 ] |
| Hipposideros | TCTACCAGGCCTATTCATGCACCTTGAAGTAGTAGTCAAGTGGAAATCCACG | [ 1100 ] |
| Cat          | TCTACCAGGCACATGCGTGCCTGGAATTAGTAGTCAATAGAAATCCAAG    | [ 1094 ] |
| Human        | TCTACCAGGCATATTCATGCCTTGAAGTAGTAGTCAAGTGGAAATCCAAG   | [ 1097 ] |
| Mouse        | TCTACTAGGTGTGCTCTTCCACTTGAACCA---ATCAGTAGAAATCCAAG   | [ 1085 ] |
| Flyinglemur  | TCTACTAGGCATATTCATGCACCTTGAAGTAGTAGTCAATAGAAATCCAAG  | [ 1100 ] |
| NycterisG    | TGTACCAGGCATATTTGTGCACCTTGAAGTAGTAGTCAATAGAAATCCAAC  | [ 1085 ] |
| Antrozous    | TCTACCAGGCATATTTGTGCACCTTGAAGTAGTAGTCAATAGAAATCCAAG  | [ 1085 ] |
| Rhogeessa    | TCTACCAGGCATATTTGTGCACCTTGAAGTAGTAGTCAATAGAAATCCAAG  | [ 1085 ] |
| Noctilio     | TCTTCCAAACACATTTATGCTCTTGAAGTAGTAGTCAATAGAAATCCAAG   | [ 1085 ] |
| Natalus      | TCTACCAGGCATATTTATGCACCTTGAAGTAGTAGTCAATAGAAATCCAAG  | [ 1085 ] |
| Rhinolophus  | TCTACCAGGCCTATTCATGCACCTTGAAGTAGAGTCAAGTGGAAATCCAAG  | [ 1097 ] |
| Rousettus    | TCTACCAGGCATATTCATGCACCTTGAAGTAGTAGTCAATAGAAATCCAAG  | [ 1079 ] |
| NycterisT    | TGTACCAGGCATATTTGTGCACCTTGAAGTAGTAGTCAATAGAAATCCAAG  | [ 1085 ] |
| Nyctimene    | TCTACCAGGCATATTCATGCACCTTGAAGTAGTAGTCAATAGAAATCCAAG  | [ 1076 ] |
| Mole         | TCTACCAAGCATATTCATGCACCTTGAAGTAGGTTGTTCAAAAGAATCCAAG | [ 1097 ] |
| Horse        | TGTACCAAGCAGATTCATGCACCTTGAAGTAGTAGTCAAGTAAAAATCCAAG | [ 1100 ] |
| Desmodus     | ACTACCAGGCATATTTATGCACCTTGAAGTAGTAGTCAAGTAAAAATCCAAG | [ 1082 ] |

|             |                                                     |        |
|-------------|-----------------------------------------------------|--------|
| Rhinopoma   | TCTACCAGGCATATTCATGCACTTGAACATA---GTCAGTAGAAATCCAAG | [1097] |
| Emballonura | TCTACCAGGCATATTTATGCACTTGAACATAGTAGTCAGTAGAAATCCAAG | [1082] |
| Cow         | TCTACCAGGAAAATTCCTGAACTTGAACATAGTAGTCAGTAGAAACCCAAG | [1091] |
| Pangolin    | TCTACCAGGCACATTCATGCACTTGAACATAGTAGTCAATAGAAATCCAAG | [1100] |
| Whale       | TCTACCAGGAAGATTCATGCACTTGAACATAGTAGTCAGTAGAAACCCAAG | [1097] |

[ 1110 1120 1130 1140 1150 ]  
[ . . . . . ]

|              |                                                     |        |
|--------------|-----------------------------------------------------|--------|
| Tonatia      | CCCCCTGCTCACGCCGACTGCGGACGGACGGTTGTTCTGGCGGCGAGG    | [1135] |
| Myotis       | CCCATCTAACCACTACTGAACTACAAAATGATAGTTGTTCTAGCAGTGAAG | [1135] |
| Tadarida     | CCCACCTAATCACACTGAACTACAAAATGATAGCTGTTCTAGCAGTGAAG  | [1126] |
| Taphozous    | CCCACCTAATCATATTTGAACTACAAAATGATAGTTGTTCTAGCAGTGAAG | [1135] |
| Megaderma    | CCCACCTAATCATACTGAACTACAGATTGATAGTTGTTCTAGCAATGAAG  | [1120] |
| Cynopterus   | CCCACCTAATCATACTGAACTACAAAATGATAGTTGTTCCAGCAGTGAAG  | [1129] |
| Pteropus     | CCCACCTAATCATACTGAACTACAAAATGATAGTTGTTCTAGCAGTGAAG  | [1126] |
| Hipposideros | CCCACCTAGTCAGACTGAGCTACAAAATGATAGTTGTTCTAGCAGTGAAG  | [1150] |
| Cat          | CCCACCTAGTCATACCGAACTACAGATTGATAGTTGTTCTAGCAGTGAAG  | [1144] |
| Human        | CCCACCTAATTTGACTGAATTGCAAATGATAGTTGTTCTAGCAGTGAAG   | [1147] |
| Mouse        | CCCACCTACTTGTCTGAGCTTCAAATCGATAGTTGTTGGTAGCAGTGAAG  | [1135] |
| Flyinglemur  | CCCACCTAATTTACTGAACTACAAAATGATAGTTGTTCTAGCAGTGAAG   | [1150] |
| NycterisG    | CCCACCTAATCATACTGAACTACAAAATGATAGCTGTTCCAGTAGTGAAG  | [1135] |
| Antrozous    | CCCATCTAACCAATATTGAACTACAAAATGATAGTTGTTCTAGCAGTGAAG | [1135] |
| Rhogeessa    | CCCATCTAACCAATATTGAACTACAGATTGATAGTTGTTCTAGCAGCGAAG | [1135] |
| Noctilio     | CCCACCTACTCATACTGAACTACGAATTGATAGTTGTTCTAGCAGTGAAG  | [1135] |
| Natalus      | CCCACCTAATCATACTGAACTACAAAATGATAGCTGTTCTAGCAGTGAAG  | [1135] |
| Rhinolophus  | CCCAGGTAATCGTACTGAACTAGAAAATGATAGTTGTTCTAGCAGTGAAG  | [1147] |
| Rousettus    | CCCACCTAATCATACTGAACTACAAAATGATAGTTGTTCTAGCAGTGAAG  | [1129] |
| NycterisT    | CCCACCTAATCATACTGAACTACAAAATGATAGCTGTTCCAGTAGTGAAG  | [1135] |
| Nyctimene    | CCCACCTAATCATACTGAACTACAAAATGAAAGAGCTGAAGAGCAGTGAAG | [1126] |
| Mole         | CCCACCTAATCATACAGAACTACAAAATGATAGCTGTTCTAGCAGTGAAG  | [1147] |
| Horse        | CCCACCTAATCATACTGAACTACAAAATCGATAGTTGTTCTAGTAGTGAAG | [1150] |
| Desmodus     | CCCACCTACTCATACTGAACTACAAAATGATAGTTGTTCTAGCAGTGAAG  | [1132] |
| Rhinopoma    | CCCACCTAATCATACTGAACTACAAAATGATAGTTGTTCTAGCAGTGAAG  | [1147] |
| Emballonura  | TCCACCTAATCATACTGAACTAAAATGATTGTTGTTCTAGCAGTGAAG    | [1132] |
| Cow          | TCTACCTAATCATACTGAGCTACCAATTGATAGCAGTTCTAGCAATGAAG  | [1141] |
| Pangolin     | CCCCCTAACATACTGAACTACAAAATGATAGTTGTTCTAGCAGTGAAG    | [1150] |
| Whale        | CCCACCTAATCATACTGAACTACAAAATGATAGTTGTTCTAGCAGTGAAG  | [1147] |

[ 1160 1170 1180 1190 1200 ]  
[ . . . . . ]

|              |                                                     |        |
|--------------|-----------------------------------------------------|--------|
| Tonatia      | AGGCAAAGATCGGGA---ATTCTGGGCAGAGCCAGCCAGGCGGAGCAGC   | [1182] |
| Myotis       | AGGTGAAGGAAAAA---ATTCTGACCAAATACCAGTCAGACACAGCAAG   | [1182] |
| Tadarida     | AGGTGAAGGAAAAA---ATTCTGACCAAATACCAGTCAGACACAGCAAA   | [1173] |
| Taphozous    | AGGTGAAGGAAAAA---ATTCTGACCAAATACCAGTCAGGACAGCAAA    | [1182] |
| Megaderma    | AGGTGGAAGAAAAA---ACTCTGACCAAATGCCAGCCAGACACAACAAA   | [1167] |
| Cynopterus   | AACTGAAGGAAAAA---ATTCTGACCGAATGCCAGACAGACACAGCAAA   | [1176] |
| Pteropus     | AGTGAAGGAAAAA---ATTCTGACCAAATGCCAGTCAGACACAGCAAA    | [1173] |
| Hipposideros | AGGTGAAGGAAAAA---TTTCTGACCAAGTCCAGTCACACACAGCAAA    | [1197] |
| Cat          | AGATGGTGAAGAAAAAAGTTTCGGAACAAAATGCTAGTCAGACACAGCAAA | [1194] |
| Human        | AGATAAAGAAAAA---AGTACAACCAAATGCCAGTCAGGACAGCAGA     | [1194] |
| Mouse        | AAACAAAGAAAAAACC---ATTCCAACCAACAGCCAGCCGGGCACCTTAGA | [1182] |
| Flyinglemur  | AAATAGAGAAAAA---ATTCTGACCAAATGCCAGTCAGGACAGCAGA     | [1197] |
| NycterisG    | AGGTCAAGAAAAAGA---ATTCTGACCAAATACCAGTTGGGCACAGCAAA  | [1182] |
| Antrozous    | AGGTGAAGGAAAAA---ATTCTGACCAAATACCAGTCAGACACAGAAAG   | [1182] |
| Rhogeessa    | AGGTGAAGGAAAAA---ATTCTGACCAAATACCAGTCAGACACAGAAAG   | [1182] |
| Noctilio     | AGGTGAAGGAAAAA---ATTCTGACCAAATACCAGCAAGACACAGCAAA   | [1182] |
| Natalus      | AGGTGAAGGAAAAA---ATTCTGACCAAATACGAGTCAGACACAGCAAA   | [1182] |
| Rhinolophus  | AGGTAAAGAAAAA---ATTCTGACCAAATCCAGTCAGGACAGGAAAA     | [1194] |
| Rousettus    | AGCTGAAGGAAAAA---ATTCTGACCAAATGCCAGTCAGACACAGCAAA   | [1176] |
| NycterisT    | AGGTCAAGAAAAAGA---ATTCTGACCAAATACCAGTTGGGCACAGCAAA  | [1182] |
| Nyctimene    | AGCTGAAGGAAAAA---AATCTGACCAAATGCCAGTCAGACACAGCAAA   | [1173] |
| Mole         | AGATGAAGGAAAAA---ATTCCAACCAAATGCCAGTAAGACACAGCAAA   | [1194] |
| Horse        | AGATGAAGGAAAAA---ATTCTGACCAAATGCCGGTCAGACACAGCAAA   | [1197] |
| Desmodus     | AGGCGAAGAAAAA---ATTCTGAGCAAATACCAGTCAGACAGAGCAAA    | [1179] |
| Rhinopoma    | AGGTAAAGGAAAAA---ATTCTGACCAAATGCCAGTCAGACACAACAAA   | [1194] |
| Emballonura  | AGGTAAAGGAAAAAGA---ATTCTGACCAAATACCAATCAGGACAGCAAA  | [1179] |
| Cow          | AGATGAAGAAAAAAC---ATTCTAGCCAAATGCCAGTCAGGACAGGCCAA  | [1188] |
| Pangolin     | AGTTG---ATGAAA-----AACCAAATACCAGTCAAACAT?CCAAA      | [1188] |
| Whale        | AGATGAAGAAAAAAC---ATTCCAGCCAAATGCCAGTCAGGACAGGCAAA  | [1194] |

[ 1210 1220 1230 1240 1250 ]

[ . . . . . ]

|              |                                                     |        |
|--------------|-----------------------------------------------------|--------|
| Tonatia      | AAGCTTCCGCTCGAGGAGGGTCAAGGAGCTGCAGCTGGGGCCAGCAAGGG  | [1232] |
| Myotis       | AAGCTTCAACTCATGGAAGGTAAGAACCTGCAGCTGGAGCCAAGAAGAG   | [1232] |
| Tadarida     | AAGCTTCAACTCATGGAAGGTAAGAACCTGCAGCTGGAGCCAAGAAGAG   | [1223] |
| Taphozous    | GAGCCTCAACTCGTGAAGGTGAAGAACCTACGACTAGAGCCAAGAAGAA   | [1232] |
| Megaderma    | AATCTTCAACTTATAGAAGATAAAGAACCTGCAACTAGAGCTAAGAAGAG  | [1217] |
| Cynoapterus  | AACTTTCAGTTCGTAGAAGATAAAGAATCTGCAACTGGAGCCAAGAAGAA  | [1226] |
| Pteropus     | AACTTTCATTCATAGAAGATAAAGAATCTTCAACTGGAGCCAAGAAGAA   | [1223] |
| Hipposideros | ACGCTTGAACTCATAGAAGATCAAGAACCTGCAATGGAGTCAAGAAGAG   | [1247] |
| Cat          | ACACTTCAACTCGTGGAAAATAAAGAACCTGCACCTGGAGCCAAGAAGCG  | [1244] |
| Human        | AACCTACAACCTCATGGAAGGTAAGAACCTGCAACTGGAGCCAAGAAGAG  | [1244] |
| Mouse        | GAGCCTCAACTCATCGAAGACTGAACTGCAGCGGATGCCAAGAAGAA     | [1232] |
| Flyinglemur  | AAGCTTCAACTCATGAAAATAAAGAACCTGCAACTGGAGCCAAGAAGAG   | [1247] |
| NycterisG    | AACTTTCAGCCAGGGAAGGTAAGAAGCTGCAGCTGGAGCCAAGAAGAG    | [1232] |
| Antrozous    | AAGCTTCACTCATGGAAGGTAAGAACCTGCAATGGAGCCAAGAAGAG     | [1232] |
| Rhogeessa    | AACTTTCATTCATGGAAGGTAAGAACCTGAACTGGAGCCAAGAAGAG     | [1232] |
| Noctilio     | AAGCTTCAACTCATGGAAGGTAAGAACCTGCAACTGGAGCCAAGAAGAG   | [1232] |
| Natalus      | AAGCTTCAACTCATGGAAGGTAAGAACCTGCGACTGGGGCCAAGAAGAG   | [1232] |
| Rhinolophus  | AACTTGAACTCTTGAAGATAAAGAACCTGCAACTGGAGTCCAGAAGAG    | [1244] |
| Rousettus    | AACTTTCATTCGTAGAAGATAAAGAATCTGAACTGGAGCCAAGAAGAA    | [1226] |
| NycterisT    | AACTTTCAGCCAGGGAAGGTAAGAACCTGCAACTGGAACCAAGAAGAG    | [1232] |
| Nyctimene    | AACTTTCATTCATAGAAGATAAAGAATCTGCAACTGGAGCCAAGAAGAA   | [1223] |
| Mole         | AGCTTCAACTCATGGAAGATAAAGACCCGCAACTGAAGCCGTCAGAG     | [1244] |
| Horse        | AAGCTTCAACTCATGGAAGATAAAGAACCTGCCACTGGAGCCAAAAGAG   | [1247] |
| Desmodus     | AAGCTTCAACTCATGGAAGGTAAGAACCTGCAACTGGAGCCAAGAGGG    | [1229] |
| Rhinopoma    | AAGCTTCACTTATGGAAGATAAAGAACCTGTAACTGGAGCCAAGAAGAG   | [1244] |
| Emballonura  | GAGCTGCAACTCCTGGAAGGTGAAGAACCTGTGACTAGAGCCAAGGAGAA  | [1229] |
| Cow          | AAGCTTCAACTCATGGAGATAAAGAACCTTACTGCTGGAGCC---AAGAA  | [1235] |
| Pangolin     | AAGCTTCAACTCAAGGAGATAAGAGAACCTGCATCTAGAGCCAAGAAGAG  | [1238] |
| Whale        | AAGCTTCAATTCATGGGAGATAAAGCACCTACAACCTGGAGCCAAGAAGAG | [1244] |

[ 1260 1270 1280 1290 1300 ]  
[ . . . . . ]

|              |                                                     |        |
|--------------|-----------------------------------------------------|--------|
| Tonatia      | TGACCCGGTCAGATGCACCGATGAATAAGAGACTTGCCAATGATGCTTTTC | [1282] |
| Myotis       | TAATAAGTCAGATGAACAAATAAATAAAAACTTGCCAGTGATGCTTTTC   | [1282] |
| Tadarida     | TAACAAATCAAATGAACAAATAAATAAAAACTTGCCAGTGATGTTTTTC   | [1273] |
| Taphozous    | T---AAGTCAAATGAACAAATAAATAAAGACTTGCCAGTGATACTTTTC   | [1279] |
| Megaderma    | TAACAAGCCAGATGAACAAATAAATAAAGAGACTTACCAGTGATGCTTTTT | [1267] |
| Cynoapterus  | TAACATGCCAAATGAGGCAATAAATAAAGACTTTCAGTGAAAGCTTTTC   | [1276] |
| Pteropus     | TAACAAGCCAAATGAGACAATCAATAAAGACTTGCCAGTGATGCTTTTT   | [1273] |
| Hipposideros | GAACAAGCCAAATGAACAAATAAATAAAGACTTACCAGTAATGCTTTTC   | [1297] |
| Cat          | TAACAAGCCAAATGAACAAATAAATAAAGACTTGCCAGTAACACTTTTC   | [1294] |
| Human        | TAACAAGCCAAATGAACAGACAAGTAAAGACTGACAGCGATACTTTCC    | [1294] |
| Mouse        | C---GAGCCAAATGAACACATAAGGAAGAGACGTGCCAGCGATGCTTTCC  | [1279] |
| Flyinglemur  | TAACAAGCCAAATGAACAAATAAGTGAAGACATTCAGTAATGCTTTCC    | [1297] |
| NycterisG    | GAATAAGTCAAGTGAACAAATGAATAAAGACTTGCCAGTGATGCTTTTT   | [1282] |
| Antrozous    | TAATAAGTCAGATGAACAAAGTAAATAAAAACTTGCCAGTGATGCTTTTT  | [1282] |
| Rhogeessa    | TAATAAGTCAGATGAACAAAGTAAATAAAAACTTGCCAGTGATGCTTTTT  | [1282] |
| Noctilio     | TAACAAGTCAAATGAACAAATAAATAAAGACTTGCCAATGATGCTTTTT   | [1282] |
| Natalus      | TAACAAGTCAAATGAACAAATAAATAAAAACTTACCAGTGATGCTTTTT   | [1282] |
| Rhinolophus  | TAACAAGCCAAATGAACAAATAAATAAAGACTTACCAGTAATGCTTTCC   | [1294] |
| Rousettus    | TAACAAGCCACATGAGACAATAAATAAAGACTTGCCAGTGATGCTTTTT   | [1276] |
| NycterisT    | TAATAAGTCAAGTGAACAAATGAATAAAGACTTGCCAGTGATGTTTTTC   | [1282] |
| Nyctimene    | TAACAAGCCAAATGAGACAATAAATAAAGACTTGCCAGTGATGCTTTTT   | [1273] |
| Mole         | TAACAAGCCAAAAGAACA---ATTAAGACTTGCCAGTGATACTTTGC     | [1291] |
| Horse        | TAACAAGCCAAATGAACAAATAAATAAAGACTTGCCAGTGATGCTTTTT   | [1297] |
| Desmodus     | TAACAAGTCAAATGACCAATAAATAAAGACTTGCCAGTGAAGCTTTTT    | [1279] |
| Rhinopoma    | TCACAAGCCAAATGAACAAATAAATAAAGACTTACCATTGATGCTTTTT   | [1294] |
| Emballonura  | TAACAAGTCAAATGAACAAACAAACAAAGACTTGCCAGTGATGCTTTTT   | [1279] |
| Cow          | TAACAAAACATATGAACAAATAAATAAAGACTTGCTAGTGATGCTTTTT   | [1285] |
| Pangolin     | TAACAAGCCAAATGAACAAATAAATAAAGACTTACCAGTGACACTTTTT   | [1288] |
| Whale        | TAACAAGCCACAGCAAAATAAATAAAGACTTACCAGTGACGCTTATC     | [1294] |

[ 1310 1320 1330 1340 1350 ]  
[ . . . . . ]

|           |                                                    |        |
|-----------|----------------------------------------------------|--------|
| Tonatia   | CGGAACATAAATTTAACAAGCGTATCTGCCGTTTTACTAATGGTTCAAGT | [1332] |
| Myotis    | TAGAACAAAACCTAACAACATGCCTGGTGTTTTTACTAATGGTTAAGC   | [1332] |
| Tadarida  | CAGAACTAAACTTAACAACATACCTGGTTTTTTAAGTAATGATTCAGT   | [1323] |
| Taphozous | CAGAACTAAATTTAAAAAACATACCTGGTTTTTTACTAATGGTTCAAGT  | [1329] |
| Megaderma | CAGAACTAAATTTAACAACACACCTGGTTTTTTTACCAACAGTTCAAAAT | [1317] |

|              |                                                     |        |
|--------------|-----------------------------------------------------|--------|
| Cynoapterus  | CCGAATTAATATAACAAACGTACCTGGTTTTTTACTAATGGTTCAAGT    | [1326] |
| Pteropus     | CAGAATTAATATAACAAACATACCTGGTTTTTTACTAATGGTTCAAGT    | [1323] |
| Hipposideros | CAGAACTAAATTTAACAAACATACCTGGTATATTG---AACCGTTCAAGT  | [1344] |
| Cat          | CAGAGCTAAATTTAACAAACATACCTGGGGTTTTTTACTAATGGTTCAAGT | [1344] |
| Human        | CAGAGCTGAAGTTAACAAATGCACCTGGTCTTTTACTAAGTGTTCAAAT   | [1344] |
| Mouse        | CAGAAGAGAAATTAATGAACAAGCTGGTTTATTAAGTGTTCAGT        | [1329] |
| Flyinglemur  | CAGAAGCTGGTTAACAAATGTACCTGTTTTTTTGCTAAGTGTTCAGT     | [1347] |
| NycterisG    | CAGAACTAAATTTAACAAACACACCTGTTATTTTTTACTAATGGTTCAAGT | [1332] |
| Antrozous    | TAGAACTAACTTAGCAAACGTACCGGGTGTTTTTTACTAATAGTCAAGT   | [1332] |
| Rhogeessa    | TAGAACTAAGCTTAAAAAACATACCGGGTGTTTTTTACTAATGGTCAAGT  | [1332] |
| Noctilio     | CAGAACTTAATTTACCAAACATACCTTGTATTTTTTACTAATGGGTCAAGG | [1332] |
| Natalus      | TAGAAGTAAATTTAACAAACATACCTGGTTTTTTTAGTAAATGGTTCAAGT | [1332] |
| Rhinolophus  | CAGAACTAAATTTAACAAACATACCTGGTTTTTTTACTAATGGGTCAAGT  | [1344] |
| Rousettus    | CAGAATTAATATAACAAACATACCTGGTTTTTTTACTAATGGTTCAAGT   | [1326] |
| NycterisT    | CAGAACTAAATTTAACAAACACACCTGTTTTTACTAATGGTTCAAGT     | [1332] |
| Nyctimene    | CAGAATTAATATAACAAACATACCTGTTTTTTTACTAATGGTTCAAGT    | [1323] |
| Mole         | CAGAACTAAATTTAACAAACATGTACCTGGCTTCTTAGCAACTATTCAAGT | [1341] |
| Horse        | CAGAGCTAAATTTAACAAACATACCTGGTTTTTTTACTAATGGTTCAAGT  | [1347] |
| Desmodus     | CAGAACTAAATTTAACAAACATACCTGGTGTTTTTTAGTAGTGGTTCGAGT | [1329] |
| Rhinopoma    | CAGAACTAAAGTTAACAAACATACCTGGTTTTTTTACTAAGTTCAGT     | [1344] |
| Emballonura  | CAGAAATGAATTTAAAAAACATACCTGGTTTTTTTACTGATAGTTCAGT   | [1329] |
| Cow          | CAGAACTAAAGTTAACAAACACACCTGGTTATTTTTTACTAATGGTTCAGT | [1335] |
| Pangolin     | CAGAACTAAATTTAACAAACATACCTGGTTTTTTTACTAATGGTTCAGT   | [1338] |
| Whale        | CAGAACTAAATTTAACAAACATACCTGGTTTTTTTACTACATGTTCTAGT  | [1344] |

[ 1360 1370 1380 1390 1400 ]  
[ . . . . . ]

|              |                                                     |        |
|--------------|-----------------------------------------------------|--------|
| Tonatia      | TCTACTAAACTTAAAGAGTGTGTGATTCCTAACCTCAAGGAGAAGACAC   | [1382] |
| Myotis       | TCTAATAAGCTTAAACGAGTTTGTGATCCTAACCTACAAAGAGAAGAAAC  | [1382] |
| Tadarida     | TCTAATAAACTTAAAGAGTGTGTGATCCTAACCTTCAAAGAGAAGAAAT   | [1373] |
| Taphozous    | TCTAATAAACTTCAAGAGTGTGTGATCCTAACCTTCAAAGAGAAGAAAT   | [1379] |
| Megaderma    | TCTGATAAACTTAAAGAGTGTGTGATCCTAACCTTCAAAGAGAAGAAAT   | [1367] |
| Cynoapterus  | TCTAATAAACTTCAAGAGTGTGTGATCCTAACCTTCAAAGAGAAGAAAT   | [1376] |
| Pteropus     | TCTAATAAACTTCAAGAGTGTGTGATCCTAACCTTCAAAGAGAAGAAAT   | [1373] |
| Hipposideros | TCAAATAAACTTCAAGAGTGTGTGATCCTAACCTTCAAAGAGAAGAAAT   | [1394] |
| Cat          | TCTAATAAACTTCAAGAGTGTGTGATCCTAACCTTCAAAGAGAAGAAAT   | [1394] |
| Human        | ACCAGTGAACCTTAAAGAAATTTGTGATCCTAACCTTCAAAGAGAAGAAA  | [1394] |
| Mouse        | CCTAGAAAATCTCAAGGGCTGTCAATCCCAGCCCTCAGAGAACAGGAAC   | [1379] |
| Flyinglemur  | TCTAATAAACTTCAAGAAATTTATCGATCCTAACCTTCAAAGAGAAGAAAT | [1397] |
| NycterisG    | TCTAATAAACTTCAAGAGTGTGTGATCCTAACCTTCAAAGAGAAGAAAT   | [1379] |
| Antrozous    | TCTAATAAACTTCAAGAAATTTGTGATCCTAACCTTCAAAGAGAAGAAC   | [1382] |
| Rhogeessa    | TCTAATAAACTTCAAGAAATTTGTGATCCTAACCTTCAAAGAGAAGAAAC  | [1382] |
| Noctilio     | TCTAATAAACTTCAAGAGTGTGTGATCCTAACCTTCAAAGAGAAGAAAT   | [1382] |
| Natalus      | TCTAATAAACTTCAAGAGTGTGTGATCCTAACCTTCAAAGAGAAGAAAT   | [1382] |
| Rhinolophus  | TCAAATAAACTTCAAGAGTGTGTGATCCTAACCTTCAAAGAGAAGAAAT   | [1394] |
| Rousettus    | TCTAATAAACTTCAAGAGTGTGTGATCCTAACCTTCAAAGAGAAGAAAT   | [1376] |
| NycterisT    | TCTAATAAACTTCAAGAGTGTGTGATCCTAACCTTCAAAGAGAAGAAAT   | [1379] |
| Nyctimene    | TCTAATAAACTTCAAGAGTGTGTGATCCTAACCTTCAAAGAGAAGAAAT   | [1373] |
| Mole         | TCTAATAAACTTCAAGAGTGTGTGATCCTAACCTTCAAAGAGAAGAAAT   | [1391] |
| Horse        | TCTAATAAACTTCAAGAGTGTGTGATCCTAACCTTCAAAGAGAAGAAAT   | [1397] |
| Desmodus     | TCTACTAAACTTAAAGAAATTTGTGATCCTAACCTTCAAAGAGAAGACGT  | [1379] |
| Rhinopoma    | TCTAATAAACTTCAAGAGTGTGTGATCCTAACCTTCAAAGAGAAGAAAT   | [1394] |
| Emballonura  | TCTAATAAACTTCAAGAGTGTGTGATCCTAACCTTCAAAGAGAAGAAAC   | [1379] |
| Cow          | -----AAACCTGAAGAGTGTGTGATCCTAACCTTCAAAGAGAG-----    | [1374] |
| Pangolin     | TCTAATAAACTTCAAGAGTGTGTGATCCTAACCTTCAAAGAGAAGAAAT   | [1388] |
| Whale        | TCTAATAAACTTCAAGAGTGTGTGATCCTAACCTTCAAAGAGAG-----   | [1389] |

[ 1410 1420 1430 1440 1450 ]  
[ . . . . . ]

|              |                                                     |        |
|--------------|-----------------------------------------------------|--------|
| Tonatia      | AGAAGAGAACCGAGGAACAGTTCAGTGTCTAGTAGCACCAAAGACCTCA   | [1432] |
| Myotis       | AGAAGAGAACCTAGGAGCAGTTCAAATGTCTAATAGTACCAAAGACCTCG  | [1432] |
| Tadarida     | AACAGAGAACCTAGGAACAGTTCACATGTCTAATAGTACCAAAGACCTCA  | [1423] |
| Taphozous    | GGAAGAGAACCTAGGAACAATTCAGTGTCTGATAGTACCAAAGACCTCA   | [1429] |
| Megaderma    | AGAAGAGCATCTGGGAACGATTAAGAGTGTCTAATAGTACCAAAGACCTCA | [1417] |
| Cynoapterus  | AAAAGAGAATCTACGAACAATTCAGTGTCTAATAGTACCAAAGACCTCA   | [1426] |
| Pteropus     | AAAAGAGAACCTAGGAACAATTCAGTGTCTAATAGTACCAAAGACCTCA   | [1423] |
| Hipposideros | AGAAGAGAGCCTAGGAACAATTCAGTGTCTAATAGTACCAAAGACCTCA   | [1444] |
| Cat          | AGAAGAGAGCCGAGGAACGATTCACGTGTCTGATAGTACCAAAGACCTCA  | [1444] |
| Human        | AGAAGAGAACCTAGGAACAATTCAGTGTCTAATAGTACCAAAGACCTCA   | [1444] |
| Mouse        | A---GAGCAACTTGAACACGCCAAATGTCTGACAGTGCCAAAGAACTCG   | [1426] |
| Flyinglemur  | AGAAGAGAACCTAGGAACAATTCAGTGTCTAATAGTACCAAAGACCTCA   | [1447] |

|             |                                                      |        |
|-------------|------------------------------------------------------|--------|
| NycterisG   | AGAAGAGAACCTAGGGAAAATTCAAGTGTCTGATAGTACCAAAGACCCCA   | [1429] |
| Antrozous   | AGAAGAGACCATTGGACCCGGTTTCAAGTGCCTAATAGTCCCAAAGACCTCA | [1432] |
| Rhogeessa   | AGAAGAGAACCTAGGAACAGTTTCAAGTGCCTAATAGTACCAAAGACCTCA  | [1432] |
| Noctilio    | AGAACAGAACCCAGGGACAATTCAAGTGCCTAATAGTACCAAAGACCTCA   | [1432] |
| Natalus     | GGAAAGAGAACCTAGGAACAATTCAAGTGTCTAGTAGTACCAAAGAACTCA  | [1432] |
| Rhinolophus | AGAAGAGAACCTAGAACCAGTTCAAGTGTCTCATAGTACCAAAGACCTCA   | [1444] |
| Rousettus   | AAAAGAGAACCTAGGAACAATTCAAGTGTCTAATAGTACCAAAGACCCCA   | [1426] |
| NycterisT   | AGAAGAGAACCTAGGGAAAATTCAAGTGTCCGGTAGTACCGAAGACCCCA   | [1429] |
| Nyctimene   | AAAAGAGAACCTAGGAACAATTCAAGTGCCTAATAGTACCAAAGACCCCA   | [1423] |
| Mole        | AGAAGAGAACCTAGGAACAATTCAAGTGTCAAATAATACCAAAGACCCCA   | [1441] |
| Horse       | AGAACAGAACCTAGGAGCAAATCGACTGTCTAATAGTGCCAAAGACCCCA   | [1447] |
| Desmodus    | AGGAGAGAACCTAGGAACCATCAAGTGTGTAATAGCACCAAAGGCCTCA    | [1429] |
| Rhinopoma   | AGAAGAGAACCTAGGAACAATTCAAGTGTCTAATAGCACTCAAGACCCCA   | [1444] |
| Emballonura | AGAAGAGAACCTAGGAACAATTCAAGTGTCTAATAGTACCAAAGACCTCA   | [1429] |
| Cow         | ----GAGAACCTAGGAACAATTCAAGTGTGCGAATAGTACCAAAGACCCCA  | [1420] |
| Pangolin    | AGAAAATAATCTAGAAAACAATTCTA-----ACCAAAGACCCCA         | [1426] |
| Whale       | ----GAGAACCTAGGAAAAATTCAAGTGTGCGAATAGTACCAAAGACCCCA  | [1435] |

[ 1460 1470 1480 1490 1500 ]  
[ . . . . . ]

|              |                                                       |        |
|--------------|-------------------------------------------------------|--------|
| Tonatia      | AAGATCTGATATTCAAGTGGGGGAAGAAGTTTGCAA---ACTGACAGATCT   | [1479] |
| Myotis       | AAGATCTGACATTAAGTGGAGGAAGAAGTGTGCAA---ATTGATAGATCT    | [1479] |
| Tadarida     | AAGATCTGATATTAAAGTGGAGGAAGAAGTTTGCAA---ACTGATAGATCT   | [1470] |
| Taphozous    | AAGATCTGATATTAAAGTGGAGGAAGAAGTTTGCAA---ACTGATAGATCT   | [1476] |
| Megaderma    | AAGATCTGATACTAAGTGGAGGAAGAAGTTTGCAA---ACCGATCGTTCT    | [1464] |
| Cynopterus   | AAATTCTAATCTTTGGTGAAGGAAGAGGTTTCACAA---ACTGATCGATCT   | [1473] |
| Pteropus     | AAATTTTGATCTTCGGTGAAGGAAGAGGTTTCACAA---ACTGATCGATCT   | [1470] |
| Hipposideros | AAGATTTGATATCAAATGGGGGAAGAGGCTTGCAA---ACTGGTCAATCT    | [1491] |
| Cat          | AAGCGCTGGTATCGAGTGGAGGAAGAAGTTTGCAA---ACTGAAAAGATCT   | [1491] |
| Human        | AAGATCTCATGTTAAGTGGAGAAAAGGTTTTGCAA---ACTGAAAAGATCT   | [1491] |
| Mouse        | GGGATCGGGTCCCTAGGAGGAGAGCCCAAGTGGCAAAACCCTGACCGATCT   | [1476] |
| Flyinglemur  | AAGATTTGGTGTAAAGTGGGGGAAGAAGTTTGCAA---ACTGAAAAGATCT   | [1494] |
| NycterisG    | AAGATCTGATATTAAAGTGGGAAGAA---GTTTGCAA---ATTGATAGATCT  | [1473] |
| Antrozous    | AAGATCTGATATTAGATGGAGGAAGAAGTATGCAA---ACTGATAGGTCT    | [1479] |
| Rhogeessa    | AAGATCTGATATTAAATGGAGGAAGAAGTGTGCAA---ACTGATAGATCT    | [1479] |
| Noctilio     | AAGATCTGATATTAAAGTGGGAAGAA---GTTTGCAA---ACTGAAAAGATCT | [1476] |
| Natalus      | AAGATCTGATATTAAAGTGGGAAGAA---GTTTGCAA---ACTGAAAAGATCT | [1476] |
| Rhinolophus  | AAGATCTGCTATTAAAGTGGAGGAAGAAGTTTGCAA---ACTGATCAATCT   | [1491] |
| Rousettus    | AAATTCTGATCTTTGGTGAAGGAAGAGGTTTCACAA---ACTGATCGATCT   | [1473] |
| NycterisT    | AAGATCTGATATTAAAGTGGGAAGAA---GTTTACAA---ATTGATAGATCT  | [1473] |
| Nyctimene    | AAATTCTGATCTTCGGTGAAGGAAGAGGTTTCACAA---ACTGATCGATCT   | [1470] |
| Mole         | AAGATCCGATACCTTAGTGGACAAAGAGATTTGCAA---GCTGAAAAGATCT  | [1488] |
| Horse        | AAGATCTGATATTAAAGTGGAGAAAATGTTTGCAA---GCTGAAAAGATCT   | [1494] |
| Desmodus     | GAGATCTGATATTCAAGTGGAGGAAGAAGTCTGCAA---ACTGACAGGTCT   | [1476] |
| Rhinopoma    | AAGATCTGATATTAAAGTGGAGGAAGAAGTTTGCAA---ACTGATCGATCT   | [1491] |
| Emballonura  | AAGATCTGATATTAAAGTGGAGGAAGAAGTTTGCAA---ACTGAGATTTT    | [1476] |
| Cow          | AAGATCTGATATTAAAGGAAGAAAAGCTTTTGCAA---ATTGAAAAGATCT   | [1467] |
| Pangolin     | AAGATGTGATATTACATAGAGGA---GGTTTGCAA---ACTGAAAAGATGT   | [1470] |
| Whale        | AAGATCTGACATTAAGTGGAGGAAGAAGTTTGCAA---ATTGAAAAGATCT   | [1482] |

[ 1510 1520 1530 1540 1550 ]  
[ . . . . . ]

|              |                                                     |        |
|--------------|-----------------------------------------------------|--------|
| Tonatia      | GTGGAGAGTCCCAATATTG?ATTGGTACCTGAAACTGACTGTGACACTCA  | [1529] |
| Myotis       | AAAGAGAGTACCAATATTGTATTGGTACCTGAAACTGATTATGGCACACA  | [1529] |
| Tadarida     | ATGGAGAGTACCAATATTTTATTGGTACCTGAAACTGATTATGGCACGCA  | [1520] |
| Taphozous    | ATGGAGAGTACCAATATTTTATTGGTACCTGAAACTGATTATGACACTCA  | [1526] |
| Megaderma    | ATGGAGAGTACCAAGTATTTTATTGGTACCTGATACTGATTATGGCACTCA | [1514] |
| Cynopterus   | ACAGAGAGTACCAAGTATTTTATTGGGACCTGAAACGATTATGGCACTCA  | [1523] |
| Pteropus     | ACAGAGAGTACCAAGTATTTTATTGGTGCCTGAAACGATTATGGCACTCA  | [1520] |
| Hipposideros | ATGGAAAATACCAAGTATTTTATTGGTACCTGATACTGATTATGGCAGTCA | [1541] |
| Cat          | GTAGAGAGTACCAAGTATTTTATTGGTACCTGATGCCGATTATGGCACTCA | [1541] |
| Human        | GTAGAGAGTACCAAGTATTTTATTGGTACCTGGTACTGATTATGGCACTCA | [1541] |
| Mouse        | GAGGAGAGCACCAGCGTATCCTTGGTACCTGACACTGACTACGACACTCA  | [1526] |
| Flyinglemur  | GTAGAGAGTACCAAGTATTTTATTAGTACCTGATACTGATTATGGCACTCA | [1544] |
| NycterisG    | ATGGAGAGTACCAAGATTTTATTGGTACCTGAAACTGATAATGACATGCA  | [1523] |
| Antrozous    | TCCGAGAGTACCAATATTGTATTGGTACCTGAAACTGATTATAGCACCCA  | [1529] |
| Rhogeessa    | TCCGAGAATACCAATATTGTATTGGTATCTGAAACTGATTATAGCACCCA  | [1529] |
| Noctilio     | ATGGAGAGT?????????ATTGGTACCTGAAACTGATGATGGCACTCA    | [1529] |
| Natalus      | ATGGAGAGTACCAACAGTTTATTGGTACCCGAAACTGATTATGGCACTCA  | [1526] |
| Rhinolophus  | ATGGAAAATACCTGCTATTTTATTGGTACCTGATACTGATTATGGCACTCA | [1541] |
| Rousettus    | ACAGAGAGTACCGGTATTTTATTGGTACCTGAAACAGATTATGGCACTCA  | [1523] |

|             |                                                      |        |
|-------------|------------------------------------------------------|--------|
| NycterisT   | ATGGAAAGTACCAAGATTTTATTTGGTGCCTGAAACTGATTATGACATGCA  | [1523] |
| Nyctimene   | ACGGAGAGTACCAAGTATTGTATTGGTACCTGAAACGGATTATGGCACTCA  | [1520] |
| Mole        | GGCGAGAGTACCAATATTTTCATTGGTACCTGAGACTGATTTTGGCAGTCA  | [1538] |
| Horse       | GTAGAGAGTCCGGTATTTTCATTGGTACCTGATACTGATTATGGGACTCA   | [1544] |
| Desmodus    | ATGGAGAGCACCATAATTTTACTGGTGCCTGACACTGACTGTGACACTCA   | [1526] |
| Rhinopoma   | ATGGAGAGTACTAGTATTTTCATTGGTACCTGATACTGATTATGGCACTCA  | [1541] |
| Emballonura | ATGGAGAGTAAACAATATTTTATTTGGTACCTGAAACTGATTATGACACTCA | [1526] |
| Cow         | GTAGAGAGTACCAATATTTTCTTGGTTCCTGATACTGATTATAGCACTCA   | [1517] |
| Pangolin    | GTAGAGAGTAAACAGTATTTTCATTGGTACCTGATACTGATTACGGCACTCA | [1520] |
| Whale       | GTAGAGAGTACCGGTATTTTCCTTGGTACCTGATACTGATTATGGCACTCA  | [1532] |

|   |      |      |      |      |       |
|---|------|------|------|------|-------|
| [ | 1560 | 1570 | 1580 | 1590 | 1600] |
| [ | .    | .    | .    | .    | .]    |

|              |                                                      |        |
|--------------|------------------------------------------------------|--------|
| Tonatia      | GGATAGCGTCTCCCTGTGGCACCTGACACCCAG---GGAAGGCAGAAA     | [1576] |
| Myotis       | GGATAGTGTCTCATTACTGGAACCTGACATCCCAG---GGAAGGCCAAAA   | [1576] |
| Tadarida     | GGATAGTATCTCATTACTGGAACCTGACACCCAG---GGAAGGCCAAAA    | [1567] |
| Taphozous    | GTATAGTATCTCATTACTGGAACCTGACACCCAG---GGAAGGCCAAAA    | [1573] |
| Megaderma    | GGCTAGTATGTCTCATTACTGGAACCTGACACCCAG---GGAAGGTAAAA   | [1561] |
| Cynopterus   | AGATAGTATCTCATTACTGGAATCTGACATCCCAG---GGAGGGCAAGA    | [1570] |
| Pteropus     | AGATAGTATCTCATTACTGGAACCTGACATCCCAG---AGAGGGTAAAA    | [1567] |
| Hipposideros | AGACAGTATGTCTCATTACTGGAACCTGACACCCAG---GGAAGGCCAAAA  | [1588] |
| Cat          | GGATAGTATCTCATTACTGGAAGCTGACACCCAG---GGAAGGCCAAAA    | [1588] |
| Human        | GGAAAGTATCTCATTACTGGAAGTTAGCACTCTAG---GGAAGGCCAAAA   | [1588] |
| Mouse        | GAACAGTGTCTCAGTCTGGACGCTCACACTGTCA---GATATGCAAGAA    | [1573] |
| Flyinglemur  | AGACAGTATCTCATTACTGGAAGCTGACATCCCAG---GGAAGGCCAAAA   | [1591] |
| NycterisG    | GGATAGTATCTCATTACTGGAACCTGACACCCAG---GGATGGCAAAAA    | [1570] |
| Antrozous    | GGATAGTCTCTCATTACTGGGACCTGACACCCAG---GGAAGGCCAAGA    | [1576] |
| Rhogeessa    | GGATAGTCTCTCATTACTGGGACCTGACACCCAG---GGAAGGCCAAGA    | [1576] |
| Noctilio     | GGATAGTATCTCATTACTGGAACCTGATACCCAAG---GGAAGGCCAAAA   | [1576] |
| Natalus      | GGATAGTATCTCATTACTGGAACCTGACGCCCCAG---GGAAGGCCAAAA   | [1573] |
| Rhinolophus  | GGATAGTATGTCTCATTACTGGAACCTGACACACCAG---GGATGGCAAAAA | [1588] |
| Rousettus    | AGATAGTATCTCATTACTGGAACCTGACATCCCAG---GGAAGGCCAAGA   | [1570] |
| NycterisT    | GGATAGTATCTCATTACTGGAACCTGACACCCAG---GGAAGGCCAAAA    | [1570] |
| Nyctimene    | AGATAGTATCTCATTACTGGAACCTGACATCCCAG---GGAGGGCAAGA    | [1567] |
| Mole         | GGATAGTGTCTCATTACTGGAATTTGACATCCTAG---GCAAGGCCAAAA   | [1585] |
| Horse        | GGATAGTATCTCATTACTGGAAGCTGACACCCAG---GGAAGGCCAAAA    | [1591] |
| Desmodus     | GGAGAGTGTCTCATTACTGGCTCCTGACACCCAG---GGGAGGCCAAAA    | [1573] |
| Rhinopoma    | GGAGAGTATGTCTCATTACTGGAACCTGATACCCAG---GGAAGGCCAAAA  | [1588] |
| Emballonura  | GCATAGTATCTCATTACTGGAACCTGACACTCCAG---GGAAGGCCAAAA   | [1573] |
| Cow          | GGATAGTATCTCATTACTGGAAGCTAAAACCCAG---AAAAGGCCAAGA    | [1564] |
| Pangolin     | GGATAGTATCTCATTACTGGAAGCTGACACACTAG---GGAAGGCCAAAA   | [1567] |
| Whale        | GGATAGTATCTCATTACTGGAAGCTGACACCCAG---GGAAGGCCAAGA    | [1579] |

|   |      |      |      |      |       |
|---|------|------|------|------|-------|
| [ | 1610 | 1620 | 1630 | 1640 | 1650] |
| [ | .    | .    | .    | .    | .]    |

|              |                                                      |        |
|--------------|------------------------------------------------------|--------|
| Tonatia      | CAGCACCAAGCCAACTGTGGGTGGGTCGCGAGCTGCTGGAAGCCCAAG     | [1626] |
| Myotis       | CAGCTCCAAATCAATGTGGGGATCTGTGTGCAGCAATTAATAATCCTAAA   | [1626] |
| Tadarida     | AAGCTCCAAATCAATATGCGGGTCTGTGTGCAGAAATTAATAACC?CAAG   | [1617] |
| Taphozous    | CAGCACCAAGTCAACATGCGAGTCTGTGTGCAGCAATTGAAAACCCCAAG   | [1623] |
| Megaderma    | CAGCACCAAAATCGACGTGCAGTGTGTGTGCTGCAATTGAAAACCCCAAG   | [1611] |
| Cynopterus   | CAGCACCAAAACCAATGCGAGTCTGTGTGCAGCAATTGAAAACCCCAAG    | [1620] |
| Pteropus     | CAGCACCAAAACCATCATGCA-----GCAATTAATAAACCCCAAG        | [1605] |
| Hipposideros | CTGCACCAAAATCAACATGTGGGTGTATGTACAGCAGTTGAAAACCCCGAG  | [1638] |
| Cat          | CAGCACCAAAATCAACGTGTGAGTCTGTGTGCAGCAATTGAAAACCCCAAG  | [1638] |
| Human        | CAGAACCAAAATAATGTGTGAGTGTGAGTGTGCAGCAATTGAAAACCCCAAG | [1638] |
| Mouse        | CAGGATCCGCTCAGTGTATGACTCAGTTGTAGCAAGCGAAAACCCCAAG    | [1623] |
| Flyinglemur  | CAGCACCAAGTCAACATGCAAAATCAGTGTGCAGCAATTGAAAACCCCAAG  | [1641] |
| NycterisG    | CAACACTAAATCAACCTGCGAGTCTGTGTGCAGCAATTGAAAACCCCAAG   | [1620] |
| Antrozous    | CAGCTTCAAATCAGTGTGGGGATCTGCGTGCAGCAGTTAAATAATCCTGAA  | [1626] |
| Rhogeessa    | CAGCTCCAGATCAGTGTGGGGATCTGTGTGCAGCAATTAAATAATCCTGAA  | [1626] |
| Noctilio     | TGCCATCAAATCAACGTGTATGTGGGTGTACAGCAATTGAAAACCCCAAG   | [1626] |
| Natalus      | CAGCTCCAAATCAAGTGTGAGTCTGTGTGCAGCAATTAAATAACCCCGAG   | [1623] |
| Rhinolophus  | CAGCACCAAAATCAACATGTGGGTGTGTGTACAGCCATTGAAAACCCCAAG  | [1638] |
| Rousettus    | CAGCACCAAAACCAATGCGAGTCTGTGTGCAGCAATTGAAAACCCCAAG    | [1620] |
| NycterisT    | CAGCACTCAGTCAACCTGCGAGTCTGTGTGCAGCAATTGAAAACCCCAAG   | [1620] |
| Nyctimene    | CAGCACCAAAACCAAAATTCAGTCTGTGTGCAGCAATTGAAAACCCCAAG   | [1617] |
| Mole         | AAGTGCCGAATCAGTGTGCAAGTCTGTGTACAAAAATGAAAACCTTAAG    | [1635] |
| Horse        | CAGCACCAAAATCAATGTGCAAAATCTATGCGCAGCAATTGAAAACCCCAAG | [1641] |
| Desmodus     | CAGCACCAAAATCAATGTGGGGTGGGGTGCAGCAATTGAAAACCCCAAG    | [1623] |
| Rhinopoma    | CAGCACCAAAATCAACATGCGGACATGTGTGCAGCAATTGAAAACCCCAAG  | [1638] |
| Emballonura  | TGGCACCAAAATCAATGTGTGGGTCTGCGTGCAGCAATTGAAAATCCCAAG  | [1623] |

|          |                                                     |        |
|----------|-----------------------------------------------------|--------|
| Cow      | CTGCACCAAAATCCATGTGTGAGTCTGTGTACAGCAACCAAAAACCTCAAG | [1614] |
| Pangolin | CAGCACCAAAATCAATGTGCAAGTCTGTGTGCAGCAATTGAAAACCCCAAG | [1617] |
| Whale    | CAGCACCAAAATCAACATGTGAGTCTGTGTGCAGCAATTGAAAAGCCCAAG | [1629] |

[ 1660 1670 1680 1690 1700 ]  
[ . . . . . ]

|              |                                                       |        |
|--------------|-------------------------------------------------------|--------|
| Tonatia      | GAACTTATCCGTGATTGTTTCAAG-----GACACAGAGGGCGT           | [1664] |
| Myotis       | GAACTTATTCGTGGTGTCTTAAAGATATTAGAAATGACAGAGAGGGCTT     | [1676] |
| Tadarida     | GAACTTATCCATGGTGTCTTAAAGATAATAGAAATGACAGAGAGGACAT     | [1667] |
| Taphozous    | GAGTTTAAACCATGGTGTCTTAAAGATACTAGAAAGTACACAGAGGGTGT    | [1673] |
| Megaderma    | GAAATTATCCATGGTGTCTTAAAGATACTAGAAATGACACAGGGGACTT     | [1661] |
| Cynopterus   | GAACTTATTCATGATTGTTTTAAAGAACTAGAAATGACACAGAGAGCTT     | [1670] |
| Pteropus     | GAACTTATTCATGGTGTCTTAAAGATACTAGAAATGATGCAGAGGGCTT     | [1655] |
| Hipposideros | GAACTTATCCATGGTGTCTTAAAGATACTAGAAATGACACAGAGAGCTT     | [1688] |
| Cat          | GAAGCTATCCGTGGTGTCTTAAAGATACTAGAAATGGCACAGAGAGTTT     | [1688] |
| Human        | GGACTAATTCATGGTGTCTTAAAGATAATAGAAATGACACAGAAGGCTT     | [1688] |
| Mouse        | GAACTCGTCCATGGC---TCTAACAATGCTGGGAGTGGCACAGAGGGTCT    | [1670] |
| Flyinglemur  | GAACTTATCCATGGTGTCTTAAAGGTAAGTACTAGAAATGACACAGAGGATT  | [1691] |
| NycterisG    | GAACTTATCCATGGTGTCTTAAAGATACTAGAAATGACACAGAGGGCTT     | [1670] |
| Antrozous    | GAACTTACTTGTAGTGGTCTTAAAGATACTAGAAATGGCAGAGAGGGCTT    | [1676] |
| Rhogeessa    | GAACTTATTCATGGTGTCTTAAAGATACTAGAAATGACACAGAGGGCTT     | [1676] |
| Noctilio     | GAATTTATCTATAAATGTTCTTAAAGATACTAGAAATGACACAGAGGGCTT   | [1676] |
| Natalus      | GAATTTATCCATGGTGTCTTAAAGATACTAGAAATGACACAGAGAAAGCTT   | [1673] |
| Rhinolophus  | GAACTTATCCATGGT---TCTAATGGTACTAGAAATGACACAGAGAGCTT    | [1685] |
| Rousettus    | GAACTTATCCATGGTGTCTTAAAGATACTAGAAATGACACAGA-----      | [1664] |
| NycterisT    | GAACTTATCCATGGTGTCTTAAAGGTAAGTACTAGAAATGACACAGAGGGCTT | [1670] |
| Nyctimene    | GAACGTATTCATGGTGTCTTAAAGATACTAGAAATGACACAGAGGGCTT     | [1667] |
| Mole         | GAACTTATTCATGATTGTTCTTAAAGATACTAGAAATGACACACAGGGCTG   | [1685] |
| Horse        | GAACTTATCCATGGTGTCTTAAAGATACTAGAAATGATACACAGGGCGT     | [1691] |
| Desmodus     | GAGCTGATCTGTGATTGTTCTGATG-----ACACAGAGGGCGT           | [1661] |
| Rhinopoma    | GAACTTATCCATGGTGTCTTAAAGATACTAGAAATGACACAGAGGGCTT     | [1688] |
| Emballonura  | GAACTCAGCCATGGTGTCTTAAAGATACTAGAAAGTACACAGAGGGCTT     | [1673] |
| Cow          | GAACTTATCCATAGGGATTTTAAAGATACTAGAAATGACACAGAGGGCTT    | [1664] |
| Pangolin     | GAACTTATCCATGGTGTCTTAAAGATACTAGAAATGACACAGAGAGCTT     | [1667] |
| Whale        | GAACTTATCCATGGTGTCTTAAAGATACTAGAAATGACACAGAGGACTT     | [1679] |

[ 1710 1720 1730 1740 1750 ]  
[ . . . . . ]

|              |                                                      |        |
|--------------|------------------------------------------------------|--------|
| Tonatia      | TAAGGATCTCCCAGATGTGAAGTTCAGGAG---AC-----GAGCA        | [1702] |
| Myotis       | TAAGGATCTATTGAGATGTGAAGTAAACCAC---ACGCAGGAGACAAGCA   | [1723] |
| Tadarida     | TAAGGATCTATTGAGACCTGAAGTAAACCAC---A???????????????   | [1714] |
| Taphozous    | TAAGGATCTACTGAGATGTGAAATTAACCAC---ACTCAGGAGACAAGCA   | [1720] |
| Megaderma    | TAAGGATCCACTAAGAGGTGAAGTAAACCAC---ACTCAGGAGGACAGACA  | [1708] |
| Cynopterus   | TAAAGATCCATTGAGACATGAAGTAACTCC---AC???????????????   | [1717] |
| Pteropus     | TAAAGATCCATTGAGACGTGAAGTAACTAC---A?????????????????  | [1702] |
| Hipposideros | TAAGGATTCATTGAGACATGAAGTAAACCAC---GGTCAGGAGACAAGCA   | [1735] |
| Cat          | TACAGATCCTCTGAGACGTGAAGATA?CCAT---ACTCAGGAGACAAGTA   | [1735] |
| Human        | TAAGTATCCATTGGGACATGAAGTAAACCAC---AGTCGGGAAACAAGCA   | [1735] |
| Mouse        | CAAGCCCCCTTGGAGACACGCGCTTAAACCCT---AGTCAGGAGAAA---G  | [1714] |
| Flyinglemur  | TAAGGATCCATTGAGATGTGGAGTTGACCAC---ATTCAGAAGACAAGCA   | [1738] |
| NycterisG    | TAAGGCTCTATTGAGAAGTGAAGTAAACCAC---ACTCCAGAGACAAGCA   | [1717] |
| Antrozous    | TAAGGATCTATTGAAATGTGAAGTAAACCAC---ACTCAGACAA---GCA   | [1720] |
| Rhogeessa    | TAAGAATCTATTGAGATATGAAGTAAACCAC---ACTCAGACAA---GCA   | [1720] |
| Noctilio     | TAAGGATCTATTGAGATGTGAAGTAAACCAC---ACTCAGGAGACAAGCA   | [1723] |
| Natalus      | TAAGGATCCACTGAGATGTGAAGTAAACCAT---ACTCAGGAGACAAGCA   | [1720] |
| Rhinolophus  | TAAGGATCCATTGCAATGTGAAGTAAACCAT---GTTGAAGAGACAAGCG   | [1732] |
| Rousettus    | -----TCCATTGAGACATGAAGTAACTAC---ACTCAGAAGACAACA      | [1705] |
| NycterisT    | TAAGGATCTATTGAGAAGGGAAGTAAACCAC---ACTCCAGAGACAAGCA   | [1717] |
| Nyctimene    | TAAAGATCCATTGAGACATGAAGTAACTAC---ACTCAGAAGACAACA     | [1714] |
| Mole         | TAAGGATCCACTGAAATACGAAGTAAACCAC---ACTCAGGAGATAAGGA   | [1732] |
| Horse        | TAAGGATCCATTGAGACGTGAAGTAAACCAC---ACTCAGGAGACAAGCA   | [1738] |
| Desmodus     | TAAGGATCTCTTGGAGATGTGAAGTTCAGGAG---AC??????????????? | [1708] |
| Rhinopoma    | TAAGGATTTATTGAGAGGTGAAGTAAACCAC---ACTCAGAAGACAAGCA   | [1735] |
| Emballonura  | GAAGGATCTATTGAGATGTGAAGTAAACCAG---ACTCAGGAGACAAGCA   | [1720] |
| Cow          | TCAGGATCTACTGGGACATGACATTAACCTACGTCATTCAGGAGACAAGCA  | [1714] |
| Pangolin     | TAAGGATCTATTGAGACATGAAGATAACCAC---ACTCAGGAGACAAGCA   | [1714] |
| Whale        | TCAGGATCCACTGGGACATCACGTTAAACCAC---ATTCAGGAGGCGAGCG  | [1726] |

[ 1760 1770 1780 1790 1800 ]  
[ . . . . . ]



|              |                                                      |        |
|--------------|------------------------------------------------------|--------|
| Tonatia      | TAGAAATGGAGGAGAGTGAACCTTGATACACAGTATTTACAGAATACCTTT  | [1752] |
| Myotis       | TAGAAATGGAAGAGAGTGAACCTTGATACACAGGAATTACAGAATACATTC  | [1773] |
| Tadarida     | ????????GGAAGAGAGTGAACCTTGATACACAGTATTTACAGAATACATTC | [1764] |
| Taphozous    | TAGAAATGGAAGAGAGTGAACCTTGATACACAGTATTTACAGAATACATTC  | [1770] |
| Megaderma    | TAGAAATGGAAGAGAGTGAACCTTGATACACAGTATTTACAGAAAACATTC  | [1758] |
| Cynoapterus  | ???????????????????????????????????????????????????? | [1767] |
| Pteropus     | ???????????????????????????????????????????????????? | [1752] |
| Hipposideros | TAGAAATGGAAGAGAGTGAACCTTGATACACAGTATTTACAGGAAACATTC  | [1785] |
| Cat          | TAGAAATGGAAGAGAATGAACCTTGATACGCAGTGGTTATACAATACGTTC  | [1785] |
| Human        | TAGAAATGGAAGAAAGTGAACCTTGATGCTCAGTATTTGCAGAATACATTC  | [1785] |
| Mouse        | TAGAAATGGAAGACAGTGAACCTTGATACTCAGTATTTGCAGAATACATTT  | [1764] |
| Flyinglemur  | TAGAAATGCAAGAGAGTGAACCTTGATACTCAGTATTTACAAAATATATTC  | [1788] |
| NycterisG    | TAGAAATGGAAGAGAGTGAACCTTGATACGCAGTATTTACAGAATACATTC  | [1767] |
| Antrozous    | CAGAAGTGAAGAGAGTGAACCTTGATACACAGTATTTACAGAATACATTC   | [1770] |
| Rhogeessa    | CAGAAGTGAAGAGAGTGAACCTTGATACTCAGT????????????????    | [1770] |
| Noctilio     | TAGAAATAGAAGAGAGTGAACCTTGATATACAAAATTTACAGAATACATTC  | [1773] |
| Natalus      | TAGAAATGGAAGAGAGTGAACCTTGATACACAGTATTTACAGAATACGTTC  | [1770] |
| Rhinolophus  | TAGAAATGGAAGAGAGTGAACCTTGATACTCAGTATTTGCAGAAAACATTC  | [1782] |
| Rousettus    | TTGAAATAGAAGAGAATGAACCTTGATACACAGTATTTACAGAATACATTC  | [1755] |
| NycterisT    | TAGAAATGGAAGAGAGTGAACCTTGATACGCAGTATTTACAGAATACATTC  | [1767] |
| Nyctimene    | TTGAAATAGAAGAGAATGAACCTTGATACACAGTATTTACAGAATACATTC  | [1764] |
| Mole         | TAGAAATGGAAGAGAATGAACCTTGATACACAGTATTTACAGTCTACGTTC  | [1782] |
| Horse        | TAGAAATGGAAGAGAGTGAATTTGATACGCAGTATCTACAGAATATGTTC   | [1788] |
| Desmodus     | ???????????????????????????????????????????????????? | [1758] |
| Rhinopoma    | TAGAAATGGAAGAGAGTGAACCTTGATACACAGTATTTACAGAGAACATTC  | [1785] |
| Emballonura  | TAGAAATGGAAGAGAGTGAACCTTGATACACAATATTTACAGAATACATTC  | [1770] |
| Cow          | GAGAAATGGAAGACAGTGAACCTTGATACACAGTATTTGCAGAATACATTC  | [1764] |
| Pangolin     | TAGGAACGGAAGAGAATAAATTTGATAAGCAGTACTTACAGAATACTTTC   | [1764] |
| Whale        | CAGAAATGGAAGAGAATGAACCTTGATACACAGTATTTGCAGAATATGTTC  | [1776] |

[ 1810 1820 1830 1840 1850 ]  
[ . . . . . ]

|              |                                                      |        |
|--------------|------------------------------------------------------|--------|
| Tonatia      | AGGGTTTCAAAGCGGCAGTCATTTGCTCTGTGTTCAAATCCAGGGAATCC   | [1802] |
| Myotis       | AAGGTGTCAAAGCGCCAGTCATTTGCTCTGTTTTCAAATCCAGAA-----   | [1818] |
| Tadarida     | AAGGTTCCAAACCGTCAGTCGTTTGCTCTGTTTTCAAATCCAGAA-----   | [1809] |
| Taphozous    | AAGTTTCAAAGCGTCAGTCATTTGCTCTGTTTTCAAATCCAGAAAATCC    | [1820] |
| Megaderma    | AAGGTTCCAAACCGTCAATCATTGCTCTGCTTTCAAATCCAGGAAATCC    | [1808] |
| Cynoapterus  | ???????????????????????????????????????????????????? | [1812] |
| Pteropus     | ???????????????????????????????????????????????????? | [1797] |
| Hipposideros | AAGTTTCAAAGCGTCAATCATTGCTCTGTTTTCAAATCCAGGAAATCA     | [1835] |
| Cat          | AAGGGTCAAACCGTCAGTCATTTGCTCTGTTTTCAAATCCAGGAAACCC    | [1835] |
| Human        | AAGTTTCAAAGCGCCAGTCATTTGCTCCGTTTTCAAATCCAGGAAATGC    | [1835] |
| Mouse        | CAAGTTCAAAGCGTCAGTCATTTGCTTTATTTCAAACCTAGAAAGTCC     | [1814] |
| Flyinglemur  | AAGTTTCAAACCGTCAGTCATTTGCTCTCTTTCAAATCCAGGAAATCC     | [1838] |
| NycterisG    | AAGTTTCAAAGCGTCAATCATTGCTCTGTTTTCAAATCCAGGAAATCC     | [1817] |
| Antrozous    | AAGGCTTCAAAGCGCCAGTCATTCGCTCTGTTTTCAAATCCGGGA-----   | [1815] |
| Rhogeessa    | ???????????????????????????????????????????????????? | [1815] |
| Noctilio     | AAGTTTCAAACCGTCAGTCATTTGCTCTGTTTTCAAATCCAGGA-----    | [1818] |
| Natalus      | AAAGTTCAAAGCGTCAGTCATTTGCTCTGTTTTCAAATCCAAA-----     | [1815] |
| Rhinolophus  | AAGTTTCAAAGCGTCAGTCATTTGCTTTGTTTTCAAATCCAGAAAATCC    | [1832] |
| Rousettus    | AAAGTTCAAAGCGTCAGTCATTTGCTTTGTTTTCAAACCCAGGAAATCT    | [1805] |
| NycterisT    | AAGTTTCAAAGCGTCAATCATTGCTCTGTTTTCAAATCCAGGAAATCC     | [1817] |
| Nyctimene    | AAGTTTCAAAGCGTCAGTCGTTTGCTTTATTTCAAACCCAGGAAATCT     | [1814] |
| Mole         | AAAGCTTCAAAGCGTCAATCATTGCTCTGTCTTCCATCCGGGAAATTC     | [1832] |
| Horse        | AAGTTTCAAAGCGTCAGTCATTTGCTCTGTTTTCAAATCCAGGAAAGTCC   | [1838] |
| Desmodus     | ?????????AAGCGCAATCATTGCTCTGTGTTCAAATCCAGGAAATCC     | [1808] |
| Rhinopoma    | AAGTTTCAAAGCGTCAGTCATTTGCTCTGTTTTCAAATCCAGGAGATCC    | [1835] |
| Emballonura  | AAGTTTCAAAGCGTCAGTCATTTGCTCTGTTTTCAAATCCAGGAAAGTCC   | [1820] |
| Cow          | AAGCTTCAAAGCGTCAGACATTTGCTCTGTTTTCAAATCCAGGAAATCC    | [1814] |
| Pangolin     | AGGGTTTCAAAGCATCAGTCATTTGCTCAGTTTTCAAATATGGGAAATCC   | [1814] |
| Whale        | AGGGTTTCAAAGCGTCAGACGTTTGTCTGTTTTCAAATCCAGAA-----    | [1821] |

[ 1860 1870 1880 1890 1900 ]  
[ . . . . . ]

|             |                                                    |        |
|-------------|----------------------------------------------------|--------|
| Tonatia     | AGGAAAGGAATGTGCAACCATGTATTTCCACTCCAGGTCCACAAGGAAAC | [1852] |
| Myotis      | ----AAGGAATGTGCAACAGCCTATGCTCACTCCAGTCTTTAAGGAAAC  | [1864] |
| Tadarida    | ----AAGGAATATGCAACAGTCTATGGCCACTCCAGGTCTTAAGGAAAC  | [1855] |
| Taphozous   | AGAAAAGGAATGTGCAACAGTCTATGCCACTCCAAGTCTTAAGGAAAC   | [1870] |
| Megaderma   | AGAAAAGGAATGTGCAACAGTCTGTGCCACTCCAGTCTTAAGGAAAC    | [1858] |
| Cynoapterus | ----AAGGAATGTGCAACAGGCTATGCCACTCCAGGTCTTGATAAAAC   | [1858] |
| Pteropus    | ----AAGGAATGTGCAACAGGCTATGCCACTCCAAGTCTTGAGGAAAC   | [1843] |

|              |                                                     |        |
|--------------|-----------------------------------------------------|--------|
| Hipposideros | AAGAAAGGAATGTGCAACAATCCAGTCC-----AGGTCCTTAAGGAAAC   | [1879] |
| Cat          | AGAAAAGGAATGTGCTACAGCCTGGGCCCGTTCCACGTCCTTAAGGAAAC  | [1885] |
| Human        | AGAAGAGGAATGTGCAACATTCTTGCCCACTCTGGGTCCTTAAGGAAAC   | [1885] |
| Mouse        | CCAAAAGGACTGTGCT---CACTCTGTGCCCTCA-----AAGGAAC      | [1852] |
| Flyinglemur  | AGAAAAGGAGTGTGCAACAGTCTATGCCCACTCCAGGTTGTTAAGGAAAC  | [1888] |
| NycterisG    | AGAAGAGGACTGTGCC-----ACTTCAGGTCCTTAAGGAAAC          | [1855] |
| Antrozous    | ----AAGGAATGTGCAACAGTCTGTGCTCACTCCAGTCTTTAAGGAAAC   | [1861] |
| Rhogeessa    | ----AAGGAATATGCAACAGTCTATACTCACTCCAGTCTTTAAGGAAAC   | [1861] |
| Noctilio     | ----AAGGAATGTGCAGTCTGTCTGTCTCACTCCAGGTCACAAGGAAAC   | [1864] |
| Natalus      | ----AAGGAATGTACCACAGTCTATACCACTCCAAGTCCTTAAGGAAAC   | [1861] |
| Rhinolophus  | AGAAAAGGAATGTGCAACAGTCTATACTCACTCCAGGTCCTTAAGGAAAC  | [1882] |
| Rousettus    | AGAAAAGGAATGTGCAACAGGCTATGCCCACTCCAGGTCCTTGAGGAAAC  | [1855] |
| NycterisT    | AGAAAGCTCTGTGCC-----ACTCTAGGTCCTTAAGGAAAC           | [1855] |
| Nyctimene    | AGAAAAGGAATGTGCAACAGGCTATGCCCACTCCAGGTCCTTGAGAAAC   | [1864] |
| Mole         | AGAAAAGAAATATCCCCAGTCTGTGCCCTTCCAGGTCCTTGAAAGAGAC   | [1882] |
| Horse        | AGAAAAGAAAGTGTGCAACAGTCACTGCCCACTCCAGGTCCTTAAGGAAAC | [1888] |
| Desmodus     | AGAAAAGGAATGTGCATCCGCTTTTGCCCACTCCGGGTCACAAGGAAAC   | [1858] |
| Rhinopoma    | AGAAAAGGAATGTACAACAGTCTATGCCCACTCCAGTCTTTAAGGAAAC   | [1885] |
| Emballonura  | AGGAAAGGAATGTGCGACTATCTATGCCCCCTCCAGGTCCTCAAGGAAAC  | [1870] |
| Cow          | ACAAAAGGAATGTGCCACAGTCTTTGCCCACTCCGGGTCCTTAAGGATC   | [1864] |
| Pangolin     | AGAAAAGGAATGTGCAGCAGTCACTGCCCACTCTGGGTCCTTAAGGAAAC  | [1864] |
| Whale        | ----AAGGAATGTGCAACAGTCTGTGCCCGCTCTGGGTCCTTAAGGAAAC  | [1867] |

|   |      |      |      |      |       |
|---|------|------|------|------|-------|
| [ | 1910 | 1920 | 1930 | 1940 | 1950] |
| [ | .    | .    | .    | .    | .]    |

|              |                                                    |        |
|--------------|----------------------------------------------------|--------|
| Tonatia      | GAAGTCCAAAAGTTACTCTTGAATGTGGACGAAAA--GAACATCAGGGA  | [1899] |
| Myotis       | AAAGTCCAAAAGTCACCTCTTGAATGTGGACAAAAAGAAGAAATCAGGGA | [1914] |
| Tadarida     | AAAGTCCAAAAGTCACCTCTTGAATGTGGACAAAAAGAAGAAATCAGGGA | [1905] |
| Taphozous    | ACAGTCCAAAAGTCACCTTTGGATGTGGTCAAAAAGAAGAAATCAGGAA  | [1920] |
| Megaderma    | AAAGTCCAAAAGTCACCTCTTGAATGTGGACAAAAAGAAGAAATCAGGGA | [1908] |
| Cynopterus   | AAAGTCCAAAAGTCACCTCTTGAATGTGACCGAAAA--GAAATCAGGGA  | [1905] |
| Pteropus     | AAAGTCCAAAAGTCACCTCTTGAATGTGACCGAAAA--GAAATCAGGGA  | [1890] |
| Hipposideros | AAAGTGCAAAAGTCACCTCTTGAATGTGGACAAAAAGAAGAAATCAGGGA | [1929] |
| Cat          | AAAGTCCAAAAGTCGCTCTTGAATATGAACAAAAAGAAGAAATCAGGGA  | [1935] |
| Human        | AAAGTCCAAAAGTCACCTTTGAATGTGAACAAAAAGAAGAAATCAAGGA  | [1935] |
| Mouse        | TGAGTCCAAAAGTGACAGCTAAAGGTAACAAAA--GAACGTCAGGGA    | [1899] |
| Flyinglemur  | AAAGTCCAAAAGTCACCTCTTGAATGTGAACAAAAAGAAGAAATGAGGGA | [1938] |
| NycterisG    | AAAGTCCAGAAGTCACCTTAGAATATGAACAAAA--GAAACCCAGGGA   | [1902] |
| Antrozous    | AAAGTCCAAAAGTCACCTCTTGAATGTGGACAAAAAGAAGAAATCAGGAA | [1911] |
| Rhogeessa    | AAAGTCCAAAAGTCACCTCTTGAATGTGGACAAAAAGAAGAAATCAGGAA | [1911] |
| Noctilio     | AAAGTCCAGAAGTACTCTTGAATGTGAAGAAAA--GAAGAACAGGGA    | [1911] |
| Natalus      | AAAGTCCAAAAGTCACCTCTTGAATGTGGACAAAAAGAGGAAATCATGGA | [1911] |
| Rhinolophus  | AAAGTCCAAAAGTCACCTCTTGAATGTGGACAAAAAGAAGAAATCGGGGA | [1932] |
| Rousettus    | ACAGTCCAAAAGTCACCTCTTGAATGTGAGCGAAAA--GAAATCAGGGA  | [1902] |
| NycterisT    | AAAGTCCAGAAGTCACCTTAGAATATGAACAAAA--GAAAACCCAGGGA  | [1902] |
| Nyctimene    | AAAGTCCGAAAGGCACTCTTGAATGTGAACGAAAA--GAAATCAGGGA   | [1911] |
| Mole         | AAACTCCAAAATCACCTCTGGAATGTGAAGTAAAGAAAGAAATCAAGGG  | [1932] |
| Horse        | AAAGTCCAAAAGTCACCTTTAAATGTGGACAAAAAGAAGAAAGGAGGGA  | [1938] |
| Desmodus     | AAAGTCCAAAAGTTACTCTTGAATGTGGACAAAA--GAAATCGAGGA    | [1905] |
| Rhinopoma    | AAAGTCCAAAAGTCACCTCTTGAATGTGGACAAAAAGAAGAAATCAGGGA | [1935] |
| Emballonura  | AAAG-----TCTTGGATGTGGACAAAAAGAAGAAATCAGGGA         | [1908] |
| Cow          | AAAGTCCAAAGAGACCCCTCAAATGCAGACAAAAAGAAGACAGTCAGGGA | [1914] |
| Pangolin     | AAAGTCCAAAAGTCACCTCTTGCATATGGACAAAAAGAAGAAATGAGGGA | [1914] |
| Whale        | AAAGTCCAAAGAGTCCCTCTTGAATGCAGACAAAAAGAAGAAATCAGGGA | [1917] |

|   |      |      |      |      |       |
|---|------|------|------|------|-------|
| [ | 1960 | 1970 | 1980 | 1990 | 2000] |
| [ | .    | .    | .    | .    | .]    |

|              |                                                      |        |
|--------------|------------------------------------------------------|--------|
| Tonatia      | GAGAAAGGAATTTAATATGAGAGCTGCGCAGCCACCTTACACAACAGCAGG  | [1949] |
| Myotis       | AAGAAAGAATCTAAAATCAAGCATGTACAGGCAGTTACACAGCTGTAGG    | [1964] |
| Tadarida     | GAGAAAGAATCTGAAATCAAGTATGTACGGGGAGTTACACAACCTGCAGG   | [1955] |
| Taphozous    | GAGAAAGAATCTAAAATCAAGCATGTACAGGCTGTTACACAGCTGCAGG    | [1970] |
| Megaderma    | AAGAAAGAGTCCAAAATCAAGCATGTGCAGGCAGTTCCAAACAACCTGCAGG | [1958] |
| Cynopterus   | AAGAAAGAGTCTAACAT?GAGCATGTGCAGGCAGTTTATACAACCTATAGG  | [1955] |
| Pteropus     | AAGAAAGAGTCTAACGTCAGCATGTGCAGGCAGTTTATACAACCTGTAGG   | [1940] |
| Hipposideros | AAGAAAGATTTAAAATCAAGCTTGTACAGGCAGTTTATACAACCTGCAGG   | [1979] |
| Cat          | AAGAATCAGTCTGAAATCAAGCATGTGCAGGCAGTCCGTCACACTGCAGG   | [1985] |
| Human        | AAGAAAGAGTCTAATATCAAGCTGTACAGACAGTTAATATCACTGCAGG    | [1985] |
| Mouse        | CAGGAAGAATTTGAAATCAGTCAGTACAAGCAGTTGCGGCCACAGTGGG    | [1949] |
| Flyinglemur  | AATAAAGAGTCTAAAATCAAGCACATACAGGCAGTTAATACCACCTGTGGG  | [1988] |
| NycterisG    | GAAAAAGAATCTAAAATCAAGCATATACAGGCAGTTTACGCAGCTGCCGG   | [1952] |
| Antrozous    | AAGAAAGAATCTAAAATCAAGCATGTACAGGCAGTTTACACAGCTGTAGG   | [1961] |

|             |                                                       |        |
|-------------|-------------------------------------------------------|--------|
| Rhogeessa   | AAGAAAGAATCTAAAATCAAGCATGTACAGGCAGTTACACAACCTGAAGG    | [1961] |
| Noctilio    | GAGAAAGAATCTAAAAGTCAAGCATGTACAGGCAGTTACACAACCTGCAGG   | [1961] |
| Natalus     | GAGAAAGAATCTAATATCAAGCATGTACAGGCAGTTACACAACCTGGAAG    | [1961] |
| Rhinolophus | AACACAGATTCTAAAACCTCAGGCATGTGCAGGAAGTTACATACAACTGTAGG | [1982] |
| Rousettus   | AAGAAAGAGTCTGACGTCAAGCATGTGCAGGCAGTTATACAACTGTAGG     | [1952] |
| NycterisT   | GAAAAAGAATCTAAAATCAAGCATATACAGGCAGTTACACAACCTGCAGG    | [1952] |
| Nyctimene   | AAGAAAGAGTCTAAAATCAAGCATGTGCAGGCAGTTACATACAACTGTGGG   | [1961] |
| Mole        | AAGAAAGAGTCTAAAACCTCAGGCATGTACAGGCAGTACATAGAATTGCAGA  | [1982] |
| Horse       | AAGAAAGAGTCTAAAATCAAGCATGTGCAGTCAGTTACACAACCTGTGGG    | [1988] |
| Desmodus    | GGGAAGGAATTTAGTATCGAGCACGCACAGGCACCTCACACAACAGCAGG    | [1955] |
| Rhinopoma   | AAGAAAGAGTCTAAAATCAAGCATGTGCAGGCAGTTACATACAACTGCAGG   | [1985] |
| Emballonura | GAGAAAGAACCTAAAATCAAGCATGTACAGGCAGTTACACAACCTGCAAG    | [1958] |
| Cow         | AAGAGTGAGTCTAAAAGCCAGCACGTGCAGGCCATTGTACAAACAGTGCA    | [1964] |
| Pangolin    | AAGAAAGAGTCTGAAATCAAGCATGTTCAAACAATTCATACAACTGCAGG    | [1964] |
| Whale       | AAGAGTGAGTCTAAAATCAAGCATGTGCAGGCAGTTAATAACAACCTGTGGA  | [1967] |

|   |      |      |      |      |       |
|---|------|------|------|------|-------|
| [ | 2010 | 2020 | 2030 | 2040 | 2050] |
| [ | .    | .    | .    | .    | .]    |

|              |                                                     |        |
|--------------|-----------------------------------------------------|--------|
| Tonatia      | CTTTCCTAAGGGTTGTGAGAAAGACAAAACGCCAGGAGAGTGTGCCACAT  | [1999] |
| Myotis       | CTTTCCTGTGGTTTGTGAGAAAGACAGAAAGCCAGGAGAGTATGCCAAAT  | [2014] |
| Tadarida     | CTTTCCTGTGGTTTGTGAGAAAGACGAAAAGCCAGAAGAATATGCCAAAT  | [2005] |
| Taphozous    | CCTTCCTGCCATTTGTGAGAAAGACAGAAGCCAGGAGAATATGACAGAT   | [2020] |
| Megaderma    | CTTTCCTGTGGTTTGTGAGAAAGAAAAAATCCAGGAGATTATGCCAAAT   | [2008] |
| Cynopterus   | CTTTCCTGGGGTTTCTGAGAAAGACAAAAGCCAGGAGATTATGCCAGAT   | [2005] |
| Pteropus     | CTTTCCTGTGGTTTGTGAGAAAGAAAAAAGCCAGGAGATTATGCTAAAT   | [1990] |
| Hipposideros | CTATCCTGTGGTTTGTGAGAAAGATGAAAATCCAGGAGATTATGCCAAAT  | [2029] |
| Cat          | CTTTTCTGCAGTCAGTCAGAAAGTGGAGAAGCCAGGTGATTATGCCAAAT  | [2035] |
| Human        | CTTTCCTGTGGTTGGTCAGAAAGAT---AAGCCAGTTGATAATGCCAAAT  | [2032] |
| Mouse        | CTTACCTGTGCCCTGTCAAGAAGGT---AAGCTAGCTGCTGATACAATGT  | [1996] |
| Flyinglemur  | CTTTTCTGTCTTTTGTGAGAATGTTAAGAAGCCAGGTGATTATGCCAAAT  | [2038] |
| NycterisG    | ATTTTCTGTCTTTGTGAGAAAGACATAAAGCCAGGAGAATATGCCAAAG   | [2002] |
| Antrozous    | CTTTCCTGTGGTTTGTGAGAAAGACGAAAAGCCGGGAGAGGATGCCAAAC  | [2011] |
| Rhogeessa    | CTTTCCTGTGGTTTGTGAGAAAGACAAAAGCCAGGAGAGGATGTCAAAT   | [2011] |
| Noctilio     | ATTCCTGTGGTTTGTGAGAAAGGCAAGAGCCAGGAGGGGATGCCAAAT    | [2011] |
| Natalus      | CTTTCCTGTGGCTTGTGAGAAAGACAAAAGCCAGGAGAGTATGCTAAAT   | [2011] |
| Rhinolophus  | CTTTCCTGTGGTTTGTGAGAAAGACGAAAATCCAGGAGATTATGCCAAAT  | [2032] |
| Rousettus    | TTTTTCCTGTGGTTTGCAGAAAGACAGAAAAGCCAGGAGATTATGCCAAAT | [2002] |
| NycterisT    | ATTTTCCTGTCTTTGTGAGAAAGACATAAAGCCAGGAGAATATGCCAAAG  | [2002] |
| Nyctimene    | CTTTCCTGTGGCTTATGAGAAAGACAAAAGCCAGGAGATTATGCCAAAT   | [2011] |
| Mole         | CTTAACTGTGGCTTGTGAGAAAGACGAAAATCCAGGAGATTATGCCAAAT  | [2029] |
| Horse        | CTTTCCTGTGATTTGTGAGAAAGATAAGAAGCCAGGTGACTATGTCAAAT  | [2038] |
| Desmodus     | CTTTCCTGTGGTTTGTGAGAAAGACAAAAGCCAGGAGAGTATGCCAAAT   | [2005] |
| Rhinopoma    | CTTTCCTGTGATTTCATGAGAAAGAAAAAAGCCAGAAGATTATGCCAAAT  | [2035] |
| Emballonura  | CTTTCCTGTCTTTTGTGAGAAAGACAAAAGCCGGGAGAATATGCCAAAT   | [2008] |
| Cow          | CTTTCCTGTGGCTGATCAGCAAGATAGGACGCCAGGTGACGATGCCAAAT  | [2014] |
| Pangolin     | CCCTCTTGTGGTTAGTCAGAAAGATGAGAAGCCAGGTGATTATGTAATAAT | [2014] |
| Whale        | CTTCCCTGTGTGGTCAAAAAGATAAGAAGCCAGGATCATGCCAAAC      | [2017] |

|   |      |      |      |      |       |
|---|------|------|------|------|-------|
| [ | 2060 | 2070 | 2080 | 2090 | 2100] |
| [ | .    | .    | .    | .    | .]    |

|              |                                                       |        |
|--------------|-------------------------------------------------------|--------|
| Tonatia      | ATACTATGAAAGGAATCTCTAAGCCTTGTGAGTATCTTCGTTTCAGAGGC    | [2049] |
| Myotis       | ACAGCATAAAAAGGAACCTCTATGCATTGCC?GTCCTCTCAGTTTCAGAGGC  | [2064] |
| Tadarida     | GTAGCATAAAAAGGAACCTCTAGCCTTTGTGACGCCACCTCAGTTTCAGAGGC | [2055] |
| Taphozous    | ACAAATAAAAAGGAATCTCTAGGCTTTGTGAGTATCTCAGTTTCAGAGGC    | [2070] |
| Megaderma    | ATACCAAAAAAGGAGTCTCTAGGCTTCGTCAGTCATCTCAGATCAGAGGC    | [2058] |
| Cynopterus   | ATGGCATAAAAAGGAGTCTCTAGGCTTTGTGAGTATCTCAGTTTCAGAGGC   | [2055] |
| Pteropus     | ATGGCATAAAAAGGAGTCTCTAGGCTTTGTGAGTATCTCAGTTTCAGAGGC   | [2040] |
| Hipposideros | ACAGCACAAAAGGAGTCTCTAGGCTTTGTCAATCATCTCTGTTTCAGAAGC   | [2079] |
| Cat          | GTAGCATAAAAAGGAGTCCCTGGGCTCTGTCAGTCATCTCAGTTTCAGAGGC  | [2085] |
| Human        | GTAGTATCAAAGGAGGCTCTAGGTTTTGTCTATCATCTCAGTTTCAGAGGC   | [2082] |
| Mouse        | GTGAT-----AGAGGTTGTAGGCTTTGTCCATCATCTCATTACAGAAGC     | [2040] |
| Flyinglemur  | TTAGCATAAAAGGAGTCTCTAGGCTTTGTGAGTATCTCAGTTTCAGAGGC    | [2088] |
| NycterisG    | ATACAACAAAAGGAATCTCTAGGCTTTGTGAGTATCTCAGTTTCAGGAAC    | [2052] |
| Antrozous    | ACAGCATAAAAAGGAACCTCTGGGCATGGTCAGTCCTCTGGGTTTCAGAGGC  | [2061] |
| Rhogeessa    | GCGGCATAAAAAGGAACCTCTAGGCTTTGTGAGTATCTCAGTTTCAGAGGC   | [2061] |
| Noctilio     | ATAGTGTGGAAGGAATCTCTAGGCTTTGTGAGTATCTCAGTTTCAGAGGC    | [2061] |
| Natalus      | ATAGCATAAAAAGGAACCTCTAGGCTTTGTGAGTATCTCAGTTTCAGAGGC   | [2061] |
| Rhinolophus  | ATAGCATAAAAAGGAGTCTCTGGACTTTGTCAATCATCTCTGTTCAAAGGC   | [2082] |
| Rousettus    | ATGGCATAAAAAGGAGTCTCTAGGCTTTGTGAGTATCTCAGTTTCAGAGGC   | [2052] |
| NycterisT    | ATACAACAAAAGGAATCTCTAGGCTTTGTCAATCATCTCAGTTTCAGGGAC   | [2052] |
| Nyctimene    | ATGGCATGAAAGGAGTCTCTAGGCTTTGTGAGTATCTCAGTTTCAGAGGC    | [2061] |

|             |                                                       |        |
|-------------|-------------------------------------------------------|--------|
| Mole        | GTAGCATAAAAGGAGTCTCTAGGCTTTGTGTCAGTCATCTCAGTTCAGAGGC  | [2079] |
| Horse       | GTAGCACAAAAGAACCTCTAGGCTTTGTGTCAGTCATCTCAGTTCAGAGGC   | [2088] |
| Desmodus    | ATAGTCCGAAAAGAACCTCTAGTCCCTTGTGTCAGTCATCTCAGTTAGAGGC  | [2055] |
| Rhinopoma   | ATAGCATAAAGGGAATCTTTAGGCTTTGTGTCAGTCATCTCAGTTCAGAGGC  | [2085] |
| Emballonura | ACAGTATAGAAGGGATCTCTAGGCTTTGTGTCAGTCACCTCAGATCAGAGGC  | [2058] |
| Cow         | GTAGCGCAAAAAGAAGTAACTAGGGTTTGTGTCAGTCATCACAGTTGAGAGGC | [2064] |
| Pangolin    | TTGGCATAAAAGGAGTCTCTACGCATTGTGTCAGTCATCTCAGTTCAGAGGC  | [2064] |
| Whale       | GTAGCCCAAAAAGAGTAACTAGGCTTTGTGTCAGTCATCACAGTTCAGAAGC  | [2067] |

[ 2110 2120 2130 2140 2150 ]  
[ . . . . . ]

|              |                                                       |        |
|--------------|-------------------------------------------------------|--------|
| Tonatia      | AATGAAACTAACTCACTATTGAAAATAAATATGGGATTTACAAAACCC      | [2099] |
| Myotis       | AACAAAACCTGAACTCACTATTACAGATAAATATGGACTTTCCCAAACCC    | [2114] |
| Tadarida     | AACGAAACTGAACTCACTATTGCAAAATAAACCCGGAATTTACGAAAACCC   | [2105] |
| Taphozous    | AATGAAACTGAACTCACTATTGAAAATAAACACAGAATTTTACAAAACCC    | [2120] |
| Megaderma    | AACAAAACCGAACTCACTGTTACAAAATAAACATGGAATTTCTCAAAAACCC  | [2108] |
| Cynopterus   | AATGAAACTGAGCTCACTATTGCAAAATAAACTTGGACTTTACAAAACCC    | [2105] |
| Pteropus     | AATGAAACTGAACTCACTATTGCAAAATAAACTTGGAAATTTACAAAACCC   | [2090] |
| Hipposideros | AACGAAACTGAACTCACTATTGCAAAATAAACATGGAATTTCTCAAAAACCC  | [2129] |
| Cat          | AATGAAACTGAACTCTTTATTGCAAAATAAACATGACATTTCAAAAACCC    | [2135] |
| Human        | AACGAAACTGGACTCATTACTCCAAATAAACATGGACTTTTACAAAACCC    | [2132] |
| Mouse        | GGGGAGAATGGACTCAGCGCCACAGGTAAATCAGGAATTTACAAAACCTC    | [2090] |
| Flyinglemur  | AATGAAACTGAACTCATTACTGCAAAATAAACATGGAATTTTACAAAACCTC  | [2138] |
| NycterisG    | AACAAAACCTGAACTCACTCTTGGAAAATAAATACAGAATTTACAAAACCC   | [2102] |
| Antrozous    | AAAGAAACTGAACTCGCTATCGCAGATGTACATGGAATTTACAAAACCC     | [2111] |
| Rhogeessa    | AAAGACTGAACTCACTATCGCCGATAAACATGGAATTTACAAAACCC       | [2111] |
| Noctilio     | AATGAAACTGAACTCACTATTGAAAGGAAACACAGAATTTACAAAACCC     | [2111] |
| Natalus      | AACGAAACTGAACTCACTATTGCAAAATAAACACAGAATTTACAAAACCC    | [2111] |
| Rhinolophus  | AACAAAACCTGAACTCACTATTGCAAAATAAACATGGAATTTGCTGAAAACCC | [2132] |
| Rousettus    | AATGAAATGGAACCTCACTATTGCAAAATAAACTTAGAATTTACAAAACCC   | [2102] |
| NycterisT    | AACGAAACTGAGTTCATTAATTGAAAATAAATACAGAATTTACAAAACCC    | [2102] |
| Nyctimene    | AATGAAACTGAACTCACTATTGCAAAATAAACTTGGAAATTTACAAAACCC   | [2111] |
| Mole         | AACGAAAACAGAAAGTCAATTGTTGCAAAATAAACGTTAATCTTACAAAACCC | [2129] |
| Horse        | AACGAAAC?GAACTTATACTGCAAAATAAACATGGAATTTACAAAACCC     | [2138] |
| Desmodus     | AATGAAACTAACTCACTATTGAAAATAAATACAGCATTTACAAAACCC      | [2105] |
| Rhinopoma    | AACGAAACTGAACTCACTACTGCAAAATAAACCTGCAATTTCTCAAAAACCC  | [2135] |
| Emballonura  | AACGAAACTGAACTAAGTCTGTTAAAATAAACACAGAATTTACAAAACCC    | [2108] |
| Cow          | CACAAAACCTGAACTTGTFTTTGCAAAATAAACAGGGTTTACAGAAAACCC   | [2114] |
| Pangolin     | AATAAACTGAACTTATTTTGGCAAAATAAACCTGGAATTTACAAAACCC     | [2114] |
| Whale        | AACAAAACCTGAGTTCATTAATTGCAAAATAAACATGGGATTTACAAAACCC  | [2117] |

[ 2160 2170 2180 2190 2200 ]  
[ . . . . . ]

|              |                                                      |        |
|--------------|------------------------------------------------------|--------|
| Tonatia      | CTATCACATACCACCCATTTCTCCCCTCAGGTCATCTGTTAAAACCTACAA  | [2149] |
| Myotis       | ATATCATATACCATCCATTTCTCCCATCAAGTCATTTGTTAAAACCTGTAA  | [2164] |
| Tadarida     | ATATCATATACCATCCATTTCTCCCATCAGGTCCTTTGTTAAAACCTATAA  | [2155] |
| Taphozous    | ATATCATATATACCACCCATTTCTCCCATCAGGTCATCTGTTAAAACGATAA | [2170] |
| Megaderma    | ATATCATATACCACCCATTTCTCCCATCAGGTCATCTGTTAAAACCTATAT  | [2158] |
| Cynopterus   | ATATCATATGCCATCCATTTCTCCCATCAAGTCATCTGTTAAAACCTATAT  | [2155] |
| Pteropus     | ATATCATATGCCATCCATTTCTCCCATCAAGTCATCTGTTAAAACCTACAT  | [2140] |
| Hipposideros | ACATAATATACCACATATTTCTCCCATCAGGTCATCTGTTAAAACCTGTAT  | [2179] |
| Cat          | TTATCATATACCACCCATTTCTCCCATCAGATCATCTGTTAATGCTGTAT   | [2185] |
| Human        | ATATCGTATACCACCCATTTCTCCCATCAAGTCATTTGTTAAAACCTAAAT  | [2182] |
| Mouse        | ACATTTTAAACAATCAGTTTCTCCCATCAGGTCATCTATAAAAACCTGACA  | [2140] |
| Flyinglemur  | ATGTCATATGTCATCACTTTCCCCATCAGGTCATCTGTTAAAATTAAT     | [2188] |
| NycterisG    | ATATCATATACCACCCATCTCTCCCATTAGGTTATCTAGTAAAACCTGTAA  | [2152] |
| Antrozous    | ATATCATATACCATCCATTTCTCCCATCAGGCCATTTGTTAAAACCTGTAA  | [2161] |
| Rhogeessa    | ATATCATATACCATCCATTTCTCCCATCAGGCCATTTGTTAAAACCTGTAA  | [2161] |
| Noctilio     | TTATCATATACCACCCATTTCTCCCATCTGGTCATCTGTTAAAACCTATAA  | [2161] |
| Natalus      | ATATCATATACCATCCATTTCTCCCATGAAAGTCATCTGTTAAAACCTATAA | [2161] |
| Rhinolophus  | ATATAGTATACCACATATTTCTCCCATCAGGTCATCTATTTAAAACCTATAT | [2182] |
| Rousettus    | ATATCATATGCCATCCATTTCTCCCATCAAGTCATCTGTTAAAACCTACAT  | [2152] |
| NycterisT    | ATATCATATACCATGCATCTCTCCCATTAGGTTATCTATTTAAAACCTGTAA | [2152] |
| Nyctimene    | ATATCATATGCCATCCATTTCTCCCATCAAGTCATCTGTTAAAACCTATAT  | [2161] |
| Mole         | ATATCTTATTCACCACCTTTCTTCAATTCAGTCATCTGTTAAAAGTGTCT   | [2179] |
| Horse        | ATATCATATACCATCACTTTCTCCCATCAGGTCATCTGTTAAAACCTGTAT  | [2188] |
| Desmodus     | ATATCATATACCATCCATTTCTCCCCTCAGGTCATCTGTTAAAACCTGTAA  | [2155] |
| Rhinopoma    | ATATCATATACCATCTATTTCTCCCATCAGGTCATCTGTTAAAACCTATAT  | [2185] |
| Emballonura  | CTGTCATGTACCATACATTTCTCCCATCAAGTCATCTGTTAAAACCTGTAA  | [2158] |
| Cow          | AAATCTTATACCATCACTTTCTCCCATCAAGTCATCTGTTAAAACCTATAT  | [2164] |
| Pangolin     | ATATCATATATCATCAATTTCTCCCATCAGGTCATCTGTTAAAATAATAT   | [2164] |

Whale ATATCTTATACCATCACTTTCTCCCATCAGGTCATCTGTAAAACCTATAT [2167]

[ 2210 2220 2230 2240 2250 ]  
[ . . . . . ]

Tonatia GTAAGAAGAACCCTGTCAGAGGAGAAGTGTGAGGAACATTCAGTGTACACCT [2199]  
Myotis GTAAGAAAAACCTGTCAAAGGAAAAAGTTTGAGGAACATTTAGTGTACACCT [2214]  
Tadarida ATAAGAAAAACCTGTCAGAGGAAAAGTTTGAGGAACATTCAGTGTACACCT [2205]  
Taphozous GTAAGAAAAACCTGTCAGAGGAAAAGTTTGAGGAACAGTCACTGTACACCT [2220]  
Megaderma GTAAGAAAAACCTGTCAGAGGAAAACCTTGAGGCATATTTGGTGTACACCT [2208]  
Cynopterus GTAAGAAAAATCTGTCAGAGGAAAAGTTTGAGGAACATTCATATTCCT [2205]  
Pteropus GTAAGAAAAATCTGTCAGAGGAAAAGTTTGAGGAACATTCATATTCCT [2190]  
Hipposideros GTAAGAAAAACCTGTCAGAGGAAAACCTTGAGGAATATCCAGTGTACACCT [2229]  
Cat GTAAGAAAAACCTGTCAGAGGAAAAGTTTGAGCAGCGTTCAATGTACACCT [2235]  
Human GTAAGAAAAATCTGTCAGAGGAAAACCTTTGAGGAACATTCATGTACACCT [2232]  
Mouse ATAGGAAACCTCTGACAGAGGACGATTTGAGAGACATACATCACT [2190]  
Flyinglemur GTAAGAGAACCCTGTCAGAGGAAAAGTTTGAGGAACATTCAGTGTACACCT [2238]  
NycterisG GTAAGAAAAACCTGTCAGAGGAAAAGTTTGAGGAACATTCATGTCTCCT [2202]  
Antrozous GTAAGAAAAACCTGTCAGAGGAAAAGTTTGAGGAACATTCAGCGTACACCT [2211]  
Rhoageessa GTAAGAAAAACCTGTCAGAGGAAAAGTTTGAGGAACATTCAGTGTACACCT [2211]  
Noctilio ATAAGAAAAACCTGTCAGAGGAAAAGTTTGAGGAACATTCATGTACACCT [2211]  
Natalus GTAAGAAA---CCTGTCGAGGAAAAGTTTGAGGAACACTCAGTGTACACCT [2208]  
Rhinolophus GTAAGAAAAACCTGTCAGAGGAAAACCTTGAGGAACATTCAGTGTACACCT [2232]  
Rousettus GTAAGAAAAATCTGTCAGAGGAAAAGTTTGAGGAACATTCATATTCCT [2202]  
NycterisT GTAAGAAAAACCTGTCAGAGGAAAAGTTTGAGGAACATTCATGTCTCCT [2202]  
Nyctimene GTAAGAAAAATCTGTCGAGGAAAAGTTTGAGGAACATTCATATTCCT [2211]  
Mole GTAAGAAAAACCTGTCGAGGAAAAGCTTGAGGAACACTCATGGTCAACC [2229]  
Horse GTAGAAAAACCTGTCAGAGGAAAAGCTTGAGGAACAGTCACTGTACACCT [2238]  
Desmodus GTAAGAAAAACCTGTCAGAGGAAAAGTTTGAGGAACATTCAGCGTACAGT [2205]  
Rhinopoma GTAAGAAAAACCTGTCAGAGGAAAACCTTTGAGGAACATTCAGTATACACCT [2235]  
Emballonura GTAAGAAAAACCTATCAGAGGAAAAGTTTGAGGAACATTTAATGTACACCT [2208]  
Cow GTAAGAAAAACCTGTCAGAGGAAAAGTTTGAGGAACATTCAGTGTACACCT [2211]  
Pangolin GTAAGAAAAACCTGTCAGAGGAAAAGCTGTGGAACATTCAGTGTACATG [2214]  
Whale GTAAGAAAAACCTGTCAGAGGAAAAGTTTGAGGAACCTGTAAGGTACACCT [2217]

[ 2260 2270 2280 2290 2300 ]  
[ . . . . . ]

Tonatia GCCAGAGCCGTGGGACCTGAGAACATCATTACAGGTACAGCGGGCACTCC [2249]  
Myotis GAAAGAGCAATGGGAAATGAG---AACATTCAAAGTACAGTGTAGCCCAAT [2261]  
Tadarida GAAAGAGCAATGAGAAATGAG---AATATTCTAAGTACAGTGTAGCCCAAT [2252]  
Taphozous GAAAAAGCAATGGGAAATGAGAACATCATTCAAAGTACAGTGTAGCACAAT [2270]  
Megaderma GAAAGAGCAATGGGAAATGAGAGCATTGTTCAAAGTACAGTGTAGCACAAT [2258]  
Cynopterus GAAAGAGCAATAGGAAATGAGACCATCATTCAAAGTACAGTGTGGCACAAT [2255]  
Pteropus GAAAGAACAAATAGGAAATGAGACCATCATTCAAAGTACAGTGTGGCACAAT [2240]  
Hipposideros GAAAGAGCAATGGGAAATGAGAGCATTCAAAGTACAGTGTAGCACAAT [2279]  
Cat GAAAGAGCAGTGGGAAATGAGAGCATTCAAAGTACAGTGTAAACACAAT [2285]  
Human GAAAGAGAAATGGGAAATGAGAACATT---CAAAGTACAGTGTAGCACAAT [2279]  
Mouse GAGATGGCGGTGGGAAATGAGAACATTCTTCAGAGTACAGTGTACACACAGT [2240]  
Flyinglemur GAAAGAGCAATGGCAAACAAGAGAATCATTCAAAGTACAGTGTAAACACAAT [2288]  
NycterisG GAAAGAGCAGTGGAAAGTGTAGAACATCATTCAAAGTACAGTGTGGCACAAT [2252]  
Antrozous GAAAGAGCAATGGGAAATGAG---AGCGTTACAGTGTAAATGAGCCCAAT [2258]  
Rhoageessa GAAAGAGCAACCGGAAATGAG---AGTGTTCAGAGTACATGTAGCCCAAT [2258]  
Noctilio GAAAGAGCAATGGGAAATGAGAACATCATTCAAAGTACAGTGTAGCACAAT [2261]  
Natalus GAAAGAGCAATGGGAAATGAGAACATT---CAAAGTACAGTGTAGCCCAAT [2255]  
Rhinolophus GAAAGAGCAATGGGAAATGAGAACATTCAGAACATTCAGAACATTCAGTGTAGCACAAT [2282]  
Rousettus GAAAGAACAAATAGGAAATGAGACCATCATTCAAAGTACAGTGTGGCACAAT [2252]  
NycterisT GAAAGAGCAGTGGGAAATGAGAACATCATTCAAAGTACAGTGTGGCACAAT [2252]  
Nyctimene GAAAGAGCAATGGGAAATGAGACCATCATTCAAAGTATAGTGTGGCACAAT [2261]  
Mole GAAAGAGAACAGGAAACCGGAGCATTGAAAGTACAGTGTAGCAGGGT [2279]  
Horse GAAAGAGCAATGGGAAATGAGAGCATTGTTCAAAGTACAGTGTAGCACAAT [2288]  
Desmodus GAAAGAGCAGTGGGAAATGAGAACATCATTCAAAGTACAGTGTAGCCCAAT [2255]  
Rhinopoma GAAAGAGCAATGGGAAATGAGAACATCATTCAAAGTACAGGAGCACAAT [2285]  
Emballonura GAAAGAGCATTGGGAAATGAGAACATCATTCAAAGTACAGTGTAAAGCACAAT [2258]  
Cow GAAAAAACATTGGGGAGTGTAGAGCATTCAAAGTGTAGTGTAGCACAAT [2261]  
Pangolin GAAAAAGCAGTGGGAAACAAGAGCATTCAAAGTACTGTGTAGCACAAT [2264]  
Whale GAAAGAGCAATGGAAAACGAGAGCATTCAAAGTACAGTGTAGCACAAT [2267]

[ 2310 2320 2330 2340 2350 ]  
[ . . . . . ]

Tonatia TAGCCAGAACAAAACAGGAAAGTGCAGGAGAGGAGCAGCTCGAGCG [2299]  
Myotis TAGCCTAAGTAACATTAGAGAAAGCGCTTTTAAAGAAAGCAGCTCAAGCA [2311]

|              |                                                      |        |
|--------------|------------------------------------------------------|--------|
| Tadarida     | TAGCCTAAATAAC--AGAGAAAGCACTTTTAAAGAAGGCAGCTCAAGCA    | [2299] |
| Taphozous    | TAGCCAAAATAATGTTAGAGAAAAGAGCTGTTAAAGAAGGCAGCTCAAGCA  | [2320] |
| Megaderma    | TAGCCAAAAGTAACATTAGAGAAAAGCACTTTTAAAGAGGGCAGCTCCAGCA | [2308] |
| Cynopterus   | TAGCCAAAATAACATTAGAGAAAAGCACTTTTAAAGAAGGCAGCTCAAGCG  | [2305] |
| Pteropus     | TAGCCAAAATAACATTAGAGAAAAGCACTTTTAAAGAAGGCAGCTCAAGCA  | [2290] |
| Hipposideros | TAGCCAAAATAACATTAGAGAAAAGCACTTTTAAAGAAGGCAGCTCAAGCA  | [2329] |
| Cat          | TAGCCAAAATAACATTAGAGAAAACACTTTTAAAGAAGTTAGCTCAAGCA   | [2335] |
| Human        | TAGCCGTAATAACATTAGAGAAAATGTTTTTAAAGAAGCCAGCTCAAGCA   | [2329] |
| Mouse        | TAGCCTGAATAAC--AGAGGAAATGCTTGTCAAGAAGCCGGCTCGGGCA    | [2287] |
| Flyinglemur  | TAGCCAAAATAACATTAGAGACAGTGCTTCTAAAGAAGCCAGCTCAAGCA   | [2338] |
| NycterisG    | TAGTCAAATGCCATTAGAG-----AAGGGAGCTCCAGCA              | [2287] |
| Antrozous    | TAGCCTAAGTGACATCAGAGAAAAGCGCTTTTAAAA--GCAGCTCAAGCA   | [2305] |
| Rhogeessa    | TAGCCTAAGTAACATCAGAGAAAAGCACTTTTAAAGAAGGCAGCTCAAGCG  | [2308] |
| Noctilio     | TAGCCAGAGTAACATTGGAGAAAAGTACTTTTAAAGAAGGCAGCTCAAGCA  | [2311] |
| Natalus      | TAGCCTAAAATAACATTAGAGAAAAGCACTTTTAAAGAAGGCAGCTCAAGCA | [2305] |
| Rhinolophus  | TAGCCAAAATAACATTAGAGTAAGCACTTTTAAAGAAGGCAGCTCAAGTA   | [2332] |
| Rousettus    | TAGCCAAAATAACATTAGAGAAAAGCACTTTTAAAGAAGGCAGCTCAAGCA  | [2302] |
| NycterisT    | TAGTCAAATGCCATTAGAGAAAAGCACTGTTAAAGAAGGCAGCTCCAGCA   | [2302] |
| Nyctimene    | TAGCCAAAATAACATTAGAGAAAAGCACTGTTAAAGAAGGCAGCTCAAGCA  | [2311] |
| Mole         | TAGCCAAAATAACATTAGAGAAAATGCTTTTAAAGAAGTCAGCTCAAGTA   | [2329] |
| Horse        | TAGCCAAAATAACATTAGAGAAAAGCACATTGAAAGAAGTCAGCTCAAGC-  | [2337] |
| Desmodus     | TAGCCAGAATAAACTAGAGAAAAGTACTGCTAAAGAAGGCAGCTCCGTGCA  | [2305] |
| Rhinopoma    | TGGCCAAAATAACATTAGAGAAAAGCAGTATTAAAGAAGGCAGCACAAGCA  | [2335] |
| Emballonura  | TAGCCAAAATAACATCACGGAAGAAGTGTAAAGAAGGCAGCTCGGGCA     | [2308] |
| Cow          | CAGCCAAAATAACATTCAAGAAAAGCACTTTTAAAGAAGTCAGCTCAAACA  | [2311] |
| Pangolin     | TAGCCAAAATAACATTAAAGGAAAACAATTTTAAAGATGGCAGCTCCAGCA  | [2314] |
| Whale        | TAGCCAAAATAACATTGAGAAAAGCACTTTTAAAGAAGTCAGCTCAAGCA   | [2317] |

[ 2360 2370 2380 2390 2400 ]  
[ . . . . . ]

|              |                                                     |        |
|--------------|-----------------------------------------------------|--------|
| Tonatia      | GCACTAACGAAGTAGGCTCC-----                           | [2319] |
| Myotis       | GTACTAATGAAGGGGCTCTAGTATCAATGAAGTAGGTTCC-----       | [2352] |
| Tadarida     | GTACTAATGAAGTAGGCTCTAGTACCAATGAAGTAGGTTCC-----      | [2340] |
| Taphozous    | GTACTAACGAAGTAGGCTCTAGTATCGATGAAGCAGGTTCC-----      | [2361] |
| Megaderma    | ATATTTATGAAGCAGATTCCAGTGCTAATGAAGTAGGCTCTAGTATCAGT  | [2358] |
| Cynopterus   | GTATTTATGAAGCAGGTTCCAGTACCAATGAAGTAGGCTCTAGTGTCAAT  | [2355] |
| Pteropus     | GTATTTATGAAGCAGGTTCCAGTACTAACGAAGTAGGCTCTAGTGTCAAT  | [2340] |
| Hipposideros | AT?TTTATGAAGCAGATTCCAGTACTAATGAAGTAGGCTCTAGTATCAAT  | [2379] |
| Cat          | GTGTTAATGAAGTAGGTTCCAGTGCTAATGAAGTAGGCTCTAGCATTAAAT | [2385] |
| Human        | ATATTAATGAAGTAGGTTCCAGTACTAATGAAGTAGGCTCCAGTATTAAT  | [2379] |
| Mouse        | GTATTCATGAAGTATGTTCC-----                           | [2307] |
| Flyinglemur  | GTATTAATGAAGTAGGTTCCAGTACTAATGAAGTAGGCTCCAGTATTAAT  | [2388] |
| NycterisG    | GTACTAATGAAGTAGGTTCCAGT-----                        | [2310] |
| Antrozous    | GTGCTAATGAAGGAGGCTCTAGTATCAATGAAGTAGATTCC-----      | [2346] |
| Rhogeessa    | GTACCAATGAAGGAGGCTCTAGTAACAATGAAGTAGGTTCC-----      | [2349] |
| Noctilio     | GCACTAACGAAGTGTGCTCTAGTATTAATGAAGTAGGTTCC-----      | [2352] |
| Natalus      | GCCTAATGAGGTAGGCTCTAGTATCAGTGAAGTAGGTTCC-----       | [2346] |
| Rhinolophus  | ATGTTAATGAAGCAGATTCCGGTACTAATGAAGTAGGCTCTAGTATCAAT  | [2382] |
| Rousettus    | GTATTTATGAAGCAGGTTCCAGTACTAACGAAGTAGGCTCTAGTGTCAAT  | [2352] |
| NycterisT    | GTACTAATGAAGTAGGTTCCAGT-----                        | [2325] |
| Nyctimene    | GTATTTATGAAGCAGGTTCCAGTACTAACGAAGTAGGCTCTAGTGTCAAT  | [2361] |
| Mole         | GTATTAACGAAGTAGGTTCCAGTACTAACGAAGCTGACTCTAGTATTAAT  | [2379] |
| Horse        | -----AGTATTAATGAAGTAGGCTCTAGTATTAAT                 | [2367] |
| Desmodus     | GTACTAATGAAGTAGGCTCC-----                           | [2325] |
| Rhinopoma    | ATATTTATGAAGCAGATTCTAGTACTAATGAAGTAGGCTCTAGTATCAAT  | [2385] |
| Emballonura  | GTACTAATGAAGTAGGCTCTAGTATCAGTGAAGTAGGATCC-----      | [2349] |
| Cow          | GTGTTAATGAAGTAGGTTCCAGTACTAATGAAGTAGGCTCTAGTGTAAAT  | [2361] |
| Pangolin     | GCATTAATGAAATAGGTTCCAGTACTAATGAAGTAGGCTCTAGTATTAAT  | [2364] |
| Whale        | GTATTAATGAAGTAGGTTCCAGTACTAATGAAGTAGGCTCTAGTATTAAT  | [2367] |

[ 2410 2420 2430 2440 2450 ]  
[ . . . . . ]

|              |                                                      |        |
|--------------|------------------------------------------------------|--------|
| Tonatia      | -----AGTGGTGAAAACGGTCAAGCAGAGCCAGGCACAAACAG          | [2357] |
| Myotis       | -----AGTGGTGAAAACATTCATGCAGAAGTAGATATAAAACAA         | [2390] |
| Tadarida     | -----AGTGGTGAAAACATTCAGCAGAAGTAGGTTAGAAAACAG         | [2378] |
| Taphozous    | -----AGTGGTAAAACATTCAGCAGAAGTAGATAGAAAACAG           | [2399] |
| Megaderma    | GAGGTAAGTTCCAGTGGTGAGAACATTCAAACAGAAGTAGGTTAGAAAACCA | [2408] |
| Cynopterus   | GAAGTAGGTTCCAGTGGTGAAAACATTCAGCAGAAGTAGGTTAGAAAACAG  | [2405] |
| Pteropus     | GAAGTAGGTTCCAGTGGTGAAAACATTCAGCAGAAGTAGGTTAGAAAACAG  | [2390] |
| Hipposideros | GAAGTAGGTTCCAGTGGTGAAAACATTCAGCAGAAGTAGGTTAGAAAACAG  | [2429] |
| Cat          | GAAGTAGGTTCCAGTGGTGAAAACATTCAGCAGAAGTAGGTTAGAAAACCG  | [2435] |

|             |                                                     |        |
|-------------|-----------------------------------------------------|--------|
| Human       | GAAATAGGTTCCAGTGTGAAAAACATTCAAGCAGAAGCTAGGTAGAAACAG | [2429] |
| Mouse       | -----ACTGGTGACTCCTTCCCAGGACAAGCTAGGTAGAAACAG        | [2345] |
| Flyinglemur | GAAGTAGGTTCCAGTGGTAAAAACATTCAAGCAGAAGCTAGGTAGAAACAG | [2438] |
| NycterisG   | -----GGTAAAAACATTCAAGCAGAATTAAGTAGA-----            | [2340] |
| Antrozous   | -----AGTGGTAAAAACATTTCATGCAGAACGAGCTATAAACAA        | [2384] |
| Rhogeessa   | -----AGTGATAAAAACATTTCATGCAGAACGAGCTATAAACAA        | [2387] |
| Noctilio    | -----AGTGGTAAAAATATTCAAGCAGAAGTGGGCAGAAACAG         | [2390] |
| Natalus     | -----AGTGGTAAAAACATTCAAGCAGAAGCTAGGTAGAAACAG        | [2384] |
| Rhinolophus | GAAGTAGGTTCCAGTGGTAAAAACATTCAAGCAGAAGCTCAGTAGAAACAG | [2432] |
| Rousettus   | GAAGTAGGTTCCAGTGGTAAAAACATTCAAGCAGAAGCTAAGTAGAAACAG | [2402] |
| NycterisT   | -----GGTAAAAACATTCAAGCAGAAGCTAAGTAGA-----           | [2355] |
| Nyctimene   | GAAGTAGGTTCCAGTGGTAAAAACATTCAAGCAGAAGCTAAGTAGAAACAG | [2411] |
| Mole        | GAAGTAGGTTCCAGTGGTAAAAATATTCAAGCTGAAGTAGTAGAAACAG   | [2429] |
| Horse       | GAAGTAGGTTCCAGTGGTGAACACATTCAAGCAGAAGCTAGGCAGAAACAG | [2417] |
| Desmodus    | -----AGTGGCGAAAATATTCAAGCAGAAGCTAGGCAGAAACAG        | [2363] |
| Rhinopoma   | GAAGTAGGTTCCAGTGGTGAACACATTCAAGCAGAAGCTAGGTAGAAACAG | [2435] |
| Emballonura | -----AGTGGTAAAAACAGTCAAGCAGAAGCTAGTAGAAAAAG         | [2387] |
| Cow         | GAAGTAGGTTCCAGTGGTAAAAACATTCAAGCAGAAGCTAGGTAGAAACAG | [2411] |
| Pangolin    | GAAGTAGGTTCCAGTGGTAAAAAATTCAAGCAGAAGCTAGGTAGAAACAG  | [2414] |
| Whale       | GAAGTAGGTTCCAGTGGTAAAAACATTCAAGCAGAAGCTAGGTAGAAACAG | [2417] |

[ 2460 2470 2480 2490 2500 ]  
[ . . . . . ]

|              |                                                          |        |
|--------------|----------------------------------------------------------|--------|
| Tonatia      | AGCATCAAAAATTAAGCGCTCTTCTCAGATCAGGGCTCATGCAACCTGAAG      | [2407] |
| Myotis       | AGGATCAAAAATTAAGTGTATGCTCAGATTAGGTCTCATGCAACCCGAAG       | [2440] |
| Tadarida     | AGGATCAAAAATTAAGTGTATGCTCAGATCAGGTCTCATGCAACCTGAAG       | [2428] |
| Taphozous    | AGGATCAAAAATTAAGTGTGTTCTCAGATTAGGTCTCATGCAACCCGAAG       | [2449] |
| Megaderma    | AGGACCAAAAATTAAGTGTGTGCTCAGATTAGGTCTCATGCAACCTCAAG       | [2458] |
| Cynoptyrus   | AGGACCAAAAATTAAGTGTGTGCTTCAATTGGGTCTCATGCAAGCCTGAAG      | [2455] |
| Pteropus     | AGGACCACAATTAAGTGTGTGCTTCAATTGGGTCTCATGCAAGCCTGAAG       | [2440] |
| Hipposideros | AGGACCGAAAATTAAGTGTGTGCTCGGATTAGGTCTCGTGAACCTGAAG        | [2479] |
| Cat          | AGGACCTAAGTTAAGTGTATGCTCAGGTTAGGTCTTATGCAACCTGAAG        | [2485] |
| Human        | AGGGCCAAAATTAAGTGTATGCTTAGATTAGGGGTTTTCGCAACCTGAGG       | [2479] |
| Mouse        | AGGGCCTAAGGTGAACACTGTGCCTCCATTAGATAGTATGCAGCCTGGTG       | [2395] |
| Flyinglemur  | AGGACCTAAAATTAAGTGTATGCTTAGATTAGGCCTCATGCAACCTGAAG       | [2488] |
| NycterisG    | -GGATCAAAAATTAAGTGTATGCTTAGTTTCAAGTTAGGTCTCATGCAACCTGAAG | [2389] |
| Antrozous    | AGGATCAAAAATTAAGTGTATGCTCAGATTAGGTCTCATGCAACCCGAAG       | [2434] |
| Rhogeessa    | AGGATCAAAAATTAAGTGTATGCTCAGATTAGGTCTCCTGCAACCTGAAG       | [2437] |
| Noctilio     | AGGATCAAGATTAAGTGTATGCTCAGATTAGGTCTTTCAGCAAGCCGAAG       | [2440] |
| Natalus      | AGGATCGAAAATTAAGTGTATGCTCAGATTAGGTCTCCTGCAACCTGAAG       | [2434] |
| Rhinolophus  | AGGACCAAAAATTAAGTGTGTGCTCAGATTAGGTCTCATGCAACCTGACG       | [2482] |
| Rousettus    | AGGGCCAAAATTAAGTGTGTGCTTCAAGTTGGGTCTCATGCAAGCCTGAAG      | [2452] |
| NycterisT    | -GGATCAAAAATTAAGTGTATGCTCAGGTTAGGTCTCATGCAACCTGAAG       | [2404] |
| Nyctimene    | AGGACCAAAAATTAAGTGTGTGCTTCAATTGGGTCTCATGCAAGCCTGAAG      | [2461] |
| Mole         | AGGACCTAAAATTAAGTGTATGCTCAGATTGGGTCTTATGCAACCTGAAG       | [2479] |
| Horse        | AGGACCTAAAATTAAGTGTATGCTCAGATTAGGTCTTATGCAACCTGAAG       | [2467] |
| Desmodus     | AGCATCAGAAATTAAGTGTATGCTCAGATTAGGTCTCATGCAACCTGAAG       | [2413] |
| Rhinopoma    | AGGACCGAAAATTAAGTGTGTGCTCAGATTAGGTCTCATGCAACCTGAAG       | [2485] |
| Emballonura  | AGAATCAAAAATTAAGTGTAGTCTCAGATTAGGTCTCATGCAAGCCTGAAA      | [2437] |
| Cow          | AGAACCTAAAATTAAGAGCTTTACTCGGATTAGGTCTTACGCAACCTGAAG      | [2461] |
| Pangolin     | AGGACCTAAAATTAAGTGTGTGCTCAGATTAGGTCTTATGCAACCTGAGG       | [2464] |
| Whale        | AGGACCTAAAATTAAGTGTGCTTTCAGATTAGGTCTTATGCAACCCGAAG       | [2467] |

[ 2510 2520 2530 2540 2550 ]  
[ . . . . . ]

|              |                                                         |        |
|--------------|---------------------------------------------------------|--------|
| Tonatia      | TCTGTAAGCCGAGTCTTCTCTGAGTAATTGTGAAGA-----TCCTGAA        | [2451] |
| Myotis       | TCTATAAGCCAAGCCTTCTCTGTAAGTAATTGTAAACA-----TCCTGAA      | [2484] |
| Tadarida     | TCTATAAGCCAAGCCTTCTCTGTAAGTAATTGTGAACA-----TCCTGAA      | [2472] |
| Taphozous    | TCTATAAGCCAAGCCTTCTCTATAAGTAATTGTAAACA-----TCCTGAA      | [2493] |
| Megaderma    | TCTATGTGCAAAAGCCTTCTCTGTAAGCAATTGTGAACA-----TTCTGAA     | [2502] |
| Cynoptyrus   | TCTATGAGCAAAGCCTTCTCTTAAGTAATTGTAAACA-----TTCTGAA       | [2499] |
| Pteropus     | TCTATAAGCAAAGCCTTCTCTTAAGTAATTGTAAACA-----TCCTGAA       | [2484] |
| Hipposideros | TCTATAGGCAAAGCCTTCTCTGTAAGTAATTGTCAACA-----TCCAGAA      | [2523] |
| Cat          | TCTATGAGCAAAGTCTTCTCTATAAGTAATTGTAAATG-----TCCAGAA      | [2529] |
| Human        | TCTATAAACAAAGTCTTCTCTGGAAGTAATTGTAAAGCA-----TCCTGAA     | [2523] |
| Mouse        | TCTGTGCAAGCAAGTCTTCTCTGTAAGTATG---AAGTA-----TCTTGAA     | [2436] |
| Flyinglemur  | TTTACAAGCAAATCTTCTCTTAGGTAATTGTAAACA-----TCCTGAA        | [2532] |
| NycterisG    | TCTATAAGCCAAGCCTTCTCTATAAATAGTTGTAAACA-----CCCTGAA      | [2433] |
| Antrozous    | TCTGTGAGCAAAGCCTTCTCTATAAGTAAGTAACTGTAAACA-----TCCTGAA  | [2478] |
| Rhogeessa    | TCTATAAGCCAAGCCTTCTCTATAAGTAAGTAACTGTAAACATCAACATCCTGAA | [2487] |
| Noctilio     | TCAATAAGCCAAGCCTTCTCAATAAATATCATAAACG-----TTCTGAA       | [2484] |

|             |                                                       |        |
|-------------|-------------------------------------------------------|--------|
| Natalus     | TCTATAAGCCAAGCCTTCTCTATAAGTAATTGTAAACA-----TCCTGAA    | [2478] |
| Rhinolophus | CCTGTAAGCAAAGCCTTCTCTATAAATAACTGTAAACA-----TCCTGAA    | [2526] |
| Rousettus   | TCTATAAGCAAAGCCTTT-----CTTGTAAACA-----TCCTGAA         | [2487] |
| NycterisT   | TCTATAAGCCAAGCCTTCTCTATAAGTAGTTGTAAACA-----CCCTGAA    | [2448] |
| Nyctimene   | TCTATAAGCAAAGCCTTCTCTATAAGTAATTGTAAACA-----TCCTGAA    | [2505] |
| Mole        | TCTATAAGCAAAGTCTTCTCTATAAAGTACTTGTAAACA-----TCCTGAA   | [2523] |
| Horse       | TCTATAAGCAAAGTCTTCTCTATAAGTAATTGTAAACA-----TCTGGAA    | [2511] |
| Desmodus    | TCTATAAGCCAAGTCTTCTCTATAAGTAATTGTAAAGA-----TCTGGAA    | [2457] |
| Rhinopoma   | TCTTTAAGCAAAGCCTTCTCTATAAGTAATTGTAAACA-----TCCTGAA    | [2529] |
| Emballonura | TCTATAAGCCCAGCCTTCTCTATAAGTAATTGTGAGCA-----CCCTGAA    | [2481] |
| Cow         | TCTATAAGCAAAGTCTTCTCTATAAGTAAGTACTGTCACCA-----TCCTGAA | [2505] |
| Pangolin    | CCTATAAGCAAATCTTCTCTATAAGTAATTGTAAACA-----CCCTGAA     | [2508] |
| Whale       | TCTATAAGCAAAGTCTTCTCTATAAGTAAGTACTGTCAACT-----TCCTGAA | [2511] |

[ 2560 2570 2580 2590 2600 ]  
[ . . . . . ]

|              |                                                     |        |
|--------------|-----------------------------------------------------|--------|
| Tonatia      | ATAAAAAGGCAAGAA--GATGGGGGAGTAGTGCAGGCTGTTAATGCAGA   | [2498] |
| Myotis       | GTAAAAAGGCAAGGAGACAACGAAGGACTAGTTCAGGCTGTTAATGCAGA  | [2534] |
| Tadarida     | ATAAAAAGGCAAGGAGAAAATGAAGGAGTAGTTCAGGCTGTTAATGCAGA  | [2522] |
| Taphozous    | ATAGAAAAGGCAAGGAGAAAATGAAGTAGTAGTTCAGGCTGTTAATGCA-- | [2541] |
| Megaderma    | ATAAAAAGGCAAGGAGAAAATGAAGGAGTAGTTGAGGCTGTTAATGCAGA  | [2552] |
| Cynopterus   | ATAAAAAGGCAAGGAGAAAATGAAGGAGTGGTTCAGGCTGTTAATGCAGA  | [2549] |
| Pteropus     | ATAAAAAGGCAAGGAGAAAATGAAGGAGTAGTTCAGGCTGTTAATGCAGA  | [2534] |
| Hipposideros | ATAAAAAGGCAAGGAGAAAATGAAGGAATAGTTCAGGCTGTTAGTGCAGA  | [2573] |
| Cat          | ATAAAAAGGCAAGGAGAAAATGAAGGAGTAGTTCAGTCTGTTAATGCAGA  | [2579] |
| Human        | ATAAAAAGCAAGAA--TATGAAGAAGTAGTTCAGACTGTTAATACAGA    | [2570] |
| Mouse        | ATAAAAAGCAGGAG-----GGTGAGGCTGTCTGTGCAGA             | [2471] |
| Flyinglemur  | ATA--AGGCAAGAAGAAAATGAAGGAATAGTTCAGGCTGTTAATACAAA   | [2579] |
| NycterisG    | ATAAAAAGCAAGGAGAAAATGAAGGAGTAGTTCAGGCTGTTAATGCAGA   | [2483] |
| Antrozous    | ATAAAAAGGCAAGGAGACAACGAAGCAGTAGTTCAGGCTGTTGATGCAGA  | [2528] |
| Rhogeessa    | ATAAAAAGGCAAGGAGACAGCGAAGCAGTAGTTCAGGCTGTTGATGCAGA  | [2537] |
| Noctilio     | ACAGAAAAGGCAAGGAGAAAATGGAAGAATAGTCCAACTGTCAATGCAGA  | [2534] |
| Natalus      | ATAAAAACTCAAGGAGAAAATGAAGGAGTAGTTCAGGCTGTTACTGTAGA  | [2528] |
| Rhinolophus  | ATAAAAAGGCAAGGAGAAAATGAAGGGGAGTTCAGGCTGTTAATGCAGA   | [2576] |
| Rousettus    | ATAAAAAGGCAAGGAGAAAATGAAGGAGTAGTTCAGGCTGTTAATGCAGA  | [2537] |
| NycterisT    | ATAAAAAGGCAAGGAGAAAATGAAGGAGTAGTTCAGGCTGTTAATGCAGA  | [2498] |
| Nyctimene    | ATAAAAAGGCAAGGAGAAAATGAAGTAGT---TCAGGCTGTTAATGCAGA  | [2552] |
| Mole         | GTTAAAAGGCAAGGAGAAAATGAAGGCATAGTTCAGGCTGTTACATACAGA | [2573] |
| Horse        | ATAAAAAGGCAAGGAGAAAAGGAA--GTAGTTCAGGCTGTTAACGCAGA   | [2558] |
| Desmodus     | ATAAAAAGGCAAGGGGAAGCTGGAGGAGTAGTTCAGGTTGGTCAACGCAGA | [2507] |
| Rhinopoma    | ATAAAAATGCAAGGAGAAAATGAAGTAGTTG---AGGCTGTTATGCAGA   | [2576] |
| Emballonura  | ATAAAAAGGCAAGGAGAAAATGAAGTAGTAGTTCAGGCTGTTA-----    | [2524] |
| Cow          | ATAAAAAGGCAAGGAGAAAATGAGGACATGCCTCAGGCTGTTAAGGCAGA  | [2555] |
| Pangolin     | ATAAAAAGCAAGGAGAAAAGAAAGGAGTAGTTCAGGTTGTTAATGCTGA   | [2558] |
| Whale        | ATAAAAAGGCAAGGAGAAAAGTGAAGGCACACTTCAGGCTGTTAATGCAGA | [2561] |

[ 2610 2620 2630 2640 2650 ]  
[ . . . . . ]

|              |                                                       |        |
|--------------|-------------------------------------------------------|--------|
| Tonatia      | TTTCTCTCCGTGTCAAATTTTAGATAACCTAGAACAACCTCTGGGAAGCA    | [2548] |
| Myotis       | CTTCCCTCCATGTCAAATTTTCAGATAACCTAGAACAACCTATGGGAAGTA   | [2584] |
| Tadarida     | TTTCTCTCCATGTCAAATTTTCAGATAACCTAGAACAATCTATGGGAAGTA   | [2572] |
| Taphozous    | -----TGTCAAATTTTCAGATAACCTAGAACAACCTATGGGAAGTA        | [2581] |
| Megaderma    | ATTCTCTCCATGTCAAATTTTCAGATAACCTGGAACAACCTATGGGAAGTA   | [2602] |
| Cynopterus   | TGTCTCTCA?GTCAAATTTTCAGATAACCTTAGAGCAACCTATGGGAACA    | [2599] |
| Pteropus     | TGTCTCTCTACGTCTAGATTTTCAGATAACCTTAGAGCAACCTATGGGAACA  | [2584] |
| Hipposideros | CTTCTCTCCATGTCAAATTTTCAGATAACCTAGAACAACCTACGGGAAGTA   | [2623] |
| Cat          | TTTTTCTCCATGTCTAATTTCCGATAATGTAGAACAACCTATGGAAAGTA    | [2629] |
| Human        | TTTCTCTCCATGTCTAATTTTCAGATAACCTTAGAACAACCTATGGGAAGTA  | [2620] |
| Mouse        | CTTCTCTCCATGTCTAATTTTCAGACCATCTTGGCAATCTATGAGTGGT-    | [2520] |
| Flyinglemur  | TCGTCTCTGTGCTAATTTTCACATAACCTCGAACAACCTATGGAAAGTA     | [2629] |
| NycterisG    | TACCTCTCCATGTCAAATTTTCAGATAACCTGGAACAACCAAGGAAGGTA    | [2533] |
| Antrozous    | TTTCCCTCCAGGTCAAATTTTCAGATAAATCTGGAACAACCTATGGAAAGTA  | [2578] |
| Rhogeessa    | TTTCCCTCTCATGTCAAATTTTCAGATAAATCTGGAACAACCTATGGAAAGTA | [2587] |
| Noctilio     | TTTCTCTCCATGTCAAATTTTAGATAACCTGGAACAACCTCTGGAAAGTA    | [2584] |
| Natalus      | TTTCTCTCCATGTCAAATTTTCACATAACCTAGAACAACCTATGGGAAGTA   | [2578] |
| Rhinolophus  | CTTCTCTCCATGTCTAATTTTCAGATCACTTAGAACAACCTATGGGAAGTA   | [2626] |
| Rousettus    | TGTCTCTCAACGTCTAGATTTTCAGATAACCTTAGAGCCACCTATGGGAACA  | [2587] |
| NycterisT    | TACCTCTCCATGTCT????????????????????????????????       | [2548] |
| Nyctimene    | TGTTTCTCCAGTCTAGATTTTCAGATAACCTTAGAGCAACCTATGGAAACCA  | [2602] |
| Mole         | TTTTTCTCCATGTCTAATTTTCAGATAACCAAGAACAACCTATGGGAAGTA   | [2623] |
| Horse        | CTTTTCTCCGTGTCTAATTTTCAGATAACCTAGAACAACCTATGGGAAGTA   | [2608] |



|             |                                                     |        |
|-------------|-----------------------------------------------------|--------|
| Desmodus    | TTTCTCTCCATGTCAAACCTTTAGATAACCTAGAACGACCTCTGGGAAGTA | [2557] |
| Rhinopoma   | TTTCCCTCCATGTCAAATTTTCAGATAACCTAGAACACCTATGGAAAGTA  | [2626] |
| Emballonura | ----GCGCATGTCAAATTTTCAGATAACCTAGAACACCTATGGAAAGTW   | [2569] |
| Cow         | TTTCTCCCATGTCTAATTTTCAGATAACCTCGAACACCTACGGGAAGCC   | [2605] |
| Pangolin    | TTTCTCTCCATGTCTAATTTTCAGATAACCTAGAACACCTATGGGAAGTA  | [2608] |
| Whale       | TTTCTCCCAAGTCTAATTTTCAGATAACCTAGAACACCTATGGGAAGAA   | [2611] |

[ 2660 2670 2680 2690 2700 ]  
[ . . . . . ]

|              |                                                    |        |
|--------------|----------------------------------------------------|--------|
| Tonatia      | GTCCCGCTTCTCGGGTTTGTTCGAGACCCAGACGACCTGTAAATGAT    | [2598] |
| Myotis       | GTCCTGTTTCTCAGGTTTGTTCGCGACACCGGATGACTTGTAACTGAT   | [2634] |
| Tadarida     | CTCCTGCTTCTCAGGTTTGTTCGAGACACCGATGACCTGTAAATGAT    | [2622] |
| Taphozous    | GTCCTGTTTCTCAGGCTTGTTCGAGACACCGATGACCTATTAGATGAT   | [2631] |
| Megaderma    | GTCATGCTTCTCAAATTTGTTCGAGACACCGGATGACCTGTAAACGAT   | [2652] |
| Cynopterus   | GTAATATTTCTCAGGTTTGTTCGAGACACCGGATGACCTGTAAATGAT   | [2649] |
| Pteropus     | GTAATGCTTCTCAGGTTTGTTCGAGACACCGGATGACCTGTAAATGAT   | [2634] |
| Hipposideros | GTCATGCTTCTCAGGTTTGTTCGAGACACCGGATGACCTGTAAATGAT   | [2673] |
| Cat          | GCCGCTGCTTCTCAGGTTTGTTCGAGACACCCAATGACCTATTAAATGGT | [2679] |
| Human        | GTCATGCATCTCAGGTTTGTTCGAGACACCTGATGACCTGTAGATGAT   | [2670] |
| Mouse        | --AAGGTTTTTCAGGTTTGTTCGAGACACCTGATGACCTGCTGGATGAT  | [2568] |
| Flyinglemur  | GTCATGCTTCCCAGGTTTGTTCGAGACACCTGATGACCTGTAGATGAT   | [2679] |
| NycterisG    | GTCCTGCTTCTCAGGTTTGTTCGAGACACCGATGACCTATTAGATGAC   | [2583] |
| Antrozous    | ACGCTGTTTCTCAGGTTTGTTCGAGACACCGATGACTTGTAACTGAT    | [2628] |
| Rhogeessa    | GTCCTGTTTCTCAGGTTTGTTCGCGACACCGGATGAC????????????  | [2637] |
| Noctilio     | GTCCTGCTTCTCAGGTTTGTTCGAGACACCGATGACCTGTAAATGAT    | [2634] |
| Natalus      | GTCCTGCTTCTCAGGTTTGTTCGAGACACCGATGATCTATTAAATGAT   | [2628] |
| Rhinolophus  | GTCA-----GGTTTGTTCGAGACACCGAGGACCTGTAAACGAG        | [2667] |
| Rousettus    | GTAATGCTTCTCAGGTTTGTTCGAGACACCGGATGACATGTAAATGAT   | [2637] |
| NycterisT    | ?????????????????????????????????????????????????? | [2598] |
| Nyctimene    | GTAATGCTTTTCAAGTTTGTTCGAGACACCGGATTACCTGTAAATGAT   | [2652] |
| Mole         | GTCATGCTTCTCAGGTTTGTTCGAGACGCTGAGGACCTGTAAATGA-    | [2672] |
| Horse        | GTTGTGCTTCTCAGGTTTGTTCGAGACACCTGATGACCTGTAAATGAT   | [2658] |
| Desmodus     | GTCCTGCTTCTCGGGTTTGTTCGAGACCCAGATGACCTGTAAATGAT    | [2607] |
| Rhinopoma    | GTCATGCTTCTCAGGTTTGTTCGAGACGCGGATGACCTGTAAATGAT    | [2676] |
| Emballonura  | GTCCTGCTTCTCAGGTTTGTTCGAGACACCGGATGACCTGTAGATAAT   | [2619] |
| Cow          | GTCATGCTTCTCAGGTTTGTTCGAGACACCTGACAACCTGTAAATGAT   | [2655] |
| Pangolin     | GTCATGCTTCTCAGGTTTGTTCGAGACACCTGAGGACATATTAAATGGT  | [2658] |
| Whale        | GCCATGCTTCTCAGGTTTGTTCGAGACATCTGACGAGTTTTTAAATGAT  | [2661] |

[ 2710 2720 2730 2740 2750 ]  
[ . . . . . ]

|              |                                                       |        |
|--------------|-------------------------------------------------------|--------|
| Tonatia      | GACAAGGTAAAGGAGGATAACA---GCTTTGCTGAAAGCGGCATGAAGGA    | [2645] |
| Myotis       | GATGAAATAAAGGAGAAATAGCG---GCTTTGATGAAAGTGGCATTAA?GA   | [2681] |
| Tadarida     | GACAAAATAAAGGAGAAATAGCA---GCTTTGCTGAAAGTGGCATTAAAGGA  | [2669] |
| Taphozous    | GACAAAATAAAGGAGAAATAGCA---GCTTTGCTGAAAGTGGCATTAAAGGA  | [2678] |
| Megaderma    | TATGAAATAAAGGAAAATGTTA---GCTTTAAGGAAAGATCTGCTGTTTT    | [2699] |
| Cynopterus   | GACAAAATAAAGGACAATATCA---GCTTTGATGAAAGTGGCATTACAGGA   | [2696] |
| Pteropus     | GACAAAATAAAGGAGAAATATCG---GCTTTGATGAAAGTGGCATTAAAGGA  | [2681] |
| Hipposideros | AACGAAAATAAAGGAAAATGACA---GCTTTGCTGAAAGTGCATTAAAGGA   | [2720] |
| Cat          | GATGAAATAAAGGAAAATATCA---GCTTTGCTGAAAGTG---CTAAGGA    | [2723] |
| Human        | GGTGAAAATAAAGGAAAGATACTA---GTTTTGCTGAAAATGACATTAAAGGA | [2717] |
| Mouse        | GTTGAAATACAGGGACATACTA---GCTTTGCTGAAAGTGACATAATGGA    | [2615] |
| Flyinglemur  | GATGAGATAAAGGAAAACACCA---GCTTTGCTGAAAGTGCAGTAAGGA     | [2726] |
| NycterisG    | AACAAAATAAAGGAGAAATAGCA---GCTTTGCTGAAAGTGGCATTATGGA   | [2630] |
| Antrozous    | GATGAAATAAAGGAGACACGCG---GCTTTGATGAAAGTGGCATTAAAGGA   | [2675] |
| Rhogeessa    | ??????????????????????????????????????????????????    | [2687] |
| Noctilio     | GACAAAATAGAGGAGAAATAGCA---GCTTTGTTGAAAGTGGCATTAAAGGA  | [2681] |
| Natalus      | GATGAAATAAAGGAGAAATAGCA---GTTTTGCTGAAAGTGGCATTAAAGA   | [2675] |
| Rhinolophus  | AATGAAATAAAGGAAAATGGCA---GCTTTGCTGAAAGTGACGTGAAGGA    | [2714] |
| Rousettus    | GACAAAATAAAGGAGAAATATTG---GCTTTGATGAAAGTGCATTAAAGGA   | [2684] |
| NycterisT    | ??????????????????????????????????????????????????    | [2648] |
| Nyctimene    | GACAAAATAAAGGAGAAATATCA---GCTTTGATGAAAGTGGCATTAGAGGA  | [2699] |
| Mole         | --CGAAAATAAAGGATAATAACATCAGCTTTGCTGACAGTGGCATTAAAGGA  | [2720] |
| Horse        | GACGAAAATAAAGGAAAATATCA---GCTTTGCTGAAAGTGGCGTTAAAGGA  | [2705] |
| Desmodus     | GACAAGGTAAAGGAGAAACA---GCTTTGCTGAAAGTGGCATTAAAGGA     | [2654] |
| Rhinopoma    | AATGAAATAAAGGAAAATGTCA---GCTTTGCTGAAAGTGCATTAAAGGA    | [2723] |
| Emballonura  | GACAAAATAAAGGAGAAATAGCA---GCTTTGCTGAAAGTGCATTAAAGGA   | [2666] |
| Cow          | GATGAAATAAAGGAAAATAGCC---ACTTTGCTGAAAGTGCATTAAAGGA    | [2702] |
| Pangolin     | GATGAAATAAAGGAAAATATCG---GCTTTGCTGAAAGTGGTATTAAAGGA   | [2705] |
| Whale        | GACAAAATAAAGGAAAATAGCA---ACTTTGCTGAAAGTGCATTAAAGGA    | [2708] |

|              |                                                       |      |      |      |       |        |
|--------------|-------------------------------------------------------|------|------|------|-------|--------|
| [            | 2760                                                  | 2770 | 2780 | 2790 | 2800] |        |
| [            | .                                                     | .    | .    | .    | .     | ]      |
| Tonatia      | CAGATCTGCTGTTTTAGCAAAAAGCGTCTGAAA---GAATTCAGAAGGA     |      |      |      |       | [2692] |
| Myotis       | AAGATCTGCTGTTTTAGCAAAAGATGTTTCAGAAAGAGAATTCAGAGGGA    |      |      |      |       | [2731] |
| Tadarida     | AAGATCTGCTATTTTTAGCAAAAAGTGTCAAGAAAGAAAATTCAGAAGGA    |      |      |      |       | [2719] |
| Taphozous    | AAGATCTGCTATTTTTAGCAAAAAGTGCCAGAGAA---GAACTCAGCAGGA   |      |      |      |       | [2725] |
| Megaderma    | TAGCAAAAGT-----GTCCAAAAGAGAATTCAGTAGAA                |      |      |      |       | [2734] |
| Cynopterus   | AAGATCTGCTGTTTTAGCAAAAATGTCCAGAAAGGAGAATTCAGAAGGA     |      |      |      |       | [2746] |
| Pteropus     | AAGATCTGCTGTTTTAGCAAAAAGTGTCCAGAAAGGAGAATTCAAAAGGA    |      |      |      |       | [2731] |
| Hipposideros | AAGATCTGCTGTTTTAGCAAAAAGTGTCCAGAAAGGAGAATTCAGAAGGA    |      |      |      |       | [2770] |
| Cat          | AAGATCTGCTGTTTTGGCAAGAGTGTCCAGAAAGGAGAATTCAGAAGGA     |      |      |      |       | [2773] |
| Human        | AAGTTCTGCTGTTTTAGCAAAAAGCGTCCAGAAAGGAGAGCTTAGCAGGA    |      |      |      |       | [2767] |
| Mouse        | GAGATCTGCTGTCTTTAACGGAAGCATCTGAGAAGGGAGTCCAGTAGGA     |      |      |      |       | [2665] |
| Flyinglemur  | AAGATCTGCTGTTTTAGCAAAAAGTGTCCAGAGAGGAGAGTTAAGCAGGA    |      |      |      |       | [2776] |
| NycterisG    | AAGATCTGCTGTTTTGGGAAAAGTGTCCAGAAA---GAATTTAGAAGGA     |      |      |      |       | [2677] |
| Antrozous    | AAGATCTGCTGTTTTAGCAAAAGGTGTCCAGAAA---GAATTCAGAAGGA    |      |      |      |       | [2722] |
| Rhogeessa    | ????????????????????????????????????????????????????  |      |      |      |       | [2737] |
| Noctilio     | CAGATCTGCCGTTTTAGCAAAAAGTGCCAAGAGA---GAGTTAGAAGGA     |      |      |      |       | [2728] |
| Natalus      | AAGATCTGCTGTTTTAGCAAAAAGTGTCCAGAAAGAGAATTCAGAAGGA     |      |      |      |       | [2725] |
| Rhinolophus  | AAGATCTGCTGTTTTAGCAAAAAGTGTCCAGAAA---GAATTCAGAAGGA    |      |      |      |       | [2761] |
| Rousettus    | AAGATCTGCTGTTTTAGCAAAAAGTGTCCAGAAAGGAGAATTCAGAAGGA    |      |      |      |       | [2734] |
| NycterisT    | ????????????????????????????????????????????????????  |      |      |      |       | [2698] |
| Nyctimene    | AAGATCTGCTGTTTTAGCAAAAAGTGTCCAGAGAGAAGAATTCAGAAGGA    |      |      |      |       | [2749] |
| Mole         | AAGATCTGCTGTTTTAGCAAAAAGTGTCCAGAAAGGAGAATTC---AGGA    |      |      |      |       | [2767] |
| Horse        | AAGATCTGCCGTTTTAGCAAAAAGCGTCCAGAAAGGAGAAGTTTTCAGAAGGA |      |      |      |       | [2755] |
| Desmodus     | AAGATCTGCTGTTTTAGCAAAAAGTGTCCCGAAA---GAACTCAGAAGGA    |      |      |      |       | [2701] |
| Rhinopoma    | AAGATCTGCTATTTTTAGCAAAAAGTGTCCAGAAAAGAGAATTCAGAAGGA   |      |      |      |       | [2773] |
| Emballonura  | AAGGTCTGCTATTTTTAGCACAAAGTGCCAGAAA---GAACTCAGAAGGA    |      |      |      |       | [2713] |
| Cow          | AAGATCTGCTGTTTTAGTGAAGAGTGTCCAAAAGGAGAATTCAGAAGGA     |      |      |      |       | [2752] |
| Pangolin     | AAGATCTGCTGTTTCTAGCAAAAAGTGTCCAGAAAGGAGAATTCAGAAGGA   |      |      |      |       | [2755] |
| Whale        | AAGATCT---GTTTTAGCAAAAAGTGTCCAAAAGGAGAATTCAGAAGGA     |      |      |      |       | [2755] |

|              |                                                      |      |      |      |       |        |
|--------------|------------------------------------------------------|------|------|------|-------|--------|
| [            | 2810                                                 | 2820 | 2830 | 2840 | 2850] |        |
| [            | .                                                    | .    | .    | .    | .     | ]      |
| Tonatia      | GCCCCAGTCCCTTAGCCAC---ACA?CTTTGGCTCGGGGTACCCCAAGA    |      |      |      |       | [2739] |
| Myotis       | GCCTAGCCCTTAGCCAT---ACATATTTGACTCGGAGTTGCCAAAGA      |      |      |      |       | [2778] |
| Tadarida     | GCCTAGCCCTTAGCCAT---ACACATTTGACTCATACTCGCCAAAGA      |      |      |      |       | [2766] |
| Taphozous    | GCCTAGCCCTTAACCCAT---ACACATTTGGCTCAGGGTCAGCAGAGA     |      |      |      |       | [2772] |
| Megaderma    | GCCTAGCCCTTAATCCAT---ACATGTTTAGTCTCAGGGTCACCCAAAGA   |      |      |      |       | [2781] |
| Cynopterus   | GCCTAGTCCCTTAGCCAT---GCAAGTTTGTCTCAAGGTCGCCAAAGA     |      |      |      |       | [2793] |
| Pteropus     | GCCTAGTCCCTTAGCCAT---ACAAGTTTGTCTCAAGGTCGCCAAAGA     |      |      |      |       | [2778] |
| Hipposideros | GCCTAGCCCTTAGCTCAC---ACACGTTTGGCTCAGGGTCACCAAAGA     |      |      |      |       | [2817] |
| Cat          | GCCTAGCCCTTAGCCAT---ACACATCTGGCTCAGGGTCACCAAAGA      |      |      |      |       | [2820] |
| Human        | GTCCTAGCCCTTACCCAT---ACACATTTGGCTCAGGGTTACCCAAAGA    |      |      |      |       | [2814] |
| Mouse        | GCCTAGTCCCTTAACCCAT---GCATCGAAGTCTCAGAGTCTCCACAGA    |      |      |      |       | [2712] |
| Flyinglemur  | GCCTAGCCCTTTGCCCCA---ACATGTTTGGCTCAGGGTCACCAAAGA     |      |      |      |       | [2823] |
| NycterisG    | GCCTAGCCCTTACCCAT---ACCCATTCGGTTCAGGT??????????      |      |      |      |       | [2724] |
| Antrozous    | GCCTAGCCCTTAGCCAT---ACATATTTGACTCGGGT??????????      |      |      |      |       | [2769] |
| Rhogeessa    | ???????????????????????????????????????????????????? |      |      |      |       | [2787] |
| Noctilio     | GCCTAGCCCTTAATCCAT---ACACATTTGGCTCAGGGTTGCCAAAGA     |      |      |      |       | [2775] |
| Natalus      | GCCTAGCCCTTAGCCAT---ACACATTTGGCTCAGGGTCGCCAAAGA      |      |      |      |       | [2772] |
| Rhinolophus  | GCTTAGCCCTTAGTTCAT---ACACGTTTGGCTCAGGGTCACCAAAGA     |      |      |      |       | [2808] |
| Rousettus    | GCCTAGTCCCTTAGCCAT---ACAAGTTTGTCCAGGGTCGCCAAAGA      |      |      |      |       | [2781] |
| NycterisT    | ???????????????????????????????????????????????????? |      |      |      |       | [2748] |
| Nyctimene    | GCCTAGTCCCTTAGCCAT---ACAAGTT??????????????????????   |      |      |      |       | [2796] |
| Mole         | GCCTAGCCTTTTAGCCAT---ACATGTTTGGCTCAGGACCACGAAAGT     |      |      |      |       | [2814] |
| Horse        | GTCCTAGCCCTTAGGCCAT---ACGTTTGGCTCAGGGTCACCAAAGA      |      |      |      |       | [2802] |
| Desmodus     | GCCTAGTCCCTTAGTCCAC---ACACGTTTGGCCAGGGTCACCAAAGA     |      |      |      |       | [2748] |
| Rhinopoma    | GCCTAGCCCTTAGCCAT---CCATGTTTGGCTCAGGGTCACCAAAGA      |      |      |      |       | [2820] |
| Emballonura  | GCCTAGCCCTTAGCCAT---ATACATTTGGTTCAGGGT??????????     |      |      |      |       | [2760] |
| Cow          | GCCTAGCCCTTACCCAT---ACACATTTGGCTCAGGGTCACCAAAGA      |      |      |      |       | [2799] |
| Pangolin     | GCCTAGCCCTTAGTCCAT---ATGAGTTTGTCTCAGAGTACCAAAGA      |      |      |      |       | [2802] |
| Whale        | GCCTAGCCCTTAGCCATCATACATGTTTGGCTCAGGGTCACCAAAGA      |      |      |      |       | [2805] |

|           |                                                     |      |      |      |       |        |
|-----------|-----------------------------------------------------|------|------|------|-------|--------|
| [         | 2860                                                | 2870 | 2880 | 2890 | 2900] |        |
| [         | .                                                   | .    | .    | .    | .     | ]      |
| Tonatia   | AGGGCCAGGAAACTCGAGTCCCTCAGAAGAGGACAAGACCTCGATGACTAC |      |      |      |       | [2789] |
| Myotis    | AGGGCCAGGAAATAGAGTCCCTCAGAAGAGGACAAGACCTGGATGACTAC  |      |      |      |       | [2828] |
| Tadarida  | GGGGCCAGGAAATAGAGTCCCTCAG????????CAAGACCTTGAGGACTAT |      |      |      |       | [2816] |
| Taphozous | AGGGCCGGGAAATAGAGCC????????????CAAGACCTTGATGACTAT   |      |      |      |       | [2822] |



|             |                                                      |        |
|-------------|------------------------------------------------------|--------|
| Flyinglemur | AGATGTGAGTGAGAAGCATGGCAGCGGGCCAGCGGTTCCAGAAAAGGCGG   | [2973] |
| NycterisG   | AGACGTGAGTGAGAAGCACGGGAGCGGGCCCCAGTGCCAGAAAAGGCTG    | [2874] |
| Antrozous   | AGATGTGAGTGAGAAGCATGGGAGTGGGCCAG?GGTCCCAGAAAAGGCGG   | [2919] |
| Rhogeessa   | AGATGTGAGTGAGAAGCATGGGAGTGGGCCAGCGGTTCCCGAAAAGGCGG   | [2937] |
| Noctilio    | AGATGTGAGTGAGAAGCACGGGAGTGGGCCAGCCGTTCCAGAGAAGGCGG   | [2925] |
| Natalus     | GGATGTGAGTGAGAAGCATGGGAGTGGGCCAGCAGTTCCGGAAAAGGCGG   | [2922] |
| Rhinolophus | AGATGTGAGTGAGAAGCATGGGAGTGGGCCAGCGCTTCCAGAAAAGGCGG   | [2958] |
| Rousettus   | AGATGTGAGTGAGAAGCACGGGAGTGGGCCAGCAGTTCCGGAAAAGGCGG   | [2931] |
| NycterisT   | ???????????????????????????????????????????????????? | [2898] |
| Nyctimene   | AGATGTGAGTGAGAAGCACGGCAGTGGGCCAGCAGTTCCGGAAAAGGCGG   | [2946] |
| Mole        | AGATGTGAGCGAGAAGCACGGGAGTGGGCCCGCCGTTCCAGAAAAGGCTG   | [2958] |
| Horse       | AGACGTGAGTGAGAAGCACGGCAGTGGGCCAGCCGTTCCGGAAAAGGCGG   | [2952] |
| Desmodus    | AGATGTGAGTGAGAAGCATGGGAGCGGGCCAGCAGTTCCAGAAAAGGCGG   | [2898] |
| Rhinopoma   | AGATGTGAGTGAGAAGCACGGGAGTGGGCCAGTGGCCAGAAAAGGCGG     | [2970] |
| Emballonura | ???????????????????????????????????????????????????? | [2910] |
| Cow         | AGACGTGAGCGAGAAGCACGGCAGCGGACCGGAGTTCCAGAAAAGGGGG    | [2946] |
| Pangolin    | CGATGTGAGTGAGAAGCACGGGAGTGGACCAGCCGTTCCGGAAAAGGCGG   | [2952] |
| Whale       | AGATGTGGGCGAGAAGCACGGCAGTGGGCCAGCAGTTCCGGAAAAGGCGG   | [2946] |

[ 3010 3020 3030 3040 3050 ]  
[ . . . . . ]

|              |                                                      |        |
|--------------|------------------------------------------------------|--------|
| Tonatia      | TTCGGTTCTCATTACAGTCATGAAGATTACTATAGCACATGGCTCACAG    | [2939] |
| Myotis       | TTCGGTTCTCCTTCACAGTCATGAGGATTACCGTAGCCACGGCTCACAG    | [2978] |
| Tadarida     | TTCGGTTCTCATTACAGTCATGAAAATCACCATAGCACACGGCTCACAG    | [2966] |
| Taphozous    | TTCGGTTCTCATTACAGTCATGAAGATTACCATAGCACATGGCTCGCAG    | [2972] |
| Megaderma    | TTCGGTTTTCATTACAGTTCATGAGCATCACTGTGCGCACACGGCTCACAG  | [2981] |
| Cynopterus   | TTCGATTTTCGTTTCACAGTCATGAAAATCACTATAGCACATGGCTCCCAG  | [2993] |
| Pteropus     | TTCGATTTTTCGTTTCACAGTCATGAAAATCACTATAGAACATGGCTCACAG | [2978] |
| Hipposideros | TTCGGTTTTCATTCACTGTGATGAAAATCACTATAGCACAAAGGCTCACAG  | [3017] |
| Cat          | TTCGTTTTTCGTTTCACAGTCATGAAGATTACCGTAGCGCACGGCTCAGAA  | [3020] |
| Human        | TTCGTTTTTTCATTACAAATCATGAAAATTAATATTGCCACAGCTCTCAG   | [3014] |
| Mouse        | TTCGTTTTCTTTCACAGTCATGAGAATTACGATAGAGCATGGTTTCACAG   | [2912] |
| Flyinglemur  | TTCGTTTTTTCATTACTGTGATGAAAATCACTATAGCACATGGCTCACAA   | [3023] |
| NycterisG    | TTCGGTTCTCAGTTTCACAGTCATGAAAATTTCCATAGCACAGCTCACAG   | [2924] |
| Antrozous    | TTCGGTTCTCATTACAGTCATGAAGATCACCATAGCCATGGCTCACAG     | [2969] |
| Rhogeessa    | TTCGGTTCTCATTACAGTCATGAAGATCACCATAGCCATGGCTCCCAG     | [2987] |
| Noctilio     | TTCGGTTCTCCTTCACAGTCATGAAAGTTTCGATAGCACACGGCTCCCAG   | [2975] |
| Natalus      | TTCGGTTCTCATTACAGTCATGAAAATTAATATAGCACATGGCTCACAG    | [2972] |
| Rhinolophus  | TTCGGTTTTCATTACAGTCATGAAAATTAATATAGCACATGGCTCACAG    | [3008] |
| Rousettus    | TTCGATTTTCGTTTCACAGTCATGAAAATCAGTATAGCACATGGCTCACAG  | [2981] |
| NycterisT    | ???????????????????????????????????????????????????? | [2948] |
| Nyctimene    | TTCGATTTTCGTTTCACAGTCATGAAAATCACTATAGAACGTTGGCTCACAG | [2996] |
| Mole         | TTCGATTTTTCATTACCCGTCATGAAAATCTCTATCGAGCATGGCTCACAG  | [3008] |
| Horse        | TTCGGTTTTCATTACAAATCATGAAAATTAATATAGCACATGGCTCACAG   | [3002] |
| Desmodus     | TTCGGTTCTCATTACAGTCATGAAAATCACTGTAGCACACGGCTCACAG    | [2948] |
| Rhinopoma    | TTCGGTTTTCATTCACTGTGATGAAAATTTCTATAGCACACGGCTCGCAG   | [3020] |
| Emballonura  | ???????????????????????????????????????????????????? | [2960] |
| Cow          | TTCGGTTTCTTTCACGGTCATGAAAATCAGCATTGCTCACGGGTCACAG    | [2996] |
| Pangolin     | TTCGGTTTTCATTACAGTCATGAAAATTAATATAGCCATGGCTCACAG     | [3002] |
| Whale        | TTCGGTTTTCCTTCACAGTCATGAAAATCACCATCGCTCACGGGTCACAG   | [2996] |

[ 3060 3070 3080 3090 3100 ]  
[ . . . . . ]

|              |                                                     |        |
|--------------|-----------------------------------------------------|--------|
| Tonatia      | AGTGTGAAGGTGTTTGAGGAAGCCAAACCTAACTCTGAACCTGTTGCAA   | [2989] |
| Myotis       | GATGTGAAGGTGTTTGAGGAAGCCAAAGCCTAACTCTGAACCTGTTGCAA  | [3028] |
| Tadarida     | GATGTGAAGGTGTTTGAGGAGGCCAAACCTAACTCTGAGCTGTTGCAA    | [3016] |
| Taphozous    | AATGTGAAGGTGTTTGAGGAAGCCAAACCTAACTCTGAACCTGTTGCAA   | [3022] |
| Megaderma    | AACGTGAAGGTGTTTGAGGAAGCCAAAGCCTAACTCTGAACCTGTTGCAA  | [3031] |
| Cynopterus   | AATGTGAAGGTGTTTGAGGAAGCCAAACCTAACTCTGAACCTGTTGCAA   | [3043] |
| Pteropus     | AATGTGAAGGTGTTTGAGGAAGCCAAACCTAACTCTGAATGTTGCAA     | [3028] |
| Hipposideros | AACGTGAAGGTGTTTGAGGAAGCCAAACCTAACTCGGAATTGTTGCAA    | [3067] |
| Cat          | AACGTGAAGGTATTTGAGGAGGTCAAACCTAACTCTGAACCTGTTGCAA   | [3070] |
| Human        | AATGTGAAGGTATTTGAAGAAGCCAAACCTAACTCTGAACCTGTTGCAA   | [3064] |
| Mouse        | AACGTGAAGGTGTTTGAGGAAGCCAAAGCCTAACTCTGAACCTGTTGCAA  | [2962] |
| Flyinglemur  | AATGTGAAGGTGTTTGAGGAAGCCAAAGCCTAACTCTGAACCTGTTGCAA  | [3073] |
| NycterisG    | AATGTGAAGGTGTTTGAGGAAGCCAAAGCCTAACTCTGAACCTGTTGCAA  | [2974] |
| Antrozous    | GATGTGAAGGTGTTTGAGGAAGCCAAAGCCTAACTCTGAACCTGTTGCAA  | [3019] |
| Rhogeessa    | GATGTGAAGGTGTTTGAGGAAGCCAAAGCCTAACTCTGAACCTGTTGCAA  | [3037] |
| Noctilio     | AATGTGAAGGTGTTTGAGGAAGCCAAACCTAACTCTGAACCTGTTGCAA   | [3025] |
| Natalus      | AATGTGAAGGTGTTTGAGGAAGCCAAACCTAACTCTGAACCTGTTGCAA   | [3022] |
| Rhinolophus  | AATGTGAAGGTGTTTGAGGAAGCCAAACCTAACTCTGAACCTATGTTGCAA | [3058] |

|             |                                                     |          |
|-------------|-----------------------------------------------------|----------|
| Rousettus   | AATGTGACGGTGTTCGAGGAAGCCAAACCAACTCTGAACTGTGTTGCAA   | [ 3031 ] |
| NycterisT   | ????????????????????????????????????????????????    | [ 2998 ] |
| Nyctimene   | AATGTGAAGGTGTTCGAGGAAGCCAAACCAACTCTGAACTGTGTTGCAA   | [ 3046 ] |
| Mole        | AATGTGAAGGTGTTTGAAGAAGCCAAACCAATTCGAGCTGTGTTGCAA    | [ 3058 ] |
| Horse       | AATGTGAAGGTGTTTGAAGAAGCCAAACCTAACTCTGAGCTGTGTTGCAA  | [ 3052 ] |
| Desmodus    | AGTGTGAAGGTGTTTGAAGAAGCCAAACCTAACTCTGAACTGTGTTGCAA  | [ 2998 ] |
| Rhinopoma   | AATGTGAAGGTGTTCGAGGAAGCCAAACCAACTCTGAACTGTGTTGCAA   | [ 3070 ] |
| Emballonura | ?????AAGGTGTTTGAAGAAGCCAAACCTAACTCCGAACTGTGTTGCAA   | [ 3010 ] |
| Cow         | AACGTGAAGGTGTTCGAGGAAGCCAAAGCCTAACTCCGAGCTCTGCTGCAA | [ 3046 ] |
| Pangolin    | AACGTGAAGGTGTTTGAAGAAGCCAAACCTAACTCTGAACTGTGTTGCAA  | [ 3052 ] |
| Whale       | AATGTGAAGGTGTTTGAAGAAGCCAAAGCCTAACTCTGAACTGTGTTGCAA | [ 3046 ] |

[ 3110 3120 3130 3140 3150 ]  
[ . . . . . ]

|              |                                                     |          |
|--------------|-----------------------------------------------------|----------|
| Tonatia      | GCCCTGTGCCTTATGCTGGCAGATGAGTCCGACCATGAGACCCCTCACAG  | [ 3039 ] |
| Myotis       | GCCCTTGTGCCTTATGCTGGCAGATGAGTCTGACCACGAGACCCCTGACGG | [ 3078 ] |
| Tadarida     | GCCCTTGTGCCTTATGCTGGCAGATGAGTCTGACCACGAGACCCCTGACGG | [ 3066 ] |
| Taphozous    | GCCCTTGTGCCTTATGCTGGCAGATGAGTCCGACCATGAGACCCCTGACAG | [ 3072 ] |
| Megaderma    | GCCCTTGTGCCTTATGCTGGCAGATGAGTCCGACCACGAGACCCCTGACAG | [ 3081 ] |
| Cynopterus   | GCCCTTGTGCCTTATGCTGGCAGATGAGTCTGACCATGAGACCCCTGACAG | [ 3093 ] |
| Pteropus     | GCCCTTGTGCCTTATGCTGGCAGATGAGTCCGACCACGAGACCCCTGACAG | [ 3078 ] |
| Hipposideros | GCCCTTGTGCCTTATGCTGGCAGATGAGTCCGACCATGAGACGCTGACAG  | [ 3117 ] |
| Cat          | GCCCTTGTGCCTTATGCTGGCAGACGAGTCTGACCACGAGACACTGACGG  | [ 3120 ] |
| Human        | GCCATTGTGCCTTATGCTGGCAGATGAGTCTGACCACGAGACGCTGACTG  | [ 3114 ] |
| Mouse        | GCCGTTGTGCTTATGCTGGCAGATGAGTCTGACCATGAGACCCCTACTG   | [ 3012 ] |
| Flyinglemur  | GCCACTGTGCCTTATGCTGGCAGATGAGTCTGACCACGAGACCCCTGACTG | [ 3123 ] |
| NycterisG    | GCCCTTGTGCCTTATGCTGGCAGATGAGTCCGACCATGAGACCCCTGACAG | [ 3024 ] |
| Antrozous    | GCCCTTGTGCCTTATGCTGGCAGATGAGTCTGACCACGAGACCCCTGACAG | [ 3069 ] |
| Rhogeessa    | GCCCTTGTGCCTTATGCTGGCAGATGAGTCTGACCACGAGACCCCTAACGG | [ 3087 ] |
| Noctilio     | GCCCTTGTGCCTTATGCTGGCAGATGAGTCTGACCACGAGACCCCTCACTG | [ 3075 ] |
| Natalus      | GCCCTTGTGCCTTATGCTGGCAGATGAGTCCGACCACGAGACCCCTGACGG | [ 3072 ] |
| Rhinolophus  | GC????????????????????????????????????????????????  | [ 3108 ] |
| Rousettus    | GCCCTTGTGCCTTATGCTGGCAGATGAGTCCGACCACGAGACCCCTGACAG | [ 3081 ] |
| NycterisT    | ????????????????????????????????????????????????    | [ 3048 ] |
| Nyctimene    | GCCCTTGTGCCTTATGCTGGCAGATGAGTCCGACCACGAGACCCCTGACGG | [ 3096 ] |
| Mole         | GCCCTTGTGCCTTATGCTGGCAGACGAGTCTGACCATGAGACCCCTGACTG | [ 3108 ] |
| Horse        | GCCCTTGTGCCTTATGCTGGCAGATGAATCTGACCACGAGACTCTGACGG  | [ 3102 ] |
| Desmodus     | GCCCTTGTGCCTTATGCTGGCAGATGAGTCCGACCACGAGACCCCTCACAG | [ 3048 ] |
| Rhinopoma    | GCCCTTGTGCCTGATGCTGGCAGATGAGTCCGACCACGAGACCCCTGACGG | [ 3120 ] |
| Emballonura  | ACCTTATGCCTTATGCTGGCAGACGAGTCCGACCATGAGACCCCTGACAG  | [ 3060 ] |
| Cow          | GCCGCTGTGCCTTATGCTAGCCGATGAGTCTGACCACGAGACCCCTGACGG | [ 3096 ] |
| Pangolin     | GCCCTTGTGCCTTATGCTGGCCGATGAGTCTGACCACGAGACCCCTGACGG | [ 3102 ] |
| Whale        | GCCCTTGTGCCTTATGCTGGCAGATGAGTCTGACCACGAGACCCCTGACGG | [ 3096 ] |

[ 3160 3170 3180 3190 3200 ]  
[ . . . . . ]

|              |                                                           |          |
|--------------|-----------------------------------------------------------|----------|
| Tonatia      | CCATCCTAAGCCCTCTCATTGCCGAGAGGGAGGCCATGAAGAACAGCGAA        | [ 3089 ] |
| Myotis       | CCATCCTGAGCCCTCTCATTGCCGAGAGGGAGGCCATGAAGAGCAGCGAA        | [ 3128 ] |
| Tadarida     | CCATCCTGAGCCCTCTGATTGCCGAGAGGGAGGCCATGAAGAACAGCCAG        | [ 3116 ] |
| Taphozous    | CCATCCTAAGCCCTCTCATTGCCGAGAGGGAGGCCATGAAGTACAGCGAA        | [ 3122 ] |
| Megaderma    | CCATTTTGAAGCCCTCTCATTGCCGAGAGGGAGGCCATGAAGGGCAGCGAA       | [ 3131 ] |
| Cynopterus   | CCATCCTGAGCCCTCTCATTGCCGAGAGGGAGGCCATGAAGAGCAGCGAA        | [ 3143 ] |
| Pteropus     | CCATCCTGAGCCCTCTCATTGCCGAGAGGGAGGCCATGAAGAGCAGCGAA        | [ 3128 ] |
| Hipposideros | CCATCCTGAGCCCTCTTATTGCTGAGAGGGAGGCCATGAAGAACAGCGAA        | [ 3167 ] |
| Cat          | CCATCTTGAAGCCCTCTCATTGCCGAGAGGGAGGCCATGAAGGCCAGCAAC       | [ 3170 ] |
| Human        | CCATCCTGAGTCTCTCATTGCTGAGAGGGAGGCCATGAAGAGCAGTGAA         | [ 3164 ] |
| Mouse        | CTATTCTAAGCCCTCTCATTGCCGAGAGGGAGGCCATGAAGAGCAGTGAA        | [ 3062 ] |
| Flyinglemur  | CCATCCTGAGCCCTCTCATTGCCGAGAGGGAGGCCATGAAGAGCAGTGAA        | [ 3173 ] |
| NycterisG    | CCATCCTGAGCCCTCTAATCGCTGAGAGGGAGGCCATGAAGAGCAGTGAA        | [ 3074 ] |
| Antrozous    | CCATCCTGAGCCCTCTCATTGCCGAGAGGGAGGCCATGAAGAGCAGTGAA        | [ 3119 ] |
| Rhogeessa    | CCATCCTGAGCCCTCTCATTGCGAGAGGGAGGCCATGAAGAGCAGTGAG         | [ 3137 ] |
| Noctilio     | CCATCCTGAGCCCTCTCATAGCGGAGAGAGGCCATGAAGAACAGCGAG          | [ 3125 ] |
| Natalus      | CCATCCTGAGCCCTCTCATTGCCGAGAGGGAGGCCATGAAGGGCAGCGAG        | [ 3122 ] |
| Rhinolophus  | ??TCTAAGCCCTCTTATTGCTGAAAGGGAGGCCATGAAGAGCAGTGAA          | [ 3158 ] |
| Rousettus    | CCATCCTGAGCCCTCTCATTGCCGAGAGGGAGGCCATGAAGAGCAGCGAA        | [ 3131 ] |
| NycterisT    | ????????????????????????????CCGAGAGGGAGGCCATGAAGAGCAGTGAG | [ 3098 ] |
| Nyctimene    | CCATCCTGAGCCCTCTCATTGCCGAGAGGGAGGCCATGAAGAGCAGTGAA        | [ 3146 ] |
| Mole         | CCATCCTGAGCCCTCTATTACCGAGAGGGAGGCCATGAAGAGCAGCCAA         | [ 3158 ] |
| Horse        | CCATCCTGAGCCCTCTGATTGCTGAGAGGGAGGCCATGAAGAGCAGCGAA        | [ 3152 ] |
| Desmodus     | CCATCCTAAGCCCTCTCATTGCCGAGAGGGAGGCCATGAAGAACAGCGAA        | [ 3098 ] |
| Rhinopoma    | CCATCCTGAGCCCTCTCATTGCTGAGAGGGAGGCCATGAAGAGCAGCGAA        | [ 3170 ] |

|             |                                                    |        |
|-------------|----------------------------------------------------|--------|
| Emballonura | CCATCCTGAGCCCTCTCATTGTTAAGAGGGAGGCCATGAAGAGCAGTGAA | [3110] |
| Cow         | CCATCCTGAGCCCTCTGATTGCGGAGAGGGAGGCCATGAAGAGCAGCGAA | [3146] |
| Pangolin    | CCATCCTGAGCCCTCTCATTGCGGAGAGGGAGGCCATGAAGAGCAGCGAA | [3152] |
| Whale       | CCATCCTGAGCCCTCTCATTGCGGAGAGGGAGGCCATGAAGAGCAGCAAA | [3146] |

[ 3210 3220 3230 3240 3250 ]  
[ . . . . . ]

|              |                                                     |        |
|--------------|-----------------------------------------------------|--------|
| Tonatia      | TTGATGCTTGAATGGGAGGCATCCTCCGGACTTTCAAGTTCATCTTCAG   | [3139] |
| Myotis       | TTAATGCTGGAGATGGGAGGCATCCTCCGGACTTTCAAGTTCATCTTCAG  | [3178] |
| Tadarida     | TTAATGCTGGAGATGGGAGGCATCCTCCGGCTTTCAAGTTCATCTTCAG   | [3166] |
| Taphozous    | TTAATGCTGGAGATGGGAGGCATCCTCCGGACTTTCAAGTTCATCTTCAG  | [3172] |
| Megaderma    | TTGATGCTGGAGATGGGAGGCATCCTCCGGACTTTCAAGTTCATCTTTAG  | [3181] |
| Cynopterus   | TTAATGCTCGAGATGGGAGGCATCCTCGCTACTTTCAAGTTCATCTTTAG  | [3193] |
| Pteropus     | TTAATGCTGGAGATGGGAGGCATCCTCCGGACTTTCAAGTTCATCTTTAG  | [3178] |
| Hipposideros | TTAATGCTGGAGATGGGAGGCATCCTCCGGACTTTCAAGTTCATCTTTAG  | [3217] |
| Cat          | TTAGTGTGGAGATTGGAAGCATCCTCCGGACTTTCAAGTTCATCTTCAG   | [3220] |
| Human        | TTAATGCTGGAGATGGGAGGCATCCTCCGGACTTTCAAGTTCATCTTCAG  | [3214] |
| Mouse        | TTAACGCTGGAGATGGGAGGCATCCCCAGGACTTTTAAATTCATCTTCAG  | [3112] |
| Flyinglemur  | TTAATGCTGAAATGGGAGG?????????ACTTTCAAGTTCATCTTCAG    | [3223] |
| NycterisG    | TTACTGCTCGAGATGGGAGGCATCCTCCGGACTTTCAAGTTCATCTTCAG  | [3124] |
| Antrozous    | TTGATGCTGGA?ATGGGAGG?ATCCTCCGGACTTTCAAGTTCATCTTCAG  | [3169] |
| Rhogeessa    | TTGATGCTGGAGATGGGAGGCATCCTCCGGACTTTCAAATTCATCTTCAG  | [3187] |
| Noctilio     | TTGATGCTGGAGATGGGAGGCATCCTCCGGACTTTCAAGTTCATCTTCAG  | [3175] |
| Natalus      | TTAATGCTGGAGATGGGAGGCATCCTCCGGACTTTCAAGTTCATCTTCAG  | [3172] |
| Rhinolophus  | TTAATGCTGGAGATGGGAGGCATCCTCCGGACTTTCAAGTTCATCTTTAG  | [3208] |
| Rousettus    | TTAATGCTGGAGATGGGAGGCATCCTCCGGACTTTCAAGTTCATCTTTAG  | [3181] |
| NycterisT    | TTAATGCTCGAGATGGGAGGCATCCTCCGGACTTTCAAGTTCATCTTCAG  | [3148] |
| Nyctimene    | TTAATGCTGGAGATGGGAGGCATCCTCCGGACTTTCAAGTTCATCTTTAG  | [3196] |
| Mole         | TTAATGCTCGAAATGGGAGGCATCCTCCGGACTTTTAAAGTTCATCTTTAG | [3208] |
| Horse        | TTAATGCTGGAGATGGGAGGCATCCTCCGACTTTCCAGTTCATCTTTAG   | [3202] |
| Desmodus     | CTGATGCTGAAATGGGAGGCATCCTCCGGACTTTCAAGTTCATCTTCAG   | [3148] |
| Rhinopoma    | TTAATGCTGGAGATGGGAGGCATCCTCCGGACTTTCAAGTTCATCTTCAG  | [3220] |
| Emballonura  | TTAATGCTGGAGATGGGAGGCATCCTCCGGACTTTCAAGTTCATCTTCAG  | [3160] |
| Cow          | TTAATGCTGGAGATGGGAGGCATCCTCCGGACTTTCAAGTTCATCTTTAG  | [3196] |
| Pangolin     | TTAATGCTCGAGATGGGAGGCATCCTCCGGACTTTCAAGTTCATCTTCAG  | [3202] |
| Whale        | TTAATGCTGGAGATGGGAGGCATCCTCCGGACTTTCAAGTTCATCTTTAG  | [3196] |

[ 3260 3270 3280 3290 3300 ]  
[ . . . . . ]

|              |                                                    |        |
|--------------|----------------------------------------------------|--------|
| Tonatia      | GGGGACTGGGTATGATGAGAAACTGGTCCGTGAAGTGAAGGCCTGGAGG  | [3189] |
| Myotis       | GGGCACCGGATACGATGAGAAACTCGTCCGCGAAGTGAAGGCCTGGAGG  | [3228] |
| Tadarida     | GGGCACCGGTTATGATGAGAAGCTGGTCCGAGAAGTGAAGGCCTCGAGG  | [3216] |
| Taphozous    | GGGCACCGGCTATGATGAGAAACTTGTCCTGGAAGTGAAGGCCTCGAGG  | [3222] |
| Megaderma    | GGGCACCGGATACGATGAGAAACTTGTCGGGAAGTGAAGGCCTGGAGG   | [3231] |
| Cynopterus   | GGGCACCGGATATGATGAGAAACTTGTCGGGAGGTGAAGGCCTCGAGG   | [3243] |
| Pteropus     | GGGCACCGGATATGATGAGAAACTTGTCGGAGAGGTGAAGGCCTCGAGG  | [3228] |
| Hipposideros | GGGCACCGGATATGATGAGAAACTTGTCGGGAAGTGAAGGCCTGGAGG   | [3267] |
| Cat          | GGGCACCTGGGTACGATGAGAAGCTTGTCGGGAAGTGAAGGCCTCGAGG  | [3270] |
| Human        | GGGCACCGGCTATGATGAAAAACTTGTCGGGAAGTGAAGGCCTCGAGG   | [3264] |
| Mouse        | GGGCACCTGGATACGATGAAAAACTTGTCGGGAAGTGAAGGCCTGGAAAG | [3162] |
| Flyinglemur  | GGGCACCGGATATGATGAAAAAGCTCGTTCGGGAAGTGAAGGCCTGGAGG | [3273] |
| NycterisG    | GGGCACCGGCTATGATGAGAAGCTTGTCCTGGAAGTGAAGGTCTCGAGG  | [3174] |
| Antrozous    | GGGCACCGGATATGATGAGAAACTTGTCGGAGAAGTGAAGGCCTGGAGG  | [3219] |
| Rhogeessa    | GGGCACCGGCTATGATGAGAAACTTGTCGGGAAGTGAAGGCCTGGAGG   | [3237] |
| Noctilio     | GGGCACCTGGGTATGACGAGAAACTTGTCCTGAGGTGAAGGCCTGGAGG  | [3225] |
| Natalus      | GGGCACCGGATATGATGAGAAACTTGTCGGGAAGTGAAGGCCTCGAGG   | [3222] |
| Rhinolophus  | GGGCACCGGATACGATGAGAAACTGGTCCGGGAAGTGAAGGCCTGGAGG  | [3258] |
| Rousettus    | GGGCACCGGATATGATGAGAAACTTGTCGGGAAGTGAAGGCCTCGAGG   | [3231] |
| NycterisT    | GGGCAC?GGCTATGATGAGAAACTTGTCCTGGAAGTGAAGGTCTCGAGG  | [3198] |
| Nyctimene    | GGGCACCGGATATGATGAGAAACTTGTCGGGAGGTGAAGGTCTCGAGG   | [3246] |
| Mole         | GGGCACAGGGTATGATGAGAAACTTGTCGGGAAGTGAAGGACTTGAGG   | [3258] |
| Horse        | GGGCACCGGCTATGATGAGAAACTTGTCGGGAAGTGAAGGCCTGGAGG   | [3252] |
| Desmodus     | GGGCACCTGGATATGATGAGAAACTTGTCCTGGAAGTGAAGGCCTCGAGG | [3198] |
| Rhinopoma    | GGGCACCGGATATGATGAGAAACTTGTCGGGAAGTGAAGGCCTCGAGG   | [3270] |
| Emballonura  | GGGCACCGGCTATGATGAGAAACTTGTCGGGAAGTGAAGGCCTGGAGG   | [3210] |
| Cow          | GGGCACCGGCTACGATGAGAAACTGGTCCGCGAAGTGAAGGTCTCGAGG  | [3246] |
| Pangolin     | GGGCACCGGATATGATGAGAAACTGGTCCGGGAAGTGAAGGCCTGGAGG  | [3252] |
| Whale        | GGGCACCTGGGTATGATGAGAAACTTGTCGGGAAGTGAAGGCCTCGAGG  | [3246] |

[ 3310 3320 3330 3340 3350 ]  
[ . . . . . ]

|              |                                                   |          |
|--------------|---------------------------------------------------|----------|
| Tonatia      | CTTCTGGCTCAGTCTACATCTGCACCTTGTGTGATGCCACCCGCTGGAA | [ 3239 ] |
| Myotis       | CTTCTGGCTCCGTCTACATCTGCACCCTTTGTGATGCCACCCGCTGGAG | [ 3278 ] |
| Tadarida     | CTTCCGGATCCGTCTACATCTGCACCCTTTGTGATGCCACCCGCTGGAA | [ 3266 ] |
| Taphozous    | CTTCTGGCTCAGTCTACATCTGTACCCTTTGTGATGCCACCCGCTGGAA | [ 3272 ] |
| Megaderma    | CTTCCGGCTCGGTCTACATCTGTACCCTTTGTGATGCCACCCGCTGGAA | [ 3281 ] |
| Cynopterus   | CTTCTGGCTCAGTCTACATCTGTACCCTTTGTGATGCCACCCGCTGGAA | [ 3293 ] |
| Pteropus     | CTTCTGGCTCAGTCTACATTTGTACCCTTTGTGATACTACCCGCTGGAA | [ 3278 ] |
| Hipposideros | CTTCTGGCTCGGTCTACATCTGTACCCTGTGTGATGCCACCCGCTGGAA | [ 3317 ] |
| Cat          | CTTCTGGCTCAGTCTACATTTGTACCCTTTGTGATGCCACCCGCTGGAG | [ 3320 ] |
| Human        | CTTCTGGCTCAGTCTACATTTGTACTCTTTGTGATGCCACCCGCTGGAA | [ 3314 ] |
| Mouse        | CTTCTGGCTCAGTCTACATCTGTACTCTGTGACACCACCCGTTTGGAA  | [ 3212 ] |
| Flyinglemur  | CTTCTGGCTCAGTCTACATTTGTACTCTTTGTGATGCCACCCGCTGGAA | [ 3323 ] |
| NycterisG    | CTTCTGGCTCAGTCTACATTTGTACCCTCTGTGATGCCACACGCTGGAA | [ 3224 ] |
| Antrozous    | CGTCTGGCTC?GTCTACATCTGCACCCTCTGTGATGCCACCCGCTAGAA | [ 3269 ] |
| Rhogeessa    | CGTCTGGCTCTGTCTACATCTGCACCCTTTGTGATGCCACCCGCTGGAG | [ 3287 ] |
| Noctilio     | CTTCTGGCTCAGTCTACATCTGCACCCTCTGCGATGCCACCCGCTGGAA | [ 3275 ] |
| Natalus      | CTTCCGGCTCAGTCTACATCTGCACCCTTTGTGATGCCACCCGCTAGAA | [ 3272 ] |
| Rhinolophus  | CTTCTGGCTCAGTCTACATCTGTACCCTGTGTGATGCCACCCGCTGGAA | [ 3308 ] |
| Rousettus    | CTTCTGGCTCAGTCTACATTTGTACCCTTTGTGATGCCACCCGCTGGAA | [ 3281 ] |
| NycterisT    | CTTCTGGCTCGGTCTACATTTGTACCCTCTGTGATGCCACACGCTGGAA | [ 3248 ] |
| Nyctimene    | CTTCTGGCTCAGTCTACATTTGTACCCTTTGTGATGCCACCCGCTGGAA | [ 3296 ] |
| Mole         | CTTCTGGCTCAGTCTATATTTGTACCCTCTGTGATGCCACCCGCTGGAA | [ 3308 ] |
| Horse        | CTTCCGGCTCGGTCTACATCTGTACCCTTTGTGATGCCACCCGCTGGAA | [ 3302 ] |
| Desmodus     | CTTCTGGCTCGGTCTACATCTGCACCCTTTGTGATGCCACCCGCTGGAA | [ 3248 ] |
| Rhinopoma    | CTTCTGGCTCCGTCTACATTTGTACCCTTTGTGATGCCACCCGCTGGAA | [ 3320 ] |
| Emballonura  | CTTCTGGCTCAGTCTACATCTGTACCCTTTGTGATGCCACCCGCTGGAA | [ 3260 ] |
| Cow          | CTTCCGGCTCAGTCTACATTTGCACCCTTTGTGATGCCACTCGCTGGAG | [ 3296 ] |
| Pangolin     | CTTCTGGCTCAGTGTACATTTGTACTCTATGCGACGCCACCCGCTGGAA | [ 3302 ] |
| Whale        | CTTCCGGCTCAGTCTACATTTGTACCCTTTGTGATGCCACCCGCTGGAA | [ 3296 ] |

[ 3360 3370 3380 3390 3400 ]  
[ . . . . . ]

|              |                                                    |          |
|--------------|----------------------------------------------------|----------|
| Tonatia      | GCCTCTCAAAACCTTGTCTTCCACTCCATAACCAGAAGCCACGCGGAGAA | [ 3289 ] |
| Myotis       | GCTTCTCAAAACCTTGTCTTCCACTCCATAACCAGAAGCCATGCCGAAAA | [ 3328 ] |
| Tadarida     | GCCTCTCAAAACCTTGTCTTCCACTCCATAACCAGAAGCCACGCGGAGAA | [ 3316 ] |
| Taphozous    | GCCTCTCAAAACCTTGTCTTCCACTCCATAACCAGAAGCCACACCGAGAA | [ 3322 ] |
| Megaderma    | GCCTCTCAGAACCTTGTCTTCCACTCCATCACCAGGAGCCACGCGGAGAA | [ 3331 ] |
| Cynopterus   | GCCTCTCAGAATCTTGTCTTCCACTCCATCACCAGAAGCCATTCGGAGAA | [ 3343 ] |
| Pteropus     | GCCTCTCAGAATCTTGTCTTCCACTCCATAACCAGAAGCCATTCAGAGAA | [ 3328 ] |
| Hipposideros | GCCTCTCAAAATCTTGTCTTCCACTCCATCACCAGAAGCCATACAGAGAA | [ 3367 ] |
| Cat          | GCCTCTCAAAATCTTGTCTTCCACTCCATAACCAGAAGCCACTCTGAGAA | [ 3370 ] |
| Human        | GCCTCTCAAAATCTTGTCTTCCACTCTATAACCAGAAGCCATGCTGAGAA | [ 3364 ] |
| Mouse        | GCCTCTCAGAATCTTGTCTTCCACTCCATAACCAGAAGCCACGCGGAGAA | [ 3262 ] |
| Flyinglemur  | GCCTCTCAAAATCTTGTCTTCCACTCCATAACCAGGAGCCATGCCGAGAA | [ 3373 ] |
| NycterisG    | GCCTCTCAAAACCTTGTCTTCCACTCCATAACCAGAAGCCATGCTGAAAA | [ 3274 ] |
| Antrozous    | GCTTCTCAAAACCTTGTCTTCCACTCCATAACCAGAAGCCATGCCGAAAA | [ 3319 ] |
| Rhogeessa    | GCTTCTCAAAACCTTGTCTTCCACTCCATAACCAGAAGCCATGCCGAAAA | [ 3337 ] |
| Noctilio     | GCCTCTCAGAATCTTGTCTTCCACTCCATAACCAGAAGCCACGCGGAGAA | [ 3325 ] |
| Natalus      | GCCTCTCAAAACCTTGTCTTCCACTCCATAACCAGAAGCCATGCCGAGAA | [ 3322 ] |
| Rhinolophus  | GCCTCTCAAAATCTTGTCTTCCACTCCATAACCAGAAGCCATACAGAGAA | [ 3358 ] |
| Rousettus    | GCCTCTCAGAATCTTGTCTTCCACTCCATAACCAGAAGCCATTCGGAGAA | [ 3331 ] |
| NycterisT    | GCCTCTCAAAACCTTGTCTTCCACTCCATAACCAGAAGCCATGCTGAAAA | [ 3298 ] |
| Nyctimene    | GCCTCTCAAAATCTTGTCTTCCACTCTATAACCAGAAGCCATTCAGAGAA | [ 3346 ] |
| Mole         | GCATCCCAAAACCTTGTCTTCCACTCCATAACCAGAAGCCATACCGAAAA | [ 3358 ] |
| Horse        | GCCTCTCAAAATCTTGTCTTCCACTCCATAACCAGAAGCCACGCTGAGAA | [ 3352 ] |
| Desmodus     | GCCTCGCAAAACCTTGTCTTCCACTCCATAACCAGAAGCCACGCGGAGAA | [ 3298 ] |
| Rhinopoma    | GCCTCTCAAAATCTTGTCTTCCACTCCATCACCAGAAGCCATGCAGAGAA | [ 3370 ] |
| Emballonura  | GCCTCTCAGAACCTTGTCTTCCACTCCATAACCAGAAGCCATGCCGAGAA | [ 3310 ] |
| Cow          | GCCTCTCAAAATCTTGTCTTCCACTCCATAACCAGAAGCCACGCTGAGAA | [ 3346 ] |
| Pangolin     | GCCTCCCAAAATCTTGTCTTCCACTCCATCACCAGAAGCCATGCCGAGAA | [ 3352 ] |
| Whale        | GCCTCTCAAAATCTTGTCTTCCACTCCATCACCAGAAGCCACGTTGATAA | [ 3346 ] |

[ 3410 3420 3430 3440 3450 ]  
[ . . . . . ]

|            |                                                    |          |
|------------|----------------------------------------------------|----------|
| Tonatia    | CCTGGAGCGCTATGAGGTCTGGCGTTCCAACCCATTCCATGAGTCCGTGG | [ 3339 ] |
| Myotis     | CCTGGAGCGCTATGAGGTCTGGCGATCCAACCCCTACCACGAGTCTGTGG | [ 3378 ] |
| Tadarida   | CCTGGAGCGCTATGAGGTCTGGCGTTCCAACCCCTACCACGAGTCTGTGG | [ 3366 ] |
| Taphozous  | CCTGGAGCGCTATGAGGTCTGGCGTTCCAACCCGTACCATGAGTCTGTGG | [ 3372 ] |
| Megaderma  | CTTGGAGCGCTATGAGGTCTGGCGCTCCAACCCCTACCACGAGACCGTGG | [ 3381 ] |
| Cynopterus | CTTGGAGCGCTATGAGGTCTGGCGCTCCAACCCCTACCATGAGTCTGTGG | [ 3393 ] |

|              |                                                     |          |
|--------------|-----------------------------------------------------|----------|
| Pteropus     | CTTGGAGCGCTATGAGGTTTGGCGCTCCAACCCGTACCATGAGTCTGTGG  | [ 3378 ] |
| Hipposideros | CTTGGAGCGCTATGAGGTTTGGCGTTCCAACCCGTACCAGGAGTCTGCGG  | [ 3417 ] |
| Cat          | CCTGGAGCGCTACGAGGTTTGGCGTTCCAACCCGTACCACGAGTCTGTGG  | [ 3420 ] |
| Human        | CCTGGAACGTTATGAGGTTTGGCGTTCCAACCCGTACCATGAGTCTGTGG  | [ 3414 ] |
| Mouse        | CCTGCAGCGCTATGAGGTTTGGCGTTCCAACCCGTATCATGAGTCCGTGG  | [ 3312 ] |
| Flyinglemur  | CCTGGAACGCTATGAGGTTTGGCGTTCCAACCCGTACCACGAGTCTGTGG  | [ 3423 ] |
| NycterisG    | CCTGGAGCGCTACGAGGTTTGGCGTTCCAACCCGTACCACGAGTCTGTGG  | [ 3324 ] |
| Antrozous    | CCTGGAGCGCTATGAGGTTTGGCGTTCCAACCCGTACCACGAGTCTGTGG  | [ 3369 ] |
| Rhogeessa    | CCTGGAGCGCTATGAGGTTTGGCGTTCCAACCCGTACCACGAGTCTGTGG  | [ 3387 ] |
| Noctilio     | CCTGGAGCGCTACGAGGTTTGGCGTTCCAACCCGTACCACGAGTCTGTGG  | [ 3375 ] |
| Natalus      | CCTGGAACGCTACGAGGTTTGGCGTTCCAACCCGTACCACGAGTCTGTGG  | [ 3372 ] |
| Rhinolophus  | CTTGGAGCGCTATGAGTTTGGCGCTCCAACCCGTACCATGAGTCTGTGG   | [ 3408 ] |
| Rousettus    | CTTGGAGCGCTATGAGGTTTGGCGTTCCAACCCGTACCATGAGTCTGTGG  | [ 3381 ] |
| NycterisT    | CCTGGAGCGCTACGAGGTTTGGCGTTCCAACCCGTACCACGAGTCTGTGG  | [ 3348 ] |
| Nyctimene    | CCTGGAGCGCTATGAGGTTTGGCGTTCCAACCCGTACCATGAGTCTGTGG  | [ 3396 ] |
| Mole         | CCTGGAGCGCTATGAGGTTTGGCGTTCCAACCCGTACCATGAGTCCGTGG  | [ 3408 ] |
| Horse        | CCTGGAGCGCTATGAGGTTTGGCGTTCCAACCCGTACCATGAGTCTGTGG  | [ 3402 ] |
| Desmodus     | CCTGGAGCGATATGAGGTTTGGCGTTCCAACCCGTACCATGAGTCTGTGG  | [ 3348 ] |
| Rhinopoma    | CTTGGAGCGCTATGAGGTTTGGCGTTCCAACCCGTACCACGAGTCCGTAG  | [ 3420 ] |
| Emballonura  | CCTGGCAGCGCTATGAGGTTTGGCGTTCCAACCCGTACCATGAGTCTGTGG | [ 3360 ] |
| Cow          | TCTGGAGCGCTATGAGGTTTGGCGTTCCAACCCGTACCATGAGACGGTGG  | [ 3396 ] |
| Pangolin     | CCTGGAGCGCTACGAGGTTTGGCGTTCCAACCCGTACCACGAGTCTGTGG  | [ 3402 ] |
| Whale        | TCTGGAGCGCTATGAGGTTTGGCGTTCCAACCCGTACCATGAGACGGTGG  | [ 3396 ] |

[ 3460 3470 3480 3490 3500 ]  
[ . . . . . ]

|              |                                                    |          |
|--------------|----------------------------------------------------|----------|
| Tonatia      | AAGAACTCCGGGATCGGGTGAAAGGGGTCTCAGCCAAGCCCTTCATTGAG | [ 3389 ] |
| Myotis       | AAGAACT?CGGGATCGGGTGAAAGGGGTCTCGGCCAAGCCCTTCATCGAG | [ 3428 ] |
| Tadarida     | AAGAGCTCCGGGATCGGGTGAAAGGGGTCTCGGCCAAGCCCTTCATCGAG | [ 3416 ] |
| Taphozous    | AAGAACTCCGGGATCGGGTGAAAGGGGTCTCAGCCAACCCCTTCATTGAG | [ 3422 ] |
| Megaderma    | AGGAGCTCGCGACCCGGTGAAAGGGGTCTCGGCCAAGCCCTTCATCGAG  | [ 3431 ] |
| Cynopterus   | AAGAACTGAGGGACCCGGTCAAAGGGGTCTCAGCCAACCCCTTCATTGAG | [ 3443 ] |
| Pteropus     | AAGAACTCGGGACCCGGTCAAAGGGGTCTCAGCCAAGCCCTTCATTGAG  | [ 3428 ] |
| Hipposideros | AAGAACTCGCGATCGGGTGAAAGGGGTCTCAGCCAAGCCCTTCATTGAG  | [ 3467 ] |
| Cat          | AAGAACTCGGGATCGCGTGAAAGGAGTCTCATCGAAACCTTCATTGAG   | [ 3470 ] |
| Human        | AAGAACTCGGGATCGGGTGAAAGGGGTCTCAGCTAAACCTTCATTGAG   | [ 3464 ] |
| Mouse        | AAGAGCTCCGGGACCCGGTGAAAGGGGTCTCGCCAACCCCTTCATCGAG  | [ 3362 ] |
| Flyinglemur  | AAGAACTTCGGGATCGGGTGAAAGGGGTCTCAGCAAACCTTCATTGAG   | [ 3473 ] |
| NycterisG    | AGGAACTCCGGGATCGGGTGAAAGGGGTCTCGGCCAAGCCCTTCATTGAG | [ 3374 ] |
| Antrozous    | AGGAACTCCGGGATCGGGTGAAAGGGGTCTCGGCCAAGCCCTTCATTGAG | [ 3419 ] |
| Rhogeessa    | AAGAACTCCGGGATCGGGTGAAAGGGGTCTCGGCCAAGCCCTTCATCGAG | [ 3437 ] |
| Noctilio     | AAGAACTCCGGGATCGGGTGAAAGGGGTCTCGGCCAAGCCCTTCATTGAG | [ 3425 ] |
| Natalus      | AGGAGCTCCGGGATCGGGTGAAAGGGGTCTCGGCCAAGCCCTTCATTGAG | [ 3422 ] |
| Rhinolophus  | AAGAACTCGCGATCGGGTGAAAGGGGTCTCAGCCAAGCCCTTCATTGAG  | [ 3458 ] |
| Rousettus    | AAGAACTCGGGACCCGGTCAAAGGGGTCTCGGCCAAGCCCTTCATTGAG  | [ 3431 ] |
| NycterisT    | AGGAACTCCGGGATCGGGTGAAAGGGGTCTCGGCCAAGCCCTTCATTGAG | [ 3398 ] |
| Nyctimene    | AAGAACTCGGGACCCGGTCAAAGGGGTCTCGGCCAAGCCCTTCATTGAG  | [ 3446 ] |
| Mole         | AAGATTGAGGGATCGCGTGAAAGGGGTCTCGGCCAAGCCCTTCATTGAG  | [ 3458 ] |
| Horse        | AAGAATTGCGGGATCGGGTGAAAGGGGTCTCGGCCAAGCCCTTCATCGAG | [ 3452 ] |
| Desmodus     | AAGAACTCCGGGATCGGGTGAAAGGGGTCTCGGCCAAGCCCTTCATTGAG | [ 3398 ] |
| Rhinopoma    | AGGAGCTCGCGATCGGGTGAAAGGGGTCTCAGCCAAGCCCTTCATTGAG  | [ 3470 ] |
| Emballonura  | AGGAACTCCGGGATCGGGTGAAAGGGGTCTCGGCCAAGCCCTTCATTGAG | [ 3410 ] |
| Cow          | AGGAACTCGGGACCCGGTGAAAGGGGTCTCGGCCAAGCCCTTCATTGAG  | [ 3446 ] |
| Pangolin     | AAGAACTCGGGACAGGGTGAAAGGGGTCTCGGCCAAGCCCTTCATTGAG  | [ 3452 ] |
| Whale        | AGGAACTCGGGACCCGGTGAAAGGGGTCTCGGCCAAGCCCTTCATTGAG  | [ 3446 ] |

[ 3510 3520 3530 3540 3550 ]  
[ . . . . . ]

|              |                                                    |          |
|--------------|----------------------------------------------------|----------|
| Tonatia      | ACTGTCCCTTCCATAGATGCACTCCACTGTGACATTGGCAATGCAGCTGA | [ 3439 ] |
| Myotis       | ACCGTCCCTTCCATAGATGCACTCCACTGTGACATTGGCAATGCAGCTGA | [ 3478 ] |
| Tadarida     | ACCGTCCCTTCCATAGATGCACTCCACTGTGACATTGGCAATGCAGCTGA | [ 3466 ] |
| Taphozous    | ACAGTCCCTTCCATAGATGCACTCCACTGTGACATTGGCAATGCAGCTGA | [ 3472 ] |
| Megaderma    | ACGGTCCCTTCCATAGATGCACTCCACTGTGACATTGGCAATGCAGCTGA | [ 3481 ] |
| Cynopterus   | ACAGTCCCTTCCATAGATGCACTCCACTGTGACATTGGCAATGCAGCTGA | [ 3493 ] |
| Pteropus     | ACAGTCCCTTCCATAGATGCACTCCACTGTGACATTGGCAATGCAGCTGA | [ 3478 ] |
| Hipposideros | ACAGTCCCTTCCATAGATGCACTCCACTGTGACATTGGCAATGCAGCTGA | [ 3517 ] |
| Cat          | ACCGTCCCTTCCATAGATGCACTCCACTGTGACATTGGCAATGCAGCTGA | [ 3520 ] |
| Human        | ACAGTCCCTTCCATAGATGCACTCCACTGTGACATTGGCAATGCAGCTGA | [ 3514 ] |
| Mouse        | ACAGTCCCTTCCATAGATGCACTCCACTGTGACATTGGCAATGCAGCTGA | [ 3412 ] |
| Flyinglemur  | ACAGTCCCTTCCATAGATGCACTCCACTGTGACATTGGCAATGCAGCTGA | [ 3523 ] |
| NycterisG    | ACCGTCCCTTCCATAGATGCACTCCACTGTGACATTGGCAATGCAGCTGA | [ 3424 ] |



|             |                                                    |        |
|-------------|----------------------------------------------------|--------|
| Antrozous   | ACAGTCCCTTCCATAGATGCCCTCCACTGTGACATTGGCAATGCAGCCGA | [3469] |
| Rhogeessa   | ACAGTCCCTTCCATAGATGCCCTCCACTGTGACATTGGCAATGCAGCCGA | [3487] |
| Noctilio    | ACGGTCCCTTCCATAGACGCACTCCACTGTGACATTGGCAATGCGGCTGA | [3475] |
| Natalus     | ACGGTGCCTTCCATAGACGCGCTCCACTGCGACATTGGCAACGCGGCTGA | [3472] |
| Rhinolophus | ACAGTCCCTTCCATAGATGCACTCCACTGTGACATTGGCAATGCTGCGGA | [3508] |
| Rousettus   | ACAGTCCCTTCCATAGACGCACTCCACTGTGACATTGGCAATGCAGCTGA | [3481] |
| NycterisT   | ACCGTCCCTTCCATAGATGCCCTCCACTGTGACATTGGTAATGCGGCTGA | [3448] |
| Nyctimene   | ACAGTCCCTTCCATAGATGCACTCCACTGTGACATTGGCAATGCAGCTGA | [3496] |
| Mole        | ACAGTCCCTTCCATAGATGCCCTTCACTGTGACATTGGCAACGCGGCTGA | [3508] |
| Horse       | ACAGTCCCTTCCATAGATGCGCTCCACTGCGACATTGGCAATGCAGCTGA | [3502] |
| Desmodus    | ACTGTCCCTTCCATAGATGCACTCCACTGTGACATTGGCAATGCAGCTGA | [3448] |
| Rhinopoma   | ACAGTCCCTTCCATCGACGCACTCCACTGTGACATTGGCAACGCGGCTGA | [3520] |
| Emballonura | ACAGTCCCTTCCATAGACGCACTCCACTGTGACATTGGCAATGCGGCTGA | [3460] |
| Cow         | ACGGTCCCTTCCATAGATGCCCTCCACTGCGACATCGGCAATGCGGCTGA | [3496] |
| Pangolin    | ACAGTCCCTTCCATCGACGCTTCCACTGTGACATCGGCAATGCGGCTGA  | [3502] |
| Whale       | ACGGTCCCTTCCATAGATGCACTCCACTGCGACATCGGCAACGCGCTGA  | [3496] |

[ 3560 3570 3580 3590 3600 ]  
[ . . . . . ]

|              |                                                     |        |
|--------------|-----------------------------------------------------|--------|
| Tonatia      | GTTCTACAAGATTTTCCAGCTAGAGATAGGGGAGGTGTATAAGAATCCCA  | [3489] |
| Myotis       | GTTCTATAAGATCTTCCAGCTAGAGATCGGGGAGGTGTATAGGAATCCCA  | [3528] |
| Tadarida     | GTTCTACAAGATTTTCCAGCTGGAGATAGGGGAGGTGTATAAGAATCCCA  | [3516] |
| Taphozous    | GTTCTACAAGATTTTCCAGCTAGAGATAGGGGAGGCATATAAGAATCCCA  | [3522] |
| Megaderma    | GTTCTACAAGATCTTCCAGCTGGAGATAGGGGAGGTGTACAAGAACCCCA  | [3531] |
| Cynopterus   | GTTCTACAAGATTTTCCAGCTAGAGATAGGGGAGGTGTATAAGAATCCCA  | [3543] |
| Pteropus     | GTTCTACAAGATTTTCCAGCTAGAGATAGGGGAGGTGTATAAGAATCCCA  | [3528] |
| Hipposideros | ATTCTACAAGATTTTCCAACCTGGAGATTTGGGAGGTGTATAAGAATCCCA | [3567] |
| Cat          | GTTCTACAAGATTTTCCAGCTAGAGATAGGGGAGGTGTACAAGAATCCCA  | [3570] |
| Human        | GTTCTACAAGATCTTCCAGCTAGAGATAGGGGAAGTGTATAAGAATCCCA  | [3564] |
| Mouse        | ATTCTATAAGATTTTCCAGCTGGAGATAGGGGAAGTGTATAAACATCCCA  | [3462] |
| Flyinglemur  | GTTCTACAAGATCTTCCAGCTAGAGATAGGGGAAGTGTACAAGAATCCCA  | [3573] |
| NycterisG    | GTTCTACAAGATTTTCCAACCTAGAGATAGGGGAGGTGTATAGGAATCCCA | [3474] |
| Antrozous    | GTTCTACAAGATCTTCCAGCTAGAGATCGGGGAGGTGTACAGGAATCCCA  | [3519] |
| Rhogeessa    | GTTCTACAAGATCTTCCAGCTAGAGATCGGGGAGGTGTATAGGAATCCCA  | [3537] |
| Noctilio     | GTTCTACAAGATTTTCCAGCTAGAGATAGGGGAGGTGTACAAGAATCCCA  | [3525] |
| Natalus      | GTTCTACAAGATTTTCCAGCTGGAGATAGGGGAGGTGTATAAGAATCCCA  | [3522] |
| Rhinolophus  | GTTCTACAAGATTTTCCAACCTAGAGATAGGGGAGGTGTATAAGAACCCCA | [3558] |
| Rousettus    | GTTTCTACAAGATTTTCCAGCTAGAGATAGGGGAGGTGTATAAGAATCCCA | [3531] |
| NycterisT    | GTTCTACAAGATTTTCCAACCTAGAGATAGGAGAGGTGTATAAGAATCCCA | [3498] |
| Nyctimene    | GTTCTACAAGATTTTCCAGCTAGAGATAGGGGAGGTGTATAAGAATCCCA  | [3546] |
| Mole         | GTTCTACAAGATCTTCCAGCTAGAGATAGGGGAGGTGTATAAGAATCCCA  | [3558] |
| Horse        | GTTCTACAAGATCTTCCAGCTAGAGATTTGGGAGGTGTATAAGAACCCCA  | [3552] |
| Desmodus     | GTTCTACAAGATTTTCCAGCTAGAGATAGGGGAGGTGTATAAGAATCCCA  | [3498] |
| Rhinopoma    | GTTCTACAAGATATTCCAACCTGGAGATCGGGGAGGTGTACCAGAACCCCA | [3570] |
| Emballonura  | GTTCTACAAGATTTTCCAGCTAGAGATAGGGGAGGCGTATAAGAATCCCA  | [3510] |
| Cow          | GTTCTACAAGATCTTCCAGCTGGAGATCGGAGAGGTGTATAAGAACCCCA  | [3546] |
| Pangolin     | GTTCTACAAGATTTTCCAGCTCGAGATAGGGGAGGTGTATAAGAATCCCA  | [3552] |
| Whale        | GTTCTACAAGATTTTCCAGCTGGAGATAGGGGAGGTGTATAAGAACCCCA  | [3546] |

[ 3610 3620 3630 3640 3650 ]  
[ . . . . . ]

|              |                                                    |        |
|--------------|----------------------------------------------------|--------|
| Tonatia      | GTGCCTCAAAGAGGAAAGGAAAAGGTGGCAGGCTACCTTGGACAAGCAT  | [3539] |
| Myotis       | ACGCCTCAAAGGAGGAGAGGAAAAGGTGGCAGGCCACACTGGACAAGCAT | [3578] |
| Tadarida     | ATGCCTCAAAGAGGAAAGGAAAGATGGCAGGCCACACTGGACAAGCAT   | [3566] |
| Taphozous    | ATGCTTCAAAGAGGAAAGGAAAAGATGGCAGGCTACACTGGACAAGCAC  | [3572] |
| Megaderma    | ATGCCTCAAAGAGGAGAGGAAAAGATGGCAGGCTACCTTGGACAAGCAT  | [3581] |
| Cynopterus   | GTGCCTCAAAGAGGAAAGGAAAAGATGGCAGGCGACACTGGACAAGCAC  | [3593] |
| Pteropus     | GTGCCTCAAAGAGGAAAGGAAAAGATGGCAGGCCACACTGGACAAGCAT  | [3578] |
| Hipposideros | ATGCCTCAAAGAGGAAAGGAAAAGATGGCAGGCGACACTGGACAAGCAT  | [3617] |
| Cat          | ATGCCTCAAAGAGGAAAGGAAAAGGTGGCAGGCTACGCTGGACAAGCAT  | [3620] |
| Human        | ATGCCTCAAAGAGGAAAGGAAAAGGTGGCAGGCCACACTGGACAAGCAT  | [3614] |
| Mouse        | ATGCCTCAAAGAGGAAAGGAAAAGATGGCAGGCCACGCTGGACAACAT   | [3512] |
| Flyinglemur  | ATGCTTCAAAGAGGAAAGGAAAAGATGGCAGGCCACACTGGACAAGCAT  | [3623] |
| NycterisG    | ATGCCTCAAAGAGGAAAGGAAAAGATGGCAGGCTACACTGGACAAGCAT  | [3524] |
| Antrozous    | GCGCTCAAAGGAGGAGAGGAAAAGGTGGCAGGCCGCGCTGGACAAGCAT  | [3569] |
| Rhogeessa    | ATGCCTCAAAGGAGGAGGAAAAGGTGGCAGGCCACGCTGGACAAGCAT   | [3587] |
| Noctilio     | ACGCCTCAAAGAGGAAAGGAAAAGATGGCAGGCTACACTGGACAAGCAT  | [3575] |
| Natalus      | GCGCTCAAAGAGGAGAGGAAAAGGTGGCAGGCTACCTTGGACAACAT    | [3572] |
| Rhinolophus  | ATGCTTCAAAGAGGAAAGGAAAAGATGGCAGGCTACGTTGGACAAGCAT  | [3608] |
| Rousettus    | ATGCCTCAAAGAGGAAAGGAAAAGATGGCAGGCGACACTGGACAAGCAT  | [3581] |
| NycterisT    | ATGCCTCAAAGGAGGAGAGGAAAAGATGGCAGGCTACACTGGACAAGCAT | [3548] |

|             |                                                     |        |
|-------------|-----------------------------------------------------|--------|
| Nyctimene   | GTGCCTCTAAAGAGGAAAGGAAAAGATGGCAGGCGACTCTGGACAAGCAT  | [3596] |
| Mole        | ATGCCTCCAAAGAGGAAAGGAAAAGATGGCAGGCTACACTGGACAAACAC  | [3608] |
| Horse       | ATGCCTCCAAAGAGGAAAGGAAAAGATGGCAGGCTACGCTGGACAAACAT  | [3602] |
| Desmodus    | GTGCCTCCAAAGAGGAAAGGAAAAGATGGCAGGCTACCTTTGGACAAGCAC | [3548] |
| Rhinopoma   | GTGCCTCCAAAGAGGAAAGGAAAAGATGGCAGGCCACATTGGATAAGCAT  | [3620] |
| Emballonura | ATGCTTCCAAAGAGGAGAGGAAAAGATGGCAGGCTACACTGGACAAGCAT  | [3560] |
| Cow         | ACGCTTCCAAAGAGGAAAGGAAAAGATGGCAGGCTACCCTGGACAAGCAC  | [3596] |
| Pangolin    | ATGCCTCCAAAGAGGAGAGGAAAAGATGGCAGGCTACCCTGGACAAGCAT  | [3602] |
| Whale       | GTGCCTCCAAAGAGGAGAGGAAAAGATGGCAGGCTGCCTTTGGACAAGCAC | [3596] |

[ 3660 3670 3680 3690 3700 ]  
[ . . . . . ]

|              |                                                     |        |
|--------------|-----------------------------------------------------|--------|
| Tonatia      | CTCCGGAAGAAGATGAACCTGAAACCAATCATGAGGATGAATGGCAACTT  | [3589] |
| Myotis       | CTCCGGAAGAAGATGAACCTCAAACCCATCATGAGGATGAATGGCAACTT  | [3628] |
| Tadarida     | CTCCGGAAGAAGATGAGCCTGAAACCGATCATGAGGATGAATGGCAACTT  | [3616] |
| Taphozous    | CTCCGGAAGAAGATGAACCTAAAACCAATCATGAGGATGAATGGCAACTT  | [3622] |
| Megaderma    | CTCCGGAAGAAGATGAACCTGAAACCGATCATGAGGATGAACGGCAACTT  | [3631] |
| Cynopterus   | CTCCGGAAGAGGATGAACCTGAAACCCATCATGAGAATGAATGGCAACTT  | [3643] |
| Pteropus     | CTCCGGAAGAAGATGAACCTGAAACCAATCATGAGAATGAATGGCAACTT  | [3628] |
| Hipposideros | CTCCGGAAGAAGATGAACCTGAAACCCATCATGAGGATGAACGGCAACTT  | [3667] |
| Cat          | CTCCGGAAGAAGATGAACCTGAAGCCAATCATGAGGATGAATGGCAACTT  | [3670] |
| Human        | CTCCGGAAGAAGATGAACCTCAAACCAATCATGAGGATGAATGGCAACTT  | [3664] |
| Mouse        | CTCCGGAAGAAGATGAACCTAAAACCAATCATGAGGATGAATGGCAACTT  | [3562] |
| Flyinglemur  | CTCCGGAAGAAGATGAACCTAAAACCAATCATGAGGATGAATGGCAACTT  | [3673] |
| NycterisG    | CTCCGGAAGAAGATGAACCTTAAACCAATCATGAGGATGAATGGCAACTT  | [3574] |
| Antrozous    | CTCCGGAAGAAGATGAACCTCAAGCCATCATGAGGATGAATGGCAACTT   | [3619] |
| Rhogeessa    | CTCCGGAAGAAGATGAACCTCAAACCCATCATGAGGATGAATGGCAACTT  | [3637] |
| Noctilio     | CTCCGGAAGAAGATGAACCTGAAACCCATCATGAGGATGAATGGCAACTT  | [3625] |
| Natalus      | CTCCGGAAGAAGATGAACCTAAAACCAATCATGAGGATGAATGGCAACTT  | [3622] |
| Rhinolophus  | CTCCGGAAGAAGATGAACCTGAAACCAATCATGCGGATGAACGGTAACTT  | [3658] |
| Rousettus    | CTCCGGAAGAAGATGAACCTGAAACCAATCATGAGAATGAATGGCAACTT  | [3631] |
| NycterisT    | CTCCGGAAGAAGATGAACCTTAAACCAATCATGAGGATGAACGGCAACTT  | [3598] |
| Nyctimene    | CTCCGGAAGAAGATGAACCTGAAACCAATCATGAGAATGAATGGCAACTT  | [3646] |
| Mole         | CTTAGAAAAGAAGATGAACCTGAAGCCAATCATGAGGATGAATGGCAACTT | [3658] |
| Horse        | CTCCGGAAGAAGATGAACCTGAAACCAATCATGAGGATGAATGGCAACTT  | [3652] |
| Desmodus     | CTCCGGAAGAAGATGAACCTGAAGCCAATCATGAGGATGAATGGCAACTT  | [3598] |
| Rhinopoma    | CTCCGGAAGAAGATGAACCTGAAACCCATCATGAGGATGAACGGCAACTT  | [3670] |
| Emballonura  | CTTCGGAAGAAGATGAACCTAAAACCAATCATGAGGATGAATGGCAACTT  | [3610] |
| Cow          | CTCCGGAAGAAGATGAACCTGAAGCCAATCATGAGGATGAACGGCAACTT  | [3646] |
| Pangolin     | CTCCGGAAGAAGATGAACCTGAAACCAATCATGAGGATGAACGGCAACTT  | [3652] |
| Whale        | CTCCGGAAGAAGATGAATCTGAAACCAATCATGAGGATGAATGGCAACTT  | [3646] |

[ 3710 3720 3730 3740 3750 ]  
[ . . . . . ]

|              |                                                    |        |
|--------------|----------------------------------------------------|--------|
| Tonatia      | TGCCAGGAAGCTCATGACCAAAGAGACTGTTGAAGCTGTGTGAACTAA   | [3639] |
| Myotis       | TGCCAGGAAGCTCATGACCAAAGAGACTGTGGAGGC?GTTTGTGAGTTAA | [3678] |
| Tadarida     | TGCCAGGAAGCTCATGACCAAAGAGACCGTTGAGGCCGTTTGTGAGTTAA | [3666] |
| Taphozous    | TGCCAGGAAGCTCATGACCAAAGAGACTGTTGAAGCTGTTTGTGAATTAA | [3672] |
| Megaderma    | TGCCAGGAAGCTCATGACCAAAGAGACTGTGCAAGCAGTTTGTGAATTAA | [3681] |
| Cynopterus   | TGCCAGGAAGCTCATGACCAAAGAGACTGTGCAAGCAGTCTGTGAGCTCA | [3693] |
| Pteropus     | TGCCAGGAAGCTCATGACCAAAGAGACTGTTGAAGCAGTCTGTGAGTTAG | [3678] |
| Hipposideros | TGCCAGGAGGCTCATGACCAAAGAGACTGTTGAAGCAGTTTGCAGTTAC  | [3717] |
| Cat          | TGCCAGGAGGCTCATGACCAAAGAAACAGTTGAAGCCGTTTGTGAATTAA | [3720] |
| Human        | TGCCAGGAAGCTCATGACCAAAGAGACTGTGGATGCAGTTTGTGAGTTAA | [3714] |
| Mouse        | TGCCAGGAAGCTTATGACCAAAGAGACTGTAGAGCAGTTTGTGAGTTAA  | [3612] |
| Flyinglemur  | TGCCAGGAAGCTCATGACCAAAGAGACTGTTGATGCTGTTTGTGAGTTAA | [3723] |
| NycterisG    | TGCCAGGAGGCTCATGACCAAAGAGACCGTTGAAGCTGTTTGTGAGTTAA | [3624] |
| Antrozous    | TGCCAGGAAGCTCATGACCAAAGAGACTGTTGAGGCCGTTTGTGAGTTAA | [3669] |
| Rhogeessa    | TGCCAGGAAGCTCATGACCAAAGAGACTGTTGAGGCCGTTTGTGAGTTAA | [3687] |
| Noctilio     | TGCCAGGAAGCTCATGACCAAAGAGACTGTTGAAGCCGTTTGCAGTTAA  | [3675] |
| Natalus      | TGCCAGGAAGCTCATGACCAAAGAGACCGTTGAGGCCGTTTGTGAGCTCA | [3672] |
| Rhinolophus  | TGCCAGGAAGCTCATGACCAAAGAGACTGTTGAAGCAGTTTGTGAGTTAA | [3708] |
| Rousettus    | TGCCAGGAAGCTCATGACCAAAGAGACTGTTGAAGCAGTCTGTGAGCTAA | [3681] |
| NycterisT    | TGCCAGGAGGCTCATGACCAAAGAGACCGTTGAAGCTGTTTGTGAATTAA | [3648] |
| Nyctimene    | TGCCAGGAAGCTCATGACCAAAGAGACTGTTGAAGCAGTCTGTGAGTTAA | [3696] |
| Mole         | TGCCAGGAAGCTCATGACCAAAGAGACTGTTGAAGCAGTTTGTGAATTAA | [3708] |
| Horse        | TGCCAGGAAGCTCATGACCAAAGAGACTGTTGAAGCAGTTTGTGAATTAA | [3702] |
| Desmodus     | TGCCAGGAAGCTCATGACCAAAGAGACTGTTGAAGCCGTTTGTGAATTAA | [3648] |
| Rhinopoma    | TGCCAGGAAGCTCATGACCAAAGAGACTGTTGAAGCCGTTTGTGAGTTAA | [3720] |
| Emballonura  | TGCCAGGAAGCTCATGACCAAAGAGACTGTTGAAGCCGTTTGTGAATTAA | [3660] |
| Cow          | TGCCAGGAAGCTCATGACCAAAGAGACTGTTGAAGCCGTTTGTGAATTAA | [3696] |

Pangolin CGCCAGGAAGCTCATGACCAAAGAGACGGTTGAAGCAGTCTGTGAACTAA [3702]  
 Whale TGCCAGGAAGCTCATGACCAAAGAGACGGTTGAAGCAGTTTGTGAATTA [3696]

[ 3760 3770 3780 3790 3800 ]  
 [ . . . . . ]

Tonatia TTCCTCCGAGGAGAGGCACGAAGCCCTGAGGGAGCTGATGGACCTTTAT [3689]  
 Myotis TCCCTCCGAGGAGAGACACGAAGCTCTGAGGGAGCTGATGGACCTTTAT [3728]  
 Tadarida TCCCTCCGAGGACAGGCACGAGGCCCTGCGGGAGCTGATGGACCTCTAC [3716]  
 Taphozous TTCCTCTGAGGAGCGGCACGAAGCTTTGAGGGAGCTGATGGACCTTTAT [3722]  
 Megaderma TCCCTCCGAGGAGAGGCATGAAGCCCTGAGGGAGCTGATGGACCTTTAC [3731]  
 Cynopterus TCCCTCCGAGGAGAGGCACGAAGCTCTGAGGGAGCTGATGGACCTTTAC [3743]  
 Pteropus TCCCTCCGAGGAGAGGCATGAAGCTCTGAGGGAGCTGATGGACCTTTAC [3728]  
 Hipposideros TGCCTCCGAGGAGAGGCACGAAGCTCTGAGGGAGCTGATGGACCTTTAC [3767]  
 Cat TCCCTCCGAGGAGAGGCATGAAGCTCTCAGGGAGCTGATGGACCTTTAC [3770]  
 Human TTCCTCCGAGGAGAGGCACGAGGCTCTGAGGGAGCTGATGGATCTTTAC [3764]  
 Mouse TTCCTTCTGAGGAGAGGCATGAAGCTCTCAGGGAGCTCATGGACCTTTAC [3662]  
 Flyinglemur TTCCTTCTGAGGAGAGGCACGAAGCTCTCAGGGAGCTGATGGACCTTTAC [3773]  
 NycterisG TTCCTCTGAGGAGAGACATGAAGCTCTGAAGGAGCTGATGGACCTTTAT [3674]  
 Antrozous TTCCTCCGAGGAGAGGCATGATGCTCTGAGGGAGCTGATGGACCTTTAC [3719]  
 Rhogeessa TTCCTCTGAGGAGAGGCATGACGCTCTGAGGGAGCTGATGGACCTTTAC [3737]  
 Noctilio TCCCTCCGAGGAGAGGCACGAAGCCCTGAGGGAGCTGATGGACCTTTAY [3725]  
 Natalus TTCCTCCGAGGAGAGGCATGAAGCTCTGAGGGAGCTGATGGAGCTTTAT [3722]  
 Rhinolophus TTCCTGCGAGGAGAGGCACGAAGCTCTGAGGGAGCTGATGGACCTTTAC [3758]  
 Rousettus TTCCTCTGAGGAGAGGCATGAAGCTCTGAGGGAGCTGATGGACCTTTAT [3731]  
 NycterisT TTCCTCTGAGGAGAGGCACGAAGCTCTGAAGGAGCTGATGGACCTTTAT [3698]  
 Nyctimene TCCCTCCGAGGAGAGGCACGAAGCTCTGAGGGAGCTGATGGACCTTTAC [3746]  
 Mole TTCCTCAGAGGAGAGACATGCAGCTCTGCGGGAGCTCATGGACCTTTAT [3758]  
 Horse TTCCTCCCGGAGAGGCACGAAGCTCTGAAGGAGCTAATGGACCTTTAC [3752]  
 Desmodus TTCCTCCGAGGAGAGGCACGAAGCCCTGAGGGAGCTGATGGACCTTTAC [3698]  
 Rhinopoma TTCCTCCGAGGAGAGGCACGAAGCTCTGAGAGAGCTGATGGACCTTTAC [3770]  
 Emballonura TTCCTCCGAGGAGAGGCACGAAGCTCTGAGGGAGCTGATGGACCTCTAT [3710]  
 Cow TTCCTCCGAGGAGAGGCACGAAGCCCTGAGGGAGCTGATGGACCTTTAT [3746]  
 Pangolin TTCCTCCGAGGAGAGGCACGAAGCCCTGAGGGAGCTGATGGACCTTTAC [3752]  
 Whale TTCCTCCGAGGAGAGGCACGAAGCCCTGAGGGAACCTAATGGACCTTTAT [3746]

[ 3810 3820 3830 3840 3850 ]  
 [ . . . . . ]

Tonatia CTGAAGATGAAACCCGTGTGGCGCTCCTCATGCCCTGCTAAGGAATGCC [3739]  
 Myotis CTGAAGATGAAACCCGTGTGGCGATCGTCATGCCCGCTAAAGAGTGCCC [3778]  
 Tadarida CTGAAGATGAAAGCCCGTGTGGCGGTCATCATGTCTGCCAAAGAGTGCCC [3766]  
 Taphozous CTGAAGATGAAACCCG???????????????????????????????? [3772]  
 Megaderma CTGAAGATGAAACCCGTGTGGCGATCGTCCTGCCCTGCCAAAGAGTGCCC [3781]  
 Cynopterus CTGAAGATGAAACCTGTATGGAGATCATCATGCCCTGCTAAAGAGTGCCC [3793]  
 Pteropus CTGAAGATGAAACCTGTATGGAGATCATCATGCCCTGCTAAAGAGTGCCC [3778]  
 Hipposideros CTGAAGATGAAAGCCCGTGTGGCGATCGTCATGCCCTGCTAAAGAGTGCCC [3817]  
 Cat CTGAAGATGAAACCCGTGTGGCGATCGCATGTCCTGCTAAAGAGTGCCC [3820]  
 Human CTGAAGATGAAACCCAGTATGGCGATCATCATGCCCTGCTAAAGAGTGCCC [3814]  
 Mouse CTGAAGATGAAACCCGTGTGGCGCTCTCATGTCCCCTAAGAGTGCTCC [3712]  
 Flyinglemur CTGAAGATGAAAGCCTGTATGGCGATCATCGTCCCCTGCTAAAGAGTGCCC [3823]  
 NycterisG CTGAAGATGAAACCCGTGTGGCGATCGTCATGCCCTGCTAAAGAGTGCCC [3724]  
 Antrozous CTGAAGATGAAATCCCGTGTGGCGATCGTCATGCCCTGCTAAAGAGTGCCC [3769]  
 Rhogeessa CTGAAGATGAAACCCAGTGTGGCGATCATCATGCCCTGCTAAAGAGTGCCC [3787]  
 Noctilio CTGAAGATGAAACCCGTGTGGCGCTCGTCATGTCCTGCCAAGGAGTGCTC [3775]  
 Natalus CTGAAGATGAAACCCGTGTGGAGGTGTCATGCCCTGCTAAAGAGTGCTCC [3772]  
 Rhinolophus CTGAAGATGAAAGCCCGTGTGGCGATCTTCATGCCCTGCTAAAGAGTGCCC [3808]  
 Rousettus CTGAAGATGAAACCTGTGTGGAGATCATCATGCCCTGCTAAAGAGTGCCC [3781]  
 NycterisT CTGAAATGAAACCTGTCTGGCGATCGTCATGCCCTGCTAAAGAGTGCCC [3748]  
 Nyctimene CTGAAGATGAAACCTGTATGGAGATCATCATGCCCTGCTAAAGAGTGCCC [3796]  
 Mole CTGAAGATGAAACCTGTGTGGCGATCATCATGCCCTGCTAAGGAGTGCCC [3808]  
 Horse CTGAAGATGAAAGCCCGTGTGGCGCTCATCATGCCCGCTAAGGAGTGCCC [3802]  
 Desmodus CTGAAGATGAAACCTGTGTGGCGCTCCTCATGCCCGCTAAGGAGTGCCC [3748]  
 Rhinopoma CTGAAGATGAAACCCGTGTGGCGATCATCA???????????????????? [3820]  
 Emballonura CTGAAGATGAAACCCGTGTGGCGGTCGTCATGCCCTGCTAAGGAGTGCTC [3760]  
 Cow TTGAAGATGAAACCCCGTGTGGCGATCCTCATGTCCTGCTAAAGAGTGCCC [3796]  
 Pangolin CTGAAGATGAAACCCGTGTGGAGGTCTCATGCCCTGCTAAGGAGTGCCC [3802]  
 Whale TTGAAGATGAAACCCGTGTGGCGATCATCATGCCCTGCTAAGGAGTGCTC [3796]

[ 3860 3870 3880 3890 3900 ]  
 [ . . . . . ]

Tonatia AGAGTCTCTCTGCCAGTACAGTTTCAACTCACAGCGGTTTGTGTGAGCTCC [3789]

|              |                                                      |        |
|--------------|------------------------------------------------------|--------|
| Myotis       | AGAATCCCTCTGCCAGTATAGTTTCAATTCACAGCGTTTTGCTGAGCTCC   | [3828] |
| Tadarida     | GGAGTCCCTCTGCCAGTACAGCTTCAACTCGCAGCGTTTTGCCGAGCTTC   | [3816] |
| Taphozous    | ???????????????????????????????????????????????????? | [3822] |
| Megaderma    | AGAATCCCTCTGCCAGTATAGTTTCAATTCACAGCGTTTTGCTGAGCTCC   | [3831] |
| Cynopterus   | AGAATCTCTCTGCCAATATAGTTTCAATTCGAGCGTTTTGCTGAGCTCC    | [3843] |
| Pteropus     | AGAATCTCTCTGCCAGTATAGTTTCAATTCGAGCGTTTTGCTGAGCTCC    | [3828] |
| Hipposideros | AGAGTCTCTCTGCCAATATAGTTTCAACTCACAGCGTTTTGCTGAGCTCC   | [3867] |
| Cat          | AGAATCCCTCTGCCAGTATAGTTTCAATTCACAGCGTTTTGCTGAGCTCC   | [3870] |
| Human        | AGAATCCCTCTGCCAGTACAGTTTCAATTCACAGCGTTTTGCTGAGCTCC   | [3864] |
| Mouse        | AGAGTCCCTCTGTCAGTACAGTTTCAACTCACAGCGTTTCGCGGAAGTCC   | [3762] |
| Flyinglemur  | AGAATCTCTCTGCCAGTACAGTTTCAATTCACAGCGTTTTGCTGAGCTCC   | [3873] |
| NycterisG    | AGAATCCCTCTGCCAGTATAGTTTCAATTCACAGCGTTTTGCTGAGCTCC   | [3774] |
| Antrozous    | AGAATCCCTCTGCCAGTATAGTTTCAATTCACAGCGTTTTGCTGAGCTCC   | [3819] |
| Rhogeessa    | AGAATCCCTCTGCCAGTATAGTTTCAATTCACAGCGTTTTGCTGAGCTCC   | [3837] |
| Noctilio     | GGAAATCCCTCTGCCAGTACAGTTTCAATTCACAGCGTTTTGCTGAGCTCC  | [3825] |
| Natalus      | AGAATCCCTCTGCCAGTATAGTTTCAATTCACAGCGTTTTGCTGAGCTCC   | [3822] |
| Rhinolophus  | AGAATTTCTCTGCCAATACAGTTTCAATTCACAGCGTTTTGCCGAGCTCC   | [3858] |
| Rousettus    | GGAAATCCCTCTGCCAATATAGTTTCAATTCGAGCGTTTTGCTGAGCTCC   | [3831] |
| NycterisT    | AAAATCCCTCTGCCAGTATAGTTTCAATTCACAGCGTTTTGCTGAGCTCC   | [3798] |
| Nyctimene    | AGAATCTCTCTGCCAATATAGTTTCAATTCGAGCGTTTTGCCGAGCTCC    | [3846] |
| Mole         | AGAATCCCTCTGCCAGTATAGTTTCAATTCACAGCGTTTTGCTGAACTCC   | [3858] |
| Horse        | AGAAATCCCTCTGCCAGTATAGTTTCAATTCACAGCGTTTTGCTGAGCTCC  | [3852] |
| Desmodus     | AGAGTCTCTCTGCCAGTACAGTTTCAATTCACAGCGTTTTGCTGAGCTCC   | [3798] |
| Rhinopoma    | ???????????????????????????????????????????????????? | [3870] |
| Emballonura  | AGAATCCCTCTGCCAGTATAGTTTAAATTCACAGCGTTTTGCTGAGCTCC   | [3810] |
| Cow          | GGAAATCCCTCTGCCAGTATAGCTTCAATTCACAACGCTTTGCTGAGCTCC  | [3846] |
| Pangolin     | AGAATCCCTCTGCCAGTATAGTTTCAATTCACAGCGTTTTGCTGAGCTCC   | [3852] |
| Whale        | AGAATCCCTCTGCCAGTATAGTTTCAATTCACAGCGTTTTGCTGAGCTCC   | [3846] |

[ 3910 3920 3930 3940 3950 ]  
[ . . . . . ]

|              |                                                      |        |
|--------------|------------------------------------------------------|--------|
| Tonatia      | TCTCTACCAAGTTCAAGTATAGATATGAGGGCAAAATTACCAATTACTTT   | [3839] |
| Myotis       | TCTCGACCAAGTTCAAGTATAGATACGAGGGCAAGATCACCAATTATTTT   | [3878] |
| Tadarida     | TCTCCACCAAGTTCAAGTATAGATACGAGGGCAAAATCACCAATTATTTT   | [3866] |
| Taphozous    | ???????????????????????????????????????????????????? | [3872] |
| Megaderma    | TCTCTACCAAGTTCAAGTACAGATATGAGGGCAAAATCACCAATTATTTT   | [3881] |
| Cynopterus   | TCTCTACCAAGTTCAAGTATAGATATGAGGGCAAAATCACCGGTTATTTT   | [3893] |
| Pteropus     | TCTCTACCAAGTTCAAGTATAGATATGAGGGCAAAATCACCAATTATTTT   | [3878] |
| Hipposideros | TCTCTACCAAGTTCAAGTACAGATATGAGGGTAA?ATCACC????????    | [3917] |
| Cat          | TCTCTACCAAGTTCAAGTATCGATATGAGGGCAAAATCACCAATTACTTT   | [3920] |
| Human        | TTTCTACGAAGTTCAAGTATAGGTATGAGGGAAAAATCACCAATTATTTT   | [3914] |
| Mouse        | TCTCCACCAAGTTCAAAATATAGATACGAGGGCAAAATCACCAATTACTTT  | [3812] |
| Flyinglemur  | TCTCTACCAAGTTCAAGTATAGATATGAGGGCAAAATCACCAATTATTTT   | [3923] |
| NycterisG    | TGCTACCAAGTTCAAGTATAGATACGAGGGTAAAAATCACCAATTATTTT   | [3824] |
| Antrozous    | TCTCCACCAAGTTCAAGTATAGATACGAGGGCAAGATCACCAATTATTTT   | [3869] |
| Rhogeessa    | TCTCCACCAAGTTCAAGTATAGATATGAGGGCAAGATCACCAATTATTTT   | [3887] |
| Noctilio     | TCTCTACCAAGTTCAAGTATAGATACGAGGGCAAAATCACCAATT????    | [3875] |
| Natalus      | TCTCYACCAAAATTCAGTACAGGTACGAGGGC????????????????     | [3872] |
| Rhinolophus  | TCTCCACCAAGTTCAAGTACAGATATGAGGGCAAAATCACCAATTATTTT   | [3908] |
| Rousettus    | TCTCTACCAAGTTCAAGTATAGATATGAGGGCAAAATCACCAATTATTTT   | [3881] |
| NycterisT    | TGCTACCAAGTTCAAGTATAGATACGAGGGTAAAAATCACCAATTATTTT   | [3848] |
| Nyctimene    | TCTCTACCAAGTTCAAGTATAGATATGAGGGCAAAATCACCAATTATTTT   | [3896] |
| Mole         | TCTCTACCAAGTTCAAGTATAGATATGAGGGCAAAATCACCAATTATTTT   | [3908] |
| Horse        | TCTCTACCAAGTTCAAGTATCGGTATGAGGGCAAAAT????????????    | [3902] |
| Desmodus     | TCTCTACCAAGTTCAAGTATAGATATGAAGGCAAAATCACCAATTATTTT   | [3848] |
| Rhinopoma    | ???????????????????????????????????????????????????? | [3920] |
| Emballonura  | TCTCTACCAAGTTCAAGTATAGGTACGAGGGCAAAATCACCAATTATTTT   | [3860] |
| Cow          | TCTCCACCAAGTTCAAGTATAGATATGAAGGCAAAATCACCAATTATTTT   | [3896] |
| Pangolin     | TCTCTACCAAGTTCAAGTACAGATATGAGGGCAAAATCACCAATTATTTT   | [3902] |
| Whale        | TCTCCACCAAGTTCAAGTATAGATACGAGGGCAAAATCACCAATTATTTT   | [3896] |

[ 3960 3970 3980 3990 4000 ]  
[ . . . . . ]

|              |                                                    |        |
|--------------|----------------------------------------------------|--------|
| Tonatia      | CACAAAACCTGCCTCCTCTTCGCTACCCGGCCACTTGCACATTCAAAGC  | [3889] |
| Myotis       | CACAAAACCTTCCTCCTCTTCGCTACCCAGCCACTTGCACATTCAAAGA  | [3928] |
| Tadarida     | CACAAAAC?????CCTCTTCGCTACCCAGCCACTTGCACATTCAAAGGA  | [3916] |
| Taphozous    | ?????????CTTCTCCT?TTCGCTACCCAGCCACTTGCATGTTCAAAGAA | [3922] |
| Megaderma    | CACAAA?CTTCTCCTCTTCGCTACCCAGCCACTTGCATATTCAAAGGC   | [3931] |
| Cynopterus   | CAAAAGGC?????CCTCTTCGCTACCCAGCCACTTGCATTTTCAAAGGC  | [3943] |
| Pteropus     | CACAAAACCTTCCTCCTCTTCGCTACCCAGCCACTTGCATGTTCAAAGGC | [3928] |
| Hipposideros | ?????????CTCCTCCTCTACGCTACCCAGCCACTTGCACATTCAAAGGC | [3967] |

|             |                                                                  |        |
|-------------|------------------------------------------------------------------|--------|
| Cat         | CACAAAACCTTCCTCCTCTTCGTTACCCAGCCACTTGCATCTTCAGAGCC               | [3970] |
| Human       | CACAAAACCTCCCTCCTCTTCGCTACCCAGCCACTTGCACATTCAAAGGC               | [3964] |
| Mouse       | CACAAAACCTCCACCTCTTCGTTATCCAGTACTTGTCTCATACAAAGGC                | [3862] |
| Flyinglemur | CACAAAAC?????CCTCTTCGCTACCCAGCCACTTGTACATTCAAAAGC                | [3973] |
| NycterisG   | CACAAAAC?????CCTCTTCGCTACCCAGCCACTTGCATTCAAAGGC                  | [3874] |
| Antrozous   | CCCAAAAACCTTCCTCCTCTTCGCTACCCAGCCACTTGCATTCAAAGGA                | [3919] |
| Rhogeessa   | CACAAAAC?????CCTCCTCTTCGCTACCCAGCCACTTGCATTCAAAGGA               | [3937] |
| Noctilio    | ???????CCTCCTCCTCTTCGCTACCCAGCCACTTGCATTCGAAAGGC                 | [3925] |
| Natalus     | ???????CCTCCTCCTCTTCGCTACCCAGCCACTTGCACATTCAAAGAA                | [3922] |
| Rhinolophus | CACA????????????????????????????????????CCTTGCACATTCAAAGGG       | [3958] |
| Rousettus   | CACAAAAC????????????????????????????????????CCTTGCATTCAAAGGC     | [3931] |
| NycterisT   | CACAAAAC????????????????????????????????????CCACTTGCACATTCAAAGGC | [3898] |
| Nyctimene   | CACAAAAC?????????????????????????????????????TGTTCAAAGGC         | [3946] |
| Mole        | CACAAAAC????CCTCCTCTCCGCTACCCAGCCACTTGCACAATCAAAGGC              | [3958] |
| Horse       | ?????????TCTCCTCTCCGCTACCCAGCCACTTGTCTCCTTCAAAGGC                | [3952] |
| Desmodus    | CACAAAAC????CCTCCTCTTCGCTACCCAGCCACTTGCACATTCAAAGGC              | [3898] |
| Rhinopoma   | ?????????CTCCTCCTCTTCGCTACCCAGCCACTTGCATTCAAAGGC                 | [3970] |
| Emballonura | CACAAAAC?????????????????????????????????????????????GGC         | [3910] |
| Cow         | CACAAAACCTCCCTCCTCTTCGATACCCGGCCACTTGCACATTCAGCGGC               | [3946] |
| Pangolin    | CACAAAACCTCCCTCCTCTTCGCTACCCAGCCACTTGCACATTCAAAGGC               | [3952] |
| Whale       | CACAAAACCTCC?TCTCCTTCGTTACCCAGCCACTTGCACATTCAAAGGC               | [3946] |

|   |      |      |      |      |       |
|---|------|------|------|------|-------|
| [ | 4010 | 4020 | 4030 | 4040 | 4050] |
| [ | .    | .    | .    | .    | .]    |

|              |                                                     |        |
|--------------|-----------------------------------------------------|--------|
| Tonatia      | AGTGTGGAGTCTGAAAAGCAACAGTACATTATCCACGGGGGAAAAACACC  | [3939] |
| Myotis       | AGGCTAGAGTTTGAAAGGCACCAATACATTATCCACGGAGGGAAAAACACC | [3978] |
| Tadarida     | GGCTTAGAGTCTGAAAAGCAACAATACATTATCCATGGAGGGAAAAACACC | [3966] |
| Taphozous    | AGCTTAGAGTCTGAAAAGTGTGAGTACATTATCCATGGAGGGAAAAACACC | [3972] |
| Megaderma    | AGCCTAGAGTCTGAAAATATCAATACATTATCCATGGAGGGAAAAACACC  | [3981] |
| Cynopterus   | AGCGGAGAGTCTGAAAAGTATCAATACATTATCCATGGAGGGAAAAACACC | [3993] |
| Pteropus     | AGCGTAGAGCCTGAAAAGTATCAATACATTATCCATGGAGGGAAAAACACC | [3978] |
| Hipposideros | AGCCTAGAGTCTGACAAGTATCAATACATTATCCATGGAGGGAAAAACACC | [4017] |
| Cat          | AGCTTAGAGTCTGAAAAGCATCAATATATCATCCATGGAGGGAAAAACACC | [4020] |
| Human        | AGCTTAGAGTCTGAAAAGCATCAATACATCATCCATGGAGGGAAAAACACC | [4014] |
| Mouse        | AGCATAGACTCTGACAAGCATCAATATATCATTCACGGAGGGAAAAACACC | [3912] |
| Flyinglemur  | AGCTTAGAGTCTGATCAGCAGCATATATCATCCATGGAGGGAAAAACACC  | [4023] |
| NycterisG    | AGCTTAGAATCAGAAAAGCATCAATACATTATCCATGGAGGGAAAAACACC | [3924] |
| Antrozous    | GGCTTAGAGTCTGAAAGGCAGCAATACATTATTCATGGAGGGAAAAACACC | [3969] |
| Rhogeessa    | GGCTTAGAGTCTGAAAGGCAGCAATACATTATCCACGGAGGGAAAAACACC | [3987] |
| Noctilio     | AGCTTAGAGTCTGAAAAGCAACAATACATTATCCATGGGGGGAAGACCCC  | [3975] |
| Natalus      | GGCTTAGAGTGTGAAAAGCAACAATACATTATCCATGGAGGGAAAAACACC | [3972] |
| Rhinolophus  | AGCCTAGAGTCTGAAAAGTATCAATACATCATCCATGGAGGGAAAAACACC | [4008] |
| Rousettus    | AGCGCAGAATCTGAAAAGTATCAATACATTATCCATGGAGGGAAAAACACC | [3981] |
| NycterisT    | AGCTTAGAATCTGAAAAGCATCAATACATTATCCATGGAGGGAAAAACACC | [3948] |
| Nyctimene    | AGCGTAGAGTCTGAAAAGTATCAATTCATTATCCATGGAGGGAAAAACACC | [3996] |
| Mole         | AGCTTAGAGTCTGAAAAGCATCAATACGTTATCCATGGTGGGAAAAACACC | [4008] |
| Horse        | AGCTCAGAGTCTGAAAAGCATCAATACATCATCCACGGAGGGAAAAACACC | [4002] |
| Desmodus     | AGTTCGGAGCCTGAAAAGCAACAATACATTATCCATGGGGGAAAAACACC  | [3948] |
| Rhinopoma    | AGCCTAGAGTCTGAAAAGTATCAATACGTTATCCATGGAGGGAAAAACACC | [4020] |
| Emballonura  | AGCTTAGAGTCTGAAAAGTATCAATACATTATCCATGGAGGGAAAAACACC | [3960] |
| Cow          | AACTTGGAGTCTGAAAAGCATCAGTACATCATCCATGGAGGGAAAAACACC | [3996] |
| Pangolin     | AGCTTAGAGTCTGAAAAGCATCAGTACATCATCCACGGAGGGAAAAACACC | [4002] |
| Whale        | ACC?TAGAGTCTGAAAAGCATCAGTACATCATCCATGGAGGGAAAAACACC | [3996] |

|   |      |      |      |      |       |
|---|------|------|------|------|-------|
| [ | 4060 | 4070 | 4080 | 4090 | 4100] |
| [ | .    | .    | .    | .    | .]    |

|              |                                                    |        |
|--------------|----------------------------------------------------|--------|
| Tonatia      | GAACAATGAGCTTTCGATAAGATTTATGTCATGCTGTTGTGTGCAAGA   | [3989] |
| Myotis       | AAACAATGAGCTTTCAGATAAGATGTATGTTATGTCGTTGTGTGCAAGA  | [4028] |
| Tadarida     | CAACAATGAGCTTTCAGATAAGATTTATGTCATGCTGTTGTGTGCAAGA  | [4016] |
| Taphozous    | GAACAATGAGCTTTCAGATAAGATTTATGTCATGCTGTTGTGTGCAAGA  | [4022] |
| Megaderma    | AAACAATGAGCTTTCAGATAAAATTTATGTCATGCTGTTGTGTGCAAGA  | [4031] |
| Cynopterus   | AAACAATGAGCTTTCAGATAAAATTTATGTCATGCTGTTGTGTGTAAGA  | [4043] |
| Pteropus     | AAACAATGAGCTTTCAAATAAAATTTATGTCATGCTATTGTGTGTAAGA  | [4028] |
| Hipposideros | AAACAATGAGCTTTCAGATAAGATTTATGTCATGCTGTCGTTGTGCAAGA | [4067] |
| Cat          | AAATAATGAGCTTTCAGATAAGATTTATGTCATGCTGTTGTGTGCAAGA  | [4070] |
| Human        | AAACAATGAGCTTTCAGATAAGATTTATGTCATGCTATTGTTGTGCAAGA | [4064] |
| Mouse        | AAACAATGAGCTTTCGATAAGATTTATATCATGCTGTCGCTTGTGCAAGA | [3962] |
| Flyinglemur  | AAACAATGAGCTTTCAGATAAGATTTATGTCATGCTGTTGTGTGCAAGA  | [4073] |
| NycterisG    | AAATAATGAGCTTTCAGATAAAATTTATGTCATGCTGTTGTGTGCAAGA  | [3974] |
| Antrozous    | AAACAATGAGCTTTCAGATAAGATGTATGTTATGTCGTTGTGTGCAAGA  | [4019] |
| Rhogeessa    | AAACAATGAGCTTTCAGATAAGATGTATGTTATGTCGTTGTGTGCAAGA  | [4037] |

|             |                                                     |        |
|-------------|-----------------------------------------------------|--------|
| Noctilio    | AAACAATGAGCTTTCAGATAAGATTTACGTCATGTCTGTTGTATGCAAAA  | [4025] |
| Natalus     | AAACAATGAACCTTTCAGATAAGATTTATGTCATATCTGTTGTGTGCAAGA | [4022] |
| Rhinolophus | AAACAATGAGCTTTCAGATAAGATTTATGTCATGTCTGTTATGTGCAAGA  | [4058] |
| Rousettus   | AAACAATGAGCTTTCAGATAAAATTTATGTCATATCTGTTGTGTCTAAGA  | [4031] |
| NycterisT   | AAATAATGAGCTTTCAGATAAAATGTATGTGATGTCTGTTGTGTGCAAGA  | [3998] |
| Nyctimene   | AAACAATGAGCTTTCAGATAAAATTTATGTCATGTCTGTTGTGTGTAAGA  | [4046] |
| Mole        | AAACAATGAGCTTTCAGATAAGATCTATGTCATGTCTGTTGTTGCAAGA   | [4058] |
| Horse       | AAACAATGAGCTTTCGGATAAGATTTATGTCATGTCTGTTCTTTGCAAGA  | [4052] |
| Desmodus    | AAACAATGAGCTTTCGATAAGATCTATGTCATGTCTGTTGTGTGCAAGA   | [3998] |
| Rhinopoma   | AAACAATGAGCTTTCAGATAAGATATATGTCATGTCTGTTGTGTGCAAGA  | [4070] |
| Emballonura | AAACAATGAGCTATCAGATAAGATTTATGTCATGTCTGTTGTCATGCAAGA | [4010] |
| Cow         | AAACAATGAGCTTTCAGATAAGATTTATGTGATGTCTGTTGTTTCCAAGA  | [4046] |
| Pangolin    | AAACAATGAACCTTTCAGATAAGATTTATGTCATGTCTGTTGTTTGAAGA  | [4052] |
| Whale       | AAACAATGAGCTTTCAGATAAGATTTATATCATGTCTGTTTTTGAAGA    | [4046] |

[ 4110 4120 4130 4140 4150 ]  
[ . . . . . ]

|              |                                                    |        |
|--------------|----------------------------------------------------|--------|
| Tonatia      | ACAACAAGAAAGTTACTTTTTGCTGTACTGAGAAAGACTTGGTGGGGGAC | [4039] |
| Myotis       | ACAACAAAAAAGTTACTTTTCGCTGCACTGAGAAAGACTTGGTAGGAGAT | [4078] |
| Tadarida     | ACAACAAAAAAGTTACTTTTCGCTGCACTGAGAAAGACTTGGTAGGAGAT | [4066] |
| Taphozous    | ACAACAAAAAAGTTACTTTTCAATGCACTGAGAAAGACTTGGTAGGAGAT | [4072] |
| Megaderma    | ACAACAAAAAAGTTACTTTTCGCTGCACTGAGAAAGACTTGGTAGGAGAT | [4081] |
| Cynopterus   | ACAACAAAAAAGTTACTTTTCGCTGCACTGAGAAAGACTTGGTAGGAGAT | [4093] |
| Pteropus     | CCAACAAAAAAGTTACTTTTCGCTGCACTGAGAAAGACTTGGTAGGAGAT | [4078] |
| Hipposideros | ACAACAAAAAAGTTACTTTTCGCTGCACTGAGAAAGACTTGGTAGGAGAT | [4117] |
| Cat          | ACAACAAAAAAGTTACTTTTTGCTGCACGGAGAAAGACTTGGTAGGAGAT | [4120] |
| Human        | ACAACAAAAAAGTTACTTTTCGCTGCACAGAGAAAGACTTGGTAGGAGAT | [4114] |
| Mouse        | ATAACAAAAAAGTTACTTTCCGTTGCACAGAGAAAGACTTAGTAGGAGAT | [4012] |
| Flyinglemur  | ACAACAAAAAAGTTACTTTTCAGTGCACGGAGAAAGACTTGGTAGGAGAC | [4123] |
| NycterisG    | ACAACAAAAAAGTTACTTTTCGCTGCACTGAGAAAGACTTGGTAGGAGAT | [4024] |
| Antrozous    | ACAACAAAAAAGTTACTTTTCGCTGCACTGAGAAAGACTTGGTAGGAGAT | [4069] |
| Rhogeessa    | ACAACAAAAAAGTTACTTTTCGCTGCACTGAGAAAGACTTGGTAGGAGAT | [4087] |
| Noctilio     | ACAACAAAAAAGTTACTTTTTGCTGCACTGAGAAAGACTTGGTAGGAGAT | [4075] |
| Natalus      | ACAACAAAAAAGTTACTTTTCGCTGCACTGAGAAAGACTTGGTAGGAGAT | [4072] |
| Rhinolophus  | ACAACAAAAAAGTTACTTTTCGCTGCACTGAGAAAGACTTGGTAGGAGAT | [4108] |
| Rousettus    | ACAACAAAAAAGTTACTTTTCGCTGCACTGAGAAAGACTTGGTAGGAGAT | [4081] |
| NycterisT    | ACAACAAAAAAGTTACTTTTCGCTGCACTGAGAAAGACTTGGTAGGAGAT | [4048] |
| Nyctimene    | ACAACAAAAAAGTTACTTTTCGCTGCACTGAGAAAGACTTGGTAGGAGAT | [4096] |
| Mole         | GCAACAAAAAAGTTACTTTTCGTTGCACAGAGAAAGACTTGGTAGGAGAT | [4108] |
| Horse        | ACAACAAAAAAGTTACTTTTCGCTGCACTGAGAAAGACTTGGTAGGAGAT | [4102] |
| Desmodus     | ACAACAAGAAAGTTACTTTTTGCTGTACTGAGAAAGACTTGGTGGGAGAC | [4048] |
| Rhinopoma    | ACAACAAAAAAGTTACTTTTCGCTGCACTGAGAAAGACTTGGTAGGAGAT | [4120] |
| Emballonura  | ACAACAAAAAAGTTACTTTTCAGTGCACAGAGAAAGACTTGGTAGGAGAT | [4060] |
| Cow          | ACAACAAAAAAGTTACTTTTCGCTGCACAGAGAAAGACTTGGTAGGAGAC | [4096] |
| Pangolin     | ACAACAAAAAAGTTACTTTTCGTTGCATAGAGAAAGACTTGGTAGGAGAT | [4102] |
| Whale        | ACAACAAAAAAGTTACTTTTCGCTGCACAGAGAAAGACTTGGTAGGAGAT | [4096] |

[ 4160 4170 4180 4190 4200 ]  
[ . . . . . ]

|              |                                                       |        |
|--------------|-------------------------------------------------------|--------|
| Tonatia      | ATCCCCGAAGCCAGATATGGTCATACCATTGATGTGGTGCACAGTCGAGG    | [4089] |
| Myotis       | GTTCCCTGAAGCCAGATATGGTCATTCCATTGATGTGGTATATAGTCGAGG   | [4128] |
| Tadarida     | GTTCCCTGAAGCCAGATATGGTCATTCCATTGATGTGGTCTACAGTCGAGG   | [4116] |
| Taphozous    | GTTCCAGAAAGCTAGATATGGTCATTCCATTGATGTGGTGTACAGTCGAGG   | [4122] |
| Megaderma    | GTTCCGGAAGCCAGATACGGTCATTCCATTGATGTGGTGTATAGTCGAGG    | [4131] |
| Cynopterus   | GTCCCTGAAGCCAGATATGGCCATTCCATCGACGTGGTGTATAGCCGGGG    | [4143] |
| Pteropus     | GTCCCTGAAGCCAGATATGGTCATTCCATCGACGTGGTGTATAGCCGGGG    | [4128] |
| Hipposideros | GTCCCGGAAGCCAGATATGGTCATTCCCTTGACGTGGTATATAGTCGAGG    | [4167] |
| Cat          | GTCCCTGAAGCCAGATATGGTCATTCCATTGATGTGGTGTATAGTCGAGG    | [4170] |
| Human        | GTTCCCTGAAGCCAGATATGGTCATTCCATTAATGTGGTGTACAGCCGAGG   | [4164] |
| Mouse        | GTCCCTGAACCCAGATACGGCCATTCCATTGACGTGGTGTATAGTCGAGG    | [4062] |
| Flyinglemur  | GTTCCCTGAAGCCAGATATGGTCACTCCATTGATGTGGTGTATAGTCGAGG   | [4173] |
| NycterisG    | GTTCCCTGAAGCCAGATATGGTCATTCCATCGATGTGGTGTACAGCCGAGG   | [4074] |
| Antrozous    | GTTCCCTGTAGCCAGATATGGTCATTCCATTGACATGGTATATAGTCGAGG   | [4119] |
| Rhogeessa    | GTTCCCTGTAGCCAGATATGGTCATTCCATTGACATGATATATAGTCGAGG   | [4137] |
| Noctilio     | GTCCCTGAAGCCAGATATGGTCATTCCATTGATGTGGTGTACAGTCGAGG    | [4125] |
| Natalus      | GTTCCCTGAAGCCAGATATGGTCATTCCATTGATGTGGTGTATACAGTCGAGG | [4122] |
| Rhinolophus  | GTCCCGGAAGCCAGATATGGTCATTCCATTGATGTGGTGTACAGTCGAGG    | [4158] |
| Rousettus    | GTTCCCGAAGCCAGATATGGTCATTCCATCGACGTGGTGTATAGCCGGGG    | [4131] |
| NycterisT    | GTTCCCTGAAGCCAGATATGGTCATTCCATTGATGTGGTGTACAGTCGAGG   | [4098] |
| Nyctimene    | GTCCCTGAAGCCAGATATGGTCATTCCATTGACGTGGTGTATAGCCGGGG    | [4146] |
| Mole         | GTTCCCTGAAGCCAGATATGGTCATTCCATTGATGTGGTGTACAGTCGAGG   | [4158] |

|             |                                                    |        |
|-------------|----------------------------------------------------|--------|
| Horse       | GTTCTGAAGCCAGATATGGTCATTCCATTGATGTGGTGTATAGTCGAGG  | [4152] |
| Desmodus    | ATCCCCGAAGCCAGATACGGCCATACCATTGATGTGGTGTACAGTCGAGG | [4098] |
| Rhinopoma   | GTTCCGGAAGCCAGATATGGTCATTCCATTGATGTGGTGTATAGTCGAGG | [4170] |
| Emballonura | GTTCTGAAGCTAGATACGGTCATTCCATTGATATGGTGTACAGTCGAGG  | [4110] |
| Cow         | ATTCTGAAGCCAGATATGGTCATTCCATTGATGTGGTGTATAGTCGGGG  | [4146] |
| Pangolin    | GTTCTGAAGCCAGATATGGTCATACCATTGATGTGGTGTATAGTCGAGG  | [4152] |
| Whale       | GTTCTGAAGCCAGGTATGGTCATTCCATTGATGTGGTGTATAGTCGCGG  | [4146] |

[ 4210 4220 4230 4240 4250 ]  
[ . . . . . ]

|              |                                                     |        |
|--------------|-----------------------------------------------------|--------|
| Tonatia      | GAAGAGCATGGGTGTTGTCTTTCGGAGGGCGATCGTACATACCTTCTGCCC | [4139] |
| Myotis       | GAAGAGCATGGGTGTTGTCTTTCGGAGGGCGGCATACATACCTTCTGCCC  | [4178] |
| Tadarida     | GAAAAGCATGGGTGTTGTCTTTCGGAGGACGATCATAACACCTCTGCCC   | [4166] |
| Taphozous    | GAAGAGTATGGGTGTTATCTTTGGAGGACGATCATAACACCTCTGCCC    | [4172] |
| Megaderma    | GAAGAGTATGGGTGTTCTCTTTCGGTGGGCGAGCATAACACCTCTGCCC   | [4181] |
| Cynopterus   | AAAGAGTGTGGGTGTTCTCTTTCGGAGGACGAGCATAACACCTCTGCCC   | [4193] |
| Pteropus     | AAAGAGTGTGGGTGTTCTCTTTCGGAGGACGAGCATAACACCTCTGCTC   | [4178] |
| Hipposideros | GAAGAGTATGGGTGTTCTCTTTCGGTGGACGAGCATAACACCTTCTGCCC  | [4217] |
| Cat          | GAGGATATGGGTGTTCTCTTTCGGAGGACGGTCATACATGCCTTCTGCCC  | [4220] |
| Human        | GAAAAGTATGGGTGTTCTCTTTCGGAGGACGGTCATACATGCCTTCTACCC | [4214] |
| Mouse        | GAAAAGCATGGGTGTTCTCTTTCGGAGGACGGTCATACATGCCTTCTACCC | [4112] |
| Flyinglemur  | GAAAAGTATGGGTGTTCTCTTTCGGAGGACGGTCTTACATGCCTTCTACCC | [4223] |
| NycterisG    | GAAGAGCATGGGTGTTGTCTTTCGGAGGGCGATCATAACACCTTCCGCCC  | [4124] |
| Antrozous    | AAAGAGCATGGGTGTGATCTTTCGGAGGGCGGCATATGTGCCTTCTGTCC  | [4169] |
| Rhogeessa    | GAAGAGCATGGGTGTTGTCTTTCGGAGGGCGGCATACATATCTTCTGCCC  | [4187] |
| Noctilio     | CAAGAGCATGGGGTGTCTTTCGGAGGGCGATCATAACACCTTCTGCCC    | [4175] |
| Natalus      | AAAGAGCATGGGCGTGTCTTTCGGAGGACGATCATAACACCTTCTGCCC   | [4172] |
| Rhinolophus  | GAAGAGTATGGGTGTTCTCTTTCGGTGGACGAGCATAACACCTCTGCCC   | [4208] |
| Rousettus    | AAAGAGTGTGGGTGTTCTCTTTCGGAGGACGAGCATAACACCTCTGCCC   | [4181] |
| NycterisT    | GAAGAGCATGGGTGTTGTCTTTCGGAGGACGATCATAACACCTTCTGCCC  | [4148] |
| Nyctimene    | AAAGAGTGTGGGTGTTCTCTTTCGGAGGACGAGCATAACACCTCTGCCC   | [4196] |
| Mole         | AAAAGTATTGGTGTCTCTTTCGGAGGACGGTCATACATACCTTCTGCCC   | [4208] |
| Horse        | GAAAGTATAGGTGTTCTCTTTCGGAGGACGGTCCTACATCCCCTCCACCC  | [4202] |
| Desmodus     | GAAGAGCATGGGTGTTGTCTTTCGGAGGGCGATCATAACACCTTCTGCCC  | [4148] |
| Rhinopoma    | AAAGAGCATGGGTGTTATCTTTCGGTGGACGAGCATAACACCTTCTGCCC  | [4220] |
| Emballonura  | AAAGAGCATGGGTGTTATCTTTCGGAGGACGATCATAACACCTCTTCCC   | [4160] |
| Cow          | GAAAAGTATGGGTGTTCTCTTTCGGAGGACGGTCATACATACCTTCTGCCC | [4196] |
| Pangolin     | GAAAAGCATGGGTGTTCTCTTTCGGAGGACGGTCATACATGCCTTCTGCCC | [4202] |
| Whale        | AAAAGTGTGGGTGTTCTCTTTCGGAGGACGGTCATACATACCTTCCGCCC  | [4196] |

[ 4260 4270 4280 4290 4300 ]  
[ . . . . . ]

|              |                                                     |        |
|--------------|-----------------------------------------------------|--------|
| Tonatia      | AGAGAACCACGGAAGTGAATAGTGTGGCTGACTGCCTGCCCCACGTT     | [4189] |
| Myotis       | AGAGAACCACAGAAAAATGGAATACTGTAGCAGACTGCCTGCCCCATGTT  | [4228] |
| Tadarida     | AAAGAATCACAGAAAAATGGAATAGTGTAGCTGACTGCCTGCCCCATGTT  | [4216] |
| Taphozous    | AGAGAACCACAGAAAAATGGAATAGTGTAGCTGACTGCCTGCCCCACGTT  | [4222] |
| Megaderma    | AAAGAACCACAGAAAAATGGAATAGTGTAGCTGACTGTCAGCCATGTT    | [4231] |
| Cynopterus   | AGAGAACCACAGAAAAATGGAACAGCGTGGCTGACTGCCTGCCCCATGTT  | [4243] |
| Pteropus     | AAAGAACCACAGAAAAATGGAACAGCGTAGCTGACTGCCTGCCCCATGTT  | [4228] |
| Hipposideros | AAAGAATCACAGAAAAATGGAACAGTGTAGCTGACTGCCTGCCCCATAT   | [4267] |
| Cat          | AAAGAATCACAGAAAAATGGAATAGTGTAGCTGACTGTCGCCCCATGTT   | [4270] |
| Human        | ACAGAACCACAGAAAAATGGAATAGTGTAGCTGACTGCCTGCCCCATGTT  | [4264] |
| Mouse        | AGAGAACCACAGAAAAATGGAATAGTGTAGCTGACTGCCTACCCCCATGTT | [4162] |
| Flyinglemur  | AAAGAACCACAGAAAAATGGAATAGTGTAGCTGACTGCCTGCCCCATGTT  | [4273] |
| NycterisG    | AAAGAACCACAGAAAAATGGAATAGTGTAGCTGACTGCCTGCCCCATGTT  | [4174] |
| Antrozous    | AGAGAACCACAGAAAAATGGAATACTGTAGCAGACTGCCTGCCCCATGTT  | [4219] |
| Rhogeessa    | AGAGAACCACGAAAAATGGAATACTGTAGCAGACTGCCTGCCCCATGTT   | [4237] |
| Noctilio     | AAAGAACCACAGAAAAATGGAATAGTGTGCTGACTGCCTGCCCCACATT   | [4225] |
| Natalus      | AAAGAACCACAGAAAAATGGAATAGTGTAGCTGACTGCCTGCCCCATGTT  | [4222] |
| Rhinolophus  | AAAGAACCACAGAAAAATGGAATAGTGTAGCTGACTGCCTGCCCCATATA  | [4258] |
| Rousettus    | AAAGAACCACAGAAAAATGGAACAGCGTAGCTGACTGCCTGCCCCATGTT  | [4231] |
| NycterisT    | AAAGAACCACAGAAAAATGGAATAGTGTAGCTGACTGCCTGCCCCATGTT  | [4198] |
| Nyctimene    | AAAGAATCACAGAAAAATGGAACAGTGTAGCTGACTGCCTACCCCCATGTT | [4246] |
| Mole         | AGAGAACCACAGAAAAATGGAATAGTGTAGCTGACTGCCTGCCCCATGTT  | [4258] |
| Horse        | AAAGAACCACAGAAAAATGGAATAGCTGACTGACTGCCTGCCCCATGTT   | [4252] |
| Desmodus     | AAAGAACCACGGAAGTGAACAGTGTAGCTGACTGCCTGCCCCACATT     | [4198] |
| Rhinopoma    | AAAGAACCACAGAAAAATGGAATAGTGTAGCTGACTGCCTGCCCCATGTT  | [4270] |
| Emballonura  | AAAGAACCACAGAAAAATGGAATAGTGTACTGACTGCCTGCCCCACGTT   | [4210] |
| Cow          | AAAGAACCACAGAAAAATGGAACAGTGTAGCTGACTGCCTGCCCCATGTC  | [4246] |
| Pangolin     | AAAGAACCACAGAAAAATGGAATAGCTGACTGACTGCCTGCCCCATGTT   | [4252] |
| Whale        | AAAGAACCACAGAAAAATGGAACAGTGTAGCTGACTGCCTGCCCCATGTT  | [4246] |

|              |                                                    |      |      |      |       |        |
|--------------|----------------------------------------------------|------|------|------|-------|--------|
| [            | 4310                                               | 4320 | 4330 | 4340 | 4350] |        |
| [            | .                                                  | .    | .    | .    | .     | ]      |
| Tonatia      | TTCTTGGTGGATTTTGAATTTGGGTGCTCTACATCATACTTCTCCAGA   |      |      |      |       | [4239] |
| Myotis       | TTCTTGGTGGATTTTGAATTTGGGTGCTCTACATCATACTTCTCCAGA   |      |      |      |       | [4278] |
| Tadarida     | TTCTTGGTGGATTTTGAATTTGGGTGCTCTACATCATACTTCTCCAGA   |      |      |      |       | [4266] |
| Taphozous    | TTCTTGGTGGATTTTGAATTTGGGTGCTCTACATCATACTTCTCCAGA   |      |      |      |       | [4272] |
| Megaderma    | TTCTTGGTGGATTTTGAATTTGGGTGCTCTACATCATACTTCTCCTGA   |      |      |      |       | [4281] |
| Cynopterus   | TTCTTGGTGGATTTTGAATTTGGGTGCTCTACGGCATACTTCTCCAGA   |      |      |      |       | [4293] |
| Pteropus     | TTCTTGGTGGATTTTGAATTTGGGTGCTCTACGGCATACTTCTCCAGA   |      |      |      |       | [4278] |
| Hipposideros | TTCTTGGTGGATTTTGAATTTGGGTGCTCTACATCATACTTCTCCAGA   |      |      |      |       | [4317] |
| Cat          | TTCTTGGTAGATTTTGAATTTGGGTGCTCTACGTACATACTTCTGCCAGA |      |      |      |       | [4320] |
| Human        | TTCTTGGTGGATTTTGAATTTGGGTGCTCTACATCATACTTCTCCAGA   |      |      |      |       | [4314] |
| Mouse        | TTCTTGTAGATTTTGAATTTGGGTGCTCTACATCATACTTCTCCAGA    |      |      |      |       | [4212] |
| Flyinglemur  | TTCTTGGTGGATTTTGAATTTGGGTGCTCTACATCATACTTCTCCAGA   |      |      |      |       | [4323] |
| NycterisG    | TTCTTGGTGGATTTTGAATTTGGGTGCTCTACATCATACTTCTCCAGA   |      |      |      |       | [4224] |
| Antrozous    | TTCTTGGTGGATTTTGAATTTGGGTGCTCTACATCATACTTCTCCAGA   |      |      |      |       | [4269] |
| Rhogeessa    | TTCTTGGTGGATTTTGAATTTGGGTGCTCTACAGCATACTTCTCCAGA   |      |      |      |       | [4287] |
| Noctilio     | TTCTTGGTGGATTTTGAATTTGGGTGCTCTACATCATACTTCTCCAGA   |      |      |      |       | [4275] |
| Natalus      | TTCTTGGTGGATTTTGAATTTGGGTGCTCTACGTACATACTTCTCCAGA  |      |      |      |       | [4272] |
| Rhinolophus  | TTCTTGGTGGATTTTGAATTTGGGTGCTCTACATCATACTTCTCCAGA   |      |      |      |       | [4308] |
| Rousettus    | TTCTTGGTGGATTTTGAATTTGGGTGCTCTACAGCATACTTCTCCAGA   |      |      |      |       | [4281] |
| NycterisT    | TTCTTGGTGGATTTTGAATTTGGGTGCTCTACATCATACTTCTCCAGA   |      |      |      |       | [4248] |
| Nyctimene    | TTCTTGGTGGATTTTGAATTTGGGTGCTCTACGGCATACTTCTCCAGA   |      |      |      |       | [4296] |
| Mole         | TTCTTGGTGGATTTTGAATTTGGGTGCTCTACATCATACTTCTCCTGA   |      |      |      |       | [4308] |
| Horse        | TTCTTGGTGGATTTTGAATTTGGGTGCTCTACATCATACTTCTCCAGA   |      |      |      |       | [4302] |
| Desmodus     | TTCTTGGTGGATTTTGAATTTGGGTGCTCAACATCATACTTCTCCAGA   |      |      |      |       | [4248] |
| Rhinopoma    | TTCTTGGTGGATTTTGAATTTGGGTGCTCTACATCATACTTCTCCAGA   |      |      |      |       | [4320] |
| Emballonura  | TTCTTGGTGGATTTTGAATTTGGGTGCTGTACATCATACTTCTCCAGA   |      |      |      |       | [4260] |
| Cow          | TTCTTGGTGGATTTTGAATTTGGGTGCTCTACGTACATACTTCTCCAGA  |      |      |      |       | [4296] |
| Pangolin     | TTTTGGTAGATTTTGAATTTGGGTGCTCTGTGTACATACTTCTCCAGA   |      |      |      |       | [4302] |
| Whale        | TTCTTGGTGGATTTTGAATTTGGGTGCTCTACGTACATACTTCTCCAGA  |      |      |      |       | [4296] |

|              |                                                     |      |      |      |       |        |
|--------------|-----------------------------------------------------|------|------|------|-------|--------|
| [            | 4360                                                | 4370 | 4380 | 4390 | 4400] |        |
| [            | .                                                   | .    | .    | .    | .     | ]      |
| Tonatia      | ACTTCAGGATGGGCTATCTTTTCATGTCTCCATTGCCAGAAATGACACCA  |      |      |      |       | [4289] |
| Myotis       | ACTTCAGGATGGGCTATCTTTTCATGTCTCCATTGCCAGAAATGATACCA  |      |      |      |       | [4328] |
| Tadarida     | ACTTCAGGATGGGCTATCTTTTCATGTCTCCATTGCCAGAAATGATACCA  |      |      |      |       | [4316] |
| Taphozous    | ACTTCAGGATGGGCTATCTTTTCATGTCTCCATTGCCAGAAATGATACCA  |      |      |      |       | [4322] |
| Megaderma    | ACTTCAGGATGGGCTATCTTTTCATGTCTCTATTGCCAGAAATGATACCA  |      |      |      |       | [4331] |
| Cynopterus   | ACTTCAGGATGGGCTGTCTTTTCATGTCTCCATTGCCAGAAACGATACCA  |      |      |      |       | [4343] |
| Pteropus     | ACTTCAGGATGGGCTGTCTTTTCATGTCTCCATTGCCAGAAACGATACCA  |      |      |      |       | [4328] |
| Hipposideros | ACTTCAGGATGGACTATCTTTTCATGTCTCCATTGCCAGAAATGATACCG  |      |      |      |       | [4367] |
| Cat          | ACTTCAGGATGGGTTATCTTTTCATGTCTCCATTGCCAGAAATGATACCA  |      |      |      |       | [4370] |
| Human        | ACTTCAGGATGGGCTATCTTTTCATGTCTCTATTGCCAAAAATGACACCA  |      |      |      |       | [4364] |
| Mouse        | ACTTCAGGATGGGCTGTCTTTTCATGTCTTCTATTGCCAGAAACGATACCG |      |      |      |       | [4262] |
| Flyinglemur  | ACTTCAGGATGGGCTATCTTTTCATGTCTCCATTGCCAGAAATGATACCA  |      |      |      |       | [4373] |
| NycterisG    | ACTTCAGGATGGGCTATCATTTTCATGTCTCCATTGCCAGAAATGATACCG |      |      |      |       | [4274] |
| Antrozous    | ACTTCAGGATGGGCTCGCATTTTCATGTCTCCATTGCCAGAAATGATACCG |      |      |      |       | [4319] |
| Rhogeessa    | ACTTCAGGATGGGCTCGCTTTTCATGTCTCCATTGCCAGAAATGATACCG  |      |      |      |       | [4337] |
| Noctilio     | GCTTCAGGATGGGCTATCTTTTCATGTCTCCATTGCCAGAAATGATACCA  |      |      |      |       | [4325] |
| Natalus      | ACTTCAGGATGGGCTATCTTTTCATGTCTCCATTGCCAGAAATGATACCA  |      |      |      |       | [4322] |
| Rhinolophus  | ACTTCAGGATGGACTATCTTTTCACGTCTCCATTGCCAGAAATGATACCA  |      |      |      |       | [4358] |
| Rousettus    | ACTTCAAGATGGGCTGTCTTTTCATGTCTCCATTGCCAGAAATGATACCA  |      |      |      |       | [4331] |
| NycterisT    | ACTTCAGGATGGGCTATCATTTTCATGTCTCCATTGCCAGAAATGATACCG |      |      |      |       | [4298] |
| Nyctimene    | ACTTCAGGATGGGCTGTCTTTTCATGTCTCCATTGCCAGAAATGATACCA  |      |      |      |       | [4346] |
| Mole         | ACTTCAGGATGGACTCTCTTTTCATGTCTCCATTGCCAGAAATGATACCA  |      |      |      |       | [4358] |
| Horse        | ACTTCAGGATGGGCTATCTTTTCACGTCTCCATTGCCAGAAATGATACCA  |      |      |      |       | [4352] |
| Desmodus     | ACTTCAGGATGGGCTATCTTTTCATGTGTCCATTGCCAGAAATGATACCG  |      |      |      |       | [4298] |
| Rhinopoma    | ACTTCAGGATGGGCTATCGTTTCATGTCTCCATTGCCAGAAATGATACCA  |      |      |      |       | [4370] |
| Emballonura  | ACTTCAGGATGGGCTATCTTTTCATGTCTCCATTGTAGAAACGATACCA   |      |      |      |       | [4310] |
| Cow          | ACTTCAAGATGGACTATCTTTTCATGTCTCCATTGCCAGAAATGATACCG  |      |      |      |       | [4346] |
| Pangolin     | ACTTCAGGATGGGTTATCTTTTCACGTCTCCATTGCCAGAAATGATACGA  |      |      |      |       | [4352] |
| Whale        | ACTTCAGGATGGGCTATCTTTTCACGTCTCCATTGCCAGAAATGATACCA  |      |      |      |       | [4346] |

|          |                                                    |      |      |      |       |        |
|----------|----------------------------------------------------|------|------|------|-------|--------|
| [        | 4410                                               | 4420 | 4430 | 4440 | 4450] |        |
| [        | .                                                  | .    | .    | .    | .     | ]      |
| Tonatia  | TTTATATTTTAGGAGGGCATTCACTTGCCAATAACATCCGCCCTGCCAAC |      |      |      |       | [4339] |
| Myotis   | TTTATATTTTAGGAGGACATTCACTTGCCAATAACATCCGCCCTGCCAAC |      |      |      |       | [4378] |
| Tadarida | TTTATATTTTAGGAGGACATTCACTTGCCAATAACGTCGCCCTGCCAAC  |      |      |      |       | [4366] |



|              |                                                      |          |
|--------------|------------------------------------------------------|----------|
| Taphozous    | TTTATATTTTAGGAGGACATTCACTTGCCAATAACGTACGCCCTGCCAAC   | [ 4372 ] |
| Megaderma    | TTTATATTTTAGGAGGACATTCACTTGCCAATAACATCCGGCCGGCCAAC   | [ 4381 ] |
| Cynopterus   | TTTATATTTTAGGAGGGCATTTCRCTTGCCAATAACGTCCGGCCCTGCCAAC | [ 4393 ] |
| Pteropus     | TTTATATTTTAGGAGGGCATTCACTTGCCAATAATGTCCGGCCCTGCCAAC  | [ 4378 ] |
| Hipposideros | TTTATATTTTAGGAGGACATTCACTTGCCAATAACATCCGGCCCTGCCAAC  | [ 4417 ] |
| Cat          | TTTATATTTTAGGAGGACACTCACTTGCCAATAACATCCGGCCCTGCCAAC  | [ 4420 ] |
| Human        | TCTATATTTTAGGAGGACATTCACTTGCCAATAATATCCGGCCCTGCCAAC  | [ 4414 ] |
| Mouse        | TTTATATTTTAGGAGGACACTCACTTGCCAGTAATATACGCCCTGCTAAC   | [ 4312 ] |
| Flyinglemur  | TTTATATTTTAGGAGGACATTCACTTGCCAACAACATCCGGCCCTACCAAT  | [ 4423 ] |
| NycterisG    | TTTATATTTTAGGAGGACATTCACTTGCCAATAACGTCCGGCCCTGCCAAC  | [ 4324 ] |
| Antrozous    | TTTATATTTTAGGAGGACATTCACTTGCCAATAACATCCGGCCCTGCCAAC  | [ 4369 ] |
| Rhogeessa    | TTTATATTTTAGGAGGACATTCACTTGCCAATAACATCCGGCCCTGCCAAC  | [ 4387 ] |
| Noctilio     | TTTATATTTTAGGAGGGCATTCACTTGCCAATAACATCCGGCCCGCCAAC   | [ 4375 ] |
| Natalus      | TTTATATTTTAGGAGGACATTCACTTGCCAATAATGTCCGGCCCTGCCAAC  | [ 4372 ] |
| Rhinolophus  | TTTATATTTTAGGAGGACATTCACTTGCCAATAACATCCGGCCCTGCCAAC  | [ 4408 ] |
| Rousettus    | TTTATATTTTAGGAGGGCATTCACTTGCCAATAACATCCGGCCCTGCCAAC  | [ 4381 ] |
| NycterisT    | TTTATATTTTAGGAGGACATTCACTTGCCAATAACGTCCGGCCCTGCCAAC  | [ 4348 ] |
| Nyctimene    | TTTATATTTTAGGAGGGCATTCACTTGCCAATAACGTCCGGCCCTGCCAAC  | [ 4396 ] |
| Mole         | TTTATATTTTAGGAGGACATTCTCTTGCCAATAACATCCGGCCCTGCCAAC  | [ 4408 ] |
| Horse        | TTTATATTTTAGGAGGACATTCACTTGCCAATAACATCCGGCCCTGCCAAC  | [ 4402 ] |
| Desmodus     | TCTATATTTTAGGAGGGCATTCACTTGCCAATAATATCCGGCCCTGCCAAC  | [ 4348 ] |
| Rhinopoma    | TTTATATTTTAGGAGGACATTCACTTGCCAATAACATCCGGCCCTGCCAAC  | [ 4420 ] |
| Emballonura  | TTTATATTTTAGGAGGACATTCACTTGCCAATAATGTCCGGCCCTGCCAAC  | [ 4360 ] |
| Cow          | TTTATATTTTAGGAGGCCATTCACTTGCCAATAACATCCGGCCCTGCCAAC  | [ 4396 ] |
| Pangolin     | TTTATATTTTAGGAGGACATTCACTTGCCAATAACATCCGGCCCTGCCAAC  | [ 4402 ] |
| Whale        | TTTATATTTTAGGAGGCCATTCACTTGCCAATAACATCCGGCCCTGCCAGT  | [ 4396 ] |

[ 4460 4470 4480 4490 4500 ]  
[ . . . . . ]

|              |                                                    |          |
|--------------|----------------------------------------------------|----------|
| Tonatia      | CTATACAGAATAAAGGTTGATCTACCCCTGGGTAGCCCGGCTGTGAATTG | [ 4389 ] |
| Myotis       | CTATACAGAATAAGGGTTGATCTCCCCTGGGTAGCCAGCTGTGAATTG   | [ 4428 ] |
| Tadarida     | CTATACAGAATAAAGGTTGATCTCCCCTGGGTAGCCAGCTGTAAACTG   | [ 4416 ] |
| Taphozous    | CTATACAGAATAAAGGTTGATCTACCCCTGGGTAGCCAGCTGTGAATTG  | [ 4422 ] |
| Megaderma    | CTGTACAGAATAAAGGTTGATCTCCCCTGGGTAGCCAGCTGTGAATTG   | [ 4431 ] |
| Cynopterus   | CTATACAGAATAAAGGTCGATCTGCCCTGGGTAGCCAGCTGTGAATTG   | [ 4443 ] |
| Pteropus     | CTATACAGAATAAAGGTTGATCTCCCCTGGGTAGCCAGCTGTGAATTG   | [ 4428 ] |
| Hipposideros | CTGTACAGAATAAAGGTTGATCTCCCCTGGGTAGCCAGCTGTCAATTG   | [ 4467 ] |
| Cat          | CTATACAGCATAAAGGTTGATCTCCCCTGGGTAGCCAGCTGTGAATTG   | [ 4470 ] |
| Human        | CTGTACAGAATAAAGGTTGATCTTCCCCTGGGTAGCCAGCTGTGAATTG  | [ 4464 ] |
| Mouse        | TTGTATAGAATAAAGGTGGACCTTCCCCTGGGTAGCCAGCTGTGAATTG  | [ 4362 ] |
| Flyinglemur  | CTATACAGAATAAAGGTTGATCTCCCCTGGGTAGCCAGCTGTGAATTG   | [ 4473 ] |
| NycterisG    | CTATACAGAATAAAGTTGACCTCCCCTTAGGTAGCCAGCTGTGAATTG   | [ 4374 ] |
| Antrozous    | CTGTACAAAATAACAGTTGATCTCCCCTGGGTAGCCAGCTGTGAATTG   | [ 4419 ] |
| Rhogeessa    | CTGTACAGAATAAAGGTTGATCTCCCCTGGGTAGCCAGCTGTGGATTG   | [ 4437 ] |
| Noctilio     | CTCTACAGAATAAAGGTTGACCTCCCCTGGGTAGCCAGCTGTGAATTG   | [ 4425 ] |
| Natalus      | CTGTACAGAATAAAGGTTGATCTCCCCTGGGTAGCCAGCTGTGAGTTG   | [ 4422 ] |
| Rhinolophus  | CTATATAGAATAAAGGTTGATCTCCCCTGGGTAGCCAGCTGTAAATTG   | [ 4458 ] |
| Rousettus    | CTATACAGAATAAAGGTTGATCTTCCCCTGGGTAGCCAGCTGTGAATTG  | [ 4431 ] |
| NycterisT    | CTATACAGAATAAAGTTGACCTCCCCTGGGTAGCCAGCTGTGAATTG    | [ 4398 ] |
| Nyctimene    | CTATACAGAATAAAGGTCGATCTCCCCTGGGTAGCCAGCTGTGAATTG   | [ 4446 ] |
| Mole         | CTATATAGAATAAAGGTTGATCTCCCCTGGGTAGCCAGCTGTGAATTG   | [ 4458 ] |
| Horse        | CTATACAGAATAAAGGTTGATCTCCCCTGGGTAGTCCAGCAGTGAATTG  | [ 4452 ] |
| Desmodus     | CTATACAGAATAAAGGTTGATCTCCCCTGGGTAGCCAGCTGTGAATTG   | [ 4398 ] |
| Rhinopoma    | CTATACAGAATAAAGGTTGATCTCCCCTGGGTAGCCAGCTGTAAATTG   | [ 4470 ] |
| Emballonura  | CTATACAGAATAAAGGTTGATCTACCTCTGGGTAGTCCAGCTGTGAATTG | [ 4410 ] |
| Cow          | CTGTACAGAATAAAGGTTGATCTCCCCTGGGTAGCCAGCTGTGGAGTG   | [ 4446 ] |
| Pangolin     | CTATACAGAATAAAGGTTGATCTCCCCTGGGTAGCCAGCTGTGGATTG   | [ 4452 ] |
| Whale        | CTATACAGAATAAAGGTTGATCTCCCCTGGGTAGCCAGCTGTGAATTG   | [ 4446 ] |

[ 4510 4520 4530 4540 4550 ]  
[ . . . . . ]

|              |                                                     |          |
|--------------|-----------------------------------------------------|----------|
| Tonatia      | CACGGTGTGCCAGGAGGAATCTCTGTCTCTAGTGCAATCCTGACTCAAA   | [ 4439 ] |
| Myotis       | CACAGTTTTGCCAGGAGGAATCTCTGTCTCTAGTGCAATCCTGACTCAGA  | [ 4478 ] |
| Tadarida     | CACAGTTTTGCCAAGAGGAATCTCTGTCTTCCAGTGCAATCCTGACTCAAA | [ 4466 ] |
| Taphozous    | CACAGTTTTGCCAGGAGGAATCTCTGTCTCCAGTGCAATCCTGACTCAAA  | [ 4472 ] |
| Megaderma    | CACAGTTTTGCCAGGAGGAATCTCAGTTTCCAGTGCAATCCTGACTCAAA  | [ 4481 ] |
| Cynopterus   | CACAGTTTTACCAGGAGGAATCTCTGTCTCCAGTGCAATCCTGACTCAAA  | [ 4493 ] |
| Pteropus     | CACAGTTTTACCAGGAGGAATCTCTGTCTCCAGTGCAATCCTGACTCAAA  | [ 4478 ] |
| Hipposideros | CACAATTTGCCAGGAGGAATCTCTGTCTCCAGTGCGATCCTGACTCAAA   | [ 4517 ] |
| Cat          | CACAGTATTGCCAGGAGGAATCTCTGTCTCCAGTGCGATCCTGACTCAAA  | [ 4520 ] |
| Human        | CACAGTCTTGCCAGGAGGAATCTCTGTCTCCAGTGCAATCCTGACTCAAA  | [ 4514 ] |

|             |                                                    |        |
|-------------|----------------------------------------------------|--------|
| Mouse       | CACAGTCTTGCCAGGAGGAATCTCTGTCTCCAGTGCATCCTCACTCAA   | [4412] |
| Flyinglemur | CACAGTCTTGCCAGGAGGAATCTCTGTCTCTAGTGGAAATCCTAACTCAA | [4523] |
| NycterisG   | CACAGTTTTGCCAGGAGGAATCTCTGTCTCCAGTGCATCCTGACTCAA   | [4424] |
| Antrozous   | CACAGTTTTGCCAGGAGGAATCTCTGTCTCTAGTGCATCCTAACTCAA   | [4469] |
| Rhogeessa   | CACAGTTTTGCCAGGAGGATCTCTGTCTCTAGTGCATCCTGACTCAA    | [4487] |
| Noctilio    | CACAGTTCTGCCAGGAGGAATCTCTGTCTCCAGTGCATCCTAACTCAA   | [4475] |
| Natalus     | CACGTTTTTACCTGGAGGAATCTCTGTCTCTAGTGCATCCTGACTCAA   | [4472] |
| Rhinolophus | CACAGTTTTGCCAGGAGGAATATCTGTCTCCAGTGCATCCTGACTCAA   | [4508] |
| Rousettus   | CACAGTTTTACCAGGAGGAATCTCTGTCTCCAGTGCATCCTGACCCAAA  | [4481] |
| NycterisT   | CACAGTTTTGCCAGGAGGAATCTCTGTCTCCAGTGCATCCTGACTCAA   | [4448] |
| Nyctimene   | CACAGTTTTACCAGGAGGAATCTCTGTCTCCAGTGCATCCTGACTCAA   | [4496] |
| Mole        | CACAGTCTTACCAGGAGGAATCTCTGTTTCCAGTGCATCCTGACTCAA   | [4508] |
| Horse       | CACAGTCTTGCCAGGAGGAATCTCTGTCTCCAGTGCATCCTGACTCAA   | [4502] |
| Desmodus    | CACGTTTTTACCAGGAGGAATCTCTGTCTCCAGTGCATCCTGACTCAA   | [4448] |
| Rhinopoma   | CACAGTTTTGCCAGGAGGAATCTCTGTCTCTAGTGCATCCTGACTCAA   | [4520] |
| Emballonura | CACAGTTTTGCCAGGAGGAATCTCTGTCTCCAGTGCATCCTGACTCAA   | [4460] |
| Cow         | CACAGTCTTGCCAGGAGGAATCTCTGTCTCCAGTGCATCCTGACTCAA   | [4496] |
| Pangolin    | CACAGTCTTGCCAGGAGGAATCTCTGTCTCCAGTGCATCCTGACT???   | [4502] |
| Whale       | CACAGTCATGCCAGGAGGAATCTCTGTCTCCAGTGCATCCTGACTCAA   | [4496] |

[ 4560 4570 4580 4590 4600 ]  
[ . . . . . ]

|              |                                                      |        |
|--------------|------------------------------------------------------|--------|
| Tonatia      | CAAACAGTGATGAATTTGTGATGTGGGTGGCTATCAGCTTGAAAAATCAG   | [4489] |
| Myotis       | CAAACAATGATGAATTTGTTATTGTGGGTGGCTATCAGCTTGAAAAATCAA  | [4528] |
| Tadarida     | CAAACAATGATGAATTTGTGATGTGGGTGGCTATCAGCTTGAAAAATCAA   | [4516] |
| Taphozous    | CAAACAATGATGAATTTGTTATTGTGGGTGGCTATCAGCTTGAAAAATCAA  | [4522] |
| Megaderma    | CAAGCAATGATGAATTTGTGATGTGGGTGGCTATCAGCTTGAAAAATCAA   | [4531] |
| Cynopterus   | CAAACAAGGATGAATTTGTTATTGTGGGTGGCTATCAGCTTGAAAAATCAA  | [4543] |
| Pteropus     | CAAACAATGATGAATTTGTTATTGTGGGTGGCTACCAGCTTGAAAAATCAA  | [4528] |
| Hipposideros | CAAACAATGATGAATTTGTTATTGTGGGTGGCTATCAGCTTGAAAAATCAA  | [4567] |
| Cat          | CAAACAGTGATGAATTTGCTATTGTTGGTGGCTATCAGCTTGAAAAATCAA  | [4570] |
| Human        | CTAACAAATGATGAATTTGTTATTGTGGGTGGCTATCAGCTTGAAAAATCAA | [4564] |
| Mouse        | CAAACAATGATGAATTTGTTATTGTGGGTGGCTATCAGCTTGAAAAATCAA  | [4462] |
| Flyinglemur  | CTAATAATGACGAATTTGTTATTGTTGGTGGCTATCAGCATGAAAAATCAA  | [4573] |
| NycterisG    | CAAACCAATGATGAATTTGTTATTGTGGGTGGCTATCAGCTTGAAAAATCAA | [4474] |
| Antrozous    | CAAGCAATGATGAATTTGTGATGTGGGTGGCTATCAGCTTGAAAAATCAA   | [4519] |
| Rhogeessa    | CAAACAATGATGAATTTGTGATGTGGGTGGCTATCAGATTGAAAAATCAA   | [4537] |
| Noctilio     | CAAACAATGATGAATTTGTTATTGTGGGTGGCTATCAGCTTGAAAAATCAA  | [4525] |
| Natalus      | AAAACAATGATGAATTTGTTATTGTGGGTGGCTATCAGCTTGAAAAATCAA  | [4522] |
| Rhinolophus  | CAAGCAATGATGAATTTGTTATTGTGGGTGGCTATCAGCTTGAAAAATCAA  | [4558] |
| Rousettus    | CAAACAAGGATGAATTTGTTATTGTGGGTGGCTATCAGCTTGAAAAATCAA  | [4531] |
| NycterisT    | CAAACCAATGATGAATTTGTTATTGTGGGTGGCTATCAGCTTGAAAAATCAA | [4498] |
| Nyctimene    | CAAACAAGGATGAATTTGTTATTGTGGGTGGCTATCAGCTTGAAAAATCAA  | [4546] |
| Mole         | CAAACAAGGATGAATTTGTTATTGTTGGTGGCTATCAGCTTGAAAAATCAA  | [4558] |
| Horse        | CAAACAAGGATGAATTTGTTATTGTTGGTGGCTATCAGCTTGAAAAATCAA  | [4552] |
| Desmodus     | CAAACAGTGATGATTTGTTATTGTGGGTGGCTATCAGCTTGAAAAATCAA   | [4498] |
| Rhinopoma    | CAAACAAGGATGAATTTGTTATTGTGGGTGGCTATCAACCTGAAAAATCAA  | [4570] |
| Emballonura  | CAAACAAGGATGAATTTGTTATTGTGGGTGGCTATCAGCTTGAAAAATCAA  | [4510] |
| Cow          | TAAGCAATGATGAATTTGTTATTGTTGGTGGCTATCAGCTTGAAAAATCAA  | [4546] |
| Pangolin     | ???????????????????????????????????????????????????? | [4552] |
| Whale        | TAAGCAATGATGAATTTGTTATCATCGGTGGCTATCAGCTTGAAAAATCAA  | [4546] |

[ 4610 4620 4630 4640 4650 ]  
[ . . . . . ]

|              |                                                      |        |
|--------------|------------------------------------------------------|--------|
| Tonatia      | AAAAGAATGGTCTGCAATGTCATCTCTCTTTGAGAACAAAGATAGAAAAT   | [4539] |
| Myotis       | AAAAGAATGGTCTGCAACATCGTCTCTTTTGAAGACAACAGATAGAAAAT   | [4578] |
| Tadarida     | AAAAGAATGGTCTGCAACATCATCTCTTTTGAAGACAACAGATAGAAAAT   | [4566] |
| Taphozous    | AAAAGAATGGTCTGCAACATCATCTCTTTTGAAGACAACAGATAGAAAAT   | [4572] |
| Megaderma    | AAAAGAATGGTCTGCAACATCATCTCTTTTGAAGACAACAGATAGAAAAT   | [4581] |
| Cynopterus   | AAAAGAATGGTCTGCAATATCGTCTCTTTTGAAGACAACAGATAGAAAAT   | [4593] |
| Pteropus     | AAAAGAATGGTCTGCAATATCGTCTCTTTTGAAGACAACAGATAGAAAAT   | [4578] |
| Hipposideros | AAAAGAATGGTCTGCAACATCATCTCTTTTGAAGACAACAGATAGAAAAT   | [4617] |
| Cat          | AAAAGAATGGTCTGCAACATGTCCTCTTTTGTGGACAACAAGATAGAAAAT  | [4620] |
| Human        | AAAAGAATGATCTGCAACATCATCTCTTTTGAAGACAACAGATAGAAAAT   | [4614] |
| Mouse        | AAAAGGATGGTCTGCAGCCTTGTCTCTTAGGGGACAACACGATTGAAAAT   | [4512] |
| Flyinglemur  | AAAAGAATGGTCTGCAACATCATCTCTTTTGAAGACAATAAGATAGAAAAT  | [4623] |
| NycterisG    | AAAAGAATGGTCTGCAACATCATCTCTTTTGAAGACAACAGATAGAAAAT   | [4524] |
| Antrozous    | AAAAGAATGGTCTGCAACATAATCTCTTTTGAAGACAAGATAGAGAT      | [4569] |
| Rhogeessa    | AAAAGAATGGTCTGCAACATAATCTCTTTTGAAGACAAGATAGAGAT      | [4587] |
| Noctilio     | AAAAGACTGGTCTGCAACATCATCTCTTTTGAAGGACAACAAGATAGAAAAT | [4575] |
| Natalus      | AAAAGAATGGTCTGCAACATCATCTCTTTTGAAGACAATAAGATAGAAAAT  | [4572] |

|             |                                                      |        |
|-------------|------------------------------------------------------|--------|
| Rhinolophus | AAAAGAATGGTCTGCAACATTGTCTCTTTTGAGGACAACAATATAGAAAT   | [4608] |
| Rousettus   | AAAAGAATGGTCTGCAATATCATCTCTTTTCGAGGACAACAAGATAGCAAT  | [4581] |
| NycterisT   | AAAAGAATGGTCTGCAACATCATCTCTTTTGAAGACAACAAGATAGAAAT   | [4548] |
| Nyctimene   | AAAAGAATGGTCTGCAATATCATCTCTTTTCGAGGACAACAAGATAGCAAT  | [4596] |
| Mole        | AAAAGAATGGTCTGCAACATTGTCTCTTTTAGAAGACAACAAGATAGATAT  | [4608] |
| Horse       | AAAAGAATGGTCTGCAACATTGTCTCTTTTGAGGACAACAAGATAGAAAT   | [4602] |
| Desmodus    | AAAAGAATGGTCTGCAACATCATCTCTCTTTGAGGGACAACAAGATAGAAAT | [4548] |
| Rhinopoma   | AAAAGAATGGTCTGCAACATCGTCTCTTTTGAGGACAACAAGATAGAAAT   | [4620] |
| Emballonura | AAAAGAATGGTATGCAATATCATCTCTTTTGAGGACAACAAGATAGAAAT   | [4560] |
| Cow         | AAAAGAATGGTCTGTAACATCATCTCTTTCAAGGATAACAAGATAGACAT   | [4596] |
| Pangolin    | ???????????????????????????????????????????????????? | [4602] |
| Whale       | AAAAGAATGGTCTGCAACGTCATCTCTTTTCGAGGACAACAAGATGGAAT   | [4596] |

[ 4660 4670 4680 4690 4700 ]  
[ . . . . . ]

|              |                                                      |        |
|--------------|------------------------------------------------------|--------|
| Tonatia      | TCGTGAGATGGAGACCCAGATTGGACCCAGACATTAACACAGCAAGA      | [4589] |
| Myotis       | TCAGGAGAAGGAGACCCAGATTGGACCCAGATATTAAGCACAGCAAGA     | [4628] |
| Tadarida     | TCGTGAGATGGAGACCCAGATTGGACCCAGATATTAAGCATAGCAAGA     | [4616] |
| Taphozous    | TCCTGAGATGGAGACCCCAATTGGACCCAGATTTAAACACACCAAGA      | [4622] |
| Megaderma    | TCGTGAGATGGAGACCCAGATTGGACCCAGATATTAAGCACAGCAAGA     | [4631] |
| Cynopterus   | TCGTGAGATGGAACCCAGATTGGACCCCGATATTAAGCACAGCAAGA      | [4643] |
| Pteropus     | TCGTGAGATGGAGACCCCGATTGGACCC????????????????????     | [4628] |
| Hipposideros | TCGTGAGAAGGAGACCCAGATTGGACCCAGATATTAAGCACA?CAAGA     | [4667] |
| Cat          | TCG????????????????????????????????????????????????  | [4670] |
| Human        | TCGTGAGATGGAGACCCAGATTGGACCCAGACATTAAGCACAGCAAGA     | [4664] |
| Mouse        | CAGTGAGATGGAGACTCTGACTGGACCTCAGATATTAAGCATAGCAAAA    | [4562] |
| Flyinglemur  | TCGTGAGATGGAGACCCAGATTGGACCCAGATATTAAGCACAGCAAGA     | [4673] |
| NycterisG    | TCGTGAGATGGAGACCCAGATTG?ACCCAGATATTAAGC????????      | [4574] |
| Antrozous    | TCGTGACATGGAGACCCCGGATTG????????????????????????     | [4619] |
| Rhogeessa    | TCGTGAGATGGAGCCCGGATTGGACCCAGATATTA????????????      | [4637] |
| Noctilio     | TCGTGAGATGGAGACCCAGATTGGACCCAGACATTAAGCACAGCAAGA     | [4625] |
| Natalus      | TCATGAGATGGAGACCCAGATTGGACCCAGATATTAAGCACAGCAAGT     | [4622] |
| Rhinolophus  | TCGTGAGATGGAGACCCAGATTGGACCCAGATATTAAGCACAGCAAGA     | [4658] |
| Rousettus    | TCGTGAGATGGAGACCCCGGATTGGACCCCGAT????????????????    | [4631] |
| NycterisT    | TCGTGAGATGGAGACCCAGATTGGACCCAGATATTAACACAGCAAGC      | [4598] |
| Nyctimene    | TCGTGAGATGGAGACCCAGATTGGACCCCGATATTAAGCACAGCAAGA     | [4646] |
| Mole         | TCAGGAGATGGAGACTCCAGATTGGACCCAGATATTAAGCACAGCAAGA    | [4658] |
| Horse        | TCGTGAGATGGAGACCCAGATTGGACCCAGATATTAAGCACAGCAAGA     | [4652] |
| Desmodus     | TCGTGAGATGGAGACCCAGACTGGACCCAG????????????????????   | [4598] |
| Rhinopoma    | TCGTGAGATGGAGACCCAGATTGGACCC??????????????????????   | [4670] |
| Emballonura  | TCGTGAGATGGAGACCCAGATTGGACTGCAGATATTAAGCACAGCAAGA    | [4610] |
| Cow          | TCCTGAGATGGAACCCAGATTGGACCCAGATATTAAGCACAGCAAGA      | [4646] |
| Pangolin     | ???????????????????????????????????????????????????? | [4652] |
| Whale        | TCGTGAGATGGAACCCAGATTGGACCCAGATATTAAGCACAGCAAGA      | [4646] |

[ 4710 4720 4730 4740 4750 ]  
[ . . . . . ]

|              |                                                          |        |
|--------------|----------------------------------------------------------|--------|
| Tonatia      | TATGGTTTGGAA?????GGAGGCCTAGAGGTGCCCCACCGAGGTCCC          | [4639] |
| Myotis       | TATGGTTGGGAAGAACCTGAAAGCCTAGAGGTGCCCCACCGAAGGCC          | [4678] |
| Tadarida     | TATGGTTTGGACGAACCCGAGGGCTCGAGGTGCCCCACCGAAGGCC           | [4666] |
| Taphozous    | TATGGGTTTGGAA????????????????????????????????????        | [4672] |
| Megaderma    | TATGGTTTGGGAGAACC CGAGGGCTCGAGGTGCCCCCTACAGAGGCC         | [4681] |
| Cynopterus   | TATGGTTTGAC??????????????????????????????????????        | [4693] |
| Pteropus     | ?????????????CAACCTGGAGGCCTAGACGTGCCCCACGGAAGTCCC        | [4678] |
| Hipposideros | TATGG?TTGGAACAACCTGGAGGCCTGGAAGTGCCCCACAGAAAGGCC         | [4717] |
| Cat          | ?????????????GAGCCTGGAGGCCTAGTGGTGCCCCACAGAAAGGCC        | [4720] |
| Human        | TATGGTTTGGAAAGAGCCGGGAGGCCTGGTGGTGCCCTCCACAGATGCC        | [4714] |
| Mouse        | TATGGTTTGGAA??????????????????????????????????????       | [4612] |
| Flyinglemur  | TATGG?TTGG?GAACCCGGAGGCCTGGTGGTGCCCCACCGATGCC            | [4723] |
| NycterisG    | ?????????????GAAGCCGAAGGCCTAGACGTGCCCCACAGAAAGGCC        | [4624] |
| Antrozous    | ??????????????????????????????????????????????????       | [4669] |
| Rhogeessa    | ?????????????GAACCCGAGGCCTCGAGGTGCCCCGACGGAAGGCC         | [4687] |
| Noctilio     | TTTGGTTGGAACAACCTGGAGGCCTAGAGGTGCCCCACAGAGGCC            | [4675] |
| Natalus      | TATGGTTTGGAAAGAACC GGAGGCCTAGAGGTGCCCCACGGAAGGCC         | [4672] |
| Rhinolophus  | TTGGTTTGGAAAGAACCTGGAGGCCTCGTGGTGCCCCACAGAAAGGCC         | [4708] |
| Rousettus    | ??????????????????????????????????????????????????       | [4681] |
| NycterisT    | TATGGTTTGGAA?????????????????????????????????????GAAGGCC | [4648] |
| Nyctimene    | TAT?????????????CCCGAGGCCTGGAGGTGCCCCACGGAAGTCCC         | [4696] |
| Mole         | TATGGTTTGGAG?????????????ACTGGTGGCGCCCCACGGAAGTACC       | [4708] |
| Horse        | CATGGTTTGGAA?????????????CCTAGAGGTGCCCTCCTACGGAAGGCC     | [4702] |
| Desmodus     | ?????????????????CCCGAGGCCTAGAGGTGCCCCACCGAGGTCCC        | [4648] |

|             |                                                              |        |
|-------------|--------------------------------------------------------------|--------|
| Rhinopoma   | ???????????????????????????????????????????????????????????? | [4720] |
| Emballonura | TATGGTTGGAAG?????GGAGGCCTAGAGGTGCCCCCACCAGAAAGCCC            | [4660] |
| Cow         | TATGGTTTGAAGAGCCAGGAGC-----CCGCCCCCACCAGAAAGCCC              | [4690] |
| Pangolin    | ????????????????CCTGGAGGCCTAGTGATGCCGCCACCGAAAGCCC           | [4702] |
| Whale       | TATGGTTTGAAGAACCAGGAGGCCTGGCGGTGCCCCCACCAGAAGCCC             | [4696] |

[ 4760 4770 4780 4790 4800 ]  
[ . . . . . ]

|              |                                                      |        |
|--------------|------------------------------------------------------|--------|
| Tonatia      | AGTCAGCCTCACCCTCTGTACGTGGAGGACACCCCGAGTCGCCACTGC     | [4689] |
| Myotis       | GGTCAGTCCCACCACCCCATATGTGGAGGACACCCCGAGCCCGCTGC      | [4728] |
| Tadarida     | GGTCAGCCCCACCACCCCGTACGTGGAGGACACCCCGAGCCACCAATGC    | [4716] |
| Taphozous    | ???????????????????????????????????????????????????? | [4722] |
| Megaderma    | GGTCAGCCCCACCACCCCGTATGTGGAGGAGACCCCGAGCCACCCCTGC    | [4731] |
| Cynopterus   | ????GGGTCCACCACCCCATATGTGGAGGACACCCCGAGCCACCCCTGG    | [4743] |
| Pteropus     | AGGCAGCCCCACCACCCCGTATGTGGAGGACACCCCTGGAGCCGCCCTGC   | [4728] |
| Hipposideros | GCTGAGCCCCACCCTGCGTATGTGGAGGACAGCCCGAGCCGCCCTGC      | [4767] |
| Cat          | GGTCAGGCCACCACCCCATACGTGGAGGACACCCAGAGTCGACCCTCC     | [4770] |
| Human        | GGTCAGCCCCACCCTCTGTATGTGGAGGACATCTCGAAACCGCCCTGC     | [4764] |
| Mouse        | ???????????????????????????????????????????????????? | [4662] |
| Flyinglemur  | AGCCAGCCCTACCACCGAGGACGTGGAGGACACCCAGAGCCGCCCTGC     | [4773] |
| NycterisG    | GGTCAGCCCCACCACCCCGTATGTGGAGGACACCCCGAGCCACCACTGC    | [4674] |
| Antrozous    | ?????????????????????ATGTGGAGGACACCCCGAGCCGCCCTGC    | [4719] |
| Rhogeessa    | GATCAGCCCCACTACCCCGTATGTGGAGGACACCCCGAGCCGCCCTGC     | [4737] |
| Noctilio     | AGTCAGCCCCACCACCCCATATGTGGAGGACACCCCTGAGCCACCACTGC   | [4725] |
| Natalus      | GGTCAGCCCCACCACCCCGTACGTGGAGGACACCCCGAGCCGCCCTGC     | [4722] |
| Rhinolophus  | GGTCAGCCCCACCACCGAGTATGTGGAGGACACCCCGAAACCGCCCTGC    | [4758] |
| Rousettus    | ?????????CACCACCCCGTATGTGGAGGACACCCCGAGCCGCCCTGC     | [4731] |
| NycterisT    | GGTCAGCCCCACCACCCCGTATGTGGAGGACACCCCGAGCCGCCCTGC     | [4698] |
| Nyctimene    | AGGCAGCCCCACCACCCCATTTGTGGAGGACACCCCGAGCCGCCCTGC     | [4746] |
| Mole         | CGTCAGCCTCACCACCCCTACGTGGAGGACACCCCGAGCCGCCCTGC      | [4758] |
| Horse        | GGTCAGCCCCACCACCG?CTATGTGGAGGACACCCCGAGCCACCCCTGC    | [4752] |
| Desmodus     | GGTCAGCCCCACCACCCCGTATGTGGAGGACACCCCGAGCCGCCCTGC     | [4698] |
| Rhinopoma    | ???????????????????????????????????????????????????? | [4770] |
| Emballonura  | GCTCAGCCCCACCACCCCGTATGTGGAGGACACCCCGAACCGCCACTGC    | [4710] |
| Cow          | GGTCATCCCCACAACCCCATATGTGGAGGACATCCCGAGCCGCCCTGC     | [4740] |
| Pangolin     | CGTCAGCCTCACCACCCCGTACGTGGAGGACACCGCGAGCCGCCACTGC    | [4752] |
| Whale        | GGTTGGCTTACCACCCCGTACGTGGAGGACACCGCGAGCCGCCCTGC      | [4746] |

[ 4810 4820 4830 4840 4850 ]  
[ . . . . . ]

|              |                                                      |        |
|--------------|------------------------------------------------------|--------|
| Tonatia      | ATGACTCCTACTGCAGCAAGCTGCTGGACCTGGCCTTCCTGCTGGACGGC   | [4739] |
| Myotis       | ACGACTTCTTCTGCAGCAAGCTGCTGGACCTGGTCTTCCTGCTGGACGGC   | [4778] |
| Tadarida     | ACGACTTCTACTGCAGCAAGCTGCTGGACCTGGTCTTCCTGCTGGACGGC   | [4766] |
| Taphozous    | ???????????????????????????????????????????????????? | [4772] |
| Megaderma    | ACGACTTCTTCTGCAGCAAGCTGCTGGACCTGGTCTTCCTGCTGGATGGC   | [4781] |
| Cynopterus   | ACGACTTCTACTGCAGCAAGCTGCTGGATCTGGTCTTCCTGCTGGATGGC   | [4793] |
| Pteropus     | ACGACTTCTACTGCAGCAAGCTGCTGGATCTGGTCTTCCTGCTGGACGGC   | [4778] |
| Hipposideros | ATGACTTCTATTGCAGCAGGCTGCTGGACCTGGCTTTCTACTGGATGGC    | [4817] |
| Cat          | ACGATTTCTATTGCAGCAGGCTTCTGGACCTGGTTTTCTGCTAGACGGC    | [4820] |
| Human        | ACGATTTCTACTGCAGCAGGCTACTGGACCTGGTCTTCCTGCTGGATGGC   | [4814] |
| Mouse        | ???????????????????????????????????????????????????? | [4712] |
| Flyinglemur  | ACGACTTCTTCTGCAGCAGGCTGCTGGATCTGGTCTTCCTGCTGGACGGC   | [4823] |
| NycterisG    | ACGACTTCTACTGCAGCAAGCTACTGGATCTGGTCTTCCTGCTGGACGGC   | [4724] |
| Antrozous    | ACGACTTCTTCTGCAGCAAGCTGCTGGACCTGGTCTTCCTGCTGGACGGC   | [4769] |
| Rhogeessa    | ACGACTTCTTCTGCAGCAAGCTGCTGGACCTGGTCTTCCTGCTGGACGGC   | [4787] |
| Noctilio     | ATGACTTCTACTGCAGCAAGCTGCTGGACCTGGTCTTCCTGCTGGATGGC   | [4775] |
| Natalus      | ATGATTTCTACTGCAGCAAGCTGCTGGACCTGGTCTTCCTGCTGGACGGC   | [4772] |
| Rhinolophus  | ATGACTTCTACTGCAGCAAACTGCTGGACCTGGTCTTCCTGCTGGACGGC   | [4808] |
| Rousettus    | ACGACTTCTACTGCAGCAAGTTGCTGGATCTGGTCTTCCTGCTGGACGGC   | [4781] |
| NycterisT    | ACGACTTCTACTGCAGCAAGCTGCTGGACCTGGTCTTCCTGCTGGACGGC   | [4748] |
| Nyctimene    | ACGACTTCTACTGCAGCAAGTTGCTGGACCTGGTCTTCCTGCTGGACGGC   | [4796] |
| Mole         | ACAGCTTCCACTGCAGCAAGCTGCTGGACCTGGTCTTCCTGCTGGACGGC   | [4808] |
| Horse        | ACGACTTCTACTGCAGCAAGCTTCTGGACCTGGTCTTCCTGCTAGATGGC   | [4802] |
| Desmodus     | ACGACTTCTACTGCAGCAAGCTGCTGGACCTGGTCTTCCTGCTGGACGGC   | [4748] |
| Rhinopoma    | ???????????????????????????????????????????????????? | [4820] |
| Emballonura  | ACAACTTCTACTGCAGCAAGCTGCTGGACCTGGTCTTCCTGCTGGACGGC   | [4760] |
| Cow          | ATGACTTCTTCTGCAGCAAACTCCTGGACCTGGTCTTCCTGCTGGATGGC   | [4790] |
| Pangolin     | ACGACGTGTACTGCAGCAAGCTTCTGGACCTGGTCTTCCTGCTGGACGGC   | [4802] |
| Whale        | ACGACTTCTTCTGCAGCAGACTTCTGGACCTGGTCTTCCTGCTGGACGGC   | [4796] |

[ 4860 4870 4880 4890 4900 ]

[ . . . . . ]

|              |                                                              |        |
|--------------|--------------------------------------------------------------|--------|
| Tonatia      | TCCTCCAAGCTGTCCGAGGCCGAGTTTCGAGGTGCTGAAGGTCTTCGTGGT          | [4789] |
| Myotis       | TCCTCCAAGCTGTCCCGGCCGAGTTTCGAGGTGCTGAAGGTCTTTGTGGT           | [4828] |
| Tadarida     | TCCTCCAAGCTGTCCGAGGCCGAGTTTCGAGGTGCTGAAGGTCTTCGTGGT          | [4816] |
| Taphozous    | ????????????????????????????????????????????????????????     | [4822] |
| Megaderma    | TCCTCCAAGCTGTCCGAGGCCGAGTTTCGAGGTGCTGAAGGTCTTCGTGGT          | [4831] |
| Cynoapterus  | TCCAACAAGCTGTCCGAGGCCGAGTTTCGAGGTGCTGAAGGTCTTCGTGGT          | [4843] |
| Pteropus     | TCCAACAAGCTGTCTGAGGCCGAGTTTCGAGGTGCTGAAGGTCTTTGTGGT          | [4828] |
| Hipposideros | TCCTCCAAGCTGTCCGAGGCCGAGTTTCGAGGTGCTGAAGGCCTTTGTGGT          | [4867] |
| Cat          | TCCTCCAAGCTGTCCGAGGCCGAGTTTCGAAATGCTGAAGGCCTTTGTGGT          | [4870] |
| Human        | TCCTCCAGGCTGTCCGAGGCCGAGTTTGAAGTGTGAAGGCCTTTGTGGT            | [4864] |
| Mouse        | ????????????????????????????????????????????????AAGCTTTGTGGT | [4762] |
| Flyinglemur  | TCCTCCAAGCTGTCCGAGGCCGAGTTTGAAGTGTGAAGGCCTTCGTGGT            | [4873] |
| NycterisG    | TCCTCCAAGCTGTCCGAGGCCGAGTTTCGAAATGCTGAAGGCCTTCGTGGT          | [4774] |
| Antrozous    | TCCTCCAAGCTGTCCCGGCCGAGTTTCGAGGTGCTGAAGGTCTTTGTGGT           | [4819] |
| Rhogeessa    | TCCGCCAAGCTGTCCCGGCCGAGTTTCGAGGTGCTGAAGGTCTTTGTGGT           | [4837] |
| Noctilio     | TCCTCCAAGCTGTCTGAGGCCGAGTTTGAAGTGTGAAGGTCTTCATGGT            | [4825] |
| Natalus      | TCCTCCAAGCTGTCCGAGGCCGAGTTTCGAAATGCTGAAGGCCTTCGTGGT          | [4822] |
| Rhinolophus  | TCCTCCAAGCTGTCCGAGGCCGACTTCGAAATGCTGAAGGTCTTTGTGGT           | [4858] |
| Rousettus    | TCCAACAAGCTGTCCGAGGCCGAGTTTGAAGTGTGAAGGTGTTTCGTGGT           | [4831] |
| NycterisT    | TCCTCCAAGCTGTCCGAGGCCGAGTTTCGAAATGCTGAAGGCCTTCGTGGT          | [4798] |
| Nyctimene    | TCCAACAAGCTGTCCGAGGCCGAGTTTCGAGGTGCTGAAGGTCTTCGTGGT          | [4846] |
| Mole         | TCCTCCAAGCTGTCCGAGGCCGAGTTTGAAGTGTGAAGGCCTTCGTGGT            | [4858] |
| Horse        | TCCTCCAAGCTGTCTGAGGCCGAGTTTCGAAATGCTGAAGGCCTTTGTAGT          | [4852] |
| Desmodus     | TCCTCCAAGCTGTCCGAGGCCGAGTTTCGAGGTGCTGAAGGTCTTCGTGGT          | [4798] |
| Rhinopoma    | ????????????????????????????????????????????????????????     | [4870] |
| Emballonura  | TCCTCCAAGCTGTCCGAGGCCGAGTTTCGACGTGCTGAAGGTCTTCGTGGT          | [4810] |
| Cow          | TCCTCCAAGCTGTCCGAGGCCGAGTTTCGAGACGCTGAAGGCATTTCGTGGT         | [4840] |
| Pangolin     | TCCTCCAAGCTGTCCGAGGCCGAGTTTCGAAATGCTGAAGGTCTTTGTGGT          | [4852] |
| Whale        | TCCTCCAAGCTGTCTGAGGCCGACTTCGAGACGCTGAAGGCCTTCGTGGT           | [4846] |

[ 4910 4920 4930 4940 4950 ]

[ . . . . . ]

|              |                                                          |        |
|--------------|----------------------------------------------------------|--------|
| Tonatia      | GGGCATGATGGAGCGCCTGCACATCTCCAGAAGCGGATCCGCGTGGCCC        | [4839] |
| Myotis       | GGACATGATGGAGCGCCTGCACATCTCCAGAAGCGGATCCGCGTGGCGC        | [4878] |
| Tadarida     | GAGCATGATGGAGCGCCTGCACATCTCCAGAAGTGGATCCGCGTGGCCA        | [4866] |
| Taphozous    | ???????????????????????????????????????????????????????? | [4872] |
| Megaderma    | GGGCATGATGGAGCGCCTGCACATCTCCAGAAGTGGATCCGCGTGGCCG        | [4881] |
| Cynoapterus  | GGGCATGATGGAGCGCCTGCACATCTCCAGAAGCGGATCCGCGTGGCCG        | [4893] |
| Pteropus     | GGGCATGATGGAGCGCCTGCACATCTCCAGAAGCGGATCCGCGTGGCTG        | [4878] |
| Hipposideros | GGGCATGATGGAGCGCCTGCACATCTCCAGAAGCGGATCCGCGTGGCTG        | [4917] |
| Cat          | GGGCATGATGGAGCGCTGCACATCTCAGAAAGCGGATCCGCGTGGCCG         | [4920] |
| Human        | GGACATGATGGAGCGCCTGCACATCTCCAGAAGTGGGTCCGCGTGGCCG        | [4914] |
| Mouse        | GGGCATGATGGAGAGGTTACACATCTCAGAAAGCGCATCCGCGTGGCAG        | [4812] |
| Flyinglemur  | GGGCATGATGGAGCGCCTGCACATCTCCAGAAGTGGATCCGCGTGGCCG        | [4923] |
| NycterisG    | GGACGTGATGGAGCGCCTGCACATCTCCAGAAGAGGATCCGCGTGGCTC        | [4824] |
| Antrozous    | GGACATGATGGAGCGCCTGCACATCTCCAGAAGCGGATCCGCGTGGCCG        | [4869] |
| Rhogeessa    | GGACATGATGGAGCGCCTACACATCTCCAGAAGCGGATCCGCGTGGCCG        | [4887] |
| Noctilio     | GAACATGATGGAGCGCCTGCACATCTCCAGAAGAGGATCCGCGTGGCCG        | [4875] |
| Natalus      | GAACATGATGGAGCGCCTGCACATCTCCAGAAGTGGATCCGCGTGGCCG        | [4872] |
| Rhinolophus  | GGGCATGATGGAGCGCCTGCACATCTCCAGAAGCGCATCCGCGTGTCCG        | [4908] |
| Rousettus    | GGGCACGATGGAGCGCCTGCACATCTCCAGAAGCGGATCCGCGTGGCTG        | [4881] |
| NycterisT    | GGACGTGATGGAGCGCCTGCACATCTCCAGAAGAGGATCCGCGTGGCTC        | [4848] |
| Nyctimene    | GGGCATGATGGAGCGCCTGCACATCTCCAGAAGCGGATCCGCGTGGCCG        | [4896] |
| Mole         | GGACATGATGGAGCGCCTGCACATCTCCAGAAGCGGATCCGCGTGGCCG        | [4908] |
| Horse        | GGGCATGATGGAGCGCTTGCACATCTCCAGAAGCGGATCCGCGTGGCTG        | [4902] |
| Desmodus     | GAACATGATGGAGCGCCTGCACATCTCCAGAAGCGTATCCGCGTGGCCC        | [4848] |
| Rhinopoma    | ???????????????????????????????????????????????????????? | [4920] |
| Emballonura  | GGGCATGATGGAGCGCCTGCACATCTCCAGAAGCGGATCCGCGTGGCCG        | [4860] |
| Cow          | GGGCATGATGGAGCGCTGCACATTTCCAGAAGCGCATCCGCGTGGCCG         | [4890] |
| Pangolin     | GGGCACGATGGAGCGCCTGCACATCTCCAGAAGTGGATCCACGTTGGCCG       | [4902] |
| Whale        | GGGCATGATGGAGCGCCTGCATATCTCCAGAAGCGCATCCGCGTGGCCG        | [4896] |

[ 4960 4970 4980 4990 5000 ]

[ . . . . . ]

|           |                                                             |        |
|-----------|-------------------------------------------------------------|--------|
| Tonatia   | TGGTGGAGTACCACGAGGGCTCCACGCCTACCTCCAGCTCCGGGACCCG           | [4889] |
| Myotis    | TGGTGGAGTACCACGAGGGCTCCACGCCTACATCCAGCTCAGGGACCCG           | [4928] |
| Tadarida  | TGGTGGAGTACCACGAGGGCTCCACGCCTACATCCAGCTCAGGGACCCG           | [4916] |
| Taphozous | ????????????????????????????????????????CATCCAGCTCAGGGACCCG | [4922] |
| Megaderma | TGGTGGAGTACCATGACGGCTCCACGCCTACATCGAGCTCAGGGACCCG           | [4931] |

|              |                                                      |        |
|--------------|------------------------------------------------------|--------|
| Cynoapterus  | TGGTGGAGTACCACGACGGGTCTCACGCCTACCTGGAGCTCAGGGACCGC   | [4943] |
| Pteropus     | TGGTGGAGTATCATGACGGCTCTCACGCCTACCTCGAGCTCAGGGAGCGG   | [4928] |
| Hipposideros | TGGTGGAGTACCACGACGGCTCCCATTCTCATCGAGCTCAGGGACCGG     | [4967] |
| Cat          | TGGTGGAGTACCATGACGGCTCCCACGCCTACATCCABCTCAAGGACCGG   | [4970] |
| Human        | TGGTGGAGTACCACGACGGCTCCCACGCCTACATCGGGCTCAAGGACCGG   | [4964] |
| Mouse        | TGGTAGAGTACCATGATGGCTCCCGTGCCTACCTTGAGCTCAAGGCCCGG   | [4862] |
| Flyinglemur  | TGGTGGAGTACCACGATGGCTCCCACGCCTACATCTCGCTCAAGGACCGG   | [4973] |
| NycterisG    | TGGTGGAGTACCACGAGGGCTCCCACGCCTACATCCAGCTCCGGGACCGG   | [4874] |
| Antrozous    | TGGTGGAGTACCACGAGGGCTCCCACGCCTACATCCAGCTCAGGGACCGG   | [4919] |
| Rhogeessa    | TGGTGGAGTACCACGAGGGCTCCCACGCCTACATCCAGCTCAGGGACCGT   | [4937] |
| Noctilio     | TGGTGGAGTATCATGAGGGCTCCCATTCTCATCCAGCTCCGGGACCGG     | [4925] |
| Natalus      | TGGTGGAGTACCACGAGGGCTCCCACGCCTACATCCAGCTCAGGGACCGG   | [4922] |
| Rhinolophus  | TGGTGGAGTACCACGACCGCTCCCATCCCTACATCGACCTCAGGGACCGG   | [4958] |
| Rousettus    | TGGTGGAAATACACGACGGCTCTCACGCCTACCTCGAGCTCAGGGACCGG   | [4931] |
| NycterisT    | TGGTGGAGTACCACGAGGGCTCCCACGCCTACATCCAGCTCCGGGACCGG   | [4898] |
| Nyctimene    | TGGTGGAGTATCATGACGGCTCTCACGCTTACCTCGAGCTCAGGGACCGG   | [4946] |
| Mole         | TGGTGGAGTACCACGACGGCTCCCACGCCTACCTCGGCCTTGGGACCGG    | [4952] |
| Horse        | TGGTGGAGTACCATGATGGCTCCCACGCCTACATCGAGCTCAGGGACCGG   | [4952] |
| Desmodus     | TGGTGGAGTACCATGAGGGCTCCCACCTCCTACATCCAGCTCCGGGACCGG  | [4898] |
| Rhinopoma    | ????????????????????????????????ACATCGAGCTCCGGGACCGC | [4970] |
| Emballonura  | TGGTGGAGTACCACGAGGGCTCCCACCTCCTACATCCAGCTCAGGGACCGG  | [4910] |
| Cow          | TGGTGGAGTACCATGATGGCTCCCATTCCCTACCTCGCGCTGCAAGACCGG  | [4940] |
| Pangolin     | TGGTGGAGTACCACGACGGCTCCCACGCCTACATCCAGCTCAAGGACCGG   | [4952] |
| Whale        | TGGTGGAGTACCACGACGGCTCCCACGCCTACATCGCACTGCAGGACCGG   | [4946] |

[ 5010 5020 5030 5040 5050 ]  
[ . . . . . ]

|              |                                                      |        |
|--------------|------------------------------------------------------|--------|
| Tonatia      | AAGCGGCCCTCCGAGCTGCGGGCGCATCGCCAGCCAGGTGAAGTACGCGGG  | [4939] |
| Myotis       | AAGCGGCCCTCAGAGATGCGGGCGCCTCGCCAGCCAGGTGAAGTACGCGGG  | [4978] |
| Tadarida     | AAGCGGTCCTCGGAGCTGCGGGCGCATCGTCAGCCAGGTGAAGTACGCGGG  | [4966] |
| Taphozous    | AAGCGGCCCTCCGAGCTGCGGAGCATCGCCAGCCAGGTGAAGTACGCGGG   | [4972] |
| Megaderma    | AAGCGGCCCTCCGAGCTGCGGGCGCATTGCGAGCCAGGTGAAGTATGCAGG  | [4981] |
| Cynoapterus  | AAGCGGCCCTCCGAGCTACGACGCATCACCAGCCAGGTGAAGTATGCAGG   | [4993] |
| Pteropus     | AAGCGGCCCTCCGAGCTACGGCGTATCGCCAGCCAGGTGAAGTACGCGGG   | [4978] |
| Hipposideros | AAGCGGCCCTCCGAGATACGGGCGCATCACCAGCCAGGTGAAGTATGCTGG  | [5017] |
| Cat          | AAGCGGCCCTCAGAGGTACGGGCGCATTG?CAGCCAGGTGAAGTATGCAGG  | [5020] |
| Human        | AAGCGACCGTCCGAGCTGCGGGCGCATTGCCAGCCAGGTGAAGTATGCAGG  | [5014] |
| Mouse        | AAGCGACCCCTCAGAGCTTCGGGCGCATCACCAGCCAGATTAAGTATACAGG | [4912] |
| Flyinglemur  | AAGCGGCCCTCCGAGCTGCGGGCGCATCGCTGGCCAGGTGAAGTACGCGGG  | [5023] |
| NycterisG    | AAGCGGCCCTCCGAGATGCGGGCGCATCGCCAGCCAGGTGAAGTATGCAGG  | [4924] |
| Antrozous    | AAGCGGCCCTCCGAGATGCGGGCGCCTCGCCAGCCAGGTGAGCTACGCGGG  | [4969] |
| Rhogeessa    | AAGCGGCCCTCCGAGATGCGGGCGCCTGGCCGCCAGGTAAAGTACGCGGG   | [4987] |
| Noctilio     | AAGCGGCCCTCAGAGCTGCGGGCGTATTGCCAGCCAGGTGAGGTATGTGGG  | [4975] |
| Natalus      | AAGCGGCCCTCCGAACTGCGGGCGCATCGCCAGCCAAAGTGAAGTACGCGGG | [4972] |
| Rhinolophus  | AAGCGGCCCTCCGAGCTGCGGGCGCATTGCCAGCCAGGTGAAGTACGCGGG  | [5008] |
| Rousettus    | AAGCGGCCCTCCGAGCTGCGGGCGCATCGCCAGCCAGGTGAAGTACGCGGG  | [4981] |
| NycterisT    | AAGCGACCCCTCCGAGCTGCGGGCGCATCGCCAGCCAGGTGAAGTACGCGGG | [4948] |
| Nyctimene    | AAGCGGCCCTCCGAGCTCCGGGCGTGTGCCAGCCAGGTGAAGTACGCGGG   | [4996] |
| Mole         | AAGCGGCCCTCCGAGCTGCGGGCGCATCACCAGCCAGGTGAGTACGCGGG   | [5008] |
| Horse        | AAGCGGCCCTCCGAGCTGCGGGCGCATTGCCAGCCAGGTGAAGTACGCGGG  | [5002] |
| Desmodus     | AAGCGGCCCTCCGAGCTGCGGGCGCATCGCCAGCCAGGTGAAGTATGCAGG  | [4948] |
| Rhinopoma    | AAGCGGCCCTCCGAGCTCCGGGCGCGTCCGCCAGCCAGGTGAAGTACGCGGG | [5020] |
| Emballonura  | AAGCGGCCCTCCGAGCTGCGGGCGCATCGCCAGCCAGGTGAAGTACGCGGG  | [4960] |
| Cow          | AAACGGCCATCTGAGCTTCGGGCGCATTGCCGGGCGAGGTGAAGTATGCAGG | [4990] |
| Pangolin     | AAGCGGCCCTCCGAGCTGCGGGCGCATCGCCGGCCAGGTGAAGTACGCGGG  | [5002] |
| Whale        | AAGCGGCCCTCCGAGCTGCGGGCGCATCGCTGGCCAGGTGAAGTACGCGGG  | [4996] |

[ 5060 5070 5080 5090 5100 ]  
[ . . . . . ]

|              |                                                    |        |
|--------------|----------------------------------------------------|--------|
| Tonatia      | CAGCACGGTGGCCTCCGCCACCGAGGTCTCAAGTACACGCTCTTCCAAA  | [4989] |
| Myotis       | CAGCGCAGTGGCCTCCACCAGCGAGGTTCTCAAGTACACGCTCTTCCAAA | [5028] |
| Tadarida     | CAGCGCGGTGGCCTCCACCAGTGAGGTCTCAAGTACACGCTCTTCCAAA  | [5016] |
| Taphozous    | TAGC?CAGTGGCCTCCACCAGTGAGGTCTCAAGTACACACTCTTCCAAA  | [5022] |
| Megaderma    | CAGCACGGTGGCCTCCACCAGCGAGGTCTCAAGTACACGCTCTTCCAAA  | [5031] |
| Cynoapterus  | CAGCCCCGTGGCCTCCACCAGTGAGGTCTCAAGTACACGCTCTTCCAGA  | [5043] |
| Pteropus     | CAGCTCGGTGGCCTCCACCAGTGAGGTCTCAAGTACACGCTCTTCCAAA  | [5028] |
| Hipposideros | CAGTGAGGTGGCCTCTACCAGTGAAGTCTCAAGTACACGCTCTTCCAAA  | [5067] |
| Cat          | CAGTGAGGTGGCCTCCACCAGCGAGGTCTTGAAGTACACTCTTTCCAGA  | [5070] |
| Human        | CAGCCAGGTGGCCTCCACCAGCGAGGTCTTGAAGTACACACTGTTCCAGA | [5064] |
| Mouse        | CAGCCAGGTGGCCTCTACCAGTGAGGTCTTGAAGTACACACTGTTCCAGA | [4962] |
| Flyinglemur  | CAGCCAGGTGGCCTCCCCAGTGAGGTCTTGAAGTACACGCTCTTCCAGA  | [5073] |

|             |                                                    |        |
|-------------|----------------------------------------------------|--------|
| NycterisG   | CAGCACTGTGGCCTCCACAACCTGAGGTCTCAAGTACACGCTTTTCCAAA | [4974] |
| Antrozous   | CAGCGCAGTGGCCTCCACCAGCGAGGTCTCAAGTACACGCTTTTCCAAA  | [5019] |
| Rhogeessa   | CAGCGCAGTGGCCTCCACCAGCGAGGTCTCAAGTACACGCTTTTCCAAA  | [5037] |
| Noctilio    | CAGCACGGTGGCCTCCACCAGTGGGTCTCAAGTACACACTTTTCCAAAG  | [5025] |
| Natalus     | CAGCGCAGTGGCCTCCACCAGTGGGTCTCAAGTACACGCTTTTCCAAA   | [5022] |
| Rhinolophus | CAGCGCGTGGCCTCCACCAGCGAGGTCTCAAGTACATGCTTTTCCAAA   | [5058] |
| Rousettus   | CAGCTCGGTGGCCTCCACCAGTGGGTCTCAAGTACACGCTTTTCCAAA   | [5031] |
| NycterisT   | CAGCACTGTGGCCTCCACCAGTGGGTCTCAAGTACACGCTTTTCCAAA   | [4998] |
| Nyctimene   | CAGCTCGGTGGCCTCCACCAGTGGGTCTCAAGTACACGCTTTTCCAAA   | [5046] |
| Mole        | CAGCCAGGTGGCCTCCACCAGCGAGGTCTTGAAGTACACGCTGTTCAGA  | [5058] |
| Horse       | CAGCGAAGTGGCCTCCACCAGTGGGTCTTAAAGTACACGCTGTACAAA   | [5052] |
| Desmodus    | CAGCACGGTGGCCTCCGCCACTGAGGTCTCAAGTACACGCTTTTCCAAA  | [4998] |
| Rhinopoma   | CAGCGCGTGGCCTCCGCCAGCGAGGTCTCAAGTACACGCTTTTCCAAA   | [5070] |
| Emballonura | CAGCACAGTGGCCTCCACCAGTGGGTCTCAAGTACACGCTTTTCCAAA   | [5010] |
| Cow         | CAGCGAGGTGGCTTCCACCAGCGAGGTCTTGAAGTACACGCTTTTCCAGA | [5040] |
| Pangolin    | CAGCGAGGTGGCCTCCACCAGCGAGGTCTTGAAGTACACGCTGTTCAAA  | [5052] |
| Whale       | CAGTGAGGTGGCCTCCACCAGCGAGGTCTTGAAGTACACGCTTTTCCAGA | [5046] |

[ 5110 5120 5130 5140 5150 ]  
[ . . . . . ]

|              |                                                    |        |
|--------------|----------------------------------------------------|--------|
| Tonatia      | TCTTCGGCAAGATTGACCGCCCCGAGGCCTCCCGCTTGCTCTGCTCCTG  | [5039] |
| Myotis       | TCTTCGGCAAGATCGACCGCCCCGAGGCCTCCCGCATCGCCCTGCTCCTG | [5078] |
| Tadarida     | TCTTCGGCAAGGTTGACCGCCCCGAGGCCTCCCGCATCGCCCTGCTCCTG | [5066] |
| Taphozous    | TCTTCGGCAAGATTGACCGCCCCGAGGCCTCTCGCATCGCCCTGCTCCTG | [5072] |
| Megaderma    | TCTTCGGCAAGGTCGACCGCCCCGAGGCCTCCCGCATCGCCCTGCTCCTG | [5081] |
| Cynopterus   | TCTTCGGCAAGGTCGACCGCCCCGAGGCCTCCCGCATTGCTCTGCTCCTC | [5093] |
| Pteropus     | TCTTCAGCAAGATCGACCGCCCCGAGGCCTCCCGCATTGCTCTGCTCCTC | [5078] |
| Hipposideros | TCTTCGGCAAGGTCGACCGCCCCGAGGCCTCCCGTATCGCCCTGCTCCTG | [5117] |
| Cat          | TCTTCGGTAAGATTGATCGCCCTGAAG?ATCCCCATTGCTCTGCTCCTG  | [5120] |
| Human        | TCTTCAGCAAGATCGACCGCCCTGAAGCCTCCCGCATCGCCCTGCTCCTG | [5114] |
| Mouse        | TCTTCGGCAAAATTGACCGCCCTGAAGCCTCCCATATCACTCTGCTCCTG | [5012] |
| Flyinglemur  | TCTTCGGCAAGATCGACCGCCCCGAGGCCTCCCGAATTGCTCTGCTCCTG | [5123] |
| NycterisG    | TCTTCGGCAAGACTGACCGCCCTGAGGCCTCCCGCATTGCTCTGCTCCTG | [5024] |
| Antrozous    | TCTTCAGCAAGATCGACCGCCCCGAGGCCTCCCGCATCGCTCTGCTCCTG | [5069] |
| Rhogeessa    | TCTTCGGCAAGATCGACCGCCCCGAGGCCTCCCGCATCGCCCTGCTCCTG | [5087] |
| Noctilio     | TCTTCGGCAAGGTCGACCGCCCTGAGGCCTCCCGCATTGCTCTGCTCCTG | [5075] |
| Natalus      | TCTTCAACAAGGTCGACCGCCCCGAGGCCTCCCGCATTGCTCTACTCCTG | [5072] |
| Rhinolophus  | TCTTCAGCAAGGTCGACCGCCCCGAGGCCTCCCGCATCGCCCTGCTCCTG | [5108] |
| Rousettus    | TCTTCAGCAAGGTCGACCGCCCCGAGGCCTCCCGCATTGCTCTACTCCTC | [5081] |
| NycterisT    | TCTTCGGCAAGACTGACCGCCCTGAGGCCTCCCGCATTGCTCTGCTCCTG | [5048] |
| Nyctimene    | TCTTCGGCAAGGTCGACCGCCCCGAGGCCTCCCGCTTGTCTCTGCTCCTC | [5096] |
| Mole         | TCTTCAGCAAGGTCGACCGCCCCGAGGCCTCCCGCTCGCCCTGCTGCTG  | [5108] |
| Horse        | TCTTCGGCAAGATTGACCGCCGAGAAGCCTCTCGCATCGCCCTGCTCCTG | [5102] |
| Desmodus     | TCTTCGGCAAGGTCGACCGCCCCGAGGCCTCCCGCATTGCTCTGCTCCTG | [5048] |
| Rhinopoma    | TCTTCGGCAAGGTCGACCGCCCCGAGGCCTCCCGCATCGCCCTGCTCCTG | [5120] |
| Emballonura  | TCTTCAGCAAGATTGACCGCCCCGAGGCCTCCCGCATCGCCCTGCTCCTG | [5060] |
| Cow          | TCTTCGGCAGGATTGACCGCCCTGAGGCCTCTCGCTGGCCCTGCTGCTT  | [5090] |
| Pangolin     | TCTTCGGCAAGGTCGACCGCCCCGAGGCCTCCCGCATTGCTCTGCTCCTG | [5102] |
| Whale        | TTTTCAGCAAGATTGACCGCCCTGAGGCCTCCCGCTGGCCCTGCTGCTG  | [5096] |

[ 5160 5170 5180 5190 5200 ]  
[ . . . . . ]

|              |                                                      |        |
|--------------|------------------------------------------------------|--------|
| Tonatia      | ACGGCCAGCCAGGAACCCCCGAGGATGGCCCCGAACTTGGCCCGTTACGT   | [5089] |
| Myotis       | ACGGCCAGCCAGGAGCCCCAGAAGTTGGGCCGGAACCTGGTCCGCTACGT   | [5128] |
| Tadarida     | TCGGCCAGCCAGGAGCCCCGAAGTTGGCCAAGAACTTGGTCCGCTACGT    | [5116] |
| Taphozous    | ACGGCCAGCCAGGAGCCCCAGCGGTTGGCCCCGAAACTTGGTCCGCTACGT  | [5122] |
| Megaderma    | ACGGCCAGCCAGGAGCCTCCGAAGCTGTCCCGGAACCTGGTCCGCTATGT   | [5131] |
| Cynopterus   | ACAGCCAGCCAGGAGCCCCGAAGCTGGCCCCGGAACCTGGTCCGCTATGT   | [5143] |
| Pteropus     | ACGGCCAGCCAGGAGCCCCGAAGCTGGCCCCGGAACCTGGTCCGCTATGT   | [5128] |
| Hipposideros | ATGGCCAGCCAGGAGCCCCAAGTTGGCCAGGAACCTGGTCCGCTATGT     | [5167] |
| Cat          | ATGGCCACCCAGGAGCCCCAGAGGCTGGACCGGAATTTGGTCCGCTACGT   | [5170] |
| Human        | ATGGCCAGCCAGGAGCCCCAAGGATGTCGGGAACCTTTGTCCGCTACGT    | [5164] |
| Mouse        | ACTGCTAGCCAGGAGCCCCACGGATGGCTAGGAATTTGGTCCGCTATGT    | [5062] |
| Flyinglemur  | ACGGCCAGCCAGGAGCCACCCCGGTTGGCCCCGGAACCTGGTCCGCTCCGT  | [5173] |
| NycterisG    | ACAGCCAGTGAGGAGTCTCCGAAGTTCTCGTCCGGAGTTTGGTCCGCTATGT | [5074] |
| Antrozous    | ACGGCCAGCCAGGAGCCCCAGAAGTTGGGCCGGAACCTGGTCCGCTACGT   | [5119] |
| Rhogeessa    | ACGGCCAGCCAGGAGCCCCAGAAGTTGGGCCGGAACCTGGTCCGCTACGT   | [5137] |
| Noctilio     | ACAGCCAGCCAGGAGCCCCAAGTTGACCCGGAACCTGGTCCGCTATGT     | [5125] |
| Natalus      | ACGGCCAGCCAGGAGCCCCAAGTTGGGCCGGAACCTGGTCCGCTACGT     | [5122] |
| Rhinolophus  | ATGGCCAGCCAGGAGCCTCCAAAGTTGGCCCCGGAACCTGGTCCGCTACGT  | [5158] |
| Rousettus    | ATGGCCAGCCAGGAGCCCCGAAGCTGGCCCCGGAACCTGGTCCGCTATGT   | [5131] |

|             |                                                    |        |
|-------------|----------------------------------------------------|--------|
| NycterisT   | ACAGCCAGTGAGGAGTCCCCGAAGCTCGTCCGGAGTTGGTCCGCTACGT  | [5098] |
| Nyctimene   | ACGGCCAGCCAGGAGCCCCCGAAGCTGGCCCGGAACCTGGTCCGCTATGT | [5146] |
| Mole        | ACGGCCAGCCAGGAGCCCCCGCATGGCCCGGAACCTGGTCCGCTACGT   | [5158] |
| Horse       | ATGGCCAGTCAGGAGCCCCGAGGTTGGCCCGGAACCTGGTCAACTACGT  | [5152] |
| Desmodus    | ACGGCCAGCCAGGAGCCCCAGAGGATGGCCCGGAACCTGGCCCGTTACGT | [5098] |
| Rhinopoma   | ACGGCCAGCCAGGAGCCCCGAAGTTGGCCCGGAACCTGGTCCGCTACGT  | [5170] |
| Emballonura | ACGGCCAGCCAGGAGCCCCGAAGTTGTCCCGGAACCTGGTCCGCTACGT  | [5110] |
| Cow         | ACGGCCAGCCAGGAACCCCCAGGCTGGCCCGGAACCTGGTCCGCTACGT  | [5140] |
| Pangolin    | ACGGCCAGCCAGGAGCCCCGAGGTTGGCCCGGAACCTGGTCCGCTACGT  | [5152] |
| Whale       | ACGGCCAGCCAGGAGCCCCAGGCTGGCCCGGAACCTGGTCCGCTACGT   | [5146] |

[ 5210 5220 5230 5240 5250 ]  
[ . . . . . ]

|              |                                                   |        |
|--------------|---------------------------------------------------|--------|
| Tonatia      | CCAGGGCCTGAAGAAGAAGAAG--GTCATCGTGGTCCCAGTGGGCATTG | [5136] |
| Myotis       | CCAGGGCCTGAAGAAGAAGAAG--GTCATCGTGGTCCCAGTGGGCATTG | [5175] |
| Tadarida     | CCAGGGCCTGAAGAAGAAGAAG--GTCATCGTGGTCCCAGTGGGCATTG | [5163] |
| Taphozous    | CCAGGGCCTGAAGAAGAAGAAG--GTCATTATGATCCCAGTGGGCATTG | [5169] |
| Megaderma    | CCAGGGCCTG?AGAAGAAGAAG--GTCATCGTGGTCCCAGTGGGCATTG | [5178] |
| Cynopterus   | CCAGGGCCTGAAGAAGAAGAAG--GTCATCGTGGTCCCAGTGGGCATTG | [5190] |
| Pteropus     | CCAGGGCCTGAAGAAGAAGAAG--GTCATCGTGGTCCCAGTGGGCATTG | [5175] |
| Hipposideros | CCAGGGCCTGAAGAAGAAGAAG--GTCATCGTGGTCCCAGTGGGCATTG | [5214] |
| Cat          | TCAGGGGCTGAAGAAGAAGATA--GTCATCATGATCCCAGTGGGCATTG | [5217] |
| Human        | CCAGGGCCTGAAGAAGAAGAAG--GTCATTGTGATCCCAGTGGGCATTG | [5211] |
| Mouse        | CCAAGGTCTGAAGAAGAAGAAG--GTTATCGTGGTCCCAGTGGGCATTG | [5109] |
| Flyinglemur  | CCAGGGCCTGAAGAAGAAGAAG--GTCATTGTGATCCCAGTGGGCATTG | [5220] |
| NycterisG    | CCAGGGCCTGAAGAAGAAGAAG--GTCATCGTGGTCCCAGTGGGCATTG | [5121] |
| Antrozous    | CCAGGGCCTGAAGAAGAAGAAG--GTCATCGTGGTCCCAGTGGGCATTG | [5166] |
| Rhogeessa    | CCAGGGCCTGAAGAAGAAGAAG--GTCATCGTGGTCCCAGTGGGCATTG | [5184] |
| Noctilio     | CCAGGGCCTCAAGAAGAAGAAG--GTCATTGTGGTCCCAGTGGGCATTG | [5172] |
| Natalus      | CCAGGGCCTGAAGAAGAAGAAG--GTCATCGTGGTCCCAGTGGGCATTG | [5169] |
| Rhinolophus  | CCAGGGCCTGAAGAAGAAGAAG--GTCATCGTGGTCCCAGTGGGCATTG | [5205] |
| Rousettus    | CCAGGGCCTAAGAAGAAGAAG--GTCACCGTGGTCCCAGTGGGCATTG  | [5178] |
| NycterisT    | CCAGGGCCTGAAGAAGAAGAAG--GTCATCGTGGTCCCAGTGGGCATTG | [5145] |
| Nyctimene    | CCAGGGCCTGAAGAAGAAGAAG--GTCACCGTGGTCCCAGTGGGCATTG | [5193] |
| Mole         | CCAGGGCCTGAAGAAGAAAAG--GTCATCGTGGTCCCAGTGGGCATTG  | [5205] |
| Horse        | CCAGGGCCTGAAGAAGAAGAAG--GTCACCGTGGTCCCAGTGGGCATTG | [5202] |
| Desmodus     | CCAGGGCCTGAAGAAGAAGAAG--GTCACCGTGGTCCCAGTGGGCATTG | [5145] |
| Rhinopoma    | CCAGGGCCTCAAGAAGAAGAAG--GTCACCGTGGTCCCAGTGGGCATTG | [5217] |
| Emballonura  | CCAGGGTCTGAAGAAGAAGAAG--GTCATTGTGATCCCAGTGGGCATTG | [5157] |
| Cow          | CCAGGGCCTGAAGAAGAAGAAG--GTCATCGTGGTCCCAGTGGGCATTG | [5187] |
| Pangolin     | GCAGGGCCTGAAGAAGAAGAAG--GTCATCGTGGTCCCAGTGGGCATTG | [5199] |
| Whale        | CCAGGGCCTGAAGAAGAAGAAG--GTCATCGTGGTCCCAGTGGGCATTG | [5193] |

[ 5260 5270 5280 5290 5300 ]  
[ . . . . . ]

|              |                                                   |        |
|--------------|---------------------------------------------------|--------|
| Tonatia      | GGCCCCAGCTGAACCTCAAGCAGATCCSCCTCATCGAGAAGCAGGTCCT | [5186] |
| Myotis       | GGCCTCAGCCAACTCAAGCAGATCCGCTCATCGAGAAGCAGGGCCCC   | [5225] |
| Tadarida     | GGCCCCAGCTCAACCTCAGGCAGATCCGCTCATCGAGAAGCAGGCCCT  | [5213] |
| Taphozous    | GGCCCCATGCCAACCTCAGGCAGATCCGCTCATCGAGAAGCAGGCCCT  | [5219] |
| Megaderma    | GGCCCCAGCCAGCCTCAAGCAGATCCGCTCATCGAGAAGCAGGCCCT   | [5228] |
| Cynopterus   | GGCCCCATGCCAACCTCAAGCAGATCCGCTCATCGAGAAGCAGGCCCT  | [5240] |
| Pteropus     | GGCCCCAGCCAACTCAAGCAGATCCGCTCATCGAGAAGCAGGCCCT    | [5225] |
| Hipposideros | GGCCCCAGCTCAACCTCAGGCAGATCCGCTCATCGAGAAGCAGGCCCT  | [5264] |
| Cat          | GGCTCCATGCCAACCTCAAGCAGATCCAC????????????????     | [5267] |
| Human        | GGCCCCATGCCAACCTCAAGCAGATCCGCTCATCGAGAAGCAGGCCCT  | [5261] |
| Mouse        | GGCCCCAGCCGACCTCAAGCAGATCCGCTCATCGAGAAGCAGGCCCT   | [5159] |
| Flyinglemur  | GGCCCCATGCCAGCCTTAAGCAGATCCGCTCATCGAGAATCAGGCCCT  | [5270] |
| NycterisG    | GGCCCCACCAACCTCAGGCAGATCCACCTATTGAGAAGCAGGCCCT    | [5171] |
| Antrozous    | GGCCGCACGCCAACCTCAAGCAGATCCGCTCATCGAGAAACAGGCCCT  | [5216] |
| Rhogeessa    | GGCCGCACGCCAACCTCAAGCAGATCCGCTCATCGAGAAGCAGGCCCT  | [5234] |
| Noctilio     | GGCCCCATGCCAATCTGAAGCAGATCCACTTAATTGAGAAGCAGGCCCT | [5222] |
| Natalus      | GGCCTCATGCCAACCTCAGGCAGATCCGCTCATCGAGAAGCAGGCCCT  | [5219] |
| Rhinolophus  | GGCCCCACATTAACCTCAAGCAGATCCGCTCATCGAGAAGCAGGCCCT  | [5255] |
| Rousettus    | GGCCCCAGCCAACTCAAGCAGATCCGCTCATCGAGAAGCAGGCCCT    | [5228] |
| NycterisT    | GGCCCCACCAACCTCAGGCAGATCCGCTCATCGAGAAGCAGGCCCT    | [5195] |
| Nyctimene    | GGCCCCATGCCAACCTCAAGCAGATCCGCTCATCGAGAAGCAGGCCCT  | [5243] |
| Mole         | GGCCCCAGCCAACTCAAGCAGATCC?CTCATCGAGAAGCAGGCCCT    | [5255] |
| Horse        | GGCCCCATGCCAATGTATACAGATCCGCTCATCGAGAAGCAGGCCCT   | [5252] |
| Desmodus     | GGCCACAGTGAACCTCAGGCAGATCCACCTCATCGAGAAGCAGGCCCT  | [5195] |
| Rhinopoma    | GGCCCCAGCCAGCCTCAGGCAGATCCGCTCATCGAGAAGCAGGCCCT   | [5267] |
| Emballonura  | GGCCCCAGCCAACTCAGGCAGATCCACCTATTGAGAAGCAGGCCCT    | [5207] |



|          |                                                   |          |
|----------|---------------------------------------------------|----------|
| Cow      | GGCCCCAGCCAGCCTCAAGCAGATCCGCCTCATTGAGAAGCAGGCACCT | [ 5237 ] |
| Pangolin | GGCCCCAGCCAACCTCAAGCAGATCCGCCTCATTGAGAAGCAGGCCCT  | [ 5249 ] |
| Whale    | GGCCCCAGCCAGCCTCAGGCAGATCCGCCTCATCGAGAAGCAGGCCCC  | [ 5243 ] |

|   |      |      |      |      |       |
|---|------|------|------|------|-------|
| [ | 5310 | 5320 | 5330 | 5340 | 5350] |
| [ | .    | .    | .    | .    | .]    |

|              |                                                      |          |
|--------------|------------------------------------------------------|----------|
| Tonatia      | GAGAACAAGGCCTTTGTGATCAGCAGTGTGGACGAGCTGGAGCAGCGAAG   | [ 5236 ] |
| Myotis       | GAGAACAAGGCCTTTGTGCTCAGCAGCGTGGACGAGCTGGAGCAGCAAAG   | [ 5275 ] |
| Tadarida     | GAGAACAAGGCCTTTGTGCTCAGCAGTGTGGACGAGCTGGAGCAGCTGAG   | [ 5263 ] |
| Taphozous    | GAGAACAAGGCCTTTGTGCTCAGCAGTGTGGACGAGCTGGAGCAGCGGAG   | [ 5269 ] |
| Megaderma    | ?????????TTCATGGTCAGCGGCGTGGACGAGTTGGAGCAGCGCAG      | [ 5278 ] |
| Cynoapterus  | GAGAACAAGGCCTTTGTGCTCAGTGGTGTGGACGAGCTGGAGCAACGGAG   | [ 5290 ] |
| Pteropus     | GAGAACAAGGCCTTTGTGCTCAGTGGTGTGGACGAGCTGGAGCAGCGGAG   | [ 5275 ] |
| Hipposideros | GAGAACAAGGCCTTTGTGCTCAGTGGCGTGGATGAGCTGGAGCAGCGAAG   | [ 5314 ] |
| Cat          | ????????????????????AGTGGTGTGGACGATCTGGACCACCAAAG    | [ 5317 ] |
| Human        | GAGAACAAGGCCTTTGTGCTCAGCAGTGTGGATGAGCTGGAGCAGCAAAG   | [ 5311 ] |
| Mouse        | GAGAACAAGGCCTTTGTGCTCAGTGGGTGGATGAGCTGGAGCAGAGAAG    | [ 5209 ] |
| Flyinglemur  | GAGAACAAGGCCTTTGTGCTCAGCAGCGTGGATGAACTGGAGCAGCGAAG   | [ 5320 ] |
| NycterisG    | GAGAACAAGGCCTTTGTGCTCAGCAGTGTGGATGAGCTGAAGCAGCGCAG   | [ 5221 ] |
| Antrozous    | GAGAACAAGGCCTTTGTGCTCAGCAGTGTGGACGAGCTGGAGCAGCGAAG   | [ 5266 ] |
| Rhogeessa    | GAGAACAAGGCCTTTGTGCTCAGCAGTGTGGACGAGCTGGAGCAGCGAAG   | [ 5284 ] |
| Noctilio     | GAGAACAAGGCCTTTGTGCTCAGCAGTGTGGATGAGCTGGAGCAGCGAAG   | [ 5272 ] |
| Natalus      | GAGAACAAGGCCTTTGTGCTCAGCAGTGTGGATGAGCTGGAACAGCAAAG   | [ 5269 ] |
| Rhinolophus  | GAGAATAAGGCCTTTGTGCTCAGCGGCGTGGATGAGCTGGAGCAACGAAG   | [ 5305 ] |
| Rousettus    | GGAGAACAAGGCCTTTGTGCTCAGTGGTGTGGACGAGCTGGAGCAGCGGAG  | [ 5278 ] |
| NycterisT    | GAGAACAAGGCCTTTGTGCTCAGCAGTGTGGATGAGCT????????????   | [ 5245 ] |
| Nyctimene    | GAGAACAAGGCCTTTGTGCTCAGTGGTGTGGACGAGCTGGAGCAGCGGAG   | [ 5293 ] |
| Mole         | GAGAACAAGGCCTTTGTGTTTACAGCAGCGTGGCGGAGCTGCAGCGGCACAG | [ 5305 ] |
| Horse        | GAGAACAAGGCCTTTCTCCTCAGTGGTGTGGACGAGCTGGAGCAGCGAAG   | [ 5302 ] |
| Desmodus     | GAGAACAAGGCCTTTGTGCTCAGCAGTGTGGACGAGCT??GCAGCGAAG    | [ 5245 ] |
| Rhinopoma    | GAGAACAAGGCCTTTGTGCTCAGCGGCGTGGATGAGCTGGAGCAGCGCAG   | [ 5317 ] |
| Emballonura  | GAGAACAAGGCCTTTGTGCTCAGCAGTGTGGATGAGCTGGAGCAGCGGAG   | [ 5257 ] |
| Cow          | GAGAACAAGGCCTTTGTGCTAAGTGGCGTGCACGAGCTGGAGCAGCGGAT   | [ 5287 ] |
| Pangolin     | GAGAACAAGGCCTTTGTGCTCAGCAGTGTGGACGAGCTGGAGCAGTGGAG   | [ 5299 ] |
| Whale        | GAGAACAAGGCCTTTGTGCTCAGCAGTGTGGAGGAGCTGGAGCAGCAGAG   | [ 5293 ] |

|   |      |      |      |      |       |
|---|------|------|------|------|-------|
| [ | 5360 | 5370 | 5380 | 5390 | 5400] |
| [ | .    | .    | .    | .    | .]    |

|              |                                                      |          |
|--------------|------------------------------------------------------|----------|
| Tonatia      | GGACGAGATTATCAGCTACCTCTGTGACCTTGTCCCGAAGTGCAGCGCAC   | [ 5286 ] |
| Myotis       | GGACGAGATTATCAACTACCTCTGTGACCTCGCGCCCGAGGCTCCGGCCC   | [ 5325 ] |
| Tadarida     | GGACGAGATCACCAGCTACCTCTGTGACCTTGTCCCGAAGCGCCTGCCC    | [ 5313 ] |
| Taphozous    | GGACGAGATTATCAGCTACCTCTGTGACCTTGTCCCGAAGTGCCTGCCC    | [ 5319 ] |
| Megaderma    | GGACGAGATCATCAACTACCTTGTGACCTTGTCCCGAAGCGCCTGCCC     | [ 5328 ] |
| Cynoapterus  | GGACGAGATCATCAACTACCTCTGTGACCTTGTCCCGAAGCGCCTGCCC    | [ 5340 ] |
| Pteropus     | GGACGAGATTATCAGCTACCTCTGTGACCTTGTCCCGAAGTGCCTGCCC    | [ 5325 ] |
| Hipposideros | GGATGAGATTATCAGCTACCTCTGTGACCTTGTCCCGAAGCGCCTGCCC    | [ 5364 ] |
| Cat          | GGATAAAATTATCAACTACCTCTGTGACCTTGTCCCGAAGCGCCTGCCC    | [ 5367 ] |
| Human        | GGACGAGATCGTTAGCTACCTCTGTGACCTTGTCCCGAAGCGCCTCCTC    | [ 5361 ] |
| Mouse        | AGATGAGATAGTCAGCTACCTCTGTGACCTTGTCCCGAAGCGCCTGCCC    | [ 5259 ] |
| Flyinglemur  | GGACGAGATTATCAGCTACCTCTGTGACCTTGTCCCGAAGCGCCTGCCC    | [ 5370 ] |
| NycterisG    | GGACGAGATTATCAGCTACTTCTGTGACCTTGTCCCGAAGCGCCTGCCC    | [ 5271 ] |
| Antrozous    | GGACGAGATTATCAACTACCTCTGTGATCTGCGCCCGAGGCGCCGGCC     | [ 5316 ] |
| Rhogeessa    | GGACGAGATTATCAGCTACCTCTGTGACCTGCGCCCGAGCCACCGGCC     | [ 5334 ] |
| Noctilio     | GGATGAGATTATCAGCTACCTCTGTGATCTTGTCTCCTGAAGTGCCTGCCC  | [ 5322 ] |
| Natalus      | GGACGAGATTATCAGCTACCTATGCGACCTTGTCCCGAAGCACCGGCC     | [ 5319 ] |
| Rhinolophus  | GGATGAGATTATCAGCTACCTCTGTGACCTTGTCCCGAAGCTCCTGCCC    | [ 5355 ] |
| Rousettus    | GGACGAGATTATCAGCTACCTCTGTGACCTGCGCCCTAAAGCGCCTGCCC   | [ 5328 ] |
| NycterisT    | ???????????????????????????????????????????????????? | [ 5295 ] |
| Nyctimene    | GGACGAGATTATCGGCTACCTCTGTGACCTTGTCCCGAAGCGCCTGCCC    | [ 5343 ] |
| Mole         | GGACGACATCATCAGCCACCTCTGCGACCTGCGCCCGACGCGCCGGCCC    | [ 5355 ] |
| Horse        | GGACGACATTATCAGTTACCTCTGTGACCTTGTCCCGAAGCACCTGCCC    | [ 5352 ] |
| Desmodus     | GGACGAGATTATCAGCTACCTCTGTGACCTTGTCCCGAAGCGCGCAC      | [ 5295 ] |
| Rhinopoma    | GGACGAGATCATCAGCTACCTCTGTGACCTGGTCCCGAAGCGCCCGCCC    | [ 5367 ] |
| Emballonura  | GGACGAGATGATCAGCTACCTCTGTGACCTGCGCCCGAAGCACCTGCCC    | [ 5307 ] |
| Cow          | GGACGATATTGTGCGCTACCTCTGCGACCTGCGCCCTCGAGGTGCCTGCCC  | [ 5337 ] |
| Pangolin     | GGACGAGATAATCAACTACCTCTGTGACCTTGTCCCGAAGCTCCCGCCC    | [ 5349 ] |
| Whale        | GGACGAGATCATCAGCTACCTCTGCGACCTGCGCCCGAAGCGCCGGCCC    | [ 5343 ] |

|   |      |      |      |      |       |
|---|------|------|------|------|-------|
| [ | 5410 | 5420 | 5430 | 5440 | 5450] |
| [ | .    | .    | .    | .    | .]    |

|              |                                                    |        |
|--------------|----------------------------------------------------|--------|
| Tonatia      | CTACGCAGTCCC-----CGCCTAT---GGCACAAGTCACTGTGGGTCCA  | [5327] |
| Myotis       | CGACTCAGCCCC-----CTCCTAT---GGCCCAAGTCACCGTGGGTCCG  | [5366] |
| Tadarida     | CTACCCAGGCC-----CTCCTGT---GGCACGAGTCACAGTGGGTCCA   | [5354] |
| Taphozous    | CTACGCAGCCCC-----CTCCTAT---GGCACAAGTCACTGTGGC----  | [5356] |
| Megaderma    | CCACTCGGCC-----CGCCTGT---GGCCCAAGTCACTGTGGGTCCG    | [5369] |
| Cynoptyrus   | CTACTCAGCCCC-----CACCTAT---GGCCCAAGTCACCGTGGGGCCG  | [5381] |
| Pteropus     | CTACTCAGCCCC-----CACCTGT---GGCCCAAGTCACCATGGGTCCA  | [5366] |
| Hipposideros | CCACGCAGCCTC-----CCCCTAT---GGCACAAGTCACTGTGGGTCCG  | [5405] |
| Cat          | CTACCCAGCATC-----CCCCTAT---GGTACCAGTCACTGTGGGTCCA  | [5408] |
| Human        | CTACTCTGCC-----CCCACAT---GGCACAAGTCACTGTGGGCCCG    | [5402] |
| Mouse        | CAACTCAGCCTC-----CACAGGT---AGCCACGTCACCGTGAGTCCA   | [5300] |
| Flyinglemur  | CCAGGCAGTCCC-----CCAACAT---GGCACAGGTCACTGTGGGTCCA  | [5411] |
| NycterisG    | CTACCCAGCCCC-----CTCCTAT---GGCACAAGTCACTGTGGGTCCA  | [5312] |
| Antrozous    | CGACTCAGGCC-----CTCCTAT---GGCCCAAGTCACCGTGGGGCCA   | [5357] |
| Rhogeessa    | CAACTCAGCCCC-----CTCCTAT---GGCCCAAGTCACCGTGGGTCC   | [5375] |
| Noctilio     | CTACACAGCCCC-----CTCCCAT---GGCACAGGTCACTGTGGGTCCG  | [5363] |
| Natalus      | CTACTCAGCCTC-----CTCCTAT---GGCAAAAGTTACCGTGAGTCCA  | [5360] |
| Rhinolophus  | CCACTCAGTTAC-----CCCCTGT---GGCAGAAGTCACTGTGGGTCTG  | [5396] |
| Rousettus    | CTACTCAGCCCC-----CACCTGT---GGCCCAAGTCACCGTGGGTCCG  | [5369] |
| NycterisT    | ?????AGCCCC-----CGCCTAT---GGCACAAGTCACCGTGGGCCCG   | [5336] |
| Nyctimene    | CTACTCAGCCCC-----CACCTGT---GGCCCAAGTCACCGTGGGTCCG  | [5384] |
| Mole         | CCACCCGGCCCC-----CGCCCAT---AGTCAAGTCACCGTGGGGCCA   | [5396] |
| Horse        | CTACTCAGCGCC-----CCCGTAT---GCCACAAGTCACCATGAGTCCA  | [5393] |
| Desmodus     | CTACTCAACCCC-----CTCCTGT---GGCACGAGTCACTGTGGGTCCA  | [5336] |
| Rhinopoma    | CGACGCCCCCGC-----CTAT---GGCACAAGTCACTGTGGGTCCG     | [5405] |
| Emballonura  | CTACACAGCCCC-----CGCCTGT---GGCACAAGTCACTGTGGG----  | [5344] |
| Cow          | CGACCCTGACGCAACATCCCCTCGC---CGCACAGGTCACTGTGGGCCCG | [5384] |
| Pangolin     | CTACTCAGCCTC-----CCCCTGT---GGCACAAGTCACCGTGGGCCCG  | [5390] |
| Whale        | TCACGCAGC-----GCCCCTCACGGCCAGGTCAACCGTGGGCCCG      | [5384] |

[ 5460 5470 5480 5490 5500 ]  
[ . . . . . ]

|              |                                                     |        |
|--------------|-----------------------------------------------------|--------|
| Tonatia      | GAGCACCTGGGGCGTTCATCCCTGGGGCCCAAGCGGAACTCCATGGTTCT  | [5377] |
| Myotis       | GAGCACTTGGGGGTTTCGACGCTGGGGCCCAAGAGGAACTCCATGGTTCT  | [5416] |
| Tadarida     | GAGCACACGGGGGTTTCACGCTGGGACCCAAGAGGAACTCCATGGTTCT   | [5404] |
| Taphozous    | --GCACCTGGGGGTTTCGTCCTGGGACCCAAGAGGAACTCCATGGTTCT   | [5404] |
| Megaderma    | GAGCACTTAGGGGTTTCGACCTTGGGACCCAGGAGGAACTCCATGGTTCT  | [5419] |
| Cynoptyrus   | GAGCTCTTGGGGATTTTGTCCACGGACCCAAGAGAACTCCATGGTTCT    | [5431] |
| Pteropus     | GAGCTCTTGGGGGTTTGTCCGAGGGACCCAAGAGAACTCCATGGTTCT    | [5416] |
| Hipposideros | GAGCACTTGGGGGTTTCGACCTTGGGACCCAAGAGGAACTCCATGGTTCT  | [5455] |
| Cat          | GGGCTCATGGGGGTTTCATCCTCGGGACCC?AAAGGAAACCCACAGTTCT  | [5458] |
| Human        | GGGCTCTTGGGGGTTTCGACCTTGGGGCCCAAGAGGAACTCCATGGTTCT  | [5452] |
| Mouse        | GGGATCGCTGGGACTCTGTACCCGGGACCAAAACGGAAGTCCATGGTTCT  | [5350] |
| Flyinglemur  | GGGCCCTTGGGGGTTTCACCGTTAGGACCCAGTAGGAGCTCCATGGTTCT  | [5461] |
| NycterisG    | GAGCACTTGGGGGCTTCGACTCTGGGACCCAGAGGAACTCCATGGTTCT   | [5362] |
| Antrozous    | GAGCACTTGGGGGTTTCACGCTGGGACCTAAGAGGAACTCCATGGTTCT   | [5407] |
| Rhogeessa    | GAGCACTTGGGGGTTTCACGCGAGGGACCCAAGAGGAACTCCATGGTTCT  | [5425] |
| Noctilio     | GAGCACTTGGGGGTTTCGACCTTGGGACCCAAGAGGAACTCCATGGTTCT  | [5413] |
| Natalus      | GAGCACTTGGGGGTTTCGACGCTGGGACCCAAGAGGAACTCCATGGTTT   | [5410] |
| Rhinolophus  | GAGCACTTGGGGGTTTCGACCTTGGGACCCAAGAGGAACTCCATGGTTCT  | [5446] |
| Rousettus    | GAGCTCTTGGGGGTTTGTCCAGGGACCCAAGAGAACTCCATGGTTCT     | [5419] |
| NycterisT    | GATCAGTGGGGCTTTCGACCTTGGGACCCCGAGGAACTCCATGGTTCT    | [5386] |
| Nyctimene    | GAGCTCTTGGGGGTTCTGTCCAGGGACCCAAGAGAACTCCATGGTTCT    | [5434] |
| Mole         | GAGCTCCTGGGGGTTTCGGCCCCGGGCCCAAGCGGAACTCCTTGGTTCT   | [5446] |
| Horse        | GAGCACTCAGTAACCTCGTCACTGGCACCCAAGAGGAACTCCATGGTTCT  | [5443] |
| Desmodus     | GAGCACCTGGAGGTTTCGTACCTGGGGCCCAAGAGGAACTCCATGGTTCT  | [5386] |
| Rhinopoma    | GAGCACTCGGGGGTTTCGTCCTCCCGGGACCCAAGCGAACTCCATGGTTCT | [5455] |
| Emballonura  | --GCACCTGGGGGTTTCGTCCTTGGGACCCAAGAGGAACTCCATGGTTCT  | [5392] |
| Cow          | CAGCTCCTGGGTCTTCGCTGCGGGACCCAAGAGGAGCTCTGTGTCTCT    | [5434] |
| Pangolin     | GAAGTCGTGGGGTCTCATACCCGGGACCCAGAGGAGATCCATGGTTCT    | [5440] |
| Whale        | GAGTCCCGGGACGTCGACGCTGGCACCCAAGAGGAACTCCGTGGTTCT    | [5434] |

[ 5510 5520 5530 5540 5550 ]  
[ . . . . . ]

|            |                                                     |        |
|------------|-----------------------------------------------------|--------|
| Tonatia    | GGATGTGGTGTTTTGTCTGGAAGGGTCGGACCAAAATCGGCGAGGCCAACT | [5427] |
| Myotis     | GGATGTGGTGTTTTGTCTGGAAGGGTCGGACCAAAATCGGGGAGGCCAACT | [5466] |
| Tadarida   | GGATGTGGTGTTTTGTCTGGAAGGGTCAGACCAAGTCGGCGAGGCCAACT  | [5454] |
| Taphozous  | GGATGTGGTGTTTATTCTGGAAGGGTCGGACCAAAATGGCGAGGCCAACT  | [5454] |
| Megaderma  | GGACGTGGTGTTTTGTCTGGAAGGGTCGGATCAAATGGCGAGGCCAACT   | [5469] |
| Cynoptyrus | GGACGTGGTGTTTTGTCTGGAAGGGTCGGACCAAAATCGGCGAGGCCAACT | [5481] |
| Pteropus   | GGACGTGGTGTTTTGTCTGGAAGGGTCGGACCAAAATCGGCGAGGCCAACT | [5466] |

|              |                                                     |        |
|--------------|-----------------------------------------------------|--------|
| Hipposideros | GGACGTGGTGTGTTGTTCTGGAAGGGTCGGACGCCATTGGCGAGGCCAACT | [5505] |
| Cat          | GGACGTGGTGTGTTGTCCTGGAAGGGTCCGACAAAATTGGTGAGGCCAACT | [5508] |
| Human        | GGATGTGGCGTTTCCTGGAAGGATCGGACAAAATTGGTGAAGCCGACT    | [5502] |
| Mouse        | GGATGTGGTGTGTTGTCCTGGAGGGTCAGACGAAGTTGGTGAAGCCAACT  | [5400] |
| Flyinglemur  | GGACGTAGTGTGTTGTCCTGGAAGGGTCGGACAAAATCGGTGAGGCCGACT | [5511] |
| NycterisG    | GGATGTGGTGTGTTCTTCTGGAAGGATCAGACCAAATGGCGAGGCCAACT  | [5412] |
| Antrozous    | GGATGTGGTGTGTTGTTCTGGAAGGATCGGACAAAATCGGCGAGGCCAACT | [5457] |
| Rhogeessa    | TGATGTGGTGTGTTGTTCTGGAAGGGTCGGACCAAATCGGTGAGGCCAACT | [5475] |
| Noctilio     | GGATGTGGTGTGTTGTTCTGGAAGGGTCAGATGAAATGGTGAGGCCAATT  | [5463] |
| Natalus      | GGATGTGGTGTGTTGTTCTGGAAGGGTCAGACCAAATCGGCGAGGCCAACT | [5460] |
| Rhinolophus  | GGATGTGGTGTGTTGTTCTGGAAGGGTCGGACGCCATTGGTGAGGCCAACT | [5496] |
| Rousettus    | GGACGTGGTGTGTTATTCTGGAGGGTCAGACAAAATCGGCGAGGCCAATT  | [5469] |
| NycterisT    | GGATGTGGTGTGTTCTTCTGGAAGGATCAGACCAAGTTGGYGAGGCCAACT | [5436] |
| Nyctimene    | GGACGTGGTGTGTTCTTCTGGAAGGGTCAGACAAAATCGGTGAGGCCAACT | [5484] |
| Mole         | GGATGTGGTGTGTTGTTCTGGAAGGCTCGGACAGCATCGGCGAGGCCAACT | [5496] |
| Horse        | GGATGTGGTGTGTTGTCCTGGAAGGGTCGGACAAAATGGTGAGGCCAACT  | [5493] |
| Desmodus     | GGATGTGGTGTGTTGTTCTGGAAGGGTCGGACAGATTGGTGAGGCCAACT  | [5436] |
| Rhinopoma    | GGACGTGGTGTGTTGTTCTGGAAGGGTCGGACCAAGTTGGCGAGGCCAACT | [5505] |
| Emballonura  | GGATGTGGTGTGTTGTTCTGGAAGGGTCGGACCAAATAGGCGAGGCCAACT | [5442] |
| Cow          | GGATGTGGCATTCTCCTGGAAGGCTCGGACGAGGTGGGCGAGGCCAACT   | [5484] |
| Pangolin     | GGATGTGGTGTGTTGTCCTGGAAGGGTCGGACAAAATCGGCGAGGCCAACT | [5490] |
| Whale        | GGATGTGGCATTCTCCTGGAAGGGTCGGACAACTGGGCGAGGCCAACT    | [5484] |

|   |      |      |      |      |       |
|---|------|------|------|------|-------|
| [ | 5560 | 5570 | 5580 | 5590 | 5600] |
| [ | .    | .    | .    | .    | .]    |

|              |                                                    |        |
|--------------|----------------------------------------------------|--------|
| Tonatia      | TCAACAGGAGCAGGGAGTTCATGGAGGAGGTGATCCAGCGGATGGACGTG | [5477] |
| Myotis       | TCAACAGGAGCAAGGAGTTCCTGGAGCGGTGATCCGGCAGATGGAGGTG  | [5516] |
| Tadarida     | TCAACAAGAGTAAGGAGTTCATGGAGCAGGTGATCCAACGGATGGACGTG | [5504] |
| Taphozous    | TCAACAAGAGCAAGGAGTTCATAGAGGAGGTGATCCAGCGGATGGACGTG | [5504] |
| Megaderma    | TCAACAGGAGCAAGGAGTTCATGGAGGAGGTGATCCGGCGGATGGACGTG | [5519] |
| Cynopterus   | TCAACAGGAGCAAGGAATTCATGGAGGAGGTGATCCAGCGGATGGACGTG | [5531] |
| Pteropus     | TCAACAGGAGCAAGGAGTTCATGGAGGAGGTGATCCAGCGGATGGATGTG | [5516] |
| Hipposideros | TCAACAGGAGCAAGGAATTCATGAGGAGGTGATCCAGCGGATGGAGGTG  | [5555] |
| Cat          | TCAACAAGAGCAGGGAGTTCATGGAGGAGGTGATCCGGCGCATGGATGTG | [5558] |
| Human        | TCAACAGGAGCAAGGAGTTCATGGAGGAGGTGATCCAGCGGATGGATGTG | [5552] |
| Mouse        | TCAATAAGAGCAAGGAGTTCGTGGAGGAGGTAATCCAGCGCATGGACGTG | [5450] |
| Flyinglemur  | TCAACAGGAGCAGGGAGTTCACGGAGGAGGTGATCCCGCGCATGGACGTG | [5561] |
| NycterisG    | TCAACAGGAGCAGGGAGTTCATGGAGGAGGTGATCCGGCGGATGGATGTG | [5462] |
| Antrozous    | TCAACAGGAGCAAGGAGTTCATGGAGGAAGTATCCGACAGATGGACGTG  | [5507] |
| Rhogeessa    | TCAACAGGAGCAAGGAGTTCATGGAGGAAGTATCCGGAGGATGGACGTG  | [5525] |
| Noctilio     | TCAATAAGAGCAGGGAGTTCATGGAGGAGGTGATCCGGCGGATGGATGTG | [5513] |
| Natalus      | TCAACAGGAGCAGGGAGTTCATGGAGGAGGTGATCCGGCGGATGGACGTG | [5510] |
| Rhinolophus  | TCAACAGGAGCAAGGAGTTCGTGGAGGAGGTGATCCGGCGGATGGCTGTG | [5546] |
| Rousettus    | TCAACAGGAGCAAGGAGTTCATGGAGGAGGTGATCCAGCGGATGGACGTG | [5519] |
| NycterisT    | TCAACAGGAGCAGGGAATTCATGGAGGAGGTGATCCGGCGGATGGACGTG | [5486] |
| Nyctimene    | TCAACAGGAGCAAGGAGTTCATGGAGGAGGTGATCCAGCGGATGGACGTG | [5534] |
| Mole         | TCAACAGGAGCAGGGAGTTCCTGGAGCAGGTGATCCAGCACATGGACGTG | [5546] |
| Horse        | TCAACAGGAGCAGGGAATTCATGGAGGAGGTGATCCAGCGGATGGATGTG | [5543] |
| Desmodus     | TCAACAGGAGCAGGGAGTTCATGGAGGAGGTGATCCAGCGGATGGACGTG | [5486] |
| Rhinopoma    | TCAACAGGAGCAAGGAGTTCATGGAGGAGGTGATCCAGCGGATGGACGTG | [5555] |
| Emballonura  | TCAACAAGAGCAGGGAGTTCATGGTGGAGGTGATCCAGCGCATGGATGTG | [5492] |
| Cow          | TCAACAGGAGCGCAGAGTTCATGGAGGAGGTGATCCAGCGCATGGACGTG | [5534] |
| Pangolin     | TCAACAGGAGCAGGGAGTTCATGGAGGAGGTGATCCGGCAGATGGACGTG | [5540] |
| Whale        | TCAACAGGAGCACGGAGTTCCTGGAGGAGGTGATCCGGCAGATGGACGTG | [5534] |

|   |      |      |      |      |       |
|---|------|------|------|------|-------|
| [ | 5610 | 5620 | 5630 | 5640 | 5650] |
| [ | .    | .    | .    | .    | .]    |

|              |                                                      |        |
|--------------|------------------------------------------------------|--------|
| Tonatia      | GGCCAGACGCCATCCACGTACCGGTGCTGCAGTACCGGTACACGGTGAC    | [5527] |
| Myotis       | GGCCAGGAGAGCATCCACGTCTCGGTGCTGCAATACTCGTACACGGTGAC   | [5566] |
| Tadarida     | GGCCAGGACAGCATCCACATCACCCTGCTGCAGTACTCATACT??????    | [5554] |
| Taphozous    | GGCCCGGACAGCATCCACGTACAGTGTGCTGCAGTACGCTTACACCGTGAC  | [5554] |
| Megaderma    | GGCCAGGACAGCATTCATGTACAGTGTGCTGCAGTACGCTTACGTTGAC    | [5569] |
| Cynopterus   | AGCCAGGACAGCATCCACGTACAGTGTGCTGCAGTACTCCTACGTGGTGAC  | [5581] |
| Pteropus     | AGCCAGGACAGCATCCACGTACAGTGTGCTGCAGTACTCCTACGTGGTGAC  | [5566] |
| Hipposideros | GGCCAGGATAGCATCCATGTACAGTGTGCTGCAGTATGCGTACGTGGTGAC  | [5605] |
| Cat          | GGCCAGGACGGCATCCACATCACAGTGTGCTGCAGTACTCGTACATGGTGAC | [5608] |
| Human        | GGCCAGGACAGCATCCACGTACCGGTGCTGCAGTACTCCTACATGGTGAC   | [5602] |
| Mouse        | AGCCCGGATGCAACGGCATCTCAGTACTGCAGTATTCCTACACGGTAACT   | [5500] |
| Flyinglemur  | GGCCAGGACAGCATCCACGTGCGGTGCTGCAGTACTCGTACGTGGTGAC    | [5611] |
| NycterisG    | GGCCAGGACAGCATCCACGTACAGTGTGCTGCAGTATGCATACATGGTGAC  | [5512] |
| Antrozous    | GGCCAGGAGAGCATCCACATCACCCTGCTGCAATACTCGTACACGGTGAC   | [5557] |

|             |                                                   |        |
|-------------|---------------------------------------------------|--------|
| Rhogeessa   | GGCCAGGAGAGCATCCACATCACAATCTGCAATACTCGTACACGGTGAC | [5575] |
| Noctilio    | GGCCAGGACAGCATCCACATCAGGGTCTGCACTACTCATAATGGTGAC  | [5563] |
| Natalus     | GGCCAGAACAGCATCCACATCAGTGTGCACTACTCGTACACGGTGAC   | [5560] |
| Rhinolophus | GGCCAGGACAGCATCCACGTACGGTGTGCACTATGCCTACGTGGTGAC  | [5596] |
| Rousettus   | AGCCAGGACAGCATCCACGTACGGTGTGCACTACTCCTACGTGGTGAC  | [5569] |
| NycterisT   | GGCCAGGACAGCATCCACGTACAGTGTGCACTATGCGTACATGGTGAC  | [5536] |
| Nyctimene   | AGCCAGGACAGCATCCACGTCTCGGTGTGCACTACTCCTACGTGGTGAC | [5584] |
| Mole        | GGCCGGGACAGCATCCACGTGCGGTGTGCACTACTCCTACACGGTGAC  | [5596] |
| Horse       | GGCCAGGACGCCATCCACATCAGTGTGCACTACGCATACAGGGTGAC   | [5593] |
| Desmodus    | GGCCAGGACGCCATCCACATCAGTGTGCACTACTCATAACGGTGAC    | [5536] |
| Rhinopoma   | GGCCAGGACGGCTCCACATTGCACTGTGCACTACGCATACGTGGTGAC  | [5605] |
| Emballonura | GGCGTGGACAGCATCCACATCGCACTGTGCACTACGCGAACACGGTGAC | [5542] |
| Cow         | GGCCAGGACGGCATCCACGTACAGTGTGCACTACTCATATGTGGTGAC  | [5584] |
| Pangolin    | GGCCAGGAGGGCATCCACGTACAGTGTGCACTACTCGTACATGGTGAC  | [5590] |
| Whale       | GGCCGGGACAGTGTGCACTACGGTGTGCACTACTCATAACGTGGTGAC  | [5584] |

[ 5660 5670 5680 5690 5700 ]  
[ . . . . . ]

|              |                                                      |        |
|--------------|------------------------------------------------------|--------|
| Tonatia      | CGTGGAGGCCACCTTCCGCGAGACCCAGTCCAAGGGGGAGGTCCTGCAGC   | [5577] |
| Myotis       | CGTGGAGACCACCTTCCGCGAGACACAGTCCAAGCAGGACGTCCTGCAGC   | [5616] |
| Tadarida     | ???????????????????????????????????????????????????? | [5604] |
| Taphozous    | CGTGGAGTCTACCTTCCGCGAGACCCAGTCCAAGGGGGACGTCCTGCAGC   | [5604] |
| Megaderma    | CCCGGAGTCCACCTTCCGCGAGACCCAGTCCAAGGGGGACGTCCTGCAGC   | [5619] |
| Cynopterus   | TGTGGAGTCCACCTTCCGCGAGACACAGTCCAAGGGGGACGTCCTGCAGC   | [5631] |
| Pteropus     | CGTGGAGTCCACCTTCCGCGAGACACAGTCCAAGGGGGACATCCTGCAGC   | [5616] |
| Hipposideros | CGTGGAGTCCACCTTCCGCGAGACACAGTCCAAGGGGGACGTCCTGCAGC   | [5655] |
| Cat          | TGTGGAGTACACCTTCCGCGAGACCCAGTCCAAGGGGGAGGTCCTGCAGC   | [5658] |
| Human        | CGTGGAGTACCCCTTCCGCGAGACACAGTCCAAGGGGGACATCCTGCAGC   | [5652] |
| Mouse        | CATGGAGTATGCCTTCCGCGAGACCCAGTCCAAGGGGGAGGTCCTGCAGC   | [5550] |
| Flyinglemur  | CGCGGAGCACACCTTCCGCGAGACCCAGTCCAAGGGGGACGTCCTGCAGC   | [5661] |
| NycterisG    | TGTGGAATCCACCTTCCGCGAGACACAGTCCAAGGGGGACGTCCTGCAGC   | [5562] |
| Antrozous    | CGAGGAGACCACCTTCCGCGAGACACAGTCCAAGGGGGACATCCTGCAGC   | [5607] |
| Rhogeessa    | CGAGGAGACCACCTTCCGCGAGACACAGTCCAAGGGGGACGTCCTGCAGC   | [5625] |
| Noctilio     | TGTGGAGTTCACCTTCCGCGAGACACAGTCCAAGGGGGACATCCTGCAGC   | [5613] |
| Natalus      | CGTGGAGTTCACCTTCCGCGAGACACAGTCCAAGGGGGATGTCCTGCAGC   | [5610] |
| Rhinolophus  | TGTGGAGTCCACCTTCCGCGAGACACAGTCCAAGGGGGACGTCCTGCAGC   | [5646] |
| Rousettus    | CGTGGAGTCCACCTTCCGCGAGACACAGTCCAAGGGGGACGTCCTGCAGC   | [5619] |
| NycterisT    | TGTGGAGTCCACCTTCCGCGAGACACAGTCCAAGGGGGACGTCCTGCAGC   | [5586] |
| Nyctimene    | CGTGGAGTCCACCTTCCGCGAGACACAGTCCAAGGGGGACGTCCTGCAGC   | [5634] |
| Mole         | GGCGGAGCACAC?TCCGCGAGACCCAGTCCAAGGGGGACGTCCTGCAGC    | [5646] |
| Horse        | CATGGAGTACACTTCCGCGAGACACAGTCCAAGGGGGACGTCCTGCAGC    | [5643] |
| Desmodus     | CGTGGAGGCCACCTTCCGCGAGACCCAGTCCAAGGGGGACGTCCTGCAGC   | [5586] |
| Rhinopoma    | CGTGGAGTCCACCTTCCGCGAGACACAGTCCAAGGGGGACGTCCTGCAGC   | [5655] |
| Emballonura  | CGTGGAGTCCACCTTCCGCGAGACACAGTCCAAGGGGGACGTCCTGCAGC   | [5592] |
| Cow          | TGTGGAGCACTCCTTCCGCGAGACACAGTCCAAGGGGGACGTCCTGCAGC   | [5634] |
| Pangolin     | TGTGGAGTACAGCTTCCGCGAGACCCAGTCCAAGGGGGACATCCTGCAGC   | [5640] |
| Whale        | CGTGGAGCACTCCTTCCGCGAGACCCAGTCCAAGGGGGACGTCCTGCAGC   | [5634] |

[ 5710 5720 5730 5740 5750 ]  
[ . . . . . ]

|              |                                                      |        |
|--------------|------------------------------------------------------|--------|
| Tonatia      | GGGTGCGGAGATCCGCTACCAAGGYGTAACAGCACCAACACGGGACTG     | [5627] |
| Myotis       | GGGTGCGGAGATCCGCTACCAAGGGCGGCAACAGCACCAACACGGGCTG    | [5666] |
| Tadarida     | ???????????????????????????????????????????????????? | [5654] |
| Taphozous    | GGGTGCGGAGATCCGCTACCAAGGGCGGCAACAGCACCAACACGGGACTG   | [5654] |
| Megaderma    | GGGTCCGGGACATCCGCTACCAAGGGGTGGCAACAGGACCAACACAGGGCTG | [5669] |
| Cynopterus   | GGGTGCGGAGATCCGCTACCA????????????????????????????    | [5681] |
| Pteropus     | GGGTGCGGAGATCCGCTACCAAGGGCGGCAACAGGACCAACACGGGGCTA   | [5666] |
| Hipposideros | GGGTCCGGGAGATCCCTTCCGCGGCGGCAACAGGACCAACACAGGACTG    | [5705] |
| Cat          | AGGTGCGGAGATCCGCTACCAAGGGGTGGCAATAGGACCAACACTGGACTG  | [5708] |
| Human        | GGGTGCGGAGATCCGCTACCAAGGGCGGCAACAGGACCAACACTGGGCTG   | [5702] |
| Mouse        | ACGTGCGGAGATCCGCTACCAAGGGCGGCAATAGGACCAACACTGGGCTG   | [5600] |
| Flyinglemur  | GGGTGCGGAGATCCGCTACCAAGGGGTGGTAACAGGACCAACACTGGACTG  | [5711] |
| NycterisG    | GGGTGCGGAGATCCGCTACCAAGGGGTGGCAACAGGACCAACACAGGCTG   | [5612] |
| Antrozous    | GGGTGCGGAGATCCGCTACCAAGGGCGGCAACAGGACCAACACGGGCTG    | [5657] |
| Rhogeessa    | GGGTGCGGAGATCCGCTACCAAGGGCGGCAACAGGACCAACACGGGCTG    | [5675] |
| Noctilio     | GGGTCCGGGAGATCCGCTACCAAGGGCGGCAACTACACCAACACGGGACTG  | [5663] |
| Natalus      | GAGTGGCAAGATCCGCTACCAAGGGCGGCAACAGGACCAACACAGGACTG   | [5660] |
| Rhinolophus  | GGGTCCGGGAGATCCGCTACCAAGGGGTGGTAACAGGACCAACACGGGACTG | [5696] |
| Rousettus    | GGGTGCGGAGATCCGCTTCCGCGGCGGCAACAGGACCAACACGGGGCTA    | [5669] |
| NycterisT    | GGGTGCGGAGATCCGCTACCAAGGGCGGCAACAGGACCAACACAGGCTG    | [5636] |
| Nyctimene    | GGGTGCGGAGATCCGCTACCAAGGGCGGCAACGGGACCAACACAGGGCTG   | [5684] |

|             |                                                    |          |
|-------------|----------------------------------------------------|----------|
| Mole        | AGGTGCGGGAGCTGCGCTTCCGGGGAGGCAACGGGACCAACACAGGCGG  | [ 5696 ] |
| Horse       | GTGTGCGTGAGATCCGCTACCAGGGCGGCAACAGGACCAACACCGGACTG | [ 5693 ] |
| Desmodus    | GGGTGCGGAGATCCGCTACCAGGGCGGCAACAGCACCACACCGGGCTG   | [ 5636 ] |
| Rhinopoma   | GGGTCCGGGACATCCGCTACCAGGGCGGCAACAGGACCAACACAGGACTG | [ 5705 ] |
| Emballonura | GGGTGCGGAGATCCGCTACCAGGGTGGCAACAGCACCACACCGGACTG   | [ 5642 ] |
| Cow         | GACTCCGTGAAGTCCGCTACCAGGGTGGCAACAGCACCACACCGGGGCTG | [ 5684 ] |
| Pangolin    | GTGTGCGGAGATCCGCTTCCAGGGCGGCAACAGGACCAACACTGGGCTG  | [ 5690 ] |
| Whale       | GGGTGCGGGAGATCCGCTACCAGGGTGGCAACCGGACCAACACCGGGCTG | [ 5684 ] |

|   |      |      |      |      |       |
|---|------|------|------|------|-------|
| [ | 5760 | 5770 | 5780 | 5790 | 5800] |
| [ | .    | .    | .    | .    | .]    |

|              |                                                      |          |
|--------------|------------------------------------------------------|----------|
| Tonatia      | GCCCTGCAGTACGTTTTGCAACACAGCTTCTCGGCCAGCGAGGGGATCG    | [ 5677 ] |
| Myotis       | GCCCTGCAGTACGTGTCCGAGCACACCTTCTCGGCCAGCCTGGGAGACCG   | [ 5716 ] |
| Tadarida     | GCCCTGCAGTACGTGTCTGAGCACAGCTTCTCGGCCAGCCAGGGGACCG    | [ 5704 ] |
| Taphozous    | GCCCTGCAGTACGTGTCTGAGCACAGCTTCTCAGCCAGCCAGGGGACCG    | [ 5704 ] |
| Megaderma    | GCCCTGCAGTACGTGTCTGAGCACAGCTTCTCGGCCAGCCAGGGGACCG    | [ 5719 ] |
| Cynopterus   | ???????????????????????????????????????????????????  | [ 5731 ] |
| Pteropus     | GCCCTGCAGTACTGTCTGAAACACAGCTTCTCGGCCAGCCAGGGGACCG    | [ 5716 ] |
| Hipposideros | GCCCTGCAGTACGTGTCCGAGCACAGCTTCTTGGCCAGCCAGGGTACCG    | [ 5755 ] |
| Cat          | KCCCTGCAGTACGTGTCTGAAACACAGCTTCTCAGCCAACCGGGGACCG    | [ 5758 ] |
| Human        | GCCCTGCGGTACCTCTCTGACCACACAGCTTCTTGGTCAGCCAGGGTACCG  | [ 5752 ] |
| Mouse        | GCCCTGCAGTACCTTTCTGAGCACAGCTTCTCTCCAGCCAAGGGGACCG    | [ 5650 ] |
| Flyinglemur  | GCCCTGCAGTACGTGTCTGAGCACAGCTTCTCTGCCAGCCAGGGGACCG    | [ 5761 ] |
| NycterisG    | GCCCTGCAGTACCTCTCTGAGCACAGCTTCTTGGCCAGTGAGGGGACCG    | [ 5662 ] |
| Antrozous    | GCCCTGCAGTACGTGTCTGAGCACACCTTCTCGGCCAGCCTGGGGGACCG   | [ 5707 ] |
| Rhogeessa    | GCCCTGCAGTACGTGTCTGAGCACACCTTCTCGGCCAGCCTGGGGGACCG   | [ 5725 ] |
| Noctilio     | GCCCTGCAGTACGTGTCTGAGAACAGCTTCTTGGTCAGCCAGGGGACCG    | [ 5713 ] |
| Natalus      | GCCCTGCAGTACCTGTCTGAGCATAGCTTCTCAACCAGCCAGGGGACCG    | [ 5710 ] |
| Rhinolophus  | GCCCTGCAGTACCTGTCTCCGAGCACAGCTTCTTGGCCAGCCAGGGGACCG  | [ 5746 ] |
| Rousettus    | GCCCTGCAGTACCTGTCTGAGCACAGCTTCTCCATCAGCCAGGGGACCG    | [ 5719 ] |
| NycterisT    | GCCCTGCAGTACCTCTCTGAGCACAGCTTCTTGGCCAGTGAGGGGACCG    | [ 5686 ] |
| Nyctimene    | GCCCTGCAGTACCTGTCCGAGCACAGCTTCTCGGCCAGCCAGGGGACCG    | [ 5734 ] |
| Mole         | GCCCTGCAGTACCTGGCCGAGCACAGCTTCTCGGCCGCCAGGGGACCG     | [ 5746 ] |
| Horse        | GCCCTACAGTACCTGTCTGAGCACAGCTTCTTGGCCAGCCAGGGGACCG    | [ 5743 ] |
| Desmodus     | GCCCTGCAGTACGTGTCCGAGCACAGCTTCTCGGCCAGCCAGGGGACCG    | [ 5686 ] |
| Rhinopoma    | GCCCTGCA? ?????????????????????????????????????????? | [ 5755 ] |
| Emballonura  | GCCCTGCAGTACCTGTCCGAACACAGCTTCTTGGTCAGCCAGGGGACCG    | [ 5692 ] |
| Cow          | GCCCTGCAGTACTGTCTGAGCACAGCTTCTCTGCCAGCCAGGGGACCG     | [ 5734 ] |
| Pangolin     | GCCCTGCAGTACCTGTCTGAGCACAGCTTCTTGGCCGCCAGGGGACCG     | [ 5740 ] |
| Whale        | GCCCTGCAGTACCTGTCCGAGCACAGCTTCTCGGCCAGCCAGGGGACCG    | [ 5734 ] |

|   |      |      |      |      |       |
|---|------|------|------|------|-------|
| [ | 5810 | 5820 | 5830 | 5840 | 5850] |
| [ | .    | .    | .    | .    | .]    |

|              |                                                      |          |
|--------------|------------------------------------------------------|----------|
| Tonatia      | GGAGCAGTACCTAACCTGGTCTACATTGTCTACAGGAAA????????????  | [ 5727 ] |
| Myotis       | AGAGCAGGCACCTAACCTGGTCTACATGGTCAACCGCAACCCCGCTCTG    | [ 5766 ] |
| Tadarida     | GGAGGAGGCACCTAACCTGGTCTACATGGTCAACAGGGAACCCCGCTCTG   | [ 5754 ] |
| Taphozous    | GGAGCAGGCACCTAACCTGGTCTACATGGTCAACAGGAGCCCGCTCTG     | [ 5754 ] |
| Megaderma    | GGAGCAGGCACCTAACCTGGTCTACATGGTCAACAGGGAACCCCGCTCTG   | [ 5769 ] |
| Cynopterus   | ???????????????????????????????????????????????????  | [ 5781 ] |
| Pteropus     | GGAGCAGGCACCTAACCTGGTCTACATGGTCAACAGGGAACCCCGCTCTG   | [ 5766 ] |
| Hipposideros | GGAGCAGGTGCCCAACCTGGTCTACATGGTCAACAGGGAACCCCGCTCTG   | [ 5805 ] |
| Cat          | GGAGCAGGCACCTAACCTGGTCTACATGGTCAACAGGGAACCCCGCTCTG   | [ 5808 ] |
| Human        | GGAGCAGGCACCTAACCTGGTCTACATGGTCAACAGGGAACCCCGCTCTG   | [ 5802 ] |
| Mouse        | GGTAGAGGCACCTAACCTGGTCTACATGGTCAACAGGGAACCCCGCTCTG   | [ 5700 ] |
| Flyinglemur  | GGAGCAGGCACCTAACCTGGTCTACATGGTCAACAGGGAACCCCGCTCTG   | [ 5811 ] |
| NycterisG    | GGAGCAGGCACCTAACCTGGTCTACATGGTCAACAGGGAACCCCGCTCTG   | [ 5712 ] |
| Antrozous    | GGAGCAGGCACCT??????????????????????????????????????? | [ 5757 ] |
| Rhogeessa    | GGAGCAGGCACCTAACCTGGTCTACATGGTCAACAGGGAACCCCGCTCTG   | [ 5775 ] |
| Noctilio     | GGAGCAGGCACCTAACCTGGTCTACATGGTCAACAGGGAACCCCGCTCTG   | [ 5763 ] |
| Natalus      | GGAGCAAGCACCTAACCTGGTCTACATGGTCAACAGGGAACCCCGCTCTG   | [ 5760 ] |
| Rhinolophus  | GGAGCAGGCACCTAACCTGGTCTACATGGTCAACAGGGAACCCCGCTCTG   | [ 5796 ] |
| Rousettus    | GGAGCAGGCACCTAACCTGGTCTACATGGTCAACAGGGAACCCCGCTCTG   | [ 5769 ] |
| NycterisT    | GGAGCAGGCACCTAACCTGGTCTACATGGTCAACAGGGAACCCCGCTCTG   | [ 5736 ] |
| Nyctimene    | GGAGCAGGCACCTAACCTGGTCTACATGGTCAACAGGGAACCCCGCTCTG   | [ 5784 ] |
| Mole         | GGAGGAGGCACCTAACCTGGTCTACATGGTCAACAGGGAACCCCGCTCTG   | [ 5796 ] |
| Horse        | GGAGCAGGCACCTAACCTGGTCTACATGGTCAACAGGGAACCCCGCTCTG   | [ 5793 ] |
| Desmodus     | GGAGCAGGCACCTAACCTGGTCTACATGGTCAACAGGGAACCCCGCTCTG   | [ 5736 ] |
| Rhinopoma    | ???????????????????????????????????????????????????  | [ 5805 ] |
| Emballonura  | GGAGCAGGCACCTAACCTGGTCTACATGGTCAACAGGGAACCCCGCTCTG   | [ 5742 ] |
| Cow          | GGAGCAGGCACCTAACCTGGTCTACATGGTCAACAGGGAACCCCGCTCTG   | [ 5784 ] |
| Pangolin     | GCAGCAGGCACCTAACCTGGTCTACATGGTCAACAGGGAACCCCGCTCTG   | [ 5790 ] |

Whale GGAGCAGGCGCCCAACCTGGTCTACATGGTCACGGGGAGCCCGCCTCAG [5784]

[ 5860 5870 5880 5890 5900 ]  
[ . . . . . ]

Tonatia ????????????????????????????????????????????????????????????? [5777]  
Myotis ATGTGATCAAGCGGATGCTGGCGACATCCAGGTGGTGCCCATCGCGCTG [5816]  
Tadarida ATGAGATCAAGCGCATGCCCGGAGACATCCAGGTGGTGCCCATGGAGTG [5804]  
Taphozous ATACGATCACACGGACGCTGGAGACATCCAGGTGGTGCCCATGGGGTG [5804]  
Megaderma ACACGATCACGCGGATGCCCGGAGACATCAACTGGTGCCCATGGAGTG [5819]  
Cynopterus ????????????????????????????????????????????????????????????? [5831]  
Pteropus ACGAGATCAAACGGATGCTGGAGACATCCAGGTGGTGCCCATGGAGTG [5816]  
Hipposideros ATGAGATCAAGCGGATGCCAGGAGACATCCAGGTGGTGCCATTGGAGTG [5855]  
Cat ATGAGATCAGGCGGATGCTGGAGACATCCAGGTGGTACCCATCGGAGTG [5858]  
Human ATGAGATCAAGCGGCTGCCTGGAGACATCCAGGTGGTGCCCATGGAGTG [5852]  
Mouse ATGAGATCAAGAGGTTGCTGGAGACATCCAGGTGGTACCCATTGGGGTG [5750]  
Flyinglemur ACGAGATCAAGCGGTTGCCCGGAGACATCCAGGTGGTGCCCATCGGAGTG [5861]  
NycterisG ATGAGATCAAGCGGATGCTGGAGATATCCAGGTGGTGCCCAT???????? [5762]  
Antrozous ????????????????????????????????????????????????????????????? [5807]  
Rhoageessa ATGAGATCAAGCGGATGCTGGAGACATCCAGGTGGTGCCCATCGGGTG [5825]  
Noctilio ATGTGATCAAGCGGATGCTGGAGACATCCAGGTGGTGCCCATGGAGTG [5813]  
Natalus ATGAGATCAAGCGGATGCCCGGAGACATCCAGGTGGTGCCCATGGAGTG [5810]  
Rhinolophus ATGAGATTAAGCGGATGCCCGGAGACATCCAGGTGGTGCTGTTGGAGTG [5846]  
Rousettus ACGAGATCAAGGGATG???????????????????????????????????????? [5819]  
NycterisT ATGAGATCAAGCGGATGCTGGAGATATCCAGGTGGTGCCCATGGAGTG [5786]  
Nyctimene ACGAGATCAAGCGGATGCTGGAGACATCCAGGTGGTGCCCATGGAGTG [5834]  
Mole ACGAGATCAGGAGGATGCCGGGACATCCAGGTGGTGCCCATCGGGTG [5846]  
Horse ????????????????????????????????????????????????????????????? [5843]  
Desmodus ATGTGATCAAGCGGATGCCCGGAGACATCCAGGTGGTGCCCATGGAGTG [5786]  
Rhinopoma ????????????????????????????????????????????????????????????? [5855]  
Emballonura ATGAGATCAAACGGATGCCCGGAGACATCCAGGTGGTGCCCATGGAGTG [5792]  
Cow ACAAGATCCAGCGGATGCTGGAGACATCCAGGTGGTGCCCATCGGCGTG [5834]  
Pangolin ACGTGATCACGCGGATGCTGGAGACATCCAGGTGGTGCCCATGGAGTG [5840]  
Whale ATGAGATCAGGCGGATGCTGGAGACATCCAGGTGGTGCCCATGGGGTG [5834]

[ 5910 5920 5930 5940 5950 ]  
[ . . . . . ]

Tonatia ????????????????????????????????????????????????????????????? [5827]  
Myotis GGCCCTCATGCCAACGTGCTGGAGCTGGAGAGGATTGGCTGGCCCAATGA [5866]  
Tadarida GGCCCTCATGCCGACGTGCAGGAGCTGGAGAGGATCGGCTGG???????? [5854]  
Taphozous GGCCCTCATGCCGATGTGCAGGAGCTGGAGAAGAT???????????????? [5854]  
Megaderma GGTCTCTGT?CCGACGTTCCGGA?CT?GAGAGGGTAG?CTGC???????? [5869]  
Cynopterus ????????????????????????????????????????????????????????????? [5881]  
Pteropus GGTCTCAGGCTGACGTGCAGGAGCTGGAGAGGATC?GCTGGCCCAATGC [5866]  
Hipposideros GGCCCTCGAGCCGACGTGCAGGAGTTGGAGAGGATCGGCTGGCCCAATGC [5905]  
Cat GTCCCTCATACCAACCT???????????????????????????????????? [5908]  
Human GGCCCTAATGCCAACGTGCAGGAGCTGGAGAGGATTGGCTGGCCCAATGC [5902]  
Mouse GGCCCCCATGCCAACATGCAGGAAGCTGGAGAGGATCAGCAGGCCCATCGC [5800]  
Flyinglemur GGCCCTCATGCCAACGTGCAGGAGCTGGAGAGGATCGGCTGGCCCAATGC [5911]  
NycterisG ?????A???????????????????????????????????????????????????????? [5812]  
Antrozous ????????????????????????????????????????????????????????? [5857]  
Rhoageessa GGCCCTCATGCCAACGTGCAGGAGCTAGAGAGGATTGGCTGGCCCAATGT [5875]  
Noctilio GGCCCTCATGCCAACGTGCAGGAAGCTGGAGAAGAT???????????????? [5863]  
Natalus GGCCCTCATGCCGATGTGCAGGAGCTGGAGAGGATCGGCTGGCCCAATGC [5860]  
Rhinolophus GGCCCTGAGCTGACGTGCAGGAGCTGGAGAGGATCTGCTGGCCCAATGC [5896]  
Rousettus ????????????????????????????????????????????????????????????? [5869]  
NycterisT GGCCCCATGCCGACGTGCAGGAGCT???????????????????????????? [5836]  
Nyctimene GGTCTCAGGCTGACGTGCAGGAGCTGGAGAGGAT???????????????? [5884]  
Mole GGCCCGCA?GCCGACGTGCCGAGCTGGAGCGGATCGGCTGGCCCAACGC [5896]  
Horse ????????????????????????????????????????????????????????????? [5893]  
Desmodus GGCCCTCATGCCAATGTGCCGAGCTGGAGAGGATGGGCTGGCCCT???? [5836]  
Rhinopoma ????????????????????????????????????????????????????????????? [5905]  
Emballonura GGCCCGCTGCTGA?GTGCAGGAGCTGGAGAGGATCGGCTGGCCCA?TGC [5842]  
Cow GGCCCGCGTGGATGTGCAGGAGCTGGAGAGGATCAGCTGGCCCAAGAC [5884]  
Pangolin GGTCTCATGCCAGCTGCAGGAGCTGCAGAGGATTGGCTGGCCCAATGC [5890]  
Whale GGACCTCGGCTGGACGTGCAGGAGCTGGAGAAGATCGGCTGGCCCAAGGC [5884]

[ 5960 5970 5980 5990 6000 ]  
[ . . . . . ]

Tonatia ???GCCATCGCGCGGTTATCACCTTCTTAATCTCTTACCATCTTTG [5877]  
Myotis GCCCGCATCGCGCGGTCATCACCTTCTCTTACCATCTTTG [5916]

|              |                                                          |        |
|--------------|----------------------------------------------------------|--------|
| Tadarida     | ????GCCATCGCGGGCGGTCATCACCTTCCTCATTCTTTCACCATCTTCG       | [5904] |
| Taphozous    | ????GCCATCGCAGCAGTCATCACCTTCCTCATTCTTTCACCATCTTCG        | [5904] |
| Megaderma    | ????GCCATCGCTGCGGTCATCACCTTCCTCATTCTTTCACCATCTTCG        | [5919] |
| Cynopterus   | ????GCCATCGCTGCGGTCATCACCTTTCTCATCTTTCACCATCTTCG         | [5931] |
| Pteropus     | CCCCGCCATCGCTGCGGTCATCACCTTCCTCATCTTTCACCATCTTCG         | [5916] |
| Hipposideros | CCCCGCCATCGCTGCGGTCATCACCTTCCTCATTCTTTCACCATCTTCG        | [5955] |
| Cat          | ????GCCATCGCGGGCGGTCATCACCTTCCTCATTCTTTCACCATCTTCG       | [5958] |
| Human        | CCCTGCCATAGCGGGGCCATCACCTTCCTCATTCTTTTACCATCTTCG         | [5952] |
| Mouse        | TCCCGCCATCGCTGCGGCATCACCTTTCTCATCTTTCACCATTTTCG          | [5850] |
| Flyinglemur  | CCCCGCTATCGCGGGCGGTCATCACCTTCCTCATTCTTTCACCATCTTCG       | [5961] |
| NycterisG    | ????GCCATCGCAGCAGTCATCACCTTCTCATTCTTTCACCATCTTCG         | [5862] |
| Antrozous    | ????GCCATCGCGGGCGGTCACCTTCCTCATCTTTCACCATCTTTG           | [5907] |
| Rhogeessa    | CCCCGCCATCGCGGGCGGTCACCTTCCTTCTCATCTTTCACCATCTTCG        | [5925] |
| Noctilio     | ????GCCATCGCTGCGGTTATCACCTTCCTTATTCTTTCACCATCTTCG        | [5913] |
| Natalus      | CCCCGCCATGCGGGCGGTCATCACCTTCCTCATTCTTTCACATCTTCG         | [5910] |
| Rhinolophus  | CCC?GCCATCGCTGCGGTCATCACCTTCTCATTCTTTCACCATCTTCG         | [5946] |
| Rousettus    | ????GCCATCGCTGCGGGCCATCACCTTCCTCATCTTTCACCATCTTCG        | [5919] |
| NycterisT    | ????GCCATCGCAGCAGTCATCACCTTCTCATTCTTTCACCATCTTCG         | [5886] |
| Nyctimene    | ????GCCATCGCTGCGGTCATCACCTTCCTCATCTTTCACCATCTTCG         | [5934] |
| Mole         | CCCCGCCATCGCGGCCATCATCATCTTCTCATCTTTCACCATCTTTG          | [5946] |
| Horse        | ????GCCATGCGGGCGGTCATCACCTTCCTCATCTTTCACCATCTTTG         | [5943] |
| Desmodus     | ????GCCATCGCGGGCGGTTATCACCTTCCTAATTCTTTCACCATCTTTG       | [5886] |
| Rhinopoma    | ????????????????????????????????????????????????CATCTTCG | [5955] |
| Emballonura  | ????GCCATCGCGGGCGGTCATCACCTTCCTCATTCTTTCACCATCTTCG       | [5892] |
| Cow          | CCCCGCCATCGCGGGCGGTCATCACCTTCCTCATCTTTCACCATCTTCG        | [5934] |
| Pangolin     | CCCCGCCATGCGGCTGTCATCACCTTCCTCATCTTTCACCATCTTTG          | [5940] |
| Whale        | CCC?GCCATCGCGGGCGGTCATCACCTTCCTCATCTTTCACCATCTTCG        | [5934] |

[ 6010 6020 6030 6040 6050 ]  
[ . . . . . ]

|              |                                                    |        |
|--------------|----------------------------------------------------|--------|
| Tonatia      | GTAACGCGCTGGTCATCTGGCGGTGTTGACCAGCCGCTCGCTGCGAGCC  | [5927] |
| Myotis       | GCAACGCACTGGTCATCTGGCGGTGTTGACGAGCCGCTCGCTGCGCGCC  | [5966] |
| Tadarida     | GCAACGCGCTAGTCATCTGGCGGTGTTGACGAGCCGCTCCCTGCGCGCC  | [5954] |
| Taphozous    | GCAACGCGCTGGTTATCTGGCGGTGTTGACAAGCCGCTCGCTGCGTGCC  | [5954] |
| Megaderma    | GCAATGCACTGGTCATCTGGCGGTGTTGACGAGCCGCTCGCTCCGCGCC  | [5969] |
| Cynopterus   | GCAACGCGCTGGTCATCTGGCGGTGTTGACGAGCCGCTCGCTACGCGCC  | [5981] |
| Pteropus     | GCAACGCGCTTGTATCTGGCGGTGTTGACAAGCCGCTCGCTACGCGCC   | [5966] |
| Hipposideros | GCAACGCACTGGTCATCTGGCAGTGTGACGAGCCGCTCGCTCCGTGCC   | [6005] |
| Cat          | GCAACGCGCTGGTCATCTGGCTGTGTTGACGAGTGTGCTCGCTGCGCGCC | [6008] |
| Human        | GCAACGCTTGGTCATCTGGCTGTGTTGACGAGCCGCTCGCTGCGCGCC   | [6002] |
| Mouse        | GCAATGCGCTGGTAATTCTGGCTGTGTTGACCAGCCGCTCTCTCCGTGCA | [5900] |
| Flyinglemur  | GCAACGTGCTGGTCATCTGGCTGTGTTGACGAGCCGCTCGCTGCGTGCC  | [6011] |
| NycterisG    | GCAATGCTCTGGTCATCTGGCGGTGTTGACGAGCCGCTCGCTGCGCGCC  | [5912] |
| Antrozous    | GCAACGCACTGGTCATCTGGCGGTGTTGACGAGCCGCTCGCTGCGCGCC  | [5957] |
| Rhogeessa    | GCAATGCACTGGTCATCTGGCGGTGTTGACCAGCCGCTCGCTGCGCGCC  | [5975] |
| Noctilio     | GTAACGTGCTCGTCATCTGGCGGTGTTGACCAGCCGCTCGCTTCCGCGCT | [5963] |
| Natalus      | GCAATGCGTTAGTCATCTGGCGGTATTGACAAGCCGCTCACTGCGCGCT  | [5960] |
| Rhinolophus  | GCAACGCGCTGGTCATCTGGCGGTGTTGACGAGCCGCTCGCTCCGCGCC  | [5996] |
| Rousettus    | GCAACGCGCTTGTATCTGGCGGTGTTGACAAGCCGCTCGCTACGCGCC   | [5969] |
| NycterisT    | GCAACGCTTGGTCATCTGGCGGTGTTGACGAGCCGCTCGCTGCGCGCC   | [5936] |
| Nyctimene    | GCAACGCGCTTGTATCTGGCGGTGTTGACAAGCCGCTCGCTACGCGCC   | [5984] |
| Mole         | GCAACGCGCTGGTCATCTGGCTGTGTTGACAAGCCGCTCGCTGCGCGCC  | [5996] |
| Horse        | GCAACGCGCTGGTCATCTGGCTGTGTTGACGAGCCGCTCGCTGCGCGCC  | [5993] |
| Desmodus     | GCAACGCGCTGGTCATCTGGCGGTGTTGACGAGCCGCTCGCTGCGCGCT  | [5936] |
| Rhinopoma    | GCAACGCACTGGTCATCTGGCGGTGTTGACAAGCCGCTCGCTTCCGCGCC | [6005] |
| Emballonura  | GCAACGCGCTGGTCATCTCGCGGTGTTGACGAGCCGCTCACTGCGCGCC  | [5942] |
| Cow          | GCAACGCGCTGGTCATCTGGCTGTGTTGACGAGCCGCTCGCTGCGCGCC  | [5984] |
| Pangolin     | GCAACGCGCTGGTCATCTGGCTGTGTTGACTAGCCGCTCGCTGCGCGCC  | [5990] |
| Whale        | GCAACGCGCTGGTCATCTGGCTGTGTTGACAAGCCGCTCGCTGCGAGCC  | [5984] |

[ 6060 6070 6080 6090 6100 ]  
[ . . . . . ]

|              |                                                  |        |
|--------------|--------------------------------------------------|--------|
| Tonatia      | CCGCAGAACCTGTTCTGGTGTCTATTGGCCGAGCCGACATCTGGTGCC | [5977] |
| Myotis       | CCGCAGAACCTGTTCTGGTGTCTATTGGCTGCGCGGACATCTGGTGCC | [6016] |
| Tadarida     | CCGCAGAACCTGTTCTGGTGTCTATTGGCCGCTGTGACATCTGGTGCC | [6004] |
| Taphozous    | CCGCAGAACCTGTTCTGGTGTCTATTGGCCGCGCCGACATCTGGTAGC | [6004] |
| Megaderma    | CCGCAGAACCTGTTCTGGTGTCTATTGGCCGCGCCGACATCTGGTGCC | [6019] |
| Cynopterus   | CCGCAGAACCTGTTCTGGTGTCTATTGGCCGCGCCGACATCTGGTGCC | [6031] |
| Pteropus     | CCGCAGAACCTGTTCTGGTGTCTATTGGCCGCGCCGACATCTGGTGCC | [6016] |
| Hipposideros | CCGCAGAACCTGTTCTGGTGTCTATTGGCCGAGCTGATATCTGGTGCC | [6055] |
| Cat          | CCGCAGAACCTGTTCTGGTGTCTATTGGCCGCGCCGACATCTGGTGCC | [6058] |

|             |                                                      |          |
|-------------|------------------------------------------------------|----------|
| Human       | CCTCAGAACCTGTTCCCTGGTGTGCGTGGCCGCCGCGACATCCTGGTGGC   | [ 6052 ] |
| Mouse       | CCACAAAACCTCTTCCTGGTGTCACTGGCAGCAGCCGACATCCTAGTGGC   | [ 5950 ] |
| Flyinglemur | CCGCAAAACCTGTTCCCTGGTGTGCGTGGCCGCCGCGACATCCTGGTGGC   | [ 6061 ] |
| NycterisG   | CCGCAGAACCTGTTCCCTGGTGTGCGTTAGCCGCCGCGACATCCTAGTGGC  | [ 5962 ] |
| Antrozous   | CCGCAAAACCTGTTCCCTGTTGTGTCCTTGGCTGCGCGTACATCCTGGTGGC | [ 6007 ] |
| Rhogeessa   | CCACAAAACCTTTTCCTTGTGTCCTTGGCTGCTGCTGACATCCTGGTGGC   | [ 6025 ] |
| Noctilio    | CCGCAGAACCTGTTCCCTGGTGTGCGTTGGCCGCCGCGACATCCTAGTGGC  | [ 6013 ] |
| Natalus     | CCACAGAACCTGTTCCCTGGTGTGCGTTAGCCGCCGCGACATCCTGGTGGC  | [ 6010 ] |
| Rhinolophus | CCGCAGAACCTGTTTCTGGTGTGCGTTGGCTGACGCCGACATCCTGGTGGC  | [ 6046 ] |
| Rousettus   | CCGCAGAACCTGTTTCTGGTGTGCGTTGGCCGCCGCGACATCCTGGTGGC   | [ 6019 ] |
| NycterisT   | CCGCAGAACCTGTTCCCTGGTGTGCGTTGGCCGCCGCGACATCCTAGTGGC  | [ 5986 ] |
| Nyctimene   | CCGCAGAACCTGTTCCCTGGTGTGCGTTGGCCGCCGCGACATCCTGGTGGC  | [ 6034 ] |
| Mole        | CCGCAGAACTGTGTTCCCTGGTGTGCGTGGCCGCCGCGTACATCCTGGTGGC | [ 6046 ] |
| Horse       | CCGCAGAACCTGTTCCCTGGTGTGCGTGGCCGCCGCGTACATCCTGGTGGC  | [ 6043 ] |
| Desmodus    | CCGCAGAACCTGTTCCCTGGTGTGCGTTGGCCGCCGCGACATCCTGGTGGC  | [ 5986 ] |
| Rhinopoma   | CCGCAGAACCTGTTCCCTGGTGTGCGTTGGCCGCCGCGACATCCTGGTGGC  | [ 6055 ] |
| Emballonura | CCGCAGAACCTGTTCCCTGGTGTGCGTTGGCCGCCGCGACATCCTGGTAGC  | [ 5992 ] |
| Cow         | CCGCAGAACCTGTTCCCTAGTGTGCGTGGCCGCCGCGACATCCTGGTAGC   | [ 6034 ] |
| Pangolin    | CCACAGAACCTGTTCCCTGGTGTGCGTGGCCGCCGCGTACATCCTTGTGGC  | [ 6040 ] |
| Whale       | CCGCAGAACCTGTTCCCTAGTGTGCGTGGCCGCCGCGACATCCTGGTGGC   | [ 6034 ] |

[ 6110 6120 6130 6140 6150 ]  
[ . . . . . ]

|              |                                                     |          |
|--------------|-----------------------------------------------------|----------|
| Tonatia      | CGCGCTCATCATCCCTTTCTCACTGGCCAACGAGCTGCTGGGCTACTGGT  | [ 6027 ] |
| Myotis       | CACGCTCATCATCCCTTTCTCGCTGGCCAACGAGCTGCTGGGCTACTGGT  | [ 6066 ] |
| Tadarida     | CACGCTCATCATCCCTTTCTCGCTGGCCAACGAGCTGCTGGGCTACTGGT  | [ 6054 ] |
| Taphozous    | TACGCTCATCATCCCTTTCTCGCTGGCCAACGAGCTGCTGGGCTACTGGT  | [ 6054 ] |
| Megaderma    | CACGCTCATCATCCCTTTCTCGCTGGCCAACGAGCTGCTGGGCTACTGGT  | [ 6069 ] |
| Cynopterus   | CACGCTCATCATCCCTTTCTCGCTGGCCAACGAGCTGCTGGGCTACTGGT  | [ 6081 ] |
| Pteropus     | CACGCTCATCATCCCTTTCTCGCTGGCCAACGAGCTGCTGGGCTACTGGT  | [ 6066 ] |
| Hipposideros | CACGCTCATCATCCCTTTCTCGCTGGCCAACGAGCTGCTAGGCTAYTGGT  | [ 6105 ] |
| Cat          | CACGCTCATCATCCCTTTCTCGCTGGCCAACGAGCTGCTGGGCTACTGGT  | [ 6108 ] |
| Human        | CACGCTCATCATCCCTTTCTCGCTGGCCAACGAGCTGCTGGGCTACTGGT  | [ 6102 ] |
| Mouse        | TACTCTTATCATCCCTTTCTCTCTGGCCAACGAGCTGCTGGGCTATGGT   | [ 6000 ] |
| Flyinglemur  | CGCGCTCATCATCCCTTTCTCGCTGGCCAACGAGCTGCTGGGCTACTGGT  | [ 6111 ] |
| NycterisG    | CACGCTCATCATCCCTTTTCTCACTGGCCAACGAGCTGCTGGGCTACTGGT | [ 6012 ] |
| Antrozous    | CACGCTCATCATCCCTTTCTCGCTGGCCAACGAGCTGCTGGGCTATTGGT  | [ 6057 ] |
| Rhogeessa    | CACGCTCATCATCCCTTTCTCGTTGGCCAACGAGCTGCTGGGCTATTGGT  | [ 6075 ] |
| Noctilio     | CTCGCTCATCATCCCTTTCTCTCTGGCCAACGAGCTGCTGGGCTACTGGT  | [ 6063 ] |
| Natalus      | CACGCTTATCATCCCTTTCTCACTGGCCAATGAGCTGCTGGGCTACTGGT  | [ 6060 ] |
| Rhinolophus  | CACGCTCATCATCCCTTTCTCGCTGGCCAACGAGCTGCTAGGCTACTGGT  | [ 6096 ] |
| Rousettus    | CACGCTCATCATCCCTTTCTCGCTGGCCAATGAGCTGCTGGGCTACTGGT  | [ 6069 ] |
| NycterisT    | CACGCTCATCATCCCTTTTCTCACTGGCCAACGAGCTGCTGGGCTACTGGT | [ 6036 ] |
| Nyctimene    | CACGCTCATCATCCCTTTCTCGCTGGCCAACGAGCTGCTGGGCTACTGGT  | [ 6084 ] |
| Mole         | CACGCTGATTATCCCTTTCTCGCTGGCCAACGAACTGTTGGGCTACTGGT  | [ 6096 ] |
| Horse        | CACGCTCATCATCCCTTTCTCGTTGGCCAATGAGCTGCTGGGCTACTGGT  | [ 6093 ] |
| Desmodus     | CGCGCTCATCATCCCTTTCTCTCTGGCCAACGAGCTGCTGGGCTACTGGT  | [ 6036 ] |
| Rhinopoma    | CACGCTCATCATCCCTTTTCTCGCTGGCCAACGAGCTGCTGGGCTACTGGT | [ 6105 ] |
| Emballonura  | TACGCTCATCATCCCTTTCTCGCTGGCCAACGAGCTGCTAGGCTACTGGT  | [ 6042 ] |
| Cow          | CACGCTCATCATCCCTTTCTCGCTGGCCAACGAGTTGCTGGGCTACTGGT  | [ 6084 ] |
| Pangolin     | AACGCTCATCATCTTTCTCGCTGGCCAATGAGCTGCTCGGCTATTGGT    | [ 6090 ] |
| Whale        | CACGCTCATCATCCCTTTCTCGCTGGCCAACGAGCTGCTGGGCTACTGGT  | [ 6084 ] |

[ 6160 6170 6180 6190 6200 ]  
[ . . . . . ]

|              |                                                    |          |
|--------------|----------------------------------------------------|----------|
| Tonatia      | ACTTCCGGCGAACGTGGTGCAGGTTGACCTGGCGCTCGACGTGCTCTTC  | [ 6077 ] |
| Myotis       | ACTTCCGGCGAACGTGGTGCAGGTTGACCTGGCTCTCGACGTGCTCTTC  | [ 6116 ] |
| Tadarida     | ACTTTCGGCGAATGTTGTCGAGGTTGACCTGGCCCTCGATGTGCTCTTC  | [ 6104 ] |
| Taphozous    | ACTTCCGGGAGAACGTGGTGCAGGTTGACCTGGCGCTCGACGTGCTCTTC | [ 6104 ] |
| Megaderma    | ACTTCCGGCGCACTTGGTGTGAGGTTGACCTGGCGCTCGACGTGCTCTTC | [ 6119 ] |
| Cynopterus   | ACTTCCGGCGCACGTGGTGCAGGTTGACCTGGCGCTCGATGTGCTCTTC  | [ 6131 ] |
| Pteropus     | ACTTCCGGCGCACGTGGTGCAGGTTGACCTGGCGCTCGACGTGCTCTTC  | [ 6116 ] |
| Hipposideros | ACTTCCGGCGCACTTGGTGCAGGTTGACCTGGCGCTCGACGTGCTCTTC  | [ 6155 ] |
| Cat          | ACTTCCGGCGCACGTGGTGTGAGGTTGACTTGGCGCTCGACGTGCTCTTC | [ 6158 ] |
| Human        | ACTTCCGGCGCACGTGGTGCAGGTTGACCTGGCGCTCGACGTGCTCTTC  | [ 6152 ] |
| Mouse        | ACTTCTGGCGTGCCTGGTGCAGGTTGACCTGGCGCTAGACGTGCTCTTC  | [ 6050 ] |
| Flyinglemur  | ACTTCTGGCGCACGTGGTGCAGGTTGACCTGGCGCTGGACGTGCTCTTC  | [ 6161 ] |
| NycterisG    | ACTTCCGGGAGAACGTGGTGCAGGTTGACCTGGCGCTCGACGTGCTCTTC | [ 6062 ] |
| Antrozous    | ACTTCCGGGCAAGCTGGTGTGAGGTTGACCTGGCTCTCGACGTGCTCTTC | [ 6107 ] |
| Rhogeessa    | ACTTCCGGCAAGCTGGTGTGAGGTTGACCTGGCTCTCGACGTGCTCTTC  | [ 6125 ] |
| Noctilio     | ACTTCCGGCGAACGTGGTGCAGGTTGACCTGGCGCTAGACGTGCTCTTC  | [ 6113 ] |



|             |                                                     |        |
|-------------|-----------------------------------------------------|--------|
| Natalus     | ACTTCCGGCGAACGTGGTGCGAGGTGTACCTGGCTCTCGACGTGCTCTTC  | [6110] |
| Rhinolophus | ACTTCCGGCGCACTTGGTGCGAGGTGTACCTAGCGCTCGACGTGCTCTTC  | [6146] |
| Rousettus   | ACTTCCGGCGCACGTGGTGTGAGGTGTACCTGGCGCTCGACGTGCTCTTC  | [6119] |
| NycterisT   | ACTTCCGGGAGAACGTGGTGCGAGCTGTACCTGGCGCTCGACGTGCTCTTC | [6086] |
| Nyctimene   | ACTTCCGACGCACATGGTGCGAGGTGTACCTGGCGCTCGACGTGCTCTTC  | [6134] |
| Mole        | ACTTCCGGCGCATGTGGTGCAAGGTGTACCTGGCGCTGGACGTGCTCTTC  | [6146] |
| Horse       | ACTTCCGGCGCACGTGGTGTGAGGTGTACCTGGCGCTCGACGTGCTCTTC  | [6143] |
| Desmodus    | ACTTCCGGCGAACGTGGTGCGAGGTGTACCTGGCGCTCGACGTGCTCTTC  | [6086] |
| Rhinopoma   | ACTTCCGGCGCACTTGGTGCGAGGTGTATCTAGCGCTCGACGTGCTCTTC  | [6155] |
| Emballonura | ACTTCCGGCGAACGTGGTGCGAGGTGTACCTGGCACTCGACGTGCTCTTC  | [6092] |
| Cow         | ACTTCCGGCGCACCTGGTGCGAGGTGTACCTGGCGCTCGACGTGCTCTTC  | [6134] |
| Pangolin    | ACTTCCGGCGCACGTGGTGCGAGGTGTACCTGGCGCTCGATGTGCTCTTC  | [6140] |
| Whale       | ACTTCCGGCGCACCTGGTGCGAGGTGTACCTGGCGCTCGACGTGCTCTTC  | [6134] |

[ 6210 6220 6230 6240 6250 ]  
[ . . . . . ]

|              |                                                     |        |
|--------------|-----------------------------------------------------|--------|
| Tonatia      | TGTA CTTCATCCATCGTGCACCTGTGCGCCATCAGCCTGGACCGCTACTG | [6127] |
| Myotis       | TGTA CTTCGTCCATCGTGCACCTGTGTGCCATCAGCCTGGACCGCTACTG | [6166] |
| Tadarida     | TGTA CTTCGTCCATCGTGCACCTGTGCGCCATCAGCCTGGACCGCTACTG | [6154] |
| Taphozous    | TGTA CTTCGTCCATCGTGCACCTGTGCGCCATCAGCCTGGACCGCTACTG | [6154] |
| Megaderma    | TGTA CTTCGTCCATCGTGCACCTGTGTGCGATCAGCCTGGACCGCTACTG | [6169] |
| Cynopterus   | TGTA CTTCGTCCATCGTGCACCTGTGCGCCATCAGCCTGGACCGCTACTG | [6181] |
| Pteropus     | TGTA CTTCGTCTATCGTGCACCTGTGTGCCATCAGCCTGGACCGCTACTG | [6166] |
| Hipposideros | TGTA CTTCGTCTATCGTGCACCTGTGCGCCATCAGCCTGGACCGCTACTG | [6205] |
| Cat          | TGTA CTTCGTCCATCGTGCACCTGTGCGCCATCAGCCTGGACCGCTACTG | [6208] |
| Human        | TGTA CTTCGTCCATCGTGCACCTGTGCGCCATCAGCCTGGACCGCTACTG | [6202] |
| Mouse        | TGTA CTTCCTCCATCGTGCACCTGTGTGCCATCAGTCTGGACAGATACTG | [6100] |
| Flyinglemur  | TGTA CTTCGTCCATCGTGCACCTGTGCGCCATCAGCCTGGACCGCTACTG | [6211] |
| NycterisG    | TGTA CTTCGTCCATCGTGCACCTGTGCGCCATCAGCCTGGACCGCTACTG | [6112] |
| Antrozous    | TGTA CTTCGTCCATCGTGCACCTGTGTGCCATCAGTCTGGACCGCTACTG | [6157] |
| Rhogeessa    | TGTA CTTCCTCCATCGTGCACCTGTGTGCCATCAGTCTGGACCGCTACTG | [6175] |
| Noctilio     | TGTA CTTCCTCCAACGTGCATCTGTGCGCCATCAGCCTGGACCGCTACTG | [6163] |
| Natalus      | TGTA CTTCCTCCATCGTGCACCTGTGCGCCATCAGCCTGGATCGCTACTG | [6160] |
| Rhinolophus  | TGTA CTTCGTCCATCGTGCACCTGTGCGCCATCAGCCTGGACCGCTACTG | [6196] |
| Rousettus    | TGTA CTTCGTCTATCGTGCACCTGTGTGCCATCAGCCTGGACCGCTACTG | [6169] |
| NycterisT    | TGTA CTTCGTCCATCGTGCACCTGTGCGCCATCAGCCTGGACCGCTACTG | [6136] |
| Nyctimene    | TGTA CTTCGTCTATCGTGCACCTGTGTGCCATCAGTCTGGACCGCTACTG | [6184] |
| Mole         | TGTA CTTCCTCCATCGTGCACCTGTGCGCCATCAGCCTGGACCGCTACTG | [6196] |
| Horse        | TGTA CTTCCTCCATCGTGCACCTGTGCGCCATCAGCCTGGACCGCTACTG | [6193] |
| Desmodus     | TGTA CTTCATCCATCGTGCACCTGTGTGCCATCAGCCTGGACCGCTACTG | [6136] |
| Rhinopoma    | TGTA CTTCGTCCATCGTGCACCTGTGCGCCATCAGCCTGGATCGCTACTG | [6205] |
| Emballonura  | TGTA CTTCGTCCATCGTGCACCTGTGCGCCATCAGCCTGGACCGCTACTG | [6142] |
| Cow          | TGTA CTTCCTCCATCGTGCACCTGTGTGCCATCAGCCTGGACCGCTACTG | [6184] |
| Pangolin     | TGTA CTTCGTCCATCGTGCACCTGTGCGCCATCAGCCTGGACCGCTACTG | [6190] |
| Whale        | TGTA CTTCCTCCATCGTGCACCTGTGCGCCATCAGCCTGGACCGCTACTG | [6184] |

[ 6260 6270 6280 6290 6300 ]  
[ . . . . . ]

|              |                                                       |        |
|--------------|-------------------------------------------------------|--------|
| Tonatia      | GGCTGTGAGCCGCGCTCTGGAGTACAACCTCCAAACGCACCCCGCGCCGCA   | [6177] |
| Myotis       | GGCCGTAAGCCGCGCTCTGGAGTACAACACCAAGCGCACCCCGCGCCGCA    | [6216] |
| Tadarida     | GGCCGTAAGCCGCGCTCTGGAGTACAACCTCCAAAGCGTACCCACGCGCGCA  | [6204] |
| Taphozous    | GGCGGTGAGCCGCGCTCTGGAGTACAACCTCCAAAGCGTACCCCGCGCGCA   | [6204] |
| Megaderma    | GGCCGTGAGCCGCGCACTGGAGTACAACCTCCAAAGCGCACCCCGCGCCGAA  | [6219] |
| Cynopterus   | GGCCGTGAGTCGCGCGCTGGAGTACAACCTCCAAAGCGCACCCCGCGCCGCA  | [6231] |
| Pteropus     | GGCCGTGAGTCGCGCACTGGAGTACAACCTCCAAAGCGCACCCACGTCGCA   | [6216] |
| Hipposideros | GGCCGTAAGCCGCGCGCTGGAGTACAACCTCCAAAGCGCACCCCGCGCCGCA  | [6255] |
| Cat          | GGCCGTGAGTCGCGCGCTGGAGTACAACCTCCAAAGCGCACCCACGCGCGCA  | [6258] |
| Human        | GGCCGTGAGCCGCGCGCTGGAGTACAACCTCCAAAGCGCACCCCGCGCCGCA  | [6252] |
| Mouse        | GGCAGTGAGCCGAGCATTGGAGTACAACCTCCAAAGCGCACTCCACGCGCGCA | [6150] |
| Flyinglemur  | GGCGGTGAGCCGCGCTCTGGAGTACAACCTCCAAAGCGCACCCCGCGCCGCA  | [6261] |
| NycterisG    | GGCAGTGAGCCGCGCGCTGGAGTACAACCTCCAAAGCGCACCCCGCGCCGCA  | [6162] |
| Antrozous    | GGCCGTAAGCCGCGCTCTGGAGTACAACACCAAGCGCACCCCGCGCCGAA    | [6207] |
| Rhogeessa    | GGCCGTAAGCCGCGCTCTGGAGTACAACACCAAGCGCACCCCGCGCCGCA    | [6225] |
| Noctilio     | GGCTGTGAGCCGCGCTCTGGAGTACAACCTCCAAAGCGTACCCCGCGCCGCA  | [6213] |
| Natalus      | GGCCGTGAGCCGCGCTGGAGTACAACCTCCAAAGCGTACCCCGCGCCGCA    | [6210] |
| Rhinolophus  | GGCCGTGAGCCGCGCGCTGGAGTACAACCTCCAAAGCGCACCCCGCGCCGCA  | [6246] |
| Rousettus    | GGCAGTGAGTCGCGCGCTGGAGTACAACCTCCAAAGCGCACCCCGCGCCGCA  | [6219] |
| NycterisT    | GGCGGTGAGCCGCGCGCTGGAGTACAACCTCCAAAGCGCACCCCGCGCCGCA  | [6186] |
| Nyctimene    | GGCGGTGAGTCGCGCTCTGGAAACAACCTCCAAAGCGCACCCCGCGCCGCA   | [6234] |
| Mole         | GGCCGTGAGCCGAGCCCTGGAGTACAACCTCCAAAGCGCACCCCGCGCCGCA  | [6246] |
| Horse        | GGCCGTGAGCCGCGCGCTGGAGTACAACACCAAGCGCACCCCGCGCCGCA    | [6243] |

|             |                                                     |          |
|-------------|-----------------------------------------------------|----------|
| Desmodus    | GGCTGTTAGCCGAGCTCTGGAGTACAACCTCCAACCGTACCCCGCGCCGCA | [ 6186 ] |
| Rhinopoma   | GGCCGTGAGCCGCGCTCTGGAGTACAACCTCCAAGCGCACCCCGCGCCGCA | [ 6255 ] |
| Emballonura | GGCGGTGAGCCGCGCTCTGGAGTACAACCTCCAAGCGTACACCGAGACGCA | [ 6192 ] |
| Cow         | GGCAGTGAGCCGGCCCTGGAGTACAACCTCCAAGCGCACCCCGCGCCGCA  | [ 6234 ] |
| Pangolin    | GGCGGTGAGCCGAGCACTGGAGTACAACCTCCAAGCGCACCCCGCGCCGCA | [ 6240 ] |
| Whale       | GGCCGTGAGCCGCGCTGGAGTACAACCTCCAAGCGCACCCCGCGCCGCA   | [ 6234 ] |

[ 6310 6320 6330 6340 6350 ]  
[ . . . . . ]

|              |                                                     |          |
|--------------|-----------------------------------------------------|----------|
| Tonatia      | TCAAGTGCATCATCCTCACCGTGTGGCTCATTCAGCTGTCATCTCGCTG   | [ 6227 ] |
| Myotis       | TCAAGTGCATCATCCTCACCGTGTGGCTCATTCAGCTGTCATCTCGCTG   | [ 6266 ] |
| Tadarida     | TCAAGTGCATCATCCTCACTGTGTGGCTCATTCGCCGTGTCATCTCGTTG  | [ 6254 ] |
| Taphozous    | TCAAGTGCATCATCCTCACCGTGTGGCTCATCGCAGCTGTCATCTCGCTG  | [ 6254 ] |
| Megaderma    | TCAAGTGCATCATCCTTACTGTGTGGCTCATCGCAGCTGTCATCTCGCTG  | [ 6269 ] |
| Cynopterus   | TCAAGTGCATCATCCTCACCGTGTGGCTCATCGCGGTGTCATCTCGCTG   | [ 6281 ] |
| Pteropus     | TCAAGTGCATCATCCTCACCGTGTGGCTCATTCGCCGTGTCATCTCGCTG  | [ 6266 ] |
| Hipposideros | TCAAGTGCATCATCCTCACTGTGTGGCTCATCGCAGCTGTCATCTCGCTG  | [ 6305 ] |
| Cat          | TCAAGTGCATCATCCTCACCGTGTGGCTCATCGCAGCTGTCATCTCCCTG  | [ 6308 ] |
| Human        | TCAAGTGCATCATCCTCACTGTGTGGCTCATCGCCGGTTCATCTCGCTG   | [ 6302 ] |
| Mouse        | TCAAGTGCATCATCCTCACCGTGTGGCTCATTCAGCCGTCATTTCTCTA   | [ 6200 ] |
| Flyinglemur  | TCAAGTGCATCATCCTTACCGTGTGGCTCATCGCAGCCGTCATTTTCGCTG | [ 6311 ] |
| NycterisG    | TCAAGTGCATTATCCTCACCGTGTGGCTCATCGCAGCTGTCATATCGCTG  | [ 6212 ] |
| Antrozous    | TCAAGTGCATCATCCTCACTGTGTGGCTCATTCAGCTGTCATCTCGCTG   | [ 6257 ] |
| Rhogeessa    | TCAAGTGCATCATCCTCACTGTGTGGCTCATTCGCTGTCATCTCGCTG    | [ 6275 ] |
| Noctilio     | TCAAGTGCATCATCCTCACTGTGTGGCTCATTCGCCGTGTCATCTCGCTG  | [ 6263 ] |
| Natalus      | TCAAGTGCATCATCCTCACCGTGTGGCTCATCGCAGCTGTCATCTCGCTG  | [ 6260 ] |
| Rhinolophus  | TCAAGTGCATCATCCTCACCGTGTGGCTCATCGCAGCTGTCATCTCGTTG  | [ 6296 ] |
| Rousettus    | TCAAGTGCATCATCCTCACCGTGTGGCTCATCGCGGTGTCATCTCGCTG   | [ 6269 ] |
| NycterisT    | TCAAGTGCATTATCCTCACCGTGTGGCTCATCGCAGCTGTCATATCGCTG  | [ 6236 ] |
| Nyctimene    | TCAAGTGCATCATCCTCACCGTGTGGCTCATCGCGGTGTCATCTCGCTG   | [ 6284 ] |
| Mole         | TCAAGTGCATCATCCTCATGGTGTGGCTCATCGCAGCTGTCATCTCGCTG  | [ 6296 ] |
| Horse        | TCAAGTGCATCATCCTCACCGTGTGGCTCATCGCAGCTGTCATCTCGCTG  | [ 6293 ] |
| Desmodus     | TCAAGTGCATCATCCTCACCGTGTGGCTCATCGCGGTGTCATCTCGCTG   | [ 6236 ] |
| Rhinopoma    | TCAAGTGCATCATCCTCACAGTGTGGCTCATCGCAGCTGTCATCTCGCTG  | [ 6305 ] |
| Emballonura  | TCAAGTGCATCATCCTCATTGTGTGGCTCATTCAGCTGTCATCTCGCTG   | [ 6242 ] |
| Cow          | TCAAGTGCATCATCCTCATCGTATGGTTCATCGCAGCGGTTATCTCGCTG  | [ 6284 ] |
| Pangolin     | TCAAGTGCATCATCCTCACCGTGTGGCTCATTCGCCGTTTCATCTCGCTG  | [ 6290 ] |
| Whale        | TCAAGTGCATCATCCTCACCGTGTGGCTCATCGCAGCTGTCATCTCGCTG  | [ 6284 ] |

[ 6360 6370 6380 6390 6400 ]  
[ . . . . . ]

|              |                                                     |          |
|--------------|-----------------------------------------------------|----------|
| Tonatia      | CCGCCCTCATCTACAAGGGCGACCAGGGCCCCAACCCCGGGCGGCC      | [ 6277 ] |
| Myotis       | CCGCCCTACTCTACAAGGGCGACCAGGGCCCCCGGGCCCCCGGGCGGCC   | [ 6316 ] |
| Tadarida     | CCGCCCTCGTCTACAAGGGTGACCCAGGGCCCCAGCCTCGCGGGCGGCC   | [ 6304 ] |
| Taphozous    | CCGCCCTCGTCTACAAGGGCGACCCAGGACCCAGCCCCGCGGGCGGCC    | [ 6304 ] |
| Megaderma    | CCGCCCTCGTCTATAAGGGCGACCCCGGGCCCCAGCCCCGTGGGGCGGCC  | [ 6319 ] |
| Cynopterus   | CCGCCCTCATCTATAAGGGGAGACCAGGGCCCCAGCCCCATGGGGCGGCC  | [ 6331 ] |
| Pteropus     | CCGCCCTCGTCTATAAGGGGAGACCAGGGCCCCAGCCCCGCGGACGCC    | [ 6316 ] |
| Hipposideros | CCGCCCTCGTCTATAAGGACGACCCCGGGCCCCAGCCCCGCGGGCGGCC   | [ 6355 ] |
| Cat          | CCGCCCTTATCTACAAGGGCGACCAGGGCCCCAGCCTCGTGGGGCGGCC   | [ 6358 ] |
| Human        | CCGCCCTCATCTACAAGGGCGACCAGGGCCCCAGCCGCGGGCGGCC      | [ 6352 ] |
| Mouse        | CCGCCCTCATCTACAAGGGCGACCAGCGCCAGAGCCCCAGGGGCTCCC    | [ 6250 ] |
| Flyinglemur  | CCGCCCTCATCTACAAGGGCGATCAGGGCCCCAGCCTCTGGGGCGGCC    | [ 6361 ] |
| NycterisG    | CCGCCCTCGTCTACAAGGGCGACCAGGGCCCCAGCCCCGCGGACGCC     | [ 6262 ] |
| Antrozous    | CCGCCCTACTGTACAAGGGCGACCCGGGGCCCCAGCCCCGCGGACGCC    | [ 6307 ] |
| Rhogeessa    | CCGCCCTTACTGTACAAGGGCGACCCGGGGCCCCAGCCCCGCGGACGTC   | [ 6325 ] |
| Noctilio     | CCGCCCTCATCTACAAGGGTGATCAGGGCCCCAGCCCCGCGGGCGTCC    | [ 6313 ] |
| Natalus      | CCGCCCTCGTCTACAAGGGTGACCGGGTCCCCAGCCCCGCGGACGCC     | [ 6310 ] |
| Rhinolophus  | CCGCCCTCGTCTATAAGGACGACCCGGGGCCCCAGCCCCGTGGGGCGGCC  | [ 6346 ] |
| Rousettus    | CCGCCCTCGTCTATAAGGGGAGACCAGGGACCCAGCCTCACGGGGCGGCC  | [ 6319 ] |
| NycterisT    | CCGCCCTCGTCTACAAGGGCGACCAGGGCCCCAGCCCCGCGGACGCC     | [ 6286 ] |
| Nyctimene    | CCGCCCTCATCTATAAGGGGAGACCAGGGTCCCCAGCCCCGTGGGGCGGCC | [ 6334 ] |
| Mole         | CCATCCCTTGTCTACAAGGGCGACCAGGGCCCCAGCCAGTGGGGCGGCC   | [ 6346 ] |
| Horse        | CCGCCCTTATCTACAAGGGGGAGACCAGGGCCCCAGCCGCGGGGGCGGCC  | [ 6343 ] |
| Desmodus     | CCGCCCTCGTCTACAAGGGCGACCCGGGGCCCCAGCCCCGTGGGGCGGCC  | [ 6286 ] |
| Rhinopoma    | CCGCCCTAGTCTATAAGGGGCGACCCGGGGCCCCAGCCCCGCGGGCGGCC  | [ 6355 ] |
| Emballonura  | CCGCCCTCGTCTACAAGGGCAACCCAGGGCCCCAGCCCCGCGGGCGGCC   | [ 6292 ] |
| Cow          | CCGCCCTCATCTACAAGGGCGACCAGGGTCCCCAGCCCCGTGGGGCGGCC  | [ 6334 ] |
| Pangolin     | CCGCCCTTATTTACAAGGGTGACCAGGGTTCGAGCCCCGCGGGCGGCC    | [ 6340 ] |
| Whale        | CCGCCCTCATCTACAAGGGCGACCCGGGTCCCCAGCCCCAGGGCGGCC    | [ 6334 ] |

|              |                                                    |      |      |      |       |        |
|--------------|----------------------------------------------------|------|------|------|-------|--------|
| [            | 6410                                               | 6420 | 6430 | 6440 | 6450] |        |
| [            | .                                                  | .    | .    | .    | .     | ]      |
| Tonatia      | GCAGTGCAAGCTCAACCAAGAGGCCTGGTACATCCTGGCCTCGAGCATCG |      |      |      |       | [6327] |
| Myotis       | GCAATGCCAGCTCAACCAAGAGACCTGGTACATCCTGGCCTCCAGCTTTG |      |      |      |       | [6366] |
| Tadarida     | ACAGTGCAAGCTCAACCAAGAGGCCTGGTACATCCTGGCCTCCAGCATCG |      |      |      |       | [6354] |
| Taphozous    | ACAGTGCAAGCTCAACCAAGAGGCCTGGTATATCCTGGCCTCCAGCATCG |      |      |      |       | [6354] |
| Megaderma    | ACAGTGCAAGCTCAACCAAGAGGCCTGGTACATCCTGGCCTCCAGCATCG |      |      |      |       | [6369] |
| Cynoptyerus  | GCAGTGCAAGCTCAACCAAGAGGCCTGGTATATCCTGGCCTCCAGCATCG |      |      |      |       | [6381] |
| Pteropus     | GCAATGCCAGCTCAACCAAGAGGCCTGGTACATCCTGGCCTCCAGCATCG |      |      |      |       | [6366] |
| Hipposideros | ACAGTGCAAGCTCAACCAAGAGGCCTGGTACATCCTGGCCTCCAGCATCG |      |      |      |       | [6405] |
| Cat          | GCAGTGCAAACTTAACCAAGAGGCCTGGTACATCCTGGCCTCTAGCATCG |      |      |      |       | [6408] |
| Human        | CCAGTGCAAGCTCAACCAAGAGGCCTGGTACATCCTGGCCTCCAGCATCG |      |      |      |       | [6402] |
| Mouse        | CCAGTGCAAGCTCAACCAAGAGGCCTGGTACATCCTGGCCTCCAGCATCG |      |      |      |       | [6300] |
| Flyinglemur  | CCAGTGCAAGCTCAACCAAGAGGCCTGGTACATCCTGGCCTCCAGCATCG |      |      |      |       | [6411] |
| NycterisG    | ACAGTGCAAGCTTAACCAAGAGGCCTGGTACATCCTGGCCTCCAGCATCG |      |      |      |       | [6312] |
| Antrozous    | ACAATGCCAACTCAACCAAGAGACCTGGTACATCCTGGCCTCCAGCTTTG |      |      |      |       | [6357] |
| Rhogeessa    | ACAATGCCATCTCAACCAAGAGACCTGGTACATCCTGGCCTCCAGCTTTG |      |      |      |       | [6375] |
| Noctilio     | GCAGTGCAAGCTCAACCAAGAGGCCTGGTACATCCTGGCCTCGAGTATCG |      |      |      |       | [6363] |
| Natalus      | GCAGTGCAAGCTCAACCAAGAGGCCTGGTACATCCTGGCCTCCAGCATCG |      |      |      |       | [6360] |
| Rhinolophus  | ACAGTGCAAGCTCAACCAAGAGGCCTGGTATATCCTGGCCTCCAGCATCG |      |      |      |       | [6396] |
| Rousettus    | GCAGTGTAAGCTCAACCAAGAGGCCTGGTACATCCTGGCCTCCAGCATCG |      |      |      |       | [6369] |
| NycterisT    | ACAGTGCAAGCTTAACCAAGAGGCCTGGTACATCCTGGCCTCCAGCATCG |      |      |      |       | [6336] |
| Nyctimene    | GCAATGCCAGCTCAACCAAGAGGCCTGGTACATCCTGGCCTCCAGCATCG |      |      |      |       | [6384] |
| Mole         | CCAGTGCAATCTCAATCAAGAGACCTGGTACATCCTGGCCTCCAGCATCG |      |      |      |       | [6396] |
| Horse        | GCAGTGCAAGCTCAACCAAGAGGCCTGGTATATCCTGGCCTCCAGCATCG |      |      |      |       | [6393] |
| Desmodus     | GCAGTGCAAGCTCAACCAAGAGGCCTGGTACATCCTGGCCTCGAGCATCG |      |      |      |       | [6336] |
| Rhinopoma    | GCAGTGCAAGCTCAACCAAGAGGCCTGGTACATCCTGGCCTCCAGCATCG |      |      |      |       | [6405] |
| Emballonura  | ACAGTGCAAGCTCAACCAAGAGGCCTGGTATATCCTGGCCTCCAGCATCG |      |      |      |       | [6342] |
| Cow          | TCAGTGCAAGCTCAACCAAGAGGCCTGGTATATCCTGGCCTCCAGCATCG |      |      |      |       | [6384] |
| Pangolin     | TCAGTGCAAGCTCAACCAAGAGGCCTGGTACATCCTGGCCTCCAGCATCG |      |      |      |       | [6390] |
| Whale        | TCAGTGCAAGCTCAACCAAGAGGCCTGGTACATCCTGGCCTCCAGCATCG |      |      |      |       | [6384] |

|              |                                                    |      |      |      |       |        |
|--------------|----------------------------------------------------|------|------|------|-------|--------|
| [            | 6460                                               | 6470 | 6480 | 6490 | 6500] |        |
| [            | .                                                  | .    | .    | .    | .     | ]      |
| Tonatia      | GCTCGTTCTTCGCACCCTGCCTCATCATGATCCTCGTCTACCTGCGCATC |      |      |      |       | [6377] |
| Myotis       | GGTCCTTCTTCGCCCCCTGCCTCATCATGATCCTCGTCTACCTGCGTATC |      |      |      |       | [6416] |
| Tadarida     | GGTCCTTCTTCGACCCTGCCTCATCATGATCCTCGTCTACCTGCGCATC  |      |      |      |       | [6404] |
| Taphozous    | GGTCCTTCTTCGACCCTGCCTCATCATGATCCTCGTCTACCTGCGCATC  |      |      |      |       | [6404] |
| Megaderma    | GGTCCTTCTTCGACCCTGCCTCATCATGATCCTCGTCTACCTGCGCATC  |      |      |      |       | [6419] |
| Cynoptyerus  | GGTCCTTCTTCGACCCTGCCTCATCATGATCCTTAGTCTACCTGCGCATC |      |      |      |       | [6431] |
| Pteropus     | GGTCCTTCTTCGACCCTGCCTCATCATGATCCTTAGTCTACCTGCGCATC |      |      |      |       | [6416] |
| Hipposideros | GGTCCTTCTTCGACCCTGCCTCATCATGATCCTCGTGTACCTGCGCATC  |      |      |      |       | [6455] |
| Cat          | GATCTTTCTTCGACCCTGCCTCATCATGATCCTGGTCTACCTGCGCATC  |      |      |      |       | [6458] |
| Human        | GATCTTTCTTCGACCCTGCCTCATCATGATCCTGGTCTACCTGCGCATC  |      |      |      |       | [6452] |
| Mouse        | GATCTTTCTTCGACCCTGCCTCATCATGATCCTCGTCTACCTGCGAATC  |      |      |      |       | [6350] |
| Flyinglemur  | GATCTTTCTTCGACCCTGCCTCATTATGATCCTCGTCTACCTGCGCATT  |      |      |      |       | [6461] |
| NycterisG    | GTTCCTTCTTCGACCCTGCCTCATCATGATCCTTGCTACCTGCGCATC   |      |      |      |       | [6362] |
| Antrozous    | GGTCCTTCTTCGACCCTGCCTCATCATGATCCTYGTCTACCTGCGTATT  |      |      |      |       | [6407] |
| Rhogeessa    | GGTCCTTCTTCGACCCTGCCTCATCATGATCCTCGTCTACCTGCGCATC  |      |      |      |       | [6425] |
| Noctilio     | GGTCCTTCTTCGACCCTGCCTCATCATGATCCTCGTCTACCTGCGCATC  |      |      |      |       | [6413] |
| Natalus      | GGTCCTTCTTCGACCCTGCCTCATCATGATCCTCGTCTACCTGCGCATC  |      |      |      |       | [6410] |
| Rhinolophus  | CGTCCTTCTTCGACCCTGCCTCATCATGGTCTCGTGTACCTGCGCATC   |      |      |      |       | [6446] |
| Rousettus    | GGTCCTTCTTCGACCCTGCCTCATCATGATCCTTAGTCTACCTGCGCATC |      |      |      |       | [6419] |
| NycterisT    | GCTCCTTCTTCGACCCTGCCTCATCATGATCCTTGCTACCTGCGCATC   |      |      |      |       | [6386] |
| Nyctimene    | GGTCCTTCTTCGACCCTGCCTCATCATGATACTAGTCTACCTTGCATC   |      |      |      |       | [6434] |
| Mole         | GATCTTTCTTCGACCCTGCCTCATCATGATCCTTGCTACCTGCGCATC   |      |      |      |       | [6446] |
| Horse        | GATCTTTCTTCGACCCTGCCTCATCATGATCCTTGCTACCTGCGCATC   |      |      |      |       | [6443] |
| Desmodus     | GGTCCTTCTTCGACCCTGCCTCATCATGATCCTCGTCTACCTACGCATC  |      |      |      |       | [6386] |
| Rhinopoma    | GGTCCTTCTTCGCCCCCTGCCTCATCATGATCCTCGTCTACCTGCGCATC |      |      |      |       | [6455] |
| Emballonura  | GGTCCTTCTTCGACCCTGCCTCATCATGATCCTCGTCTACCTGCGCATC  |      |      |      |       | [6392] |
| Cow          | GATCTTTCTTCGACCCTGCCTTATCATGATCCTGGTCTACCTGCGCATC  |      |      |      |       | [6434] |
| Pangolin     | GATCTTTCTTCGACCCTGCCTTATCATGATCCTTGCTACCTGCGCATC   |      |      |      |       | [6440] |
| Whale        | GATCTTTCTTCGACCCTGCCTTATCATGATCCTTGCTACCTGCGGATC   |      |      |      |       | [6434] |

|           |                                                    |      |      |      |       |        |
|-----------|----------------------------------------------------|------|------|------|-------|--------|
| [         | 6510                                               | 6520 | 6530 | 6540 | 6550] |        |
| [         | .                                                  | .    | .    | .    | .     | ]      |
| Tonatia   | TACCTGATAGCTAAACGTAGCCACCGCAGAGGTCCCAGGGCCAAGGGGGG |      |      |      |       | [6427] |
| Myotis    | TACCTGATCGCTAGACGTAGCCACCGCAGAGGCCCCAGGGCCAAGGGGGG |      |      |      |       | [6466] |
| Tadarida  | TACCTGATCGCTAAACGTAGCCACCGCAGAGGTCCCAGGGCCAAGGGGGG |      |      |      |       | [6454] |
| Taphozous | TACCTGATCGCTAAACGTAGCCACCGCAGAGGTCCCAGGGCCAAGGGGGG |      |      |      |       | [6454] |

|              |                                                     |        |
|--------------|-----------------------------------------------------|--------|
| Megaderma    | TACCTGATCGCCAAACGCGAGTCACCGCAGAGGTCCCAGGGCCAAGAGGGG | [6469] |
| Cynopterus   | TACCTGATCGCCAAAGCGCAGCCACCGCAGAGGTCCCAGGGCCAAGGGGGG | [6481] |
| Pteropus     | TACCTGATCGCCAAAGCGTAGCCACCGCAGAGGTCCCAGGGCCAAGGGGGG | [6466] |
| Hipposideros | TACCTGATCGCCAAACGCGAGCCACCGCAGAGGTCCCAGGGCTAAGGGGGG | [6505] |
| Cat          | TACCTGATCGCCAAAGCGCAGCCACCGCAGAGGTCCCAGGGCCAAGGGCCG | [6508] |
| Human        | TACCTGATCGCCAAACGCGAGCAACCGCAGAGGTCCCAGGGCCAAGGGGGG | [6502] |
| Mouse        | TATGTAATGCCAAACGCGAGCCACTGCAGAGGTCTCGGAGCTAAGAGGGG  | [6400] |
| Flyinglemur  | TATATGATCGCCAAACGCGCAACCGCAGAGGTCCCAGGGCCAGGGGGGG   | [6511] |
| NycterisG    | TACCTGATCGCTAAACGCGAGCCACCGCAGAGGTCCCAGGGCCAAGAGGGG | [6412] |
| Antrozous    | TACCTGATCGCCAGACGTAGCCACCAGAGAGGTCCCAGGGCCAAGAGGGG  | [6457] |
| Rhogeessa    | TACCTGATCGCTAGACGTAGCCAACACAGAGGTCCCAGGGCCAAGAGGGG  | [6475] |
| Noctilio     | TACCTGATTGCTAAACGTAGCCACCGAAGAAGTCCCAGGGCCAAGGGGAG  | [6463] |
| Natalus      | TATCTGATCGCTAAACGTAGCCACCTCAGAAGTCCCAGGGCCAAGAGGGG  | [6460] |
| Rhinolophus  | TACCTGATCGCCAAACGCGAGCCACCGCAGAGGTCCCAGGGCCAAGGSGGG | [6496] |
| Rousettus    | TACCTGATCGCCAAAGCGCAGCCACCGCAGAGGTCCCAGGGCCAAGGGGGG | [6469] |
| NycterisT    | TACCTGATCGCTAAACGCGAGCCACCGCAGAGGCCCCAGGGCCAAGAGGGG | [6436] |
| Nyctimene    | TACCTGATTGCCAAGCGTAGCCACCGCAGAGGTCCCAGGGCCAAGGGCGG  | [6484] |
| Mole         | TATCTGATTGCCAAACGCGAGCCACTGCAGAGGTCCCAGGGCCAAGGGGAG | [6496] |
| Horse        | TACCTGATTGCTAAACGCGAGCCACCTCAGAGGTCCCAGGGCCAAGGGAGG | [6493] |
| Desmodus     | TACCTGATAGCTAAACGCGAGCCACCGCAGAGGCCCCAGGGCCAAGGGGAG | [6436] |
| Rhinopoma    | TACCTGATCGCTAAACGCGAGCCACCGCAGAGGTCCCAGGGCCAAGAGGGG | [6505] |
| Emballonura  | TACCTGATCGCTAAACGTAGCCACCGTAGAGGTCCCAGGGCCAAGGGGTG  | [6442] |
| Cow          | TACCTGATTGCCAAGCGCAGCCACTGCAGAGGCCCCAGGGCCAAGGGGGG  | [6484] |
| Pangolin     | TACCTGATCGCCAAACGCGAGCCATCGCAGAGGTCCCAGGGCTAAGTGGGG | [6490] |
| Whale        | TATCTGATCGCCAAAGCGCAGCCACCGCAGAGGTCCCAGGGCCAAGGGGGG | [6484] |

[ 6560 6570 6580 6590 6600 ]  
[ . . . . . ]

|              |                                                     |        |
|--------------|-----------------------------------------------------|--------|
| Tonatia      | CCCTGGGAAGGGTAAATCCAAGCAGCCCCAGGCGGTCCCTGGGGGA----  | [6473] |
| Myotis       | TCCTGGGGAGGGTGAATCTAAGCAGCCCTGCCGGGCCCTGGGGGG----   | [6512] |
| Tadarida     | ACCTGGGGAGGGTGCATCTAGACAGCCCCGCTCGTCCCTGGGGAA----   | [6500] |
| Taphozous    | CCCTGGGGAGGGTGAATCTAAGCAGCCCTGCCGGGTCCCTGGGAGA----  | [6500] |
| Megaderma    | CCCTGGGGTGGGTGAGTCTAAGCAGTCCCACCGGGTTCCGGAGGGA----  | [6515] |
| Cynopterus   | CCTCAGGGACAGTGAGTCTAAGCAGCCCCACAGGGTCCCTGGGGGA----  | [6527] |
| Pteropus     | CCTCAGGGACAATGAGTCTAAGCAGCCCTCACAGGGTCCCTGGGGGA---- | [6512] |
| Hipposideros | CCCTGGGGAGGGTGAATCTAAGCAGCCCCACCGGGTCCCTAGGGGA----  | [6551] |
| Cat          | CCCTAGGGAGGGTGAATCTAAGCAGCCCCGCCCCGCTCCCTACTGGA---- | [6554] |
| Human        | GCCTGGGGAGGGTGAATCCAAGCAGCCCCGACCCGACCATGGTGGGGCTT  | [6552] |
| Mouse        | CTCTGGGGAGGGTGAATCCAAGAAGCCCCGTCGGGCCGCGGGGGAGTTC   | [6450] |
| Flyinglemur  | CCCTGGGGAGGGTGAATCCAAGCAGCCCGCCCTGGCCCTGGGGGGCCCT   | [6561] |
| NycterisG    | CCCTGGGGAGGGTGAATCTAAGCAGCTCCGCCAGGTTTCTGGGGGA----  | [6458] |
| Antrozous    | TTCTGGGGAGGGTGAATCTAAGCAGCCCTGCCGGGTCCCTGGGGGA----  | [6503] |
| Rhogeessa    | TCCTGGGGAGGGTGAATCTAAGCAGCCCTGCAGGGTCCCTGGGGGA----  | [6521] |
| Noctilio     | CTCTGGGGAGGGTGAATCTAAGCAGCCCCACCCAGTCCCTGGGGGA----  | [6509] |
| Natalus      | CCCTGGGGAGGGTGAATCTAAGCAGCCCCGCCCCGCTACTGGGGGA----  | [6506] |
| Rhinolophus  | SGCTGGGAAGGATGAGTCTAAGCAACCTGCAGGGTTGCTAGGGGA----   | [6542] |
| Rousettus    | CCTCAGGGATAGTGAGTCTAAGCAGCCCCACAGGGTCCCTGGGGGA----  | [6515] |
| NycterisT    | CCCTGGGGAGGGTGAATCTAAGCAGTCCGCCAGGTTTCTGGGGGA----   | [6482] |
| Nyctimene    | CCTCAGGGACAGTGAGTCTAAGCAGCCCCACAGGGTCCCTGGGGGA----  | [6530] |
| Mole         | CCCTGGGAAGAGTAAAGTTAAGCAGTCCCGCCAGGTCCCTGGTGGAACTT  | [6546] |
| Horse        | CCCTGGGGAGGGTGGGTCTAAGCAGCCCCACCCAGTCCCTGCAGGAGCTT  | [6543] |
| Desmodus     | CCCTGGGGAGGGTAGATCTAAGCAGCCCCACCTGGTCCGCTGGAGGA---- | [6482] |
| Rhinopoma    | CCCTGGGAAGGGTGAATCTAAGCAGCCCCGCGGGTGCCTGAGGGA----   | [6551] |
| Emballonura  | CCCTGGGGTGGGTGAATCTAAGCAGCCCTCGCCGGGTCCCTGGGAGA---- | [6488] |
| Cow          | GCCTGGGGAGAGGGAGTCTAAGCAGCCACACCTGTCCCTGGGGAAAGTTT  | [6534] |
| Pangolin     | CCCTCGTGAGGGTGAATCTAAGCAGCCCTGTGGGTCCCTGGGGGA----   | [6536] |
| Whale        | CCCTGGGGAGCGTGGGTCTAAGCAGCCCCGCTGTCCCTGGGGAAAGTTT   | [6534] |

[ 6610 6620 6630 6640 6650 ]  
[ . . . . . ]

|              |                                                     |        |
|--------------|-----------------------------------------------------|--------|
| Tonatia      | --GCCTCAGTCAAACAGCCAACCCTGGCCTCTCATTGGGCTGCTCCGGGA  | [6521] |
| Myotis       | --ACATCGGCCAAACTGCCACCCCTGCCTCCCATCTGGTTGCTTCTGAA   | [6560] |
| Tadarida     | --GCCTCTGCCAAACTGCCAACCCCTGGCCTCCCATTGGTTGCTTCTGGA  | [6548] |
| Taphozous    | --GCCTCGACAAACTGCCAACCCCTGCCTCCCACCTGGGCTGCTTCTGGA  | [6548] |
| Megaderma    | --GCGTCAGCCAAATTGCCAACCCCTGGCCTCTCATCTGGATGCTTCCGGA | [6563] |
| Cynopterus   | --CCGTCA-----ACCTGCCTCTTGTCTGCCTGCTTCTGGA           | [6563] |
| Pteropus     | --CCATCA-----ACCATGGCCTCTGTTTGGCTGCCTCTGGA          | [6548] |
| Hipposideros | --GCATCGGCCAAACTGTCAACCTTGGCCTCTCATCAGGCTGCTTCCGGA  | [6599] |
| Cat          | --ACTTCAACCAAATGCCAACCCCTGGCCTCT---CTGGCTGCTTCTGGA  | [6599] |
| Human        | TGGCTCAGCCAAACTGCCAGCCCTGGCCTCT---GTGGCTTCTGCCAGA   | [6599] |
| Mouse        | CAGCCTCGGCTAAAGTGCCACCCCTGGTCTCTCCTCTATCTTCTGTGGA   | [6500] |

|             |                                                      |        |
|-------------|------------------------------------------------------|--------|
| Flyinglemur | TGGCTTCAGCCAAGCTGCCAGCCAGGCCTCTCCGCTGGCTTCTGCGGGA    | [6611] |
| NycterisG   | --GCG---GCCAAACTGCCAACGCTGGCCTCCCATTTGGCTGCTTCYGGA   | [6503] |
| Antrozous   | --ACGTGCGCCAAACTGCCGACCCCTGGTCTCCCATTTGGTTGCTTCTGAA  | [6551] |
| Rhogeessa   | --ACGTGAGCCAAATGCGGACCCCTGGCCTCCCATTTGGTTGCTTCTGAA   | [6569] |
| Noctilio    | --ACCTCAGTCAAACCTGCCAACCCCTGGCCTCTCATTTGGCTGCTTCCGGA | [6557] |
| Natalus     | --GCATCAGCCAAACTGCCAACCCCTGGTCTCTCGTTTGGCTGCTTCCACA  | [6554] |
| Rhinolophus | --GCATCAGCCAAACTGTCAAACCCCTGGCCTCTCATGAGGCAGCTTCCGGA | [6590] |
| Rousettus   | --CCGTCA-----ACCCTGGCCTCTTGTCTGGCTGCCTCTGGA          | [6551] |
| NycterisT   | --GCG---GCCAAACTGCCAACGCTGGCCTCCCATTTGGCTGCTTCCGGA   | [6527] |
| Nyctimene   | --CCGTCA-----ACCCTGGCCTCTTGTCTGGCTACCTCTGGA          | [6566] |
| Mole        | TAGCCTCAGCCAAAGTGCCAAACCCCTGGCCGCTCATCTGTTGCTGCCGGA  | [6596] |
| Horse       | CAGCCTCAGCCAAACTGCCCACTGTGGCCTCTTGTCTGGCTGCTGCCGGA   | [6593] |
| Desmodus    | --GCCTCAGTCAAACAGCCAACCCCTGGCCCCCTATTGGCTGCTTCCGGA   | [6530] |
| Rhinopoma   | --CGTTCAGCCAAACTGCCAACCCCTGGCCTCACATCTGCCTGCTTCCGGA  | [6599] |
| Emballonura | --TCTCGGCCAAACTGCCAACCCCTAGCCTCCCATTTGGCTACTTCCGGA   | [6536] |
| Cow         | CAGACTCAGCCAAACTGCCAACCTTGGCCTCTCAACTGGCTACTCCTGGA   | [6584] |
| Pangolin    | --GCTTCAGCTACACTGCCAACCCCTGGCTTCT---CTGGCCGCTTCTGGA  | [6581] |
| Whale       | CAGCCTCAGCCAGATTGCCAACTCTGGCCTCTCAACTGGCTACTGCTGGA   | [6584] |

|   |      |      |      |      |       |
|---|------|------|------|------|-------|
| [ | 6660 | 6670 | 6680 | 6690 | 6700] |
| [ | .    | .    | .    | .    | .]    |

|              |                                                     |        |
|--------------|-----------------------------------------------------|--------|
| Tonatia      | GAGGCCAATGGACACTCCAAGTCC---ACTGGGGAGAAGGAGCAGGGGAG  | [6568] |
| Myotis       | GAGGCCAATGGGCTCTCTAAGCCC---ACTGGGGAG---GAGCAGGTAGG  | [6604] |
| Tadarida     | GAGGCCAATGGACACTCTAAGCCA---ACTGGGGAAAAGGAGYATGGAGG  | [6595] |
| Taphozous    | GAGGCCAATGGACACTCTAAGCCC---ACTGGAGAGAAGGAGCAAGGGGG  | [6595] |
| Megaderma    | GAGGCCAACGGACACTCCAAGCCC---AATGGGGAGAAGGAGCAGGAGGG  | [6610] |
| Cynoapterus  | GAGGCCGCGACAGCCCTCCAAGCCC---ACTGGGGAGAAGGAGCAGGGGGA | [6610] |
| Pteropus     | GAGGCCAGCAGACACTCCAAGCCC---ACTGGSGAGAAGGAGCAGGGGGA  | [6595] |
| Hipposideros | GAGGCCAACGGACACACCAAGCCC---AATGGGAAGAAGGAGCAGGGGGA  | [6646] |
| Cat          | GAGGCCAATGGTCACTCCAAGCCC---ACTGGGGCGAAGGAGGAGGGGGA  | [6646] |
| Human        | GAGGTCAACGGACACTCGAAGTCC---ACTGGGGAGAAGGAGGAGGGGGA  | [6646] |
| Mouse        | GAGGCTAATGGACACTCCAAGCCT---CCAAGGGAGAAGGAGGAGGGGGA  | [6547] |
| Flyinglemur  | GAGGCCAATGGACAGTCCAAACCC---ACTGGGGAGAAGGAGGAGGGGGA  | [6658] |
| NycterisG    | GAGGCCAATGGACACTCTAAGCCC---GCTGGGGAGAAGGAGGCAGGG--  | [6548] |
| Antrozous    | GAKGCCAATGGACACTCTAAGCCC---ACTGGGAAGAAAGAGCAGGTAGG  | [6598] |
| Rhogeessa    | GAGGCCAATGGACACTCTAAGCCC---ACTGGGCAGAAGAGCAAGTAGG   | [6616] |
| Noctilio     | GAGGCCAATGGACACTCTAAGTCC---ACCGGGGAGAAGGAGCAAGGGAG  | [6604] |
| Natalus      | GAGGCCAATGGACACTCTAAGCCC---ACTGGGGAGAAGGAGCAGGGAGG  | [6601] |
| Rhinolophus  | GAGGACAACGAGCACTCCAAGCCC---AATGGGGAGAAGGAGCAGGGGGA  | [6637] |
| Rousettus    | GAGGCCAGCAGACACTCCAAGCCC---ACTGGGGAGAAGGAGCAGGGGGA  | [6598] |
| NycterisT    | GAGGCCAATGGACACTCTAAGCCC---GCTGGGGAGAAGGAGGCAGGG--  | [6572] |
| Nyctimene    | GAGGCCAGCAGACGCTCCAAGCCC---ACTAAGGAGAAGGAGCAGGGGGA  | [6613] |
| Mole         | GAGACCAATGGACGCTCCAAGCCC---ACTGGGGAGAAGGAAATGGGGGA  | [6643] |
| Horse        | GAGGCCAATGGACACTCCGAGCCC---ACTGGGGAGAAG---GAGGCAGA  | [6637] |
| Desmodus     | GAGGCCAATGGACACTCTAAGTCC---ACTGGGGAGAAGGAGCAGGGGAG  | [6577] |
| Rhinopoma    | GAGGCCAACGGACACTCCAAGCCC---AATGGGGAGAAGGAGCAGGGGGA  | [6646] |
| Emballonura  | GAGGCCAATGGACACTCCAAGCCC---ACTGGAGAGAAGGAGCAAGGGGG  | [6583] |
| Cow          | GAGGCCAACGGATGCTCCCAACCTCGCCAGGGGAGAAGGGTACGGGGGA   | [6634] |
| Pangolin     | GAGGCCAATGGACACTCCAAGCCC---ATTGGGGAGAAGGAGAGGGGGGA  | [6628] |
| Whale        | GAGGCCAATGGATGCTCCAGCCC---ACTGGGCAGAAGGAGCAGGGGGGA  | [6631] |

|   |      |      |      |      |       |
|---|------|------|------|------|-------|
| [ | 6710 | 6720 | 6730 | 6740 | 6750] |
| [ | .    | .    | .    | .    | .]    |

|              |                                                     |        |
|--------------|-----------------------------------------------------|--------|
| Tonatia      | GACCCCTGAAGACCCCTGCGAGCCCTGCCTTGCCACCCAGCTGGCCTTCCC | [6618] |
| Myotis       | GACCCCTGAAGATCCTGGGAACCCAGCCTTGCCATCCAGCTGGCCTGCC   | [6654] |
| Tadarida     | GACCCCTGAAGATCCTGGGAACCCGCGCTTGCCACCCAGTTGGCCCGCCC  | [6645] |
| Taphozous    | GACCCCTGAAGATCCTGGGAGCCCTGCCTTGCCACCCCTGCTGGCCTGCC  | [6645] |
| Megaderma    | GACCCCTGACGATCCTGGGAGCCCTACCTTGACACCCAGATGGCCTACCT  | [6660] |
| Cynoapterus  | AACC---GAAGATCCTGGGAGCCCTGCCCTGCCACCTAGCTGGCCTGCC   | [6657] |
| Pteropus     | GACC---GAAGATCCTGRGAGCYCCGCCCTGCCACCCAGCTGGCCTGCC   | [6642] |
| Hipposideros | GACCCCTGAAGATCCTGGGAGCCCTACCTTGCCACCCACCTGGCCTGCC   | [6696] |
| Cat          | GACCCCTGAAGATCCTGCCACCCCTGCCTTGCCACCCAGCTGGTCCGCC   | [6696] |
| Human        | GACCCCTGAAGATACTGGGACCCGGGCTTGCCACCCAGTTGGGCTGCC    | [6696] |
| Mouse        | GACCCCTGAAGATCCCGAAGCCAGGGCTTTGCCACCCAATTGGTCTGCC   | [6597] |
| Flyinglemur  | GATCTCTGAAGATCCTGGGACCCAGACCTTGCCACCCAGCTGGACTGCTC  | [6708] |
| NycterisG    | -ACCCCTGAAGATTCTGGGAGCCCCACCTTGCCACCCAGCTGGCCTGCC   | [6597] |
| Antrozous    | GACCCCTGAAGATCCTGGGAACCCAGCCTTGCCATCCAGCTGGCCTGCC   | [6648] |
| Rhogeessa    | GACCCCTGAAGATACTGGGAACCCAGCCTTGCCATCCAGCTGGCCTGTCC  | [6666] |
| Noctilio     | GACCCCTGAAGACCCCTGGGAGCCACCTTGCCACCCAGCTGGCCTGCC    | [6654] |
| Natalus      | GACCCCTGAAGACCCCTGGAAACTCTGTTTGGCCACCAACTGGCCTGCC   | [6651] |
| Rhinolophus  | GACCCCTGAAGATCCTGGGATCCCCACCTTGCCACCCATCTGGCCTGCC   | [6687] |

|             |                                                    |        |
|-------------|----------------------------------------------------|--------|
| Rousettus   | GACG---GAAGATCCTGGGAGCCCTGCCTGCCACCTAGCTGGCCTGCC   | [6645] |
| NycterisT   | -ACCCCTGAAGATTCTGGGAGCCCCACCTTGCCACCCAGCTGGCCTGCC  | [6621] |
| Nyctimene   | AAC---GAAGATCCTGGGAGCCCTGTCTGCCACCCAGCTGGCCTGACC   | [6660] |
| Mole        | GACCCCTGAAGATTCTGGAACTTCTACCTTGCCACCCAGCTGGCCTGTCT | [6693] |
| Horse       | GACCCCTGAAATCTGGGAGCCCTGCCTTGCC?CCAGCTGGCCTGCC     | [6687] |
| Desmodus    | GACCCCTGAAGATCCTGGGAGCCCCGCCTTGCCACCCAGCTGGACTTCCC | [6627] |
| Rhinopoma   | GACCCCTGAAGATCCTGGGAGCCCACTTGCCACCCAGCTGGTCTGCC    | [6696] |
| Emballonura | GACCGTGAAGATCCTGGGAGCCCTGCCTTGCCACCCAGCTGGCCTGCC   | [6633] |
| Cow         | GACCCCTGAAGCCCTGGCACTCCTGCCTTGCCACCCAGCTGGCCTGCCA  | [6684] |
| Pangolin    | GACCCCTGAAGATCCAGGACTCCCGCCTTGCCACCCAGCTGGTCTGCC   | [6678] |
| Whale       | GACCCCTGAAGACCTGGGACCCCGCCTTGCCCCCAGCTGGCCTGCC     | [6681] |

[ 6760 6770 6780 6790 6800 ]  
[ . . . . . ]

|              |                                                      |        |
|--------------|------------------------------------------------------|--------|
| Tonatia      | TTCCCCAAGCACACCAGGACCCGAAGGAAGGTGTCTGTGGACCATCTCCT   | [6668] |
| Myotis       | TTCCCCATGCAGACCAGGGTCCAAAGGAAGGTGTTTGTGGGGCGTCTCCA   | [6704] |
| Tadarida     | TTCCCCATGCAGGCCAGGGCTGAAGGAAGGTGTTTGTGAGGCATCTCCA    | [6695] |
| Taphozous    | TTCCCCATGCAGGCCAGGGACCGAAGGAAGGTGTTTGTGGGGCATCCCCG   | [6695] |
| Megaderma    | TTCCCCAGGCAGGCCAGGGTCGAAGGAAGGAGTTTGTGGGGCATCTCTG    | [6710] |
| Cynopterus   | TTCCCCATGGAGGCCAGAGTCCGAAAGAAGCAGTTTGTGGGGTGTCTCTG   | [6707] |
| Pteropus     | TTCCCCATGCAGGCCAGAGTCCGAAGGAAGCAGTTTGTGGGGTGTCTCTG   | [6692] |
| Hipposideros | TTCCCCATGCAGGCCAGGGTCCGAAGGAAGGAGTTTGTGGAGTGTCTCCG   | [6746] |
| Cat          | TTCCCAACTCAGGCCAGGGTCCGAAGGAAGGTGTTTGTGGGGCATCTCCA   | [6746] |
| Human        | TTCCCAACTCAGGCCAGGGCCAGAAGGAGGGTGTGTTTGTGGGGCATCTCCA | [6746] |
| Mouse        | TGCCCAGATCAGTCCAGGACCCAGAAGGAAGGGACTAGTGGGGCAACTGCA  | [6647] |
| Flyinglemur  | TTCCCAACTCAGGCCAGGGCCAGAAGGAGGGTGTGTTTGTGGGGCGTCTCCA | [6758] |
| NycterisG    | TTCCCCATGCAGGCCCTTGGACCGAAGGAAGGTGTGTGTGGAGCGTCTCCA  | [6647] |
| Antrozous    | TCCCCATGCAAACCAGGGTCCAAAGGAAGGTGTTTGTGGAGTGTCTCCA    | [6698] |
| Rhogeessa    | TCCCCATGCAGACCAGGGTCCAAAGGAAGGTGTTTGTGGGGTGTCTCCG    | [6716] |
| Noctilio     | TTCCCCATGAGGGCCAGGGTCCAAAGGAAGGTGTGGTGGGGTGTCTCCA    | [6704] |
| Natalus      | TTCCCCATGCAGGCCAGGGACAAAAGGAAGGTGTTTGTGGGGCATCTGTG   | [6701] |
| Rhinolophus  | TTCCCCACGCAGGCCAGGGTCCACGGAAGGAGTTTGTGGGGCGTCTCCA    | [6737] |
| Rousettus    | TTCCCCATGCAGGCCAGAATCTGAAGGAAGCAGTTTGTGGGGTGTCTCTG   | [6695] |
| NycterisT    | TTCCCCATGCAGGCCCTTGGGCCGAAGGAAGGTGTGTGTGGAGCGTCTCCA  | [6671] |
| Nyctimene    | TTCCCCATGCAGGCCAGAGTCTGAAGGAAGCAGTTTGTGGGGTGTCTCTG   | [6710] |
| Mole         | TTCCCAACTCAGGCCAAGATCAAAGGAAGGTATTTTGTGAGGCATCTCTG   | [6743] |
| Horse        | TTCTAGTTTTCAGGCCAGGATCAGAAGGAAGGAGTTTGTGGGGCATCTCTG  | [6737] |
| Desmodus     | TTCCCCGTGCATGCCAGGATCTGAAGGAAGGTGTCTGTGGACCATCTCTA   | [6677] |
| Rhinopoma    | TTCTCCCCCAGGCCAGGATCCGAAGGAGGGAGTTTGTGGGGCATCTCTG    | [6746] |
| Emballonura  | TTCCCCATGCAGGCCAGGGAGGGAAGCAAGGTGTTTGTGGGGCTTCCCCA   | [6683] |
| Cow          | TCCCCAAGTCCAGGCCAGGGTCCGAAGGAAGGGGTCTGTGGTTTCATCTCCG | [6734] |
| Pangolin     | TTCCCAACTCAGTCCAGGGTCCGAAGGAAGGTGTTTGTGGGGCATCTCCG   | [6728] |
| Whale        | GTCCCAGTCCAGGCCAGAGTCCGAAGGAAGGTGTGGTGGGACATCTCCA    | [6731] |

[ 6810 6820 6830 6840 6850 ]  
[ . . . . . ]

|              |                                                     |        |
|--------------|-----------------------------------------------------|--------|
| Tonatia      | GAGGATGAAGTTGGAGAGGAGGAGGAGGAAGAGGAGGAGGAGGATGA     | [6718] |
| Myotis       | GAGGAGGAAGTTGAAGAGGAGGAGGAGGAAGAGGAGGAGGAG-----     | [6746] |
| Tadarida     | GAGGAGGACGTTGGAGAGGAGGAGGAAGAGGAGGAGGAGGAGCAG-----  | [6737] |
| Taphozous    | GAGGAGGAAGTTGGAGAGGAGGAGGAGGATGACGAG-----           | [6731] |
| Megaderma    | GAGGAGGAAGCTGGTGGAGAGGAGGAGGAAGAGGAGGAGGAG-----     | [6752] |
| Cynopterus   | GAGGAGGAGATTGGGAGGAGGAGGAGGAGGAG-----               | [6737] |
| Pteropus     | GAGGAGGAGGKTGGGAGGAGGAGGATGAG-----                  | [6722] |
| Hipposideros | GAGGAGGAAGCTGGTGGGAAGGAGGAAGATGAG-----              | [6779] |
| Cat          | GAGGAAGAAGC---CGAGGAGGAGGAGGAAGAG-----              | [6776] |
| Human        | GAGGATGAAGCTGAAGAGGAGGAAGAGGAGGAGGAGGAGGAGGAAGAG--  | [6794] |
| Mouse        | GAGAAGGGAGCTGAAGAGGATGAAGAGGAGGTGGAAGAA-----        | [6686] |
| Flyinglemur  | GGGAGGAGGCTGAGGAGGCTGAGGAGGAG-----                  | [6788] |
| NycterisG    | GAGGAGGAAGTTAGAGAAGAGGAGGAGGAAGATGAG-----           | [6683] |
| Antrozous    | GAGGAGGAAGTTGAAGAGGAGGAGGAGGAGGAG-----              | [6731] |
| Rhogeessa    | GAGGAGGAAGTTGAAGAGGAGGAGGAGGAGGAGGAAGAGGAAGAG-----  | [6761] |
| Noctilio     | GAAGAAGAAGTTGGAGAGGAGGAGGAGGAAGAGGAGGAGGAGGAGGATGA  | [6754] |
| Natalus      | GAGGAGGAAGTTGGAGAGGAGGAGGAGGAAGTTGGAGAGGAGGAGGAGGA  | [6751] |
| Rhinolophus  | GAAGAGGACGCTGGCAGGAAGAGGAGGATGAG-----               | [6770] |
| Rousettus    | GAGGAGAAATGTTGAGGAGGAGGAGGACAAG-----                | [6725] |
| NycterisT    | GAGGAGGAAGTGGAGAGAGGAGGAGGAGGAAGATGAG-----          | [6707] |
| Nyctimene    | GAGGAGGAGGTTGGGAGGAGGAGGTTGGGAGGAGGAGGAGGAG-----    | [6755] |
| Mole         | GAGGAAGAAGCTGAAGAGGAGGAGGAGGAGGAGGAGGAGGAGGAGGAAGA  | [6793] |
| Horse        | GAGGAGGAAGCTGAAGAGGAGGAGGAGGAGGAGGAGGAGGAGGAGGAGGG  | [6787] |
| Desmodus     | GAAGATGAAGTTGGAGAGGAGGAGGAGGAGGAGGAGGAGGAGGATGACGA  | [6727] |
| Rhinopoma    | GAGGAGGAAGCTGGTGGAGGAGGAGGAGGAGGAGGAGGAGGATGAG----- | [6791] |

Emballonura GAGGTGGAAGTTGGAGAGGAGGAGGAGGATGACGAG----- [6722]  
 Cow GAGGAGGAGGCAGAAGAGGAGGAAGAAGAGGGT----- [6767]  
 Pangolin GAGGAGGAAGCTGAAGAGGAGGAGGAGGAGGAGGAGGAGGAAGAGGAT-- [6776]  
 Whale GAGGAGGAGGGGGCTGAAGAGGAGGAGGAGGAGGG----- [6767]

[ 6860 6870 6880 6890 6900 ]  
 [ . . . . . ]

Tonatia G-----TGTGAGCCTCAG---GCCTTGCCAGCAT [6744]  
 Myotis -----TGTGACCTCAA---GCCTTGCCAGTCT [6771]  
 Tadarida -----TGTGAGCCTCAG---GCCTTGCCAGCGT [6762]  
 Taphozous -----TGTGAGCCTCAG---GCCTTGCCAGCGT [6756]  
 Megaderma -----TGTGAGCCTCAG---GTCTTGCCAGCGT [6777]  
 Cynopterus -----TGTGAGCCTCAG---GCCCTGCCAGCTT [6762]  
 Pteropus -----TGTGAGCCTCAG---GCCCTGCCAGCGT [6747]  
 Hipposideros -----TGTGAGCCTCAG---GTCTTGCCAGCGT [6804]  
 Cat -----TGTGAGCCTCGG---GCCTTGCCAGCAT [6801]  
 Human -----TGTGAACCCAG---GCAGTGCCAGTGT [6819]  
 Mouse -----TGTGAACCCAA---ACACTGCCAGCTT [6711]  
 Flyinglemur -----TGTGAGCCAG---GCCCTGCCAGTGT [6813]  
 NycterisG -----TGTGAGCCTCAG---GCCTTGCCAGTGT [6708]  
 Antrozous -----TGTGACCTCAG---GCCTTGCCAGTAT [6756]  
 Rhogeessa -----TGTGACCTCAG---GCCTTGCCAGCAT [6786]  
 Noctilio G-----TGTGAGCCTCAG---GCCTTGCCAGCAT [6780]  
 Natalus AGAGGAGGAGGACAGG-----TGTGAGCCTCAG---GCCTTGCCAGCAA [6792]  
 Rhinolophus -----TGTGAGCCTCAG---GTCTTGCCAGTGT [6795]  
 Rousettus -----TGTGAGCCTCAG---GCCCTGCCAGCTT [6750]  
 NycterisT -----TGTGAACCTCAG---GCCTTGCCAGTGT [6732]  
 Nyctimene -----GGTGAGCCTCAGGATGCCCTGTCAGCAT [6783]  
 Mole G-----TGTGAGCCTCAG---GCCTTGCCAGCAT [6819]  
 Horse GGAGGAAGAG-----TGTGAGCCTCAG---GCCTTGCCAGCAT [6822]  
 Desmodus TGAG-----TGTGAGCCTCAG---GCCTTGCCAGCAT [6756]  
 Rhinopoma -----TGTGAGCCTCAG---GTCTTGCCAGCGT [6816]  
 Emballonura -----TGTGAGCCTCAG---GCCTTGCCAGCAT [6747]  
 Cow -----TGTGAGCCGAG---GCCTTGCCAGCGT [6792]  
 Pangolin -----CATGAGCCTCAG---GCCTTGCCAGCGT [6801]  
 Whale -----TGTGAGCCGAAG---GCCTTGTCAGCGT [6792]

[ 6910 6920 6930 6940 6950 ]  
 [ . . . . . ]

Tonatia CCCCTGCCTCAGCTTGCAACCCATCCCTGCAGCAGCCACAGGGCTCCCAG [6794]  
 Myotis CCCTGCCTCAGCTTGCAAGCCACGCCTGCAGCAGCCGAGGGCTCCCAG [6821]  
 Tadarida CCCTGCCTCAGCTTGCAAGTCCACCCCTGCAGCAGCCACAGGGCTCCCAA [6812]  
 Taphozous CCCAGCCTCAGCTTGCAAGCCACCCCTGCAGCAGCCACAGGGCTCCCAG [6806]  
 Megaderma CCCTGCCTCAGCTTGCAAGCCCCCCTGCAGCAGCCACAGGGTCCCAG [6827]  
 Cynopterus CCCTGCCTCAGCTTGCAAGCCACCCCTGCAGCAGCCACAGGGCTCCCAG [6812]  
 Pteropus CCCTGCCTCAGCTTGCAAGCCACCCCTGCAGCAGCCACAGGGCTCCAG [6797]  
 Hipposideros CCCCCTCAGCTTGCAAGCCACCCCTGCAGCAGCCACAGGGCTCCCAG [6854]  
 Cat CTCCTGCCTCCGCTGTAGCCACCCCTGCAGCAGCCGAGGGTCCCAG [6851]  
 Human CTCGGCTCAGCTTGCAAGCCACCCCTGCAGCAGCCACAGGGCTCCCAG [6869]  
 Mouse CTCCTGCCTCAGTATTCAACCCACCTTGCAAGCAGCCACAGGGCTCCCAG [6761]  
 Flyinglemur CTCTGCCTCAATTTGCAAGCCACCCCTGCAGCAGCCGAGGGCTCCCAG [6863]  
 NycterisG CCCCTGCCTCAGCTTGCAAGCCACCCCTGCAGCAGCCACAGGGCTCCCAG [6758]  
 Antrozous CCCTGCCTCCGCTTGCAAGCCACCCCTGCAGCAGCCACAGGGCTCCCAG [6806]  
 Rhogeessa CCCTGCCTCAGCTTGCAAGCCACCCCTGCAGCAGCCACAGGGCTCCCAG [6836]  
 Noctilio CCCTGCCTCCGCTTGCAACCCATCCCTGCAGCAGCCGAGGGCTCCCAG [6830]  
 Natalus TCCTGCCTCAGCTTGCAAGCCACCCCTGCAGCAGCCACAGGGCTCCCAG [6842]  
 Rhinolophus CACCTGCCTCAGCTTGCAAGCCACCCCTGCAGCAGCCACAGGGCTCCCAG [6845]  
 Rousettus CCCTGCCTCAGCTTGCAAGCCACCCCTGCAGCAGCCACAGGGCTCCCAG [6800]  
 NycterisT CCCTGCCTCCGCTTGCAAGCCACCCCTGCAGCAGCCACAGGGCTCCCAG [6782]  
 Nyctimene CCCTGCCTCAGCTTGCAAGCCCTCCTGCAGCAGCCACAGGGCTCCCAG [6833]  
 Mole CTCCTGCCTCCGCTTGCAAGCCACCCCTGCAGCAGCCACAGGGCTCCCAG [6869]  
 Horse CTCCTGCCTCAGCTTGCAAGCCACCCCTGCAGCAGCCACAGGGCTCCCAG [6872]  
 Desmodus CCCCTGCCTCAGCTTGCAACCCATCCCTACATCAGCCACAGGGCTCCCAG [6806]  
 Rhinopoma CCCCCTCAGCTTGCAAGCCACCCCTGCAGCAGCCACAGGGCTCCCAG [6866]  
 Emballonura CCCAGCCTCAGCTTGCAAGCCACCCCTGCAGCAGCCACAGGGCTCCCAG [6797]  
 Cow CTCCTGCCTCAGCTTGCAAGCCGCTTGCAAGCAGCCACAGGGTCCCAG [6842]  
 Pangolin CTCCTGCCTCCGCTTGCAAGCCACCCCTGCAGCAGCCACAGGGCTCCCAG [6851]  
 Whale CTCCTGCCTCAGCTTGCAAGCCACCCCTGCAGCAGCCACAGGGCTCCCAG [6842]

[ 6960 6970 6980 6990 7000 ]  
 [ . . . . . ]

|              |                                                    |          |
|--------------|----------------------------------------------------|----------|
| Tonatia      | GTGCTGGCCACCCTGCGTGGCCAGGTGCTCCTGAGCAGGGGTATGGGTGC | [ 6844 ] |
| Myotis       | GTGCTGGCCACCCTGCGTGGCCAGGTGCTCCTGGGCCGGGGTATGGACGC | [ 6871 ] |
| Tadarida     | GTGCTGGCCACCCTTCGTGGCCAGGTGCTCCTGAGCAGGGGTATGGGTGC | [ 6862 ] |
| Taphozous    | GTGCTGGCCACCCTGCGTGGCCAGGTGCTCCTGGGCAGGGGTATGGGTGC | [ 6856 ] |
| Megaderma    | GTGCTGGCCACCCTGCGTGGCCAGGTGCTGCTGGGCAGGGGCATGGGTGC | [ 6877 ] |
| Cynoapterus  | GTCTGGCCACCCTGCGTGGCCAGGTGCTCCTGGGTAAGGGCCTGGGCAC  | [ 6862 ] |
| Pteropus     | GTGCTGGCCACCCTGCGTGGCCAGGTGCTCCTGGGCAGGGGCATGGGCAC | [ 6847 ] |
| Hipposideros | GTGCTGGCCACCCTGCGTGGCCAGGTGCTGCTGGGCAGGGGCATGGGCGC | [ 6904 ] |
| Cat          | GTGCTGGCAACTACGTGGCCAGGTGCTCCTGGGCAGGGGCGTGGGCAC   | [ 6901 ] |
| Human        | GTGCTGGCCACCCTACGTGGCCAGGTGCTCCTGGGCAGGGGCGTGGGTGC | [ 6919 ] |
| Mouse        | GTGCTGGCCACGCTACGTGGCCAGGTGCTTCTGAGCAAGAATGTGGGTGT | [ 6811 ] |
| Flyinglemur  | GTGCTGGCCACCCTACGTGGCCACGCTCCTGGGCAGGGGTATGGGTGC   | [ 6913 ] |
| NycterisG    | GTGCTGGCCACCCTGCGTGGCCAGGTGCTCCTGGGCAGGGGTATGGGCAC | [ 6808 ] |
| Antrozous    | GTGCTGGCCACCCTGCGTGGCCAGGTGCTTCTGGGCAGGGATATGGACGC | [ 6856 ] |
| Rhogeessa    | GTGTTGGCCACCCTGCGTGGCCAGGTGCTCCTGGGTAGGGGTATGGACGC | [ 6886 ] |
| Noctilio     | GTGCTGGCCACCCTTCGTGGCCAGGTGCTTCTGGGCAGGGGTATGGGTGC | [ 6880 ] |
| Natalus      | GTGCTGGCCACTTTCGTGGCCAGGTGCTCCTGGGCAGGCATATGGGTGC  | [ 6892 ] |
| Rhinolophus  | GTGCTGGCCACCCTGCGTGGCCAGGTGCTGCTGGGCAGGGGCATGGGAGC | [ 6895 ] |
| Rousettus    | GTGCTGGCCACCCTGCGAGGCCAGGTGCTCCTGGCCAGGGGCATGGGCAC | [ 6850 ] |
| NycterisT    | GTGCTGGCCACCCTGCGTGGCCAGGTGCTCCTGGGCAGGGGTATGGGCAC | [ 6832 ] |
| Nyctimene    | GTGCTGGCCACCCTGCGTGGCCAGGTGCTCCTGGGCAGGGGCATGGGCAC | [ 6883 ] |
| Mole         | GTGCTGGTACCCTCCGTGGCCAGGTGCTCCTCGGCAGGGGTGCTGGCGC  | [ 6919 ] |
| Horse        | GTGCTGGCGACCCTACGTGGCCAGGTGCTCCTGGGCAGGGGTATGGCCAC | [ 6922 ] |
| Desmodus     | GTGCTGGCCACCCTGCGTGGCCAGGTGCTCCTGGGCAGGGGTATGGGAGC | [ 6856 ] |
| Rhinopoma    | GTGCTGGCCACGCTGCGTGGCCAGGTGCTGTTGGGCAGGGGCATGGGTGC | [ 6916 ] |
| Emballonura  | GTGCTGGCCACCCTGCGTGGCCAGGTGCTCCTGGGCAGGGGTATGGGCGC | [ 6847 ] |
| Cow          | GTGCTGGCAACCCTGCGTGGCCAGGTGCTCCTGGGCAGGGGCACAGGCAC | [ 6892 ] |
| Pangolin     | GTGCTGGCGCACTGCGTGGCCAGGTGCTTCTGGGCAGGGGCGTGGGC    | [ 6901 ] |
| Whale        | CTGCTGGCCACCCTACGTGGCCAGGTGCTCCTGGGCAGGGGCAGGGGCAC | [ 6892 ] |

[ 7010 7020 7030 7040 7050 ]  
[ . . . . . ]

|              |                                                   |          |
|--------------|---------------------------------------------------|----------|
| Tonatia      | TGCC-----AGTGGGCAGTGGTGG-----CGTCGGCGGGCTCAGC     | [ 6879 ] |
| Myotis       | TGCA-----GGTGAAGTGGTGG---CGTCGGCGTCGGCGGGCTCAGC   | [ 6912 ] |
| Tadarida     | TGGG-----GGTGGACGTTGGTGG-----CGAAGCGGGCTCAGC      | [ 6897 ] |
| Taphozous    | TGCA-----AGTGGGCAGTGGTGG-----CGTCGGCGGGCTCAGC     | [ 6891 ] |
| Megaderma    | TATG-----GGTGGGCAGTGGTGG-----CGTCGGCGGGCTCAGC     | [ 6912 ] |
| Cynoapterus  | TGCA-----AGTGGGCAGTGGTGG-----CGTCGGCGGGCTCAGC     | [ 6897 ] |
| Pteropus     | TGCA-----GGTGGGCAGTGGTGG-----CGTCGGCGGGCTCAGC     | [ 6882 ] |
| Hipposideros | TGCA-----GGTGGGCAGTGGTGG-----CGTCGGCGGGCTCAGC     | [ 6939 ] |
| Cat          | CTCG-----AGCGGGCAGTGGTGG-----CGCGCGCGGGCGCAGC     | [ 6936 ] |
| Human        | TATA-----GGTGGGCAGTGGTGG-----CGTCGAAGGGCGCAGC     | [ 6954 ] |
| Mouse        | GGCC-----AGTGGGCAGTGGTGG-----CGCCGTCGGACACAGC     | [ 6846 ] |
| Flyinglemur  | TGTG-----GGCGGGCAGTGGTGG-----CGTCGGCGGGCGCAGC     | [ 6948 ] |
| NycterisG    | CGCG-----GGTGGGCAGTGGTGG-----CGTCGGCGGGCTCAGC     | [ 6843 ] |
| Antrozous    | TGCA-----AGTGGGAAGTGGTGG---CGGTGGCGRAGGCGGGCTCAGC | [ 6897 ] |
| Rhogeessa    | TGCA-----AGTGGGAAGTGGTGG---CGGTGGCGRAGGCGGGCTCAGC | [ 6930 ] |
| Noctilio     | TTCG-----GGTGGGCAGTGGTGG-----CGTCGGCGGGCTCAGC     | [ 6915 ] |
| Natalus      | TGCA-----GGTGGGCAGTGGTGG-----CGTCGGCGGGCTCAGC     | [ 6927 ] |
| Rhinolophus  | TGCA-----GGTGGGCAGTGGTGG-----CGCCGACGGGCTCAGC     | [ 6930 ] |
| Rousettus    | TGCA-----GGTGGGCAGTGGTGG-----CGTCGGCGGGCTCAAC     | [ 6885 ] |
| NycterisT    | GGTG-----GGTGGGCAGTGGTGG-----CGTCGGCGGGCTCAGC     | [ 6867 ] |
| Nyctimene    | TGCA-----AGTGGGCAGTGGTGG-----CGTCGGCGGGCTCAGC     | [ 6918 ] |
| Mole         | TGCA-----AGTGGGCAGTGGTGG-----CGTCGGCGGACACAGC     | [ 6954 ] |
| Horse        | TGCA-----GGTGGGCAGTGGTGG-----CGCGGGCGGGCACAGC     | [ 6957 ] |
| Desmodus     | TGCG-----GGTGGGCAGTGGTGG-----CGTCGGCGGGCTCAGC     | [ 6891 ] |
| Rhinopoma    | TGCA-----GGTGGGCAATGGTGG-----CGTCGGCGGGCTCAGC     | [ 6951 ] |
| Emballonura  | TGCA-----AGTGGTCAGTGGTGG-----CGTCGGCGAGCTCAGC     | [ 6882 ] |
| Cow          | TGCA-----GGGGCGCAGTGGTGG-----CGCGGGCGGACGCAGC     | [ 6927 ] |
| Pangolin     | TGCTGTGGGTAGTGGGCAGTGGTGG-----CGTCGGCGGGCGCAGC    | [ 6942 ] |
| Whale        | TGCG-----GGGGGGCAGTGGTGG-----CGCGGGCGGACGCAGC     | [ 6927 ] |

[ 7060 7070 7080 7090 7100 ]  
[ . . . . . ]

|             |                                                      |          |
|-------------|------------------------------------------------------|----------|
| Tonatia     | TGACCAGGGAGAAGAGGTTACCTTTTGTGCTGGCTGTGGTCATTGGCGTC   | [ 6929 ] |
| Myotis      | TGACCCGGGAGAAGCGGTTACCTTTTGTGCTGTCTGTGGTCATAGGCGCC   | [ 6962 ] |
| Tadarida    | TGACCCGGGAGAAGCGGTTACCTTTTGTGCTGGCCGTGGTCATAGGCGTC   | [ 6947 ] |
| Taphozous   | TGACACGGGAGAAGCGGTTACCTTTTGTGCTGGCCGTGGTCATAGGTC     | [ 6941 ] |
| Megaderma   | TGACCCGAGAGAAGCGGTTACCTTTTGTGCTGGCCGTGGTCATCGGTGTC   | [ 6962 ] |
| Cynoapterus | TGACCCGGGAGAAGCGGTTACCTTTTGTGTTGGCAGTGGTCATTGGTGTGTC | [ 6947 ] |



|              |                                                    |          |
|--------------|----------------------------------------------------|----------|
| Pteropus     | TGACCCGGGAGAAGCGGTTACCTTTGTGTGGCAGTGGTCATYGGCGTC   | [ 6932 ] |
| Hipposideros | TGACCCGAGAGAAGCGGTTACCTTTGTGTGGCGGTGGTCATTGGCGTC   | [ 6989 ] |
| Cat          | TGACTCGGGAGAAGCGGTTACCTTCGTGCTGGCCGTGGTCATCGGCGTT  | [ 6986 ] |
| Human        | TGACCCGGGAGAAGCGGTTACCTTCGTGCTGGCTGTGGTCATTGGCGTT  | [ 7004 ] |
| Mouse        | TGAGCCGAGAGAAGAGGTTACCTTTGTGTGGCGGTGGTCATTGGTGTT   | [ 6896 ] |
| Flyinglemur  | TGAGTCGGGAGAAGCGGTTACCTTCGTGCTGGCCGTGGTCATCGGCGCC  | [ 6998 ] |
| NycterisG    | TGACCCGGGAGAAGCGGTTACCTTTGTGTGGCTGTGGTCATAGGCGTC   | [ 6893 ] |
| Antrozous    | TGACCCGGGAGAAGCGGTTACCTTTGTGTGTCTGTGGTCATAGGCGCC   | [ 6947 ] |
| Rhogeessa    | TGACCCGAGAGAAGCGGTTACCTTTGTGTATCTGTGGTCATAGGCACC   | [ 6980 ] |
| Noctilio     | TGACCCGGGAGAAGAGGTTACCTTTGTGTGGCCGTGGTCATAGGCGTC   | [ 6965 ] |
| Natalus      | TGACCCGGGAGAAGCGGTTACCTTTGTGTGGCTGTGGTCATAGGCGTC   | [ 6977 ] |
| Rhinolophus  | TGACCCGAGAGAAGCGGTTACCTTTGTGTGGCAGTGGTCATTGGCGTC   | [ 6980 ] |
| Rousettus    | TGACCCGGGAGAAGCGGTTACCTTTGTGTGGCAGTGGTCATTGGCGTC   | [ 6935 ] |
| NycterisT    | TGACCCGGGAGAAGCGGTTACCTTTGTGTGGCTGTGGTCATAGGCGTC   | [ 6917 ] |
| Nyctimene    | TGACCCGGGAGAAGCGGTTACCTTTGTGTGGCAGTGGTCATTGGTGTC   | [ 6968 ] |
| Mole         | TATCCCGGAGAAGCGGTTACCTTCGTGCTGGCCGTAGTCATTGGTGTC   | [ 7004 ] |
| Horse        | TGACTCGGGAGAAGCGGTTACCTTCGTGCTGGCCGTGGTCATTGGCGTC  | [ 7007 ] |
| Desmodus     | TGACCCGGGAGAAGAGGTTACCTTTGTGTGGCCGTGGTCATTGGCGTC   | [ 6941 ] |
| Rhinopoma    | TGACCCGAGAGAAGCGGTTACCTTTGTGTGGCGGTGGTCATCGGCGTC   | [ 7001 ] |
| Emballonura  | TGACCCGGGAGAAGCGGTTACCTTTGTGTGGCCGTGGTCATAGGCGTC   | [ 6932 ] |
| Cow          | TGAGCCGAGAGAAGAGGTTACCTTCGTGCTGGCTGTGGTCATCGGTGTC  | [ 6977 ] |
| Pangolin     | TGACCCGGGAGAAGCGGTTACCTTTGTGTGGCTGTGGTGATTGGTGTC   | [ 6992 ] |
| Whale        | TGACCCGGGAGAAGCGGTTACGTTTCGTGCTGGCCGTGGTCATCGGCGTC | [ 6977 ] |

[ 7110 7120 7130 7140 7150 ]  
[ . . . . . ]

|              |                                                     |          |
|--------------|-----------------------------------------------------|----------|
| Tonatia      | TTCTGTCTCTGCTGGTTCCCTTCTTCTTCAGCTACAGTCTGGGTGCCAT   | [ 6979 ] |
| Myotis       | TTTCATGCTCTGCTGGTTCCCTTCTTCTTCAGCTACAGTCTGGGTGCCAT  | [ 7012 ] |
| Tadarida     | TTTGTGCTCTGCTGGTTCCCTTCTTCTTCAGCTACAGCCTGGGTGCCAT   | [ 6997 ] |
| Taphozous    | TTTGTGCTCTGCTGGTTCCCTTCTTCTTCAGCTACAGTCTGGGTGCCAT   | [ 6991 ] |
| Megaderma    | TTCTGTGCTGTGTTGGTTCCCTTCTTCTTCAGCTACAGTCTGGGTGCCAT  | [ 7012 ] |
| Cynopterus   | TTTGTGCTCTGCTGGTTCCCTTCTTCTTCAGCTACAGCCTGGGTGCCAT   | [ 6997 ] |
| Pteropus     | TTTGTCTCTGCTGGTTCCCTTCTTCTTCAGCTACAGCCTCGGTGCCAT    | [ 6982 ] |
| Hipposideros | TTCTGTGCTCTGTTGGTTCCCGTTCTTCTTCAGCTACAGCCTGGGTGCCAT | [ 7039 ] |
| Cat          | TTTGTGCTCTGCTGGTTCCCTTCTTCTTCAGCTATAGCCTGGGTGCCAT   | [ 7036 ] |
| Human        | TTTGTGCTCTGCTGGTTCCCTTCTTCTTCAGCTACAGCCTGGGCGCCAT   | [ 7054 ] |
| Mouse        | TTTGTGGTCTGTTGGTTTCCCTTCTTCTTCAGCTACAGCCTGGGGGCCAT  | [ 6946 ] |
| Flyinglemur  | TTTGTGCTCTGCTGGTTCCCTTCTTCTTCAGCTACAGCCTGGGCGCCAT   | [ 7048 ] |
| NycterisG    | TTCTGTGCTCTGCTGGTTCCCTTCTTCTTCAGCTATAGCCTGGGTGCCAT  | [ 6943 ] |
| Antrozous    | TTTCATGCTCTGCTGGTTCCCTTCTTCTTCAGCTACAGTCTGGGTGCCAT  | [ 6997 ] |
| Rhogeessa    | TTTCATGCTCTGCTGGTTCCCTTCTTCTTCAGCTACAGTCTGGGTGCCAT  | [ 7030 ] |
| Noctilio     | TTTGTGCTCTGCTGGTTCCCTTCTTCTTCAGCTACAGCCTGGGTGCCAT   | [ 7015 ] |
| Natalus      | TTCTGTGCTCTGCTGGTTCCCTTCTTCTTCAGCTACAGTCTGGGTGCCAT  | [ 7027 ] |
| Rhinolophus  | TTCTGTGCTCTGTTGGTTCCCTTCTTCTTCAGCTACAGCCTGGGTGCCAT  | [ 7030 ] |
| Rousettus    | TTTGTGCTCTGCTGGTTCCCTTCTTCTTCAGCTACAGCCTCGGTGCCAT   | [ 6985 ] |
| NycterisT    | TTCTGTGCTCTGCTGGTTCCCTTCTTCTTCAGCTATAGCCTGGGTGCCAT  | [ 6967 ] |
| Nyctimene    | TTTGTGCTCTGCTGGTTCCCTTCTTCTTCAGCTACAGCCTCGGTGCCAT   | [ 7018 ] |
| Mole         | TTTGTGCTCTGCTGGTTCCCTTCTTCTTCAGCTACAGCCTGGGTGCCAT   | [ 7054 ] |
| Horse        | TTCTGTGCTCTGCTGGTTCCCTTCTTCTTCAGCTACAGCCTGGGTGCCAT  | [ 7057 ] |
| Desmodus     | TTTGTGCTCTGCTGGTTCCCTTCTTCTTCAGCTACAGCCTGGGTGCCAT   | [ 6991 ] |
| Rhinopoma    | TTCTGTGCTCTGTTGGTTCCCTTCTTCTTCAGCTACAGCCTG??????    | [ 7051 ] |
| Emballonura  | TTTGTGCTCTGCTGGTTCCCTTCTTCTTCAGCTACAGTCTGGGTGCCAT   | [ 6982 ] |
| Cow          | TTCTGTGCTCTGCTGGTTCCCTTCTTCTTCAGCTACAGCCTGGGTGCCAT  | [ 7027 ] |
| Pangolin     | TTCTGTGCTCTGCTGGTTCCCTTCTTCTTCAGCTACAGCCTGGGTGCCAT  | [ 7042 ] |
| Whale        | TTCTGTGCTCTGCTGGTTCCCTTCTTCTTCAGCTACAGCCTGGGTGCCAT  | [ 7027 ] |

[ 7160 7170 7180 ]  
[ . . . ]

|              |                                       |          |
|--------------|---------------------------------------|----------|
| Tonatia      | CTGCCACAGCACTGCAAGGTGCCCCATGGCCTTTTC  | [ 7016 ] |
| Myotis       | CTGCCGAAGCACTGCAAGGTGCCGCAAGGCCTTTTC  | [ 7049 ] |
| Tadarida     | CTGCCACAGCACTGCAAGGTGCCCCATGGCCTTTTC  | [ 7034 ] |
| Taphozous    | CTGCCGCAAGCACTGCAAGGTGCCCCATGGTCTTTTC | [ 7028 ] |
| Megaderma    | CTGCCGCAAGCACTGCAAGGTGCCCCATGGCCTTTTC | [ 7049 ] |
| Cynopterus   | CTGCCACAACACTGCAAGGTGCCCCATGGCCTTTTC  | [ 7034 ] |
| Pteropus     | CTGCCGCAAGCACTGCAAGGTGCCCCATGGCCTTTTC | [ 7019 ] |
| Hipposideros | CTGCCACAGCACTGCAAGGTGCCCCATGGCCTTTTC  | [ 7076 ] |
| Cat          | CTGCCACAGCACTGCAAGGTGCCCCATGGCCTTTTC  | [ 7073 ] |
| Human        | CTGCCGAAGCACTGCAAGGTGCCCCATGGCCTTTTC  | [ 7091 ] |
| Mouse        | CTGCCACAGCACTGCAAGGTACCCCATGGCCTTTTC  | [ 6983 ] |
| Flyinglemur  | CTGCCCTCAGCGCTGCAAGGTACCCCATGGCCTTTTC | [ 7085 ] |
| NycterisG    | CTGCCACAGCACTGCAAGGTGCCCCATGGCCTTTTC  | [ 6980 ] |

```

Antrozous      CTGCCCAGCAAGCACTGCAAGGTGCCACAAGGCCTTTTC [ 7034 ]
Rhoqeessa     CTGCCCAGCAAGCACTGCAAGGTGCCACAAGGCCTTTTC [ 7067 ]
Noctilio      CTGCCCACAGCATGCAAGGTCCCCCATGGCCTCTTC [ 7052 ]
Natalus       CTGCCCACAGCACTGCAAGGTACCCCATGG?????? [ 7064 ]
Rhinolophus   CTGCCCACAGCACTGCAAGGTGCCCCATGGCCTGTTTC [ 7067 ]
Rousettus     CTGCCCAGCAAGCACTGCAAGGTGCCCCATGGCCTTTTC [ 7022 ]
NycterisT     CTGCCCACAGCACTGCAAGGTGCCCCATGGCCTTTTC [ 7004 ]
Nyctimene     CTGCCCAGCAAGCACTGCAAGGTGCCCCATGGCCTTTTC [ 7055 ]
Mole          CTGCCCACAGCAATGCAAGGTGCCCCATGACCTCTTC [ 7091 ]
Horse         CTGCCCCAGCACTGCAAGGTGCCCCACGGCCTCTTC [ 7094 ]
Desmodus      CTGCCCACAGCACTGCAAGGTGCCCCATGGCC????? [ 7028 ]
Rhinopoma     ????????????????????????????????????? [ 7088 ]
Emballonura   CTGCCCAGCAAGCACTGCAAGGTGCCCCACAGCCTGTTTC [ 7019 ]
Cow           CTGCCCAGCAAGCACTGCAAGGTGCCCCACGGCCTCTTC [ 7064 ]
Pangolin      CTGCCCACAGCACTGCAAGGTGCCCCACGGTCTCTTC [ 7079 ]
Whale         CTGCCCTCAGCACTGCAAGGTGCCCCACGGCCTCTTC [ 7064 ]
;
END;

```

```
BEGIN ASSUMPTIONS;
```

```

CHARSET brca1 = 1-2882;
CHARSET rag1 = 2883-3958;
CHARSET rag2 = 3959-4712;
CHARSET vwf = 4713-5954;
CHARSET a2ab = 5955-7187;
CHARSET rag1_and_rag2 = 2883-4712;
CHARSET Ambiguous_BRCA1 = 2350-2413;
CHARSET Ambiguous_A2AB = 6813-6872;

```

```
END;
```
