# Supplementary material
Source: PubMed Central journal article supplement (PMC122208)
Supplement: pnas_022477199_13.pdf [file pnas_022477199_13.pdf]

Supporting information for Teeling *et al.* (January 22, 2002) *Proc. Natl. Acad. Sci. USA*, 10.1073/pnas.022477199.

**Table 5. Museum voucher / field collection numbers for bat samples**

|                                  |                                   |
|----------------------------------|-----------------------------------|
| <i>Cynopterus sphinx</i> *       | TK 21113                          |
| <i>Pteropus rayneri</i>          | AM 19218 / AM 19221 /<br>AM 19217 |
| <i>Pteropus hypomelanus</i>      | TK 20057                          |
| <i>Rousettus amplexicaudatus</i> | AM 23046 / AM 23045               |
| <i>Nyctimene albiventer</i>      | AM 19433 / AM 19470               |
| <i>Rhinolophus creaghi</i>       | UWZM T 1286                       |
| <i>Hipposideros commersoni</i>   | TK 21568                          |
| <i>Megaderma lyra</i>            | TK 21138                          |
| <i>Nycteris grandis</i>          | TK 21556                          |
| <i>Nycteris thebaica</i>         | DM 4582 / DM 4578                 |
| <i>Rhinopoma hardwickei</i>      | TK 25643 / TK 25612               |
| <i>Emballonura atrata</i>        | UWZM 2119                         |
| <i>Taphozous nudiventris</i>     | TK 16602                          |
| <i>Tonatia bidens</i> †          | TK 10418                          |
| <i>Desmodus rotundus</i>         | UWZM 2121                         |
| <i>Noctilio albiventris</i>      | UWZM 1921                         |
| <i>Antrozous pallidus</i>        | TK 24740-3                        |
| <i>Rhogeessa tumida</i>          | UWZM 1920                         |
| <i>Myotis daubentoni</i>         | 322-96 QUB/JR                     |
| <i>Myotis velifer</i>            | TK 11931-35 / TK<br>11966- 72     |
| <i>Natalus stramineus</i>        | TK 15664                          |
| <i>Tadarida brasiliensis</i>     | TK 11869-75                       |

---

TK, Texas Technical University Museum; AM, Australian Museum, Sydney; UWZM, University of Wisconsin Zoological Museum; DM, Durban Natural History Museum, South Africa; QUB/JR, Field number from the Queen's University of Belfast, Jon Russ's collection.

\*TK21113 is a tissue sample from TK. The voucher specimen is housed at the Carnegie Museum (accession number CMNH 88359). The animal is from Thailand, Uthai Thani Province, Lan Saka District, Hua Kha Khang Wildlife Sanctuary, Khaonangrum Wildlife Research Station.

†TK10418 was collected in Suriname. According to unpublished data from Dr. Calvin Porter, this specimen may belong to *Tonatia saurophila* rather than *T. bidens*.
