# Supplementary material
Source: PubMed Central journal article supplement (PMC122208)

a

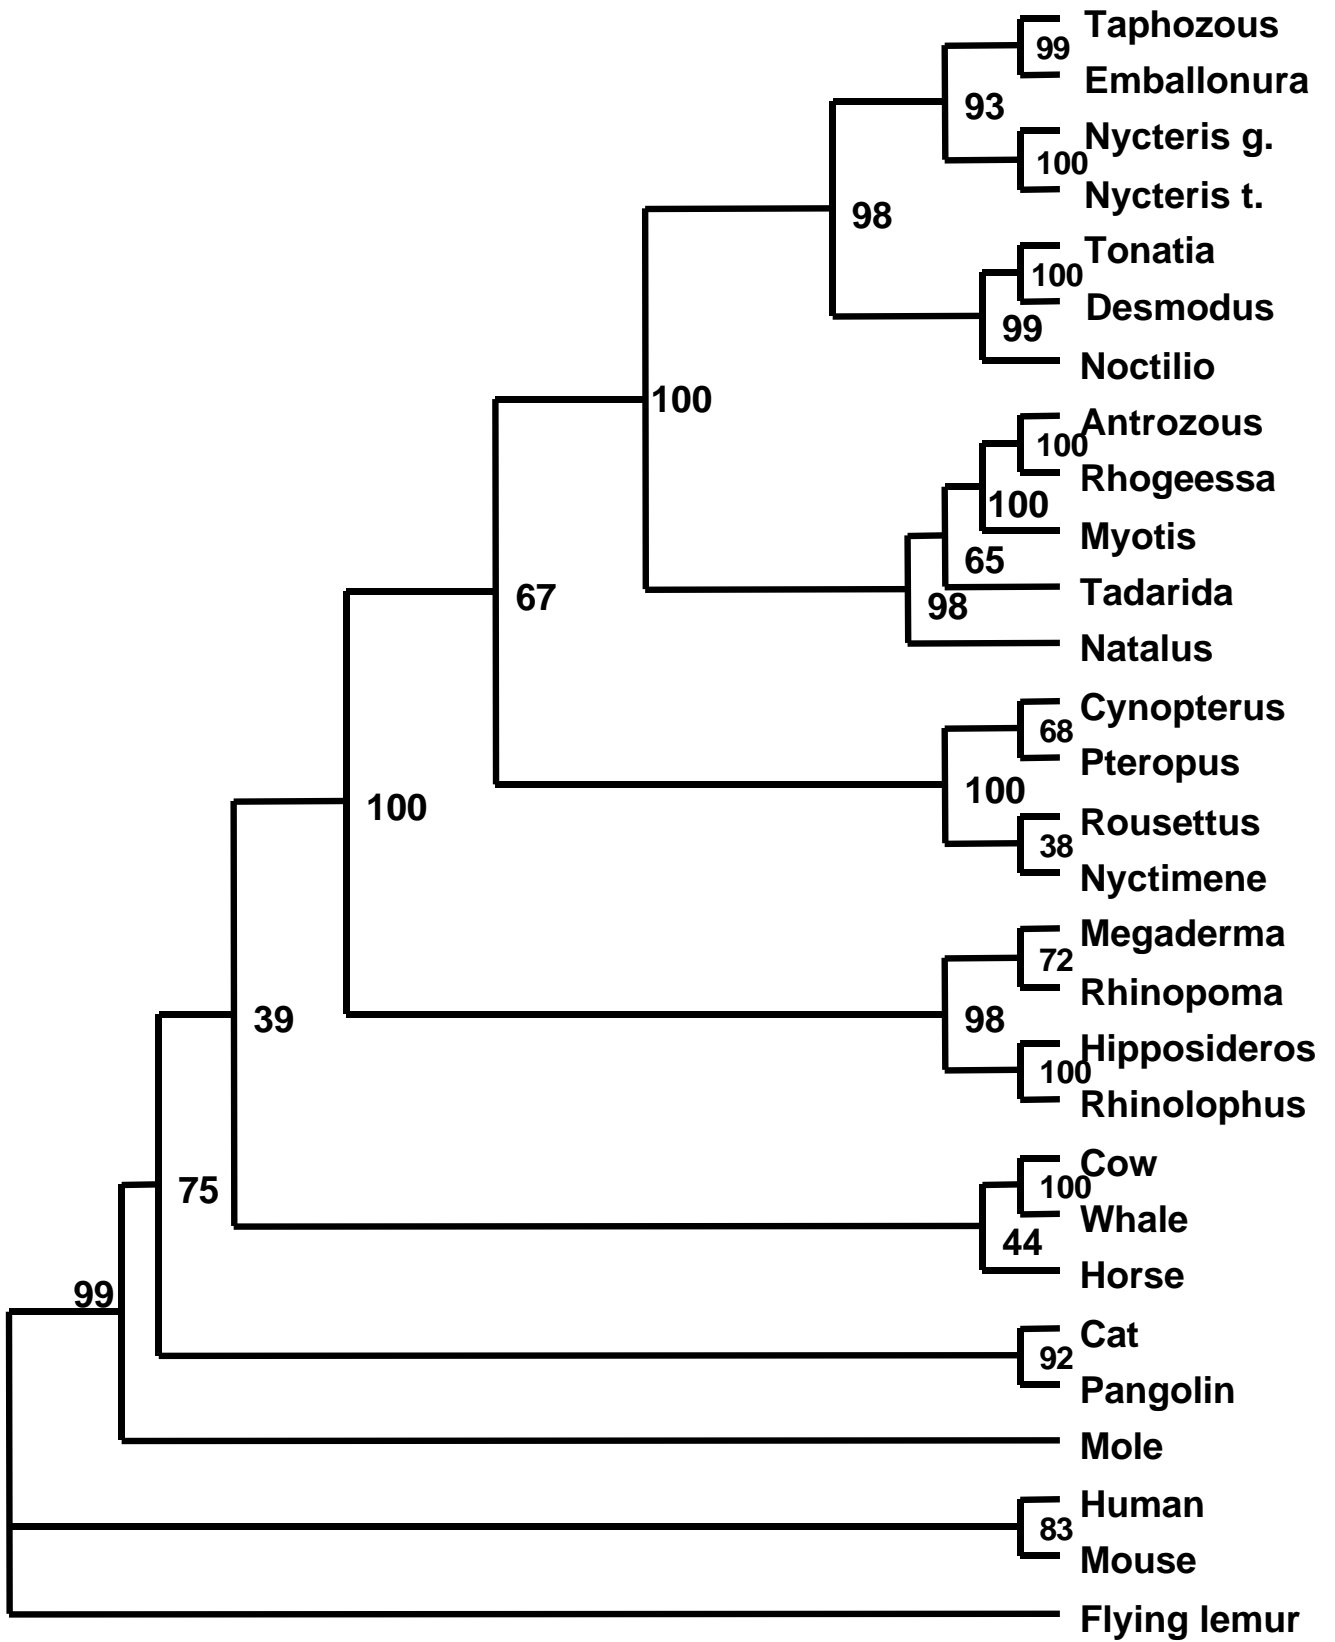

b

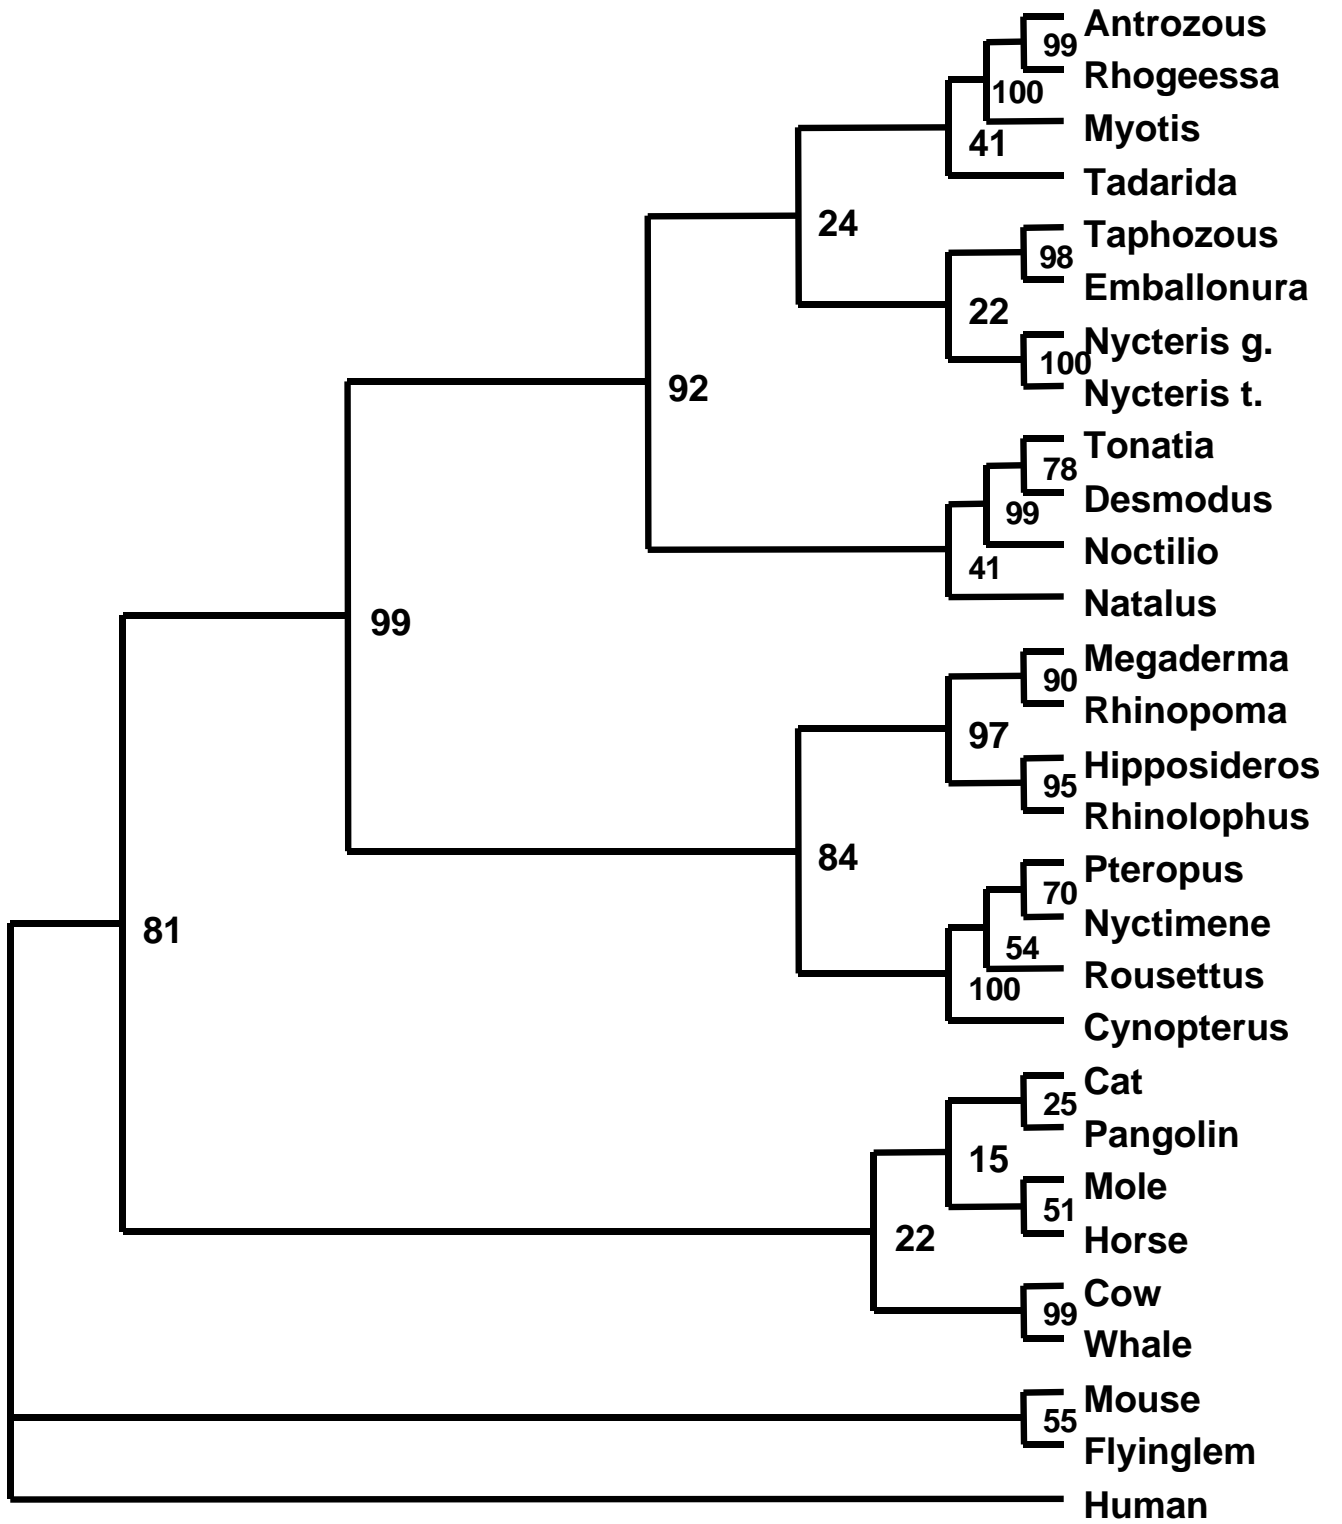

c

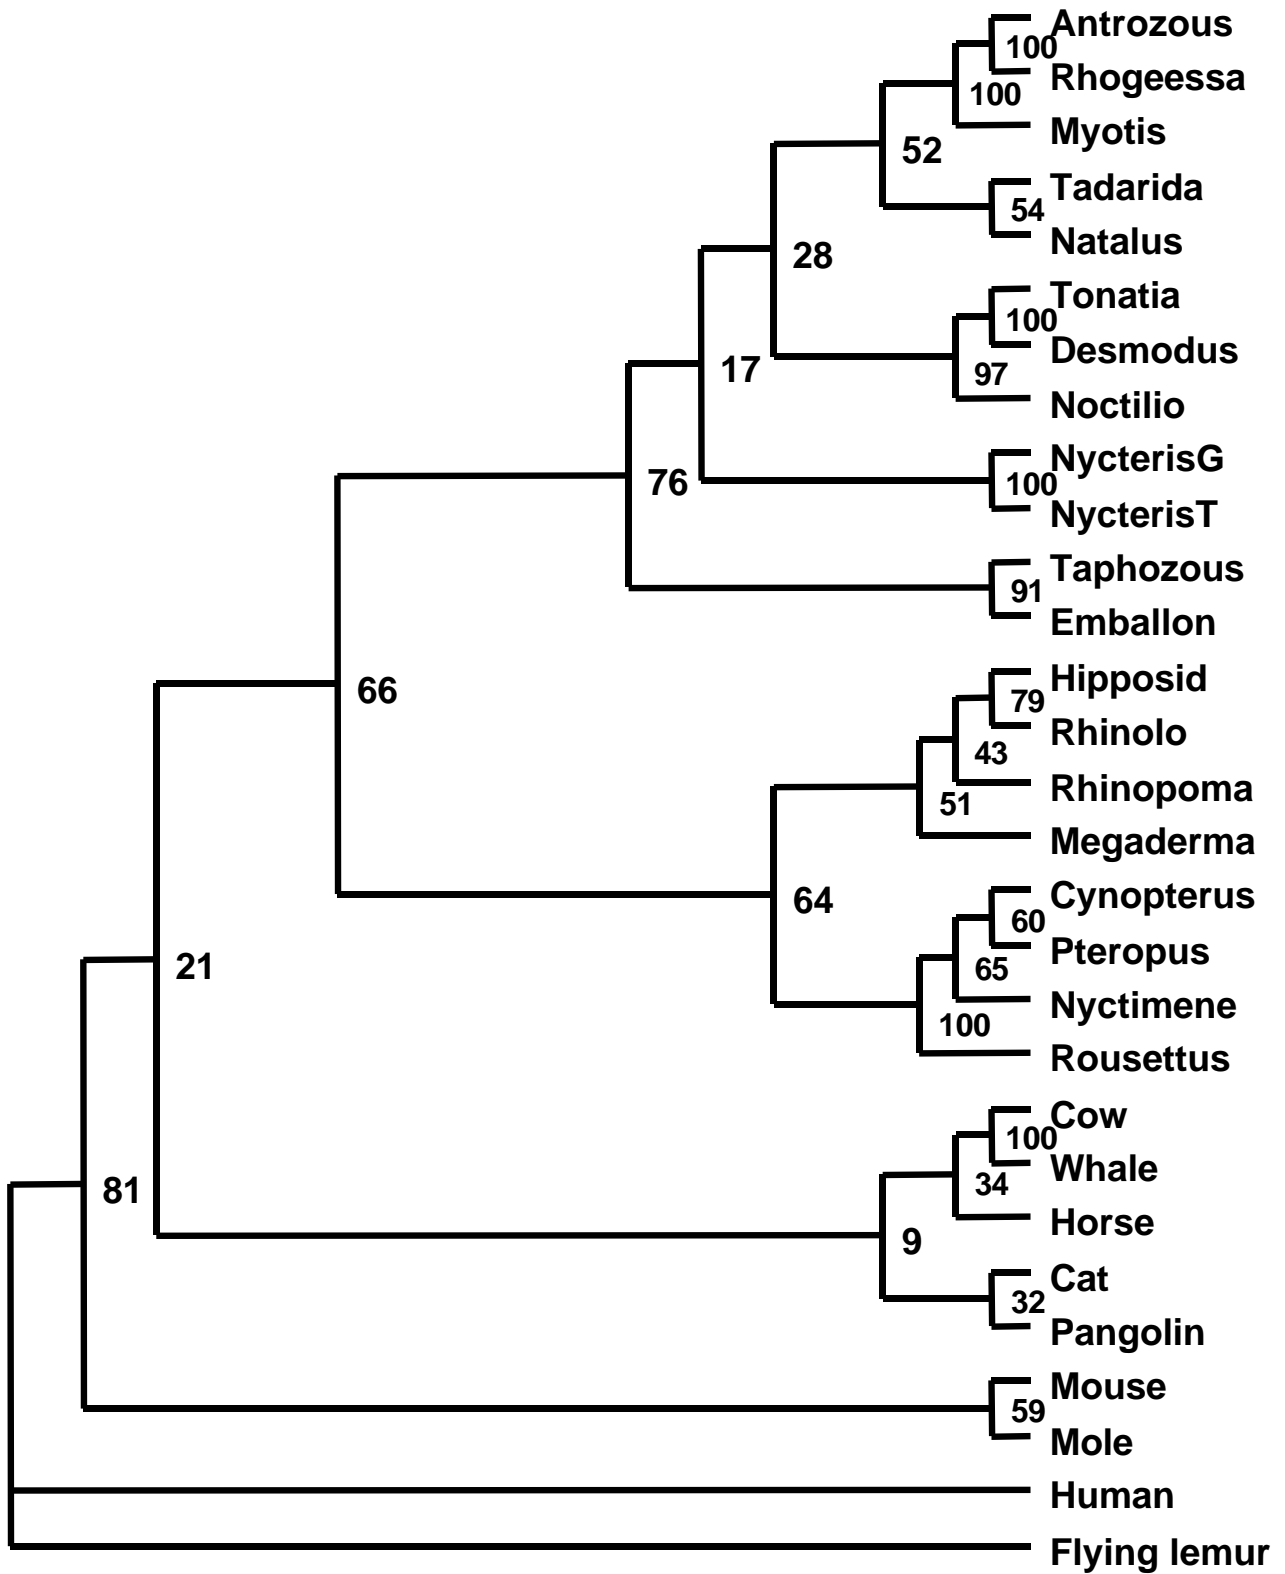

d

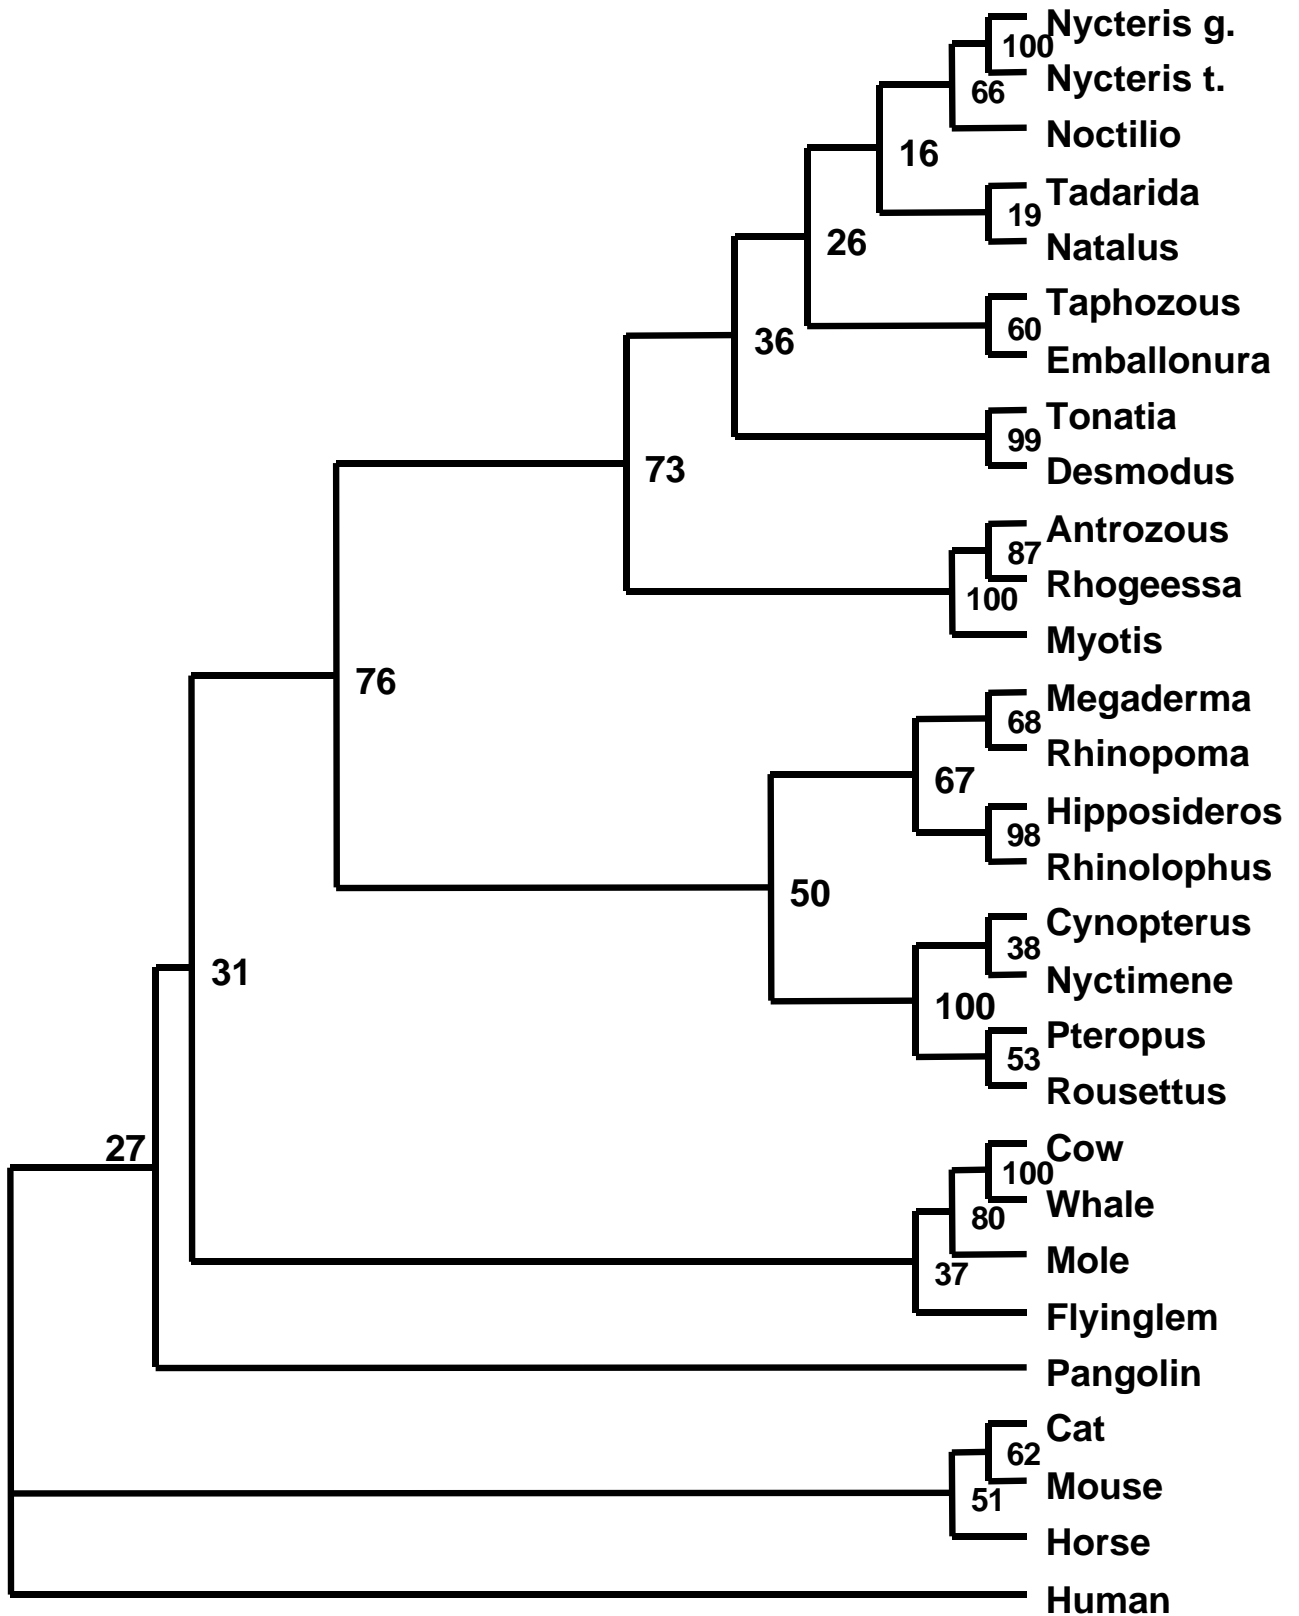

Supplement: pnas_022477199_4.pdf [file pnas_022477199_4.pdf]

**%A+T in Variable Positions**

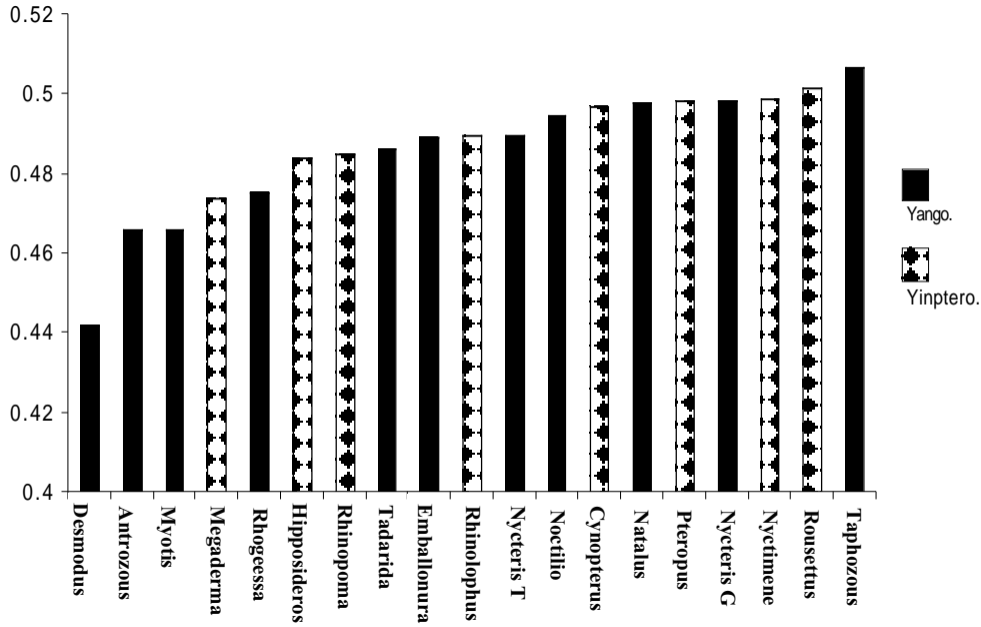

Supplement: pnas_022477199_5.pdf [file pnas_022477199_5.pdf]
